# Supplementary material
Source: PubMed Central journal article supplement (PMC4442455)
Supplement: JVI.03137-14_zjv999090405so1.pdf [file JVI.03137-14_zjv999090405so1.pdf]

1 **Supplementary Figure 1. Evolutionary relationship of PB1-F2 truncations in H5N1**  
2 **viruses.** HA gene sequences of H5N1 viruses were aligned using MAFFT and a maximum-  
3 likelihood tree was determined using FastTree. The virus strains having PB1-F2 truncations of  
4 24/25, 57 and 8 aa are colored blue, green and fuchsia, respectively. Viruses with mutated  
5 initiating ATG are colored red. Clades were defined by taking representative sequences from the  
6 WHO/OIE/FAO H5N1 Classification Working Group.

7

8 **Supplementary Table 1. Acknowledgements for influenza virus sequences acquired from**  
9 **GISAID.**

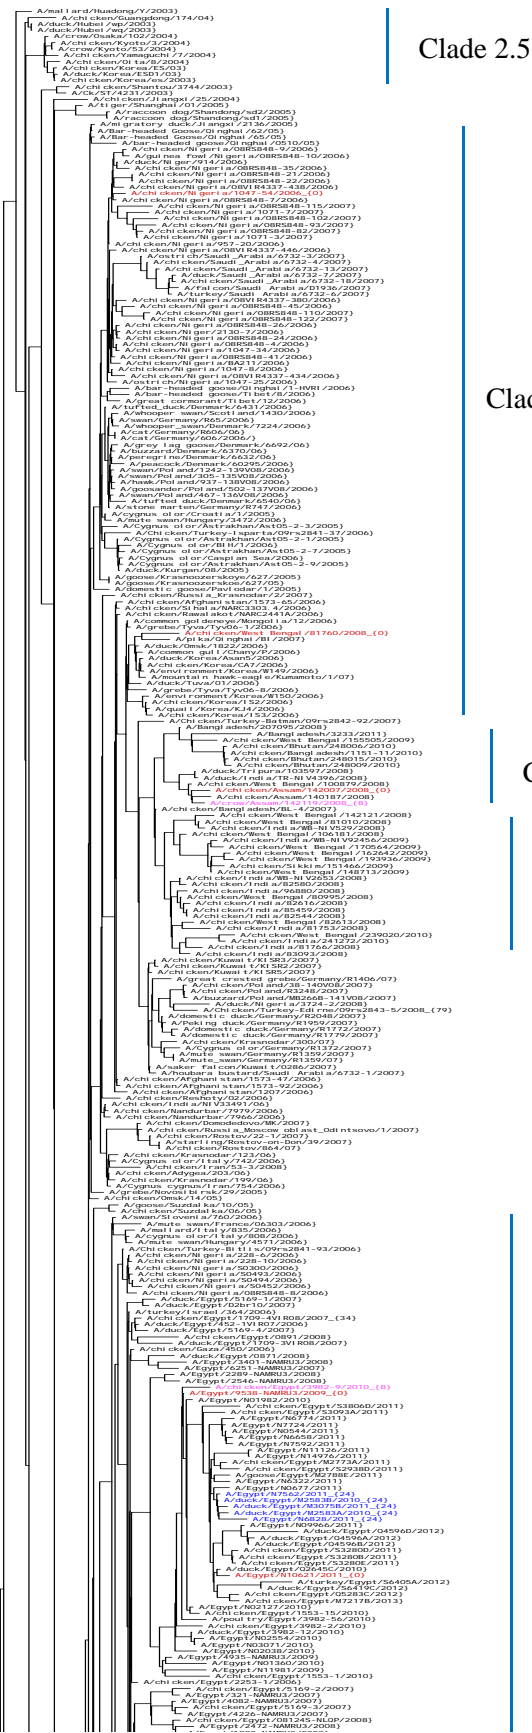

Clade 2.5

Clade 2.2

Clade 2.2.2.1

Clade 2.2.2

Clade 2.2

Clade 2.2.1

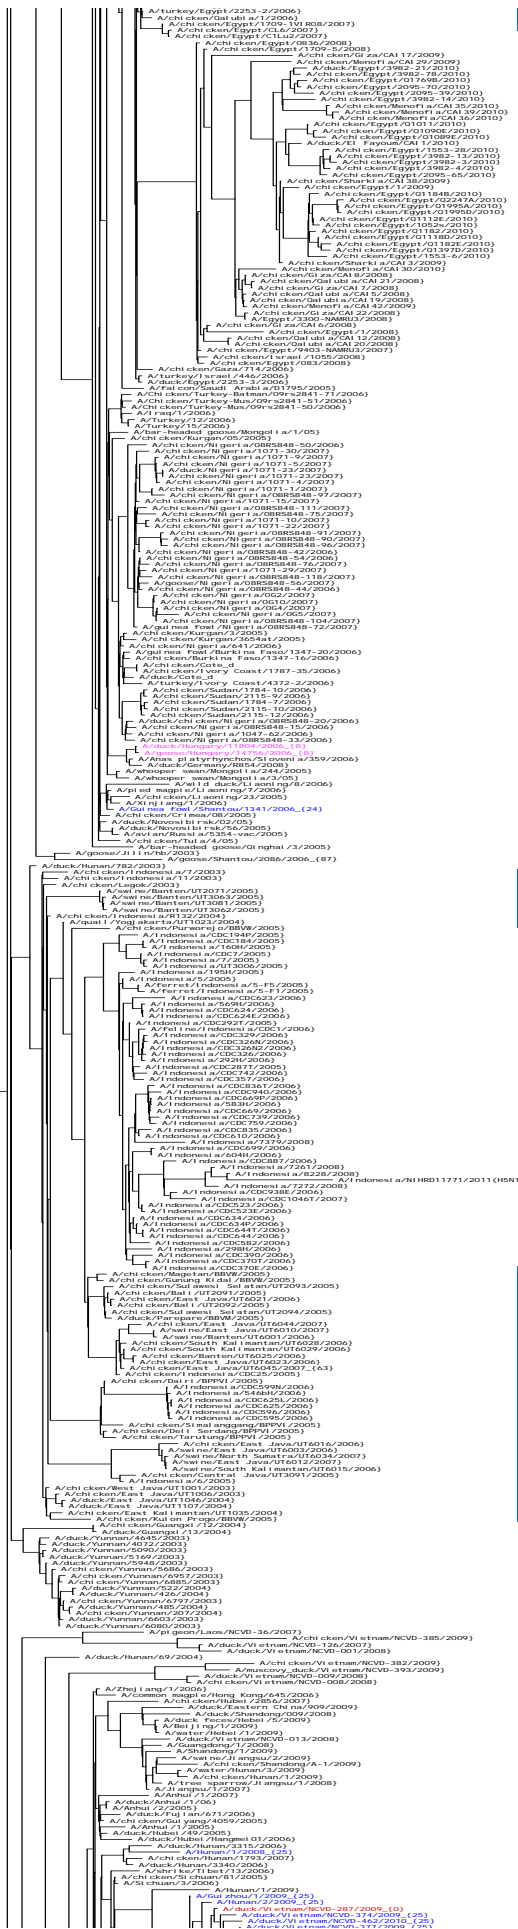

Clades 2.2.1.1, 2.2.1.1a and 2.2.1

Clade 2.2

Clade 2.1.1

Clade 2.1.3.2

Clades 2.1.3.1, 2.1.3.3, 2.1.1, 2.1.2 and 2.1.3

Clade 2.4

Clade 2.3.4

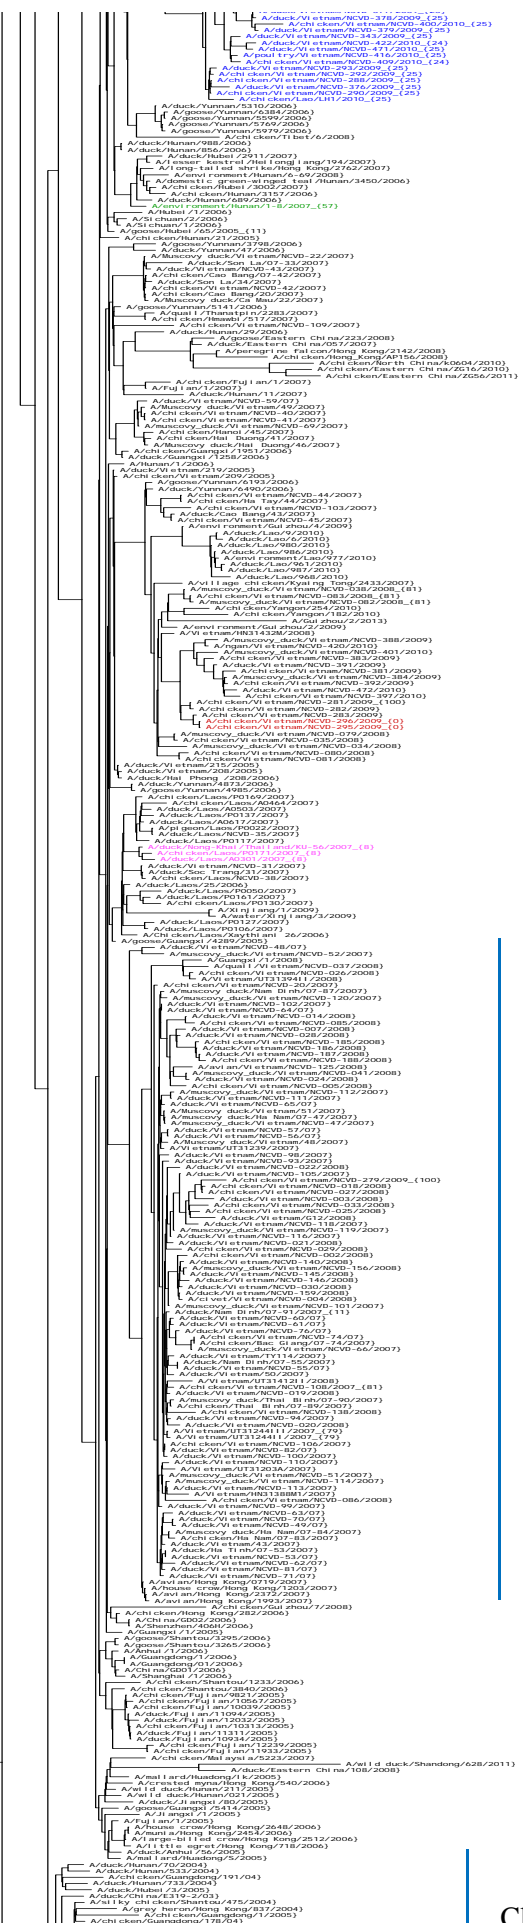

Clade 2.3.4.1

Clade 2.3.4

Clade 2.3.4.2

Clade 2.3.4

Clade 2.3.4.3

Clade 2.3.4

Clades 2.3.1 and 2.3.2

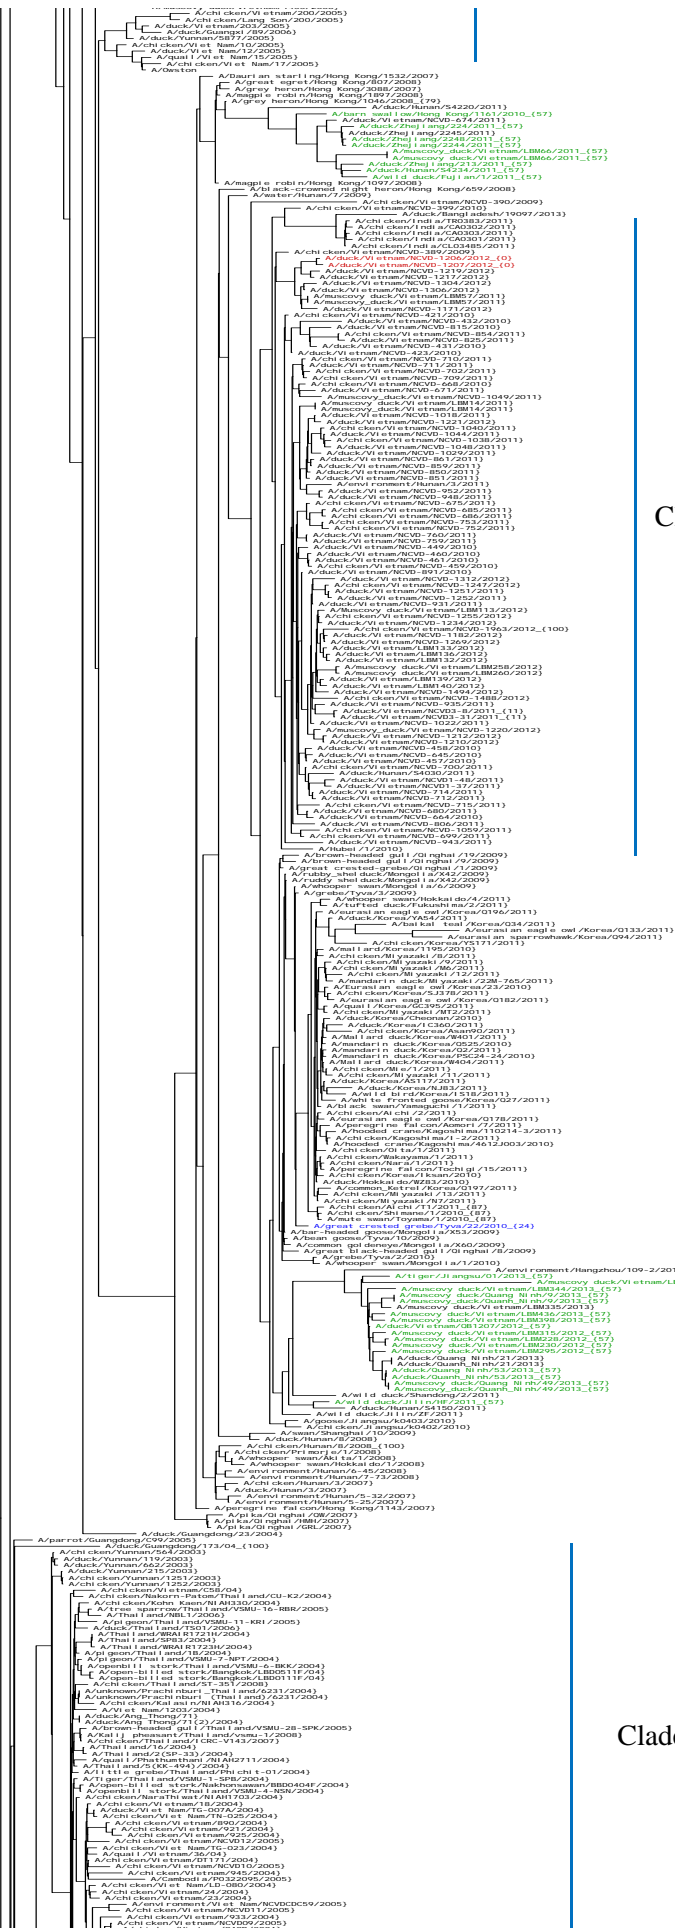

Clades 2.3.2.1 and 2.3.2.1b

Clade 2.3.2.1a

Clade 2.3.2.1c

Clades 2.3.2.1 and 2.3.2.1c

Clade 1

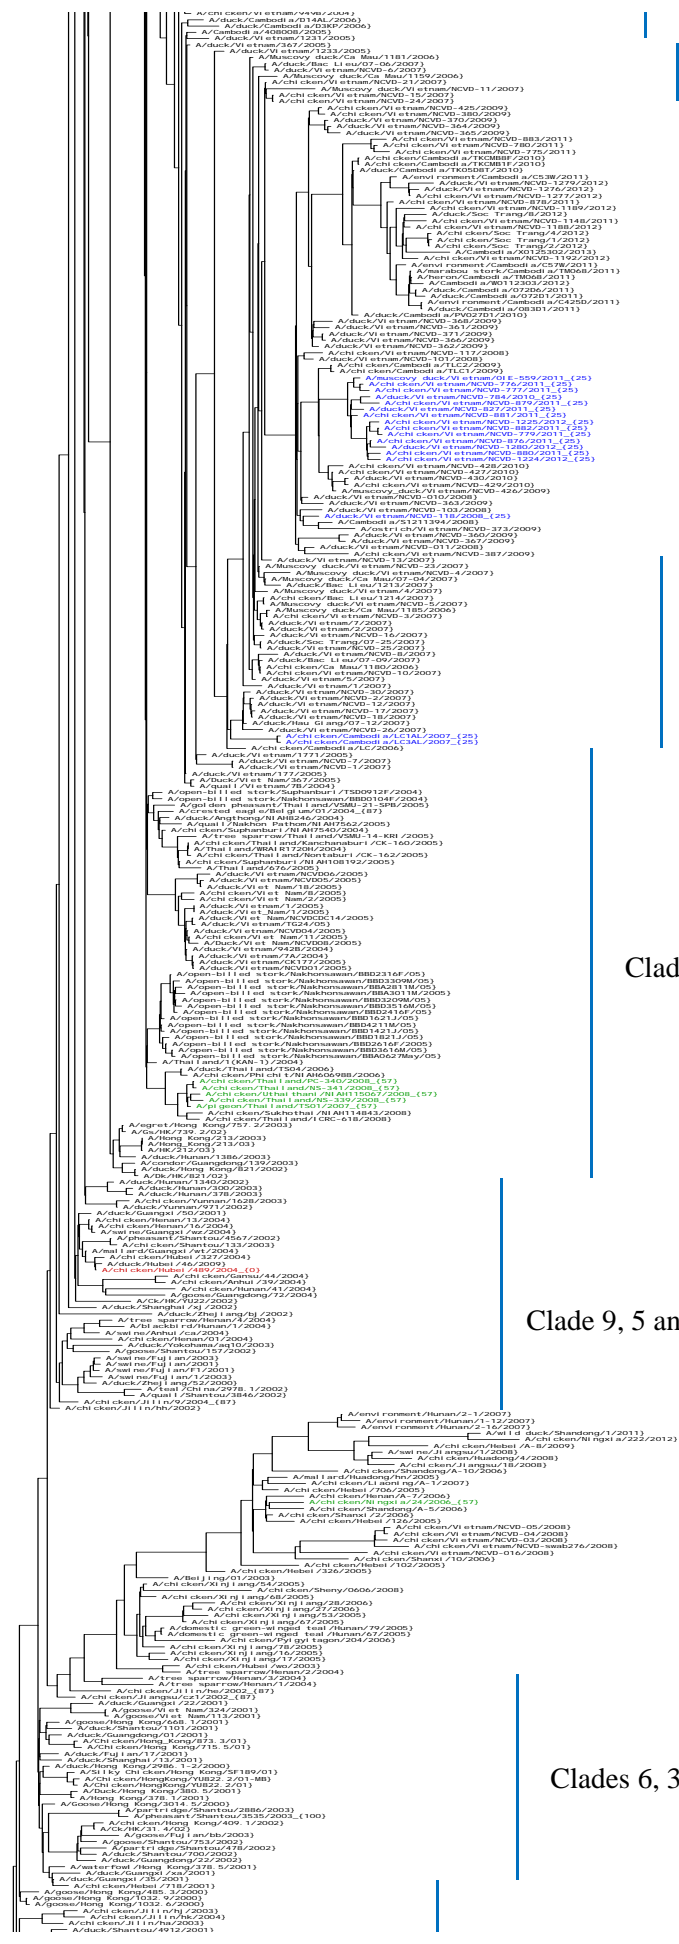

Clade 1.1

Clade 1.1.2

Clade 1.1.1

Clade 1.1

Clade 1

Clade 9, 5 and 6

Clades 7, 7.1 and 7.2

Clades 6, 3 and 4

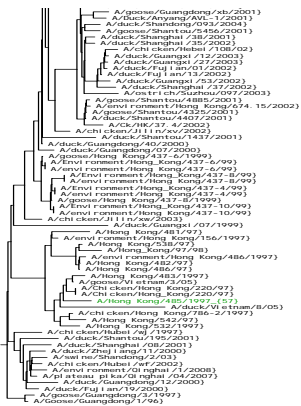

Clade "0"

0.02

Supplementary Table 1

| <i>We acknowledge the authors, originating and submitting laboratories of the sequences from GISAID's EpiFlu™ Database on which this research is based. The list is detailed below.</i> |         |         |                 |                                    |                                       |                                                     |
|-----------------------------------------------------------------------------------------------------------------------------------------------------------------------------------------|---------|---------|-----------------|------------------------------------|---------------------------------------|-----------------------------------------------------|
| <i>All submitters of data may be contacted directly via the GISAID website <a href="http://www.gisaid.org">www.gisaid.org</a></i>                                                       |         |         |                 |                                    |                                       |                                                     |
| Segment ID                                                                                                                                                                              | Segment | Country | Collection date | Isolate name                       | Originating Lab                       | Submitting Lab                                      |
| EPI466488                                                                                                                                                                               | PB1     | China   | 2013-Apr-06     | A/quail/Jiangsu/WX3/2013           | Yangzhou University                   | Chinese Academy of Sciences                         |
| EPI490870                                                                                                                                                                               | PB1     | Germany | 2013-Apr-11     | A/turkey/Germany-NI/R534/2013      |                                       | Friedrich-Loeffler-Institut                         |
| EPI464952                                                                                                                                                                               | PB1     | Italy   | 2012-Jun-28     | A/turkey/Italy/12VIR-8036-2/2012   | Istituto Zooprofilattico Sperimentale | Istituto Zooprofilattico Sperimentale Delle Venezie |
| EPI464936                                                                                                                                                                               | PB1     | Italy   | 2012-Aug-31     | A/turkey/Italy/12VIR-6607-5/2012   | Istituto Zooprofilattico Sperimentale | Istituto Zooprofilattico Sperimentale Delle Venezie |
| EPI457643                                                                                                                                                                               | PB1     | China   | 2013-Apr-20     | A/homing pigeon/Jiangsu/SD184/2013 | Harbin Veterinary Research Institute  | Harbin Veterinary Research Institute                |
| EPI457635                                                                                                                                                                               | PB1     | China   | 2013-Apr-03     | A/pigeon/Shanghai/S1421/2013       | Harbin Veterinary Research Institute  | Harbin Veterinary Research Institute                |
| EPI457627                                                                                                                                                                               | PB1     | China   | 2013-Apr-03     | A/pigeon/Shanghai/S1423/2013       | Harbin Veterinary Research Institute  | Harbin Veterinary Research Institute                |
| EPI457619                                                                                                                                                                               | PB1     | China   | 2013-Apr-17     | A/wild pigeon/Jiangsu/SD001/2013   | Harbin Veterinary Research Institute  | Harbin Veterinary Research Institute                |
| EPI440699                                                                                                                                                                               | PB1     | China   | 2013-Apr-02     | A/Pigeon/Shanghai/S1069/2013       | Harbin Veterinary Research Institute  | Harbin Veterinary Research Institute                |
| EPI412102                                                                                                                                                                               | PB1     | Germany | 2012-Jan-01     | A/swine/Germany/R495/2012          |                                       | Friedrich-Loeffler-Institut                         |
| EPI411974                                                                                                                                                                               | PB1     | Germany | 2011-Jan-01     | A/swine/Germany/R83/2011           |                                       | Friedrich-Loeffler-Institut                         |
| EPI411949                                                                                                                                                                               | PB1     | Germany | 2010-Jan-01     | A/swine/Germany/R1421/2010         |                                       | Friedrich-Loeffler-Institut                         |
| EPI411929                                                                                                                                                                               | PB1     | Germany | 2010-Jan-01     | A/swine/Germany/R819/2010          |                                       | Friedrich-Loeffler-Institut                         |
| EPI411906                                                                                                                                                                               | PB1     | Germany | 2010-Jan-01     | A/swine/Germany/R494/2010          |                                       | Friedrich-Loeffler-Institut                         |
| EPI411887                                                                                                                                                                               | PB1     | Germany | 2009-Jan-01     | A/swine/Germany/R2807/2009         |                                       | Friedrich-Loeffler-Institut                         |
| EPI411859                                                                                                                                                                               | PB1     | Germany | 2009-Jan-01     | A/swine/Germany/R325/2009          |                                       | Friedrich-Loeffler-Institut                         |
| EPI497538                                                                                                                                                                               | PB1     | China   | 2012-Oct-09     | A/environment/Jiangxi/02899/2012   |                                       | WHO Chinese National Influenza Center               |
| EPI497535                                                                                                                                                                               | PB1     | China   | 2012-Oct-09     | A/environment/Jiangxi/02895/2012   |                                       | WHO Chinese National Influenza Center               |
| EPI497522                                                                                                                                                                               | PB1     | China   | 2013-Feb-27     | A/environment/Jiangxi/00452/2013   |                                       | WHO Chinese National Influenza Center               |
| EPI497519                                                                                                                                                                               | PB1     | China   | 2013-Feb-27     | A/environment/Jiangxi/00449/2013   |                                       | WHO Chinese National Influenza Center               |
| EPI497498                                                                                                                                                                               | PB1     | China   | 2013-Mar-13     | A/environment/Chongqing/00516/2013 |                                       | WHO Chinese National Influenza Center               |
| EPI457723                                                                                                                                                                               | PB1     | China   | 2013-Apr-30     | A/environment/Fujian/SC337/2013    | Harbin Veterinary Research Institute  | Harbin Veterinary Research Institute                |
| EPI457715                                                                                                                                                                               | PB1     | China   | 2013-Apr-24     | A/environment/Henan/SC232/2013     | Harbin Veterinary Research Institute  | Harbin Veterinary Research Institute                |
| EPI457707                                                                                                                                                                               | PB1     | China   | 2013-Apr-24     | A/environment/Henan/SD429/2013     | Harbin Veterinary Research Institute  | Harbin Veterinary Research Institute                |
| EPI457699                                                                                                                                                                               | PB1     | China   | 2013-May-03     | A/environment/Shandong/SD038/2013  | Harbin Veterinary Research Institute  | Harbin Veterinary Research Institute                |
| EPI457691                                                                                                                                                                               | PB1     | China   | 2013-May-03     | A/environment/Shandong/SD039/2013  | Harbin Veterinary Research Institute  | Harbin Veterinary Research Institute                |
| EPI457683                                                                                                                                                                               | PB1     | China   | 2013-May-03     | A/environment/Shandong/SD049/2013  | Harbin Veterinary Research Institute  | Harbin Veterinary Research Institute                |
| EPI457675                                                                                                                                                                               | PB1     | China   | 2013-Apr-03     | A/environment/Shanghai/S1436/2013  | Harbin Veterinary Research Institute  | Harbin Veterinary Research Institute                |
| EPI457667                                                                                                                                                                               | PB1     | China   | 2013-Apr-03     | A/environment/Shanghai/S1437/2013  | Harbin Veterinary Research Institute  | Harbin Veterinary Research Institute                |
| EPI457659                                                                                                                                                                               | PB1     | China   | 2013-Apr-03     | A/environment/Shanghai/S1438/2013  | Harbin Veterinary Research Institute  | Harbin Veterinary Research Institute                |



Supplementary Table 1

|           |     |               |             |                                      |                                                                |                                                    |
|-----------|-----|---------------|-------------|--------------------------------------|----------------------------------------------------------------|----------------------------------------------------|
| EPI457651 | PB1 | China         | 2013-Apr-03 | A/environment/Shanghai/S1439/2013    | Harbin Veterinary Research Institute                           | Harbin Veterinary Research Institute               |
| EPI448285 | PB1 | Bangladesh    | 2010-May-25 | A/environment/Bangladesh/100/2010    | Institute of Epidemiology Disease Control                      | Centers for Disease Control and Prevention         |
| EPI448261 | PB1 | Bangladesh    | 2012-Feb-28 | A/environment/Bangladesh/1019-G/2012 | Institute of Epidemiology Disease Control                      | Centers for Disease Control and Prevention         |
| EPI448253 | PB1 | Bangladesh    | 2011-Dec-30 | A/environment/Bangladesh/1017-1/2011 | Institute of Epidemiology Disease Control                      | Centers for Disease Control and Prevention         |
| EPI448245 | PB1 | Bangladesh    | 2011-Dec-28 | A/environment/Bangladesh/1011/2011   | Institute of Epidemiology Disease Control                      | Centers for Disease Control and Prevention         |
| EPI448237 | PB1 | Bangladesh    | 2011-Sep-29 | A/environment/Bangladesh/1018/2011   | Institute of Epidemiology Disease Control                      | Centers for Disease Control and Prevention         |
| EPI448117 | PB1 | Bangladesh    | 2011-May-29 | A/environment/Bangladesh/1017/2011   | Institute of Epidemiology Disease Control                      | Centers for Disease Control and Prevention         |
| EPI447650 | PB1 | China         | 2013-Apr-27 | A/Environment/Shandong/1/2013        |                                                                | WHO Chinese National Influenza Center              |
| EPI440691 | PB1 | China         | 2013-Apr-03 | A/Environment/Shanghai/S1088/2013    | Harbin Veterinary Research Institute                           | Harbin Veterinary Research Institute               |
| EPI443649 | PB1 | China         | 2013-Apr-04 | A/environment/Hangzhou/37/2013       | Hangzhou Center for Disease Control and Prevention             | Hangzhou Center for Disease Control and Prevention |
| EPI473791 | PB1 | China         | 2013-Apr-04 | A/environment/Hangzhou/34-2/2013     | Hangzhou Center for Disease Control and Prevention             | Hangzhou Center for Disease Control and Prevention |
| EPI468344 | PB1 | China         | 2013-Apr-12 | A/environment/Hangzhou/109-2/2013    | Hangzhou Center for Disease Control and Prevention             | Hangzhou Center for Disease Control and Prevention |
| EPI443673 | PB1 | China         | 2013-Apr-12 | A/environment/Hangzhou/109-1/2013    | Hangzhou Center for Disease Control and Prevention             | Hangzhou Center for Disease Control and Prevention |
| EPI443570 | PB1 | China         | 2013-Apr-04 | A/environment/Hangzhou/34-1/2013     | Hangzhou Center for Disease Control and Prevention             | Hangzhou Center for Disease Control and Prevention |
| EPI491033 | PB1 | China         | 2013-May-14 | A/environment/Guangdong/C130582      | Guangdong Provincial Center for Disease Control and Prevention | Guandong Centers for Disease Control               |
| EPI491025 | PB1 | China         | 2013-May-18 | A/environment/Guangdong/2013XN1      | Guangdong Provincial Center for Disease Control and Prevention | Guandong Centers for Disease Control               |
| EPI491017 | PB1 | China         | 2013-May-14 | A/environment/Guangdong/C130582      | Guangdong Provincial Center for Disease Control and Prevention | Guandong Centers for Disease Control               |
| EPI491009 | PB1 | China         | 2013-May-28 | A/environment/Guangdong/GD13021      | Guangdong Provincial Center for Disease Control and Prevention | Guandong Centers for Disease Control               |
| EPI491001 | PB1 | China         | 2013-May-28 | A/environment/Guangdong/GD13020      | Guangdong Provincial Center for Disease Control and Prevention | Guandong Centers for Disease Control               |
| EPI490993 | PB1 | China         | 2013-May-07 | A/environment/Guangdong/GD13018      | Guangdong Provincial Center for Disease Control and Prevention | Guandong Centers for Disease Control               |
| EPI490985 | PB1 | China         | 2013-Apr-17 | A/environment/Guangdong/C132800      | Guangdong Provincial Center for Disease Control and Prevention | Guandong Centers for Disease Control               |
| EPI490977 | PB1 | China         | 2013-Apr-26 | A/Environment/Guangdong/C132810      | Guangdong Provincial Center for Disease Control and Prevention | Guandong Centers for Disease Control               |
| EPI490969 | PB1 | China         | 2013-Apr-26 | A/Environment/Guangdong/C132810      | Guangdong Provincial Center for Disease Control and Prevention | Guandong Centers for Disease Control               |
| EPI465411 | PB1 | China         | 2013-Apr-07 | A/Environment/Zhenjiang/h9/2013      | Jiangsu Provincial Center for Disease Control and Prevention   | institution of microbiology                        |
| EPI489318 | PB1 | United States | 2012-Jan-01 | A/New York/39/2012 X-233             | New York Medical College                                       | Centers for Disease Control and Prevention         |
| EPI432531 | PB1 | China         | 2010-Apr-27 | r8                                   | Harbin Veterinary Research Institute                           | Harbin Veterinary Research Institute               |
| EPI432523 | PB1 | China         | 2010-Apr-27 | r78                                  | Harbin Veterinary Research Institute                           | Harbin Veterinary Research Institute               |
| EPI432515 | PB1 | China         | 2010-Apr-27 | r7                                   | Harbin Veterinary Research Institute                           | Harbin Veterinary Research Institute               |
| EPI432507 | PB1 | China         | 2010-Apr-27 | r68                                  | Harbin Veterinary Research Institute                           | Harbin Veterinary Research Institute               |
| EPI432499 | PB1 | China         | 2010-Apr-27 | r678                                 | Harbin Veterinary Research Institute                           | Harbin Veterinary Research Institute               |
| EPI432491 | PB1 | China         | 2010-Apr-27 | r67                                  | Harbin Veterinary Research Institute                           | Harbin Veterinary Research Institute               |
| EPI432483 | PB1 | China         | 2010-Apr-21 | r6                                   | Harbin Veterinary Research Institute                           | Harbin Veterinary Research Institute               |
| EPI432475 | PB1 | China         | 2010-Apr-21 | r58                                  | Harbin Veterinary Research Institute                           | Harbin Veterinary Research Institute               |
| EPI432467 | PB1 | China         | 2010-Apr-21 | r578                                 | Harbin Veterinary Research Institute                           | Harbin Veterinary Research Institute               |

Supplementary Table 1

|           |     |       |             |        |                                     |                                      |
|-----------|-----|-------|-------------|--------|-------------------------------------|--------------------------------------|
| EPI432459 | PB1 | China | 2010-Apr-21 | r57    | Harbin Veterinary Research Institut | Harbin Veterinary Research Institute |
| EPI432451 | PB1 | China | 2010-Apr-21 | r568   | Harbin Veterinary Research Institut | Harbin Veterinary Research Institute |
| EPI432443 | PB1 | China | 2010-Apr-21 | r5678  | Harbin Veterinary Research Institut | Harbin Veterinary Research Institute |
| EPI432435 | PB1 | China | 2010-Apr-21 | r567   | Harbin Veterinary Research Institut | Harbin Veterinary Research Institute |
| EPI432427 | PB1 | China | 2010-Apr-16 | r56    | Harbin Veterinary Research Institut | Harbin Veterinary Research Institute |
| EPI432419 | PB1 | China | 2010-Apr-16 | r5     | Harbin Veterinary Research Institut | Harbin Veterinary Research Institute |
| EPI432411 | PB1 | China | 2010-Apr-16 | r38    | Harbin Veterinary Research Institut | Harbin Veterinary Research Institute |
| EPI432403 | PB1 | China | 2010-Apr-16 | r378   | Harbin Veterinary Research Institut | Harbin Veterinary Research Institute |
| EPI432395 | PB1 | China | 2010-Apr-16 | r37    | Harbin Veterinary Research Institut | Harbin Veterinary Research Institute |
| EPI432387 | PB1 | China | 2010-Apr-16 | r368   | Harbin Veterinary Research Institut | Harbin Veterinary Research Institute |
| EPI432379 | PB1 | China | 2010-Apr-10 | r3678  | Harbin Veterinary Research Institut | Harbin Veterinary Research Institute |
| EPI432371 | PB1 | China | 2010-Apr-10 | r367   | Harbin Veterinary Research Institut | Harbin Veterinary Research Institute |
| EPI432363 | PB1 | China | 2010-Apr-10 | r36    | Harbin Veterinary Research Institut | Harbin Veterinary Research Institute |
| EPI432355 | PB1 | China | 2010-Apr-10 | r358   | Harbin Veterinary Research Institut | Harbin Veterinary Research Institute |
| EPI432347 | PB1 | China | 2010-Apr-10 | r3578  | Harbin Veterinary Research Institut | Harbin Veterinary Research Institute |
| EPI432339 | PB1 | China | 2010-Apr-03 | r357   | Harbin Veterinary Research Institut | Harbin Veterinary Research Institute |
| EPI432331 | PB1 | China | 2010-Apr-03 | r3568  | Harbin Veterinary Research Institut | Harbin Veterinary Research Institute |
| EPI432323 | PB1 | China | 2010-Apr-03 | r35678 | Harbin Veterinary Research Institut | Harbin Veterinary Research Institute |
| EPI432315 | PB1 | China | 2010-Apr-03 | r3567  | Harbin Veterinary Research Institut | Harbin Veterinary Research Institute |
| EPI432307 | PB1 | China | 2010-Apr-03 | r356   | Harbin Veterinary Research Institut | Harbin Veterinary Research Institute |
| EPI432299 | PB1 | China | 2010-Apr-03 | r35    | Harbin Veterinary Research Institut | Harbin Veterinary Research Institute |
| EPI432291 | PB1 | China | 2010-Apr-03 | r3     | Harbin Veterinary Research Institut | Harbin Veterinary Research Institute |
| EPI432283 | PB1 | China | 2010-Mar-28 | r28    | Harbin Veterinary Research Institut | Harbin Veterinary Research Institute |
| EPI432275 | PB1 | China | 2010-Mar-28 | r278   | Harbin Veterinary Research Institut | Harbin Veterinary Research Institute |
| EPI432267 | PB1 | China | 2010-Mar-28 | r27    | Harbin Veterinary Research Institut | Harbin Veterinary Research Institute |
| EPI432259 | PB1 | China | 2010-Mar-28 | r268   | Harbin Veterinary Research Institut | Harbin Veterinary Research Institute |
| EPI432251 | PB1 | China | 2010-Mar-28 | r2678  | Harbin Veterinary Research Institut | Harbin Veterinary Research Institute |
| EPI432243 | PB1 | China | 2010-Mar-28 | r267   | Harbin Veterinary Research Institut | Harbin Veterinary Research Institute |
| EPI432235 | PB1 | China | 2010-Mar-22 | r26    | Harbin Veterinary Research Institut | Harbin Veterinary Research Institute |
| EPI432227 | PB1 | China | 2010-Mar-22 | r258   | Harbin Veterinary Research Institut | Harbin Veterinary Research Institute |
| EPI432219 | PB1 | China | 2010-Mar-22 | r2578  | Harbin Veterinary Research Institut | Harbin Veterinary Research Institute |
| EPI432211 | PB1 | China | 2010-Mar-22 | r257   | Harbin Veterinary Research Institut | Harbin Veterinary Research Institute |
| EPI432203 | PB1 | China | 2010-Mar-22 | r2568  | Harbin Veterinary Research Institut | Harbin Veterinary Research Institute |
| EPI432195 | PB1 | China | 2010-Mar-22 | r25678 | Harbin Veterinary Research Institut | Harbin Veterinary Research Institute |

Supplementary Table 1

|           |     |       |             |         |                                     |                                      |
|-----------|-----|-------|-------------|---------|-------------------------------------|--------------------------------------|
| EPI432187 | PB1 | China | 2010-Mar-17 | r2567   | Harbin Veterinary Research Institut | Harbin Veterinary Research Institute |
| EPI432179 | PB1 | China | 2010-Mar-17 | r256    | Harbin Veterinary Research Institut | Harbin Veterinary Research Institute |
| EPI432171 | PB1 | China | 2010-Mar-17 | r25     | Harbin Veterinary Research Institut | Harbin Veterinary Research Institute |
| EPI432163 | PB1 | China | 2010-Mar-17 | r238    | Harbin Veterinary Research Institut | Harbin Veterinary Research Institute |
| EPI432155 | PB1 | China | 2010-Mar-17 | r2378   | Harbin Veterinary Research Institut | Harbin Veterinary Research Institute |
| EPI432147 | PB1 | China | 2010-Mar-17 | r237    | Harbin Veterinary Research Institut | Harbin Veterinary Research Institute |
| EPI432139 | PB1 | China | 2010-Mar-12 | r2368   | Harbin Veterinary Research Institut | Harbin Veterinary Research Institute |
| EPI432131 | PB1 | China | 2010-Mar-12 | r23678  | Harbin Veterinary Research Institut | Harbin Veterinary Research Institute |
| EPI432123 | PB1 | China | 2010-Mar-12 | r2367   | Harbin Veterinary Research Institut | Harbin Veterinary Research Institute |
| EPI432115 | PB1 | China | 2010-Mar-12 | r236    | Harbin Veterinary Research Institut | Harbin Veterinary Research Institute |
| EPI432107 | PB1 | China | 2010-Mar-12 | r2358   | Harbin Veterinary Research Institut | Harbin Veterinary Research Institute |
| EPI432099 | PB1 | China | 2010-Mar-12 | r23578  | Harbin Veterinary Research Institut | Harbin Veterinary Research Institute |
| EPI432091 | PB1 | China | 2010-Mar-07 | r2357   | Harbin Veterinary Research Institut | Harbin Veterinary Research Institute |
| EPI432083 | PB1 | China | 2010-Mar-07 | r23568  | Harbin Veterinary Research Institut | Harbin Veterinary Research Institute |
| EPI432075 | PB1 | China | 2010-Mar-07 | r235678 | Harbin Veterinary Research Institut | Harbin Veterinary Research Institute |
| EPI432067 | PB1 | China | 2010-Mar-07 | r23567  | Harbin Veterinary Research Institut | Harbin Veterinary Research Institute |
| EPI432059 | PB1 | China | 2010-Mar-07 | r2356   | Harbin Veterinary Research Institut | Harbin Veterinary Research Institute |
| EPI432051 | PB1 | China | 2010-Mar-07 | r235    | Harbin Veterinary Research Institut | Harbin Veterinary Research Institute |
| EPI432043 | PB1 | China | 2010-Mar-02 | r23     | Harbin Veterinary Research Institut | Harbin Veterinary Research Institute |
| EPI432035 | PB1 | China | 2010-Mar-02 | r2      | Harbin Veterinary Research Institut | Harbin Veterinary Research Institute |
| EPI432027 | PB1 | China | 2010-Mar-02 | r18     | Harbin Veterinary Research Institut | Harbin Veterinary Research Institute |
| EPI432019 | PB1 | China | 2010-Mar-02 | r178    | Harbin Veterinary Research Institut | Harbin Veterinary Research Institute |
| EPI432011 | PB1 | China | 2010-Mar-02 | r17     | Harbin Veterinary Research Institut | Harbin Veterinary Research Institute |
| EPI432003 | PB1 | China | 2010-Mar-02 | r168    | Harbin Veterinary Research Institut | Harbin Veterinary Research Institute |
| EPI431995 | PB1 | China | 2012-Feb-25 | r1678   | Harbin Veterinary Research Institut | Harbin Veterinary Research Institute |
| EPI431987 | PB1 | China | 2012-Feb-25 | r167    | Harbin Veterinary Research Institut | Harbin Veterinary Research Institute |
| EPI431979 | PB1 | China | 2012-Feb-25 | r16     | Harbin Veterinary Research Institut | Harbin Veterinary Research Institute |
| EPI431971 | PB1 | China | 2012-Feb-25 | r158    | Harbin Veterinary Research Institut | Harbin Veterinary Research Institute |
| EPI431963 | PB1 | China | 2012-Feb-25 | r1578   | Harbin Veterinary Research Institut | Harbin Veterinary Research Institute |
| EPI431955 | PB1 | China | 2012-Feb-25 | r157    | Harbin Veterinary Research Institut | Harbin Veterinary Research Institute |
| EPI431947 | PB1 | China | 2010-Feb-18 | r1568   | Harbin Veterinary Research Institut | Harbin Veterinary Research Institute |
| EPI431939 | PB1 | China | 2010-Feb-18 | r15678  | Harbin Veterinary Research Institut | Harbin Veterinary Research Institute |
| EPI431931 | PB1 | China | 2010-Feb-18 | r1567   | Harbin Veterinary Research Institut | Harbin Veterinary Research Institute |
| EPI431923 | PB1 | China | 2010-Feb-18 | r156    | Harbin Veterinary Research Institut | Harbin Veterinary Research Institute |

Supplementary Table 1

|           |     |       |             |         |                                     |                                      |
|-----------|-----|-------|-------------|---------|-------------------------------------|--------------------------------------|
| EPI431915 | PB1 | China | 2010-Feb-18 | r15     | Harbin Veterinary Research Institut | Harbin Veterinary Research Institute |
| EPI431907 | PB1 | China | 2010-Feb-18 | r138    | Harbin Veterinary Research Institut | Harbin Veterinary Research Institute |
| EPI431899 | PB1 | China | 2010-Feb-10 | r1378   | Harbin Veterinary Research Institut | Harbin Veterinary Research Institute |
| EPI431891 | PB1 | China | 2010-Feb-10 | r137    | Harbin Veterinary Research Institut | Harbin Veterinary Research Institute |
| EPI431883 | PB1 | China | 2010-Feb-10 | r1368   | Harbin Veterinary Research Institut | Harbin Veterinary Research Institute |
| EPI431875 | PB1 | China | 2010-Feb-10 | r13678  | Harbin Veterinary Research Institut | Harbin Veterinary Research Institute |
| EPI431867 | PB1 | China | 2010-Feb-10 | r1367   | Harbin Veterinary Research Institut | Harbin Veterinary Research Institute |
| EPI431859 | PB1 | China | 2010-Feb-10 | r136    | Harbin Veterinary Research Institut | Harbin Veterinary Research Institute |
| EPI431851 | PB1 | China | 2010-Feb-05 | r1358   | Harbin Veterinary Research Institut | Harbin Veterinary Research Institute |
| EPI431843 | PB1 | China | 2010-Feb-05 | r13578  | Harbin Veterinary Research Institut | Harbin Veterinary Research Institute |
| EPI431835 | PB1 | China | 2010-Feb-05 | r1357   | Harbin Veterinary Research Institut | Harbin Veterinary Research Institute |
| EPI431827 | PB1 | China | 2010-Feb-05 | r13568  | Harbin Veterinary Research Institut | Harbin Veterinary Research Institute |
| EPI431819 | PB1 | China | 2010-Feb-05 | r135678 | Harbin Veterinary Research Institut | Harbin Veterinary Research Institute |
| EPI431811 | PB1 | China | 2010-Feb-05 | r13567  | Harbin Veterinary Research Institut | Harbin Veterinary Research Institute |
| EPI431803 | PB1 | China | 2010-Jan-31 | r1356   | Harbin Veterinary Research Institut | Harbin Veterinary Research Institute |
| EPI431795 | PB1 | China | 2010-Jan-31 | r135    | Harbin Veterinary Research Institut | Harbin Veterinary Research Institute |
| EPI431787 | PB1 | China | 2010-Jan-31 | r13     | Harbin Veterinary Research Institut | Harbin Veterinary Research Institute |
| EPI431779 | PB1 | China | 2010-Jan-31 | r128    | Harbin Veterinary Research Institut | Harbin Veterinary Research Institute |
| EPI431771 | PB1 | China | 2010-Jan-31 | r1278   | Harbin Veterinary Research Institut | Harbin Veterinary Research Institute |
| EPI431763 | PB1 | China | 2010-Jan-31 | r127    | Harbin Veterinary Research Institut | Harbin Veterinary Research Institute |
| EPI431755 | PB1 | China | 2010-Jan-26 | r1268   | Harbin Veterinary Research Institut | Harbin Veterinary Research Institute |
| EPI431747 | PB1 | China | 2010-Jan-26 | r12678  | Harbin Veterinary Research Institut | Harbin Veterinary Research Institute |
| EPI431739 | PB1 | China | 2010-Jan-26 | r1267   | Harbin Veterinary Research Institut | Harbin Veterinary Research Institute |
| EPI431731 | PB1 | China | 2010-Jan-26 | r126    | Harbin Veterinary Research Institut | Harbin Veterinary Research Institute |
| EPI431723 | PB1 | China | 2010-Jan-26 | r1258   | Harbin Veterinary Research Institut | Harbin Veterinary Research Institute |
| EPI431715 | PB1 | China | 2010-Jan-26 | r12578  | Harbin Veterinary Research Institut | Harbin Veterinary Research Institute |
| EPI431707 | PB1 | China | 2010-Jan-20 | r1257   | Harbin Veterinary Research Institut | Harbin Veterinary Research Institute |
| EPI431699 | PB1 | China | 2010-Jan-20 | r12568  | Harbin Veterinary Research Institut | Harbin Veterinary Research Institute |
| EPI431691 | PB1 | China | 2010-Jan-20 | r125678 | Harbin Veterinary Research Institut | Harbin Veterinary Research Institute |
| EPI431683 | PB1 | China | 2010-Jan-20 | r12567  | Harbin Veterinary Research Institut | Harbin Veterinary Research Institute |
| EPI431675 | PB1 | China | 2010-Jan-20 | r1256   | Harbin Veterinary Research Institut | Harbin Veterinary Research Institute |
| EPI431667 | PB1 | China | 2010-Jan-20 | r125    | Harbin Veterinary Research Institut | Harbin Veterinary Research Institute |
| EPI431659 | PB1 | China | 2010-Jan-16 | r1238   | Harbin Veterinary Research Institut | Harbin Veterinary Research Institute |
| EPI431651 | PB1 | China | 2010-Jan-16 | r12378  | Harbin Veterinary Research Institut | Harbin Veterinary Research Institute |

Supplementary Table 1

|           |     |              |             |                           |                                      |                                                                        |
|-----------|-----|--------------|-------------|---------------------------|--------------------------------------|------------------------------------------------------------------------|
| EPI431643 | PB1 | China        | 2010-Jan-16 | r1237                     | Harbin Veterinary Research Institut  | Harbin Veterinary Research Institute                                   |
| EPI431635 | PB1 | China        | 2010-Jan-16 | r12368                    | Harbin Veterinary Research Institut  | Harbin Veterinary Research Institute                                   |
| EPI431627 | PB1 | China        | 2010-Jan-16 | r123678                   | Harbin Veterinary Research Institut  | Harbin Veterinary Research Institute                                   |
| EPI431619 | PB1 | China        | 2010-Jan-16 | r12367                    | Harbin Veterinary Research Institut  | Harbin Veterinary Research Institute                                   |
| EPI431611 | PB1 | China        | 2010-Jan-10 | r1236                     | Harbin Veterinary Research Institut  | Harbin Veterinary Research Institute                                   |
| EPI431603 | PB1 | China        | 2010-Jan-10 | r12358                    | Harbin Veterinary Research Institut  | Harbin Veterinary Research Institute                                   |
| EPI431595 | PB1 | China        | 2010-Jan-10 | r123578                   | Harbin Veterinary Research Institut  | Harbin Veterinary Research Institute                                   |
| EPI431587 | PB1 | China        | 2010-Jan-10 | r12357                    | Harbin Veterinary Research Institut  | Harbin Veterinary Research Institute                                   |
| EPI431579 | PB1 | China        | 2010-Jan-10 | r123568                   | Harbin Veterinary Research Institut  | Harbin Veterinary Research Institute                                   |
| EPI431571 | PB1 | China        | 2010-Jan-10 | r1235678                  | Harbin Veterinary Research Institut  | Harbin Veterinary Research Institute                                   |
| EPI431563 | PB1 | China        | 2010-Jan-04 | r123567                   | Harbin Veterinary Research Institut  | Harbin Veterinary Research Institute                                   |
| EPI431555 | PB1 | China        | 2010-Jan-04 | r12356                    | Harbin Veterinary Research Institut  | Harbin Veterinary Research Institute                                   |
| EPI431547 | PB1 | China        | 2010-Jan-04 | r1235                     | Harbin Veterinary Research Institut  | Harbin Veterinary Research Institute                                   |
| EPI431539 | PB1 | China        | 2010-Jan-04 | r123                      | Harbin Veterinary Research Institut  | Harbin Veterinary Research Institute                                   |
| EPI431531 | PB1 | China        | 2010-Jan-04 | r12                       | Harbin Veterinary Research Institut  | Harbin Veterinary Research Institute                                   |
| EPI431523 | PB1 | China        | 2010-Jan-04 | r1                        | Harbin Veterinary Research Institut  | Harbin Veterinary Research Institute                                   |
| EPI499443 | PB1 | Japan        | 2013-Nov-25 | A/SAPPORO/TH1/2013        | Virus Research Center, Sendai Med    | National Institute of Infectious Diseases (NIID)                       |
| EPI499445 | PB1 | Japan        | 2013-Nov-24 | A/SAPPORO/114/2013        | Sapporo City Institute of Public Hea | National Institute of Infectious Diseases (NIID)                       |
| EPI497666 | PB1 | United State | 2013-Jul-05 | A/Utah/07/2013            | Utah Department of Health            | Centers for Disease Control and Prevention                             |
| EPI503930 | PB1 | Australia    | 2013-Jun-16 | A/Victoria/506/2013       | WHO Collaborating Centre for Refe    | Centers for Disease Control and Prevention                             |
| EPI497483 | PB1 | China        | 2013-Dec-04 | A/Jiangxi-Donghu/346/2013 |                                      | WHO Chinese National Influenza Center                                  |
| EPI492811 | PB1 | United State | 2013-Nov-04 | A/Mississippi/11/2013     | Mississippi Public Health Laborator  | Centers for Disease Control and Prevention                             |
| EPI492803 | PB1 | United State | 2013-Nov-11 | A/Louisiana/13/2013       | Louisiana Department of Health an    | Centers for Disease Control and Prevention                             |
| EPI492715 | PB1 | Bangladesh   | 2013-May-12 | A/Bangladesh/9269/2013    | Institute of Epidemiology Disease C  | Centers for Disease Control and Prevention                             |
| EPI503941 | PB1 | Costa Rica   | 2013-Jul-26 | A/Costa Rica/4700/2013    | Laboratorio Nacional de Influenza    | Centers for Disease Control and Prevention                             |
| EPI492684 | PB1 | United State | 2013-Jul-10 | A/Massachusetts/11/2013   | Massachusetts Department of Publ     | Centers for Disease Control and Prevention                             |
| EPI539676 | PB1 | Australia    | 2013-Sep-23 | A/SOUTH AUSTRALIA/77/2013 | Institute of Medical and Veterinary  | WHO Collaborating Centre for Reference and Research on Influenza       |
| EPI539681 | PB1 | Australia    | 2013-Jun-29 | A/TOWNSVILLE/41/2013      | Queensland Health Scientific Servic  | WHO Collaborating Centre for Reference and Research on Influenza       |
| EPI539656 | PB1 | Papua New    | 2013-Jul-02 | A/GOROKA/27/2013          | Papua New Guinea Institute of Med    | WHO Collaborating Centre for Reference and Research on Influenza       |
| EPI490880 | PB1 | Hong Kong    | 2013-Nov-30 | A/Hong Kong/5942/2013     | Public Health Laboratory Services B  | Public Health Laboratory Services Branch, Centre for Health Protection |
| EPI490091 | PB1 | United State | 2012-Oct-20 | A/New York/39/2012        | New York State Department of Hea     | Centers for Disease Control and Prevention                             |
| EPI489310 | PB1 | United State | 2013-Jul-10 | A/Massachusetts/11/2013   | Massachusetts Department of Publ     | Centers for Disease Control and Prevention                             |
| EPI489298 | PB1 | United State | 2013-Jul-05 | A/Utah/07/2013            | Utah Department of Health            | Centers for Disease Control and Prevention                             |
| EPI500846 | PB1 | Costa Rica   | 2013-Aug-05 | A/Costa Rica/5802/2013    | Laboratorio Nacional de Influenza    | Centers for Disease Control and Prevention                             |

Supplementary Table 1

|           |     |               |             |                          |                                                          |                                                             |
|-----------|-----|---------------|-------------|--------------------------|----------------------------------------------------------|-------------------------------------------------------------|
| EPI487730 | PB1 | United States | 2013-Oct-29 | A/Utah/10/2013           | Utah Department of Health                                | Centers for Disease Control and Prevention                  |
| EPI486650 | PB1 | United States | 2013-Oct-21 | A/Louisiana/10/2013      | Louisiana Department of Health and Hospitals             | Centers for Disease Control and Prevention                  |
| EPI486642 | PB1 | United States | 2013-Oct-23 | A/Louisiana/11/2013      | Louisiana Department of Health and Hospitals             | Centers for Disease Control and Prevention                  |
| EPI486634 | PB1 | United States | 2013-Oct-09 | A/Louisiana/12/2013      | Louisiana Department of Health and Hospitals             | Centers for Disease Control and Prevention                  |
| EPI503469 | PB1 | Hong Kong     | 2013-Sep-19 | A/Hong Kong/5008/2013    | Government Virus Unit                                    | Centers for Disease Control and Prevention                  |
| EPI485806 | PB1 | Costa Rica    | 2013-Jul-26 | A/Costa Rica/4700/2013   | Laboratorio Nacional de Influenza                        | Centers for Disease Control and Prevention                  |
| EPI485798 | PB1 | Costa Rica    | 2013-Jul-26 | A/Costa Rica/4700/2013   | Laboratorio Nacional de Influenza                        | Centers for Disease Control and Prevention                  |
| EPI485785 | PB1 | United States | 2013-Oct-09 | A/Louisiana/08/2013      | Louisiana Department of Health and Hospitals             | Centers for Disease Control and Prevention                  |
| EPI485777 | PB1 | United States | 2013-Oct-07 | A/Louisiana/07/2013      | Louisiana Department of Health and Hospitals             | Centers for Disease Control and Prevention                  |
| EPI485579 | PB1 | Cambodia      | 2013-Jan-25 | A/Cambodia/X0125302/2013 | Institut Pasteur in Cambodia                             | Institut Pasteur in Cambodia                                |
| EPI484689 | PB1 | Sweden        | 2009-Sep-02 | A/Umea/4/2009/           |                                                          | Swedish National Institute for Communicable Disease Control |
| EPI484681 | PB1 | Sweden        | 2011-Oct-06 | A/Stockholm/26/2011      |                                                          | Swedish National Institute for Communicable Disease Control |
| EPI484673 | PB1 | Sweden        | 2012-Mar-11 | A/Stockholm/14/2012      |                                                          | Swedish National Institute for Communicable Disease Control |
| EPI484665 | PB1 | Sweden        | 2011-Dec-28 | A/Stockholm/43/2011      |                                                          | Swedish National Institute for Communicable Disease Control |
| EPI484657 | PB1 | Sweden        | 2012-Jan-12 | A/Stockholm/12/2012      |                                                          | Swedish National Institute for Communicable Disease Control |
| EPI484649 | PB1 | Sweden        | 2011-Oct-31 | A/Stockholm/29/2011      |                                                          | Swedish National Institute for Communicable Disease Control |
| EPI484641 | PB1 | Sweden        | 2012-Apr-14 | A/Stockholm/19/2012      |                                                          | Swedish National Institute for Communicable Disease Control |
| EPI484633 | PB1 | Sweden        | 2011-Dec-26 | A/Stockholm/42/2011      |                                                          | Swedish National Institute for Communicable Disease Control |
| EPI484625 | PB1 | Sweden        | 2012-Jan-02 | A/Stockholm/1/2012       |                                                          | Swedish National Institute for Communicable Disease Control |
| EPI484617 | PB1 | Sweden        | 2010-Dec-13 | A/Stockholm/13/2010      |                                                          | Swedish National Institute for Communicable Disease Control |
| EPI484609 | PB1 | Sweden        | 2009-Jun-11 | A/Stockholm/45/2009      |                                                          | Swedish National Institute for Communicable Disease Control |
| EPI484571 | PB1 | Bangladesh    | 2013-May-07 | A/Bangladesh/9334/2013   | Institute of Epidemiology Disease Control and Prevention | Centers for Disease Control and Prevention                  |
| EPI484563 | PB1 | United States | 2013-Jul-14 | A/Georgia/03/2013        | Georgia Public Health Laboratory                         | Centers for Disease Control and Prevention                  |
| EPI484735 | PB1 | Costa Rica    | 2013-Jul-23 | A/Costa Rica/4009/2013   | Laboratorio Nacional de Influenza                        | Centers for Disease Control and Prevention                  |
| EPI484550 | PB1 | Costa Rica    | 2013-Jul-23 | A/Costa Rica/4009/2013   | Laboratorio Nacional de Influenza                        | Centers for Disease Control and Prevention                  |
| EPI484539 | PB1 | United States | 2013-Jul-10 | A/Massachusetts/11/2013  | Massachusetts Department of Public Health                | Centers for Disease Control and Prevention                  |
| EPI484522 | PB1 | Kenya         | 2013-Apr-29 | A/Kenya/118/2013         | CDC-Kenya                                                | Centers for Disease Control and Prevention                  |
| EPI484514 | PB1 | United States | 2013-Aug-15 | A/Arkansas/13/2013       | Arkansas Department of Health                            | Centers for Disease Control and Prevention                  |
| EPI484420 | PB1 | Sweden        | 2013-Mar-22 | A/Sweden/137/2013        |                                                          | Swedish National Institute for Communicable Disease Control |
| EPI484412 | PB1 | Sweden        | 2013-Mar-10 | A/Sweden/136/2013        |                                                          | Swedish National Institute for Communicable Disease Control |
| EPI484404 | PB1 | Sweden        | 2013-Feb-24 | A/Sweden/135/2013        |                                                          | Swedish National Institute for Communicable Disease Control |
| EPI484396 | PB1 | Sweden        | 2013-Feb-22 | A/Sweden/134/2013        |                                                          | Swedish National Institute for Communicable Disease Control |
| EPI484388 | PB1 | Sweden        | 2013-Feb-18 | A/Sweden/133/2013        |                                                          | Swedish National Institute for Communicable Disease Control |
| EPI484380 | PB1 | Sweden        | 2013-Feb-15 | A/Sweden/132/2013        |                                                          | Swedish National Institute for Communicable Disease Control |

Supplementary Table 1

|           |     |               |             |                            |                                        |                                                                  |
|-----------|-----|---------------|-------------|----------------------------|----------------------------------------|------------------------------------------------------------------|
| EPI484372 | PB1 | Sweden        | 2013-Feb-15 | A/Sweden/131/2013          |                                        | Swedish National Institute for Communicable Disease Control      |
| EPI484364 | PB1 | Sweden        | 2013-Feb-12 | A/Sweden/130/2013          |                                        | Swedish National Institute for Communicable Disease Control      |
| EPI484356 | PB1 | Sweden        | 2013-Feb-11 | A/Sweden/129/2013          |                                        | Swedish National Institute for Communicable Disease Control      |
| EPI484348 | PB1 | Sweden        | 2013-Feb-05 | A/Sweden/128/2013          |                                        | Swedish National Institute for Communicable Disease Control      |
| EPI484340 | PB1 | Sweden        | 2013-Jan-31 | A/Sweden/127/2013          |                                        | Swedish National Institute for Communicable Disease Control      |
| EPI484332 | PB1 | Sweden        | 2013-Jan-28 | A/Sweden/126/2013          |                                        | Swedish National Institute for Communicable Disease Control      |
| EPI484324 | PB1 | Sweden        | 2013-Jan-22 | A/Sweden/125/2013          |                                        | Swedish National Institute for Communicable Disease Control      |
| EPI484316 | PB1 | Sweden        | 2013-Jan-23 | A/Sweden/124/2013          |                                        | Swedish National Institute for Communicable Disease Control      |
| EPI484308 | PB1 | Sweden        | 2013-Jan-18 | A/Sweden/123/2013          |                                        | Swedish National Institute for Communicable Disease Control      |
| EPI484300 | PB1 | Sweden        | 2013-Jan-16 | A/Sweden/122/2013          |                                        | Swedish National Institute for Communicable Disease Control      |
| EPI484284 | PB1 | Sweden        | 2013-Jan-11 | A/Sweden/121/2013          | Swedish Institute for Infectious Dis   | Swedish National Institute for Communicable Disease Control      |
| EPI484277 | PB1 | Sweden        | 2013-Jan-17 | A/Sweden/120/2013          | Swedish Institute for Infectious Dis   | Swedish National Institute for Communicable Disease Control      |
| EPI484269 | PB1 | Sweden        | 2013-Jan-13 | A/Sweden/119/2013          | Swedish Institute for Infectious Dis   | Swedish National Institute for Communicable Disease Control      |
| EPI484261 | PB1 | Sweden        | 2013-Jan-07 | A/Sweden/118/2013          | Swedish Institute for Infectious Dis   | Swedish National Institute for Communicable Disease Control      |
| EPI484253 | PB1 | Sweden        | 2013-Jan-03 | A/Sweden/117/2013          | Swedish Institute for Infectious Dis   | Swedish National Institute for Communicable Disease Control      |
| EPI484245 | PB1 | Sweden        | 2012-Dec-27 | A/Sweden/35/2012           | Swedish Institute for Infectious Dis   | Swedish National Institute for Communicable Disease Control      |
| EPI484238 | PB1 | Sweden        | 2012-Dec-25 | A/Sweden/34/2012           | Swedish Institute for Infectious Dis   | Swedish National Institute for Communicable Disease Control      |
| EPI484230 | PB1 | Sweden        | 2012-Dec-23 | A/Sweden/33/2012           | Swedish Institute for Infectious Dis   | Swedish National Institute for Communicable Disease Control      |
| EPI484222 | PB1 | Sweden        | 2012-Dec-20 | A/Sweden/32/2012           | Swedish Institute for Infectious Dis   | Swedish National Institute for Communicable Disease Control      |
| EPI484216 | PB1 | Sweden        | 2012-Dec-20 | A/Sweden/31/2012           |                                        | Swedish National Institute for Communicable Disease Control      |
| EPI482823 | PB1 | United States | 2013-Oct-01 | A/Iowa/04/2013             | Iowa State Hygienic Laboratory         | Centers for Disease Control and Prevention                       |
| EPI482797 | PB1 | United States | 2009-Feb-13 | A/Iowa/02/2009             | Iowa State Hygienic Laboratory         | Centers for Disease Control and Prevention                       |
| EPI482783 | PB1 | United States | 2013-Sep-06 | A/Arkansas/15/2013         | Arkansas Department of Health          | Centers for Disease Control and Prevention                       |
| EPI477632 | PB1 | Australia     | 2013-Mar-11 | A/TOWNSVILLE/23/2013       |                                        | WHO Collaborating Centre for Reference and Research on Influenza |
| EPI477501 | PB1 | Australia     | 2013-Feb-09 | A/TOWNSVILLE/5/2013        | Queensland Health Scientific Servid    | WHO Collaborating Centre for Reference and Research on Influenza |
| EPI477493 | PB1 | Australia     | 2013-Mar-04 | A/SYDNEY/506/2013          | Prince of Wales Hospital               | WHO Collaborating Centre for Reference and Research on Influenza |
| EPI477485 | PB1 | Sri Lanka     | 2013-May-04 | A/SRI LANKA/30/2013        | Medical Research Institute             | WHO Collaborating Centre for Reference and Research on Influenza |
| EPI477477 | PB1 | Sri Lanka     | 2013-Feb-27 | A/SRI LANKA/27/2013        | Medical Research Institute             | WHO Collaborating Centre for Reference and Research on Influenza |
| EPI477469 | PB1 | Australia     | 2013-Mar-26 | A/DARWIN/56/2013           | Royal Darwin Hospital                  | WHO Collaborating Centre for Reference and Research on Influenza |
| EPI477447 | PB1 | China         | 2013-Oct-14 | A/Zhejiang/DTID-ZJU10/2013 | The First Affiliated Hospital, College | Shanghai Zhijiang Biotechnology Co.,Ltd                          |
| EPI477408 | PB1 | China         | 2013-Oct-14 | A/Zhejiang/22/2013         | Zhejiang Provincial Center for Disea   | Zhejiang Provincial Center for Disease Control and Prevention    |
| EPI477400 | PB1 | China         | 2013-Apr-24 | A/Zhejiang/20/2013         | Zhejiang Provincial Center for Disea   | Zhejiang Provincial Center for Disease Control and Prevention    |
| EPI471100 | PB1 | United States | 2013-Sep-06 | A/Arkansas/14/2013         | Arkansas Department of Health          | Centers for Disease Control and Prevention                       |
| EPI467446 | PB1 | Australia     | 2013-Jun-17 | A/Victoria/505/2013        | WHO Collaborating Centre for Refe      | Centers for Disease Control and Prevention                       |

Supplementary Table 1

|           |     |                        |             |                                |                                                                               |                                                  |
|-----------|-----|------------------------|-------------|--------------------------------|-------------------------------------------------------------------------------|--------------------------------------------------|
| EPI467438 | PB1 | American Samoa         | 2013-Feb-22 | A/American Samoa/4786/2013     | State of Hawaii Department of Health                                          | Centers for Disease Control and Prevention       |
| EPI467264 | PB1 | Australia              | 2013-May-23 | A/South Australia/17/2013      | WHO Collaborating Centre for Reference and Surveillance on Influenza          | Centers for Disease Control and Prevention       |
| EPI467216 | PB1 | United States          | 2013-Aug-21 | A/Indiana/21/2013              | Indiana State Department of Health                                            | Centers for Disease Control and Prevention       |
| EPI499463 | PB1 | Japan                  | 2013-May-29 | A/SHIZUOKA-C/99/2013           | Shizuoka City Institute of Environmental Health Science                       | National Institute of Infectious Diseases (NIID) |
| EPI468084 | PB1 | Puerto Rico            | 2013-Jun-14 | A/Puerto Rico/01/2013          | Puerto Rico Department of Health                                              | Centers for Disease Control and Prevention       |
| EPI466903 | PB1 | American Samoa         | 2013-Feb-22 | A/American Samoa/4786/2013     | State of Hawaii Department of Health                                          | Centers for Disease Control and Prevention       |
| EPI466895 | PB1 | Bolivia, Plurinational | 2013-Jun-08 | A/Bolivia/559/2013             | Instituto Nacional de Laboratorios de Referencia                              | Centers for Disease Control and Prevention       |
| EPI466887 | PB1 | Ukraine                | 2013-Apr-06 | A/Ukraine/387/2013             | Institute of Epidemiology and Infectious Diseases                             | Centers for Disease Control and Prevention       |
| EPI466872 | PB1 | Dominican Republic     | 2013-May-01 | A/Dominican Republic/7293/2013 | Laboratorio de Investigacion / Centro de Referencia y Vigilancia de Influenza | Centers for Disease Control and Prevention       |
| EPI466864 | PB1 | United States          | 2013-Mar-06 | A/Maryland/04/2013             | Maryland Department of Health and General Services                            | Centers for Disease Control and Prevention       |
| EPI466850 | PB1 | Ukraine                | 2013-Mar-20 | A/Zaporizza/417/2013           | Institute of Epidemiology and Infectious Diseases                             | Centers for Disease Control and Prevention       |
| EPI466843 | PB1 | Brazil                 | 2013-May-22 | A/Brazil/0328/2013             | Instituto Adolfo Lutz                                                         | Centers for Disease Control and Prevention       |
| EPI466835 | PB1 | Bolivia, Plurinational | 2013-Jun-08 | A/Bolivia/559/2013             | Instituto Nacional de Laboratorios de Referencia                              | Centers for Disease Control and Prevention       |
| EPI466827 | PB1 | United States          | 2013-Jul-05 | A/Utah/07/2013                 | Utah Department of Health                                                     | Centers for Disease Control and Prevention       |
| EPI468081 | PB1 | Dominican Republic     | 2013-May-01 | A/Dominican Republic/7293/2013 | Laboratorio de Investigacion / Centro de Referencia y Vigilancia de Influenza | Centers for Disease Control and Prevention       |
| EPI466813 | PB1 | Haiti                  | 2013-Jun-02 | A/Haiti/1790/2013              | Caribbean Epidemiology Center                                                 | Centers for Disease Control and Prevention       |
| EPI466055 | PB1 | Finland                | 2009-Nov-15 | A/Finland/722/2009(H1N1)       | Helsingin-Uusimaa Labotariokeskus                                             | Institute for Molecular Medicine Finland (FIMM)  |
| EPI466047 | PB1 | Finland                | 2009-Nov-12 | A/Finland/721/2009(H1N1)       | Helsingin-Uusimaa Labotariokeskus                                             | Institute for Molecular Medicine Finland (FIMM)  |
| EPI466039 | PB1 | Finland                | 2009-Nov-12 | A/Finland/720/2009(H1N1)       | Helsingin-Uusimaa Labotariokeskus                                             | Institute for Molecular Medicine Finland (FIMM)  |
| EPI466031 | PB1 | Finland                | 2009-Nov-12 | A/Finland/719/2009(H1N1)       | Helsingin-Uusimaa Labotariokeskus                                             | Institute for Molecular Medicine Finland (FIMM)  |
| EPI466023 | PB1 | Finland                | 2009-Nov-11 | A/Finland/718/2009(H1N1)       | Helsingin-Uusimaa Labotariokeskus                                             | Institute for Molecular Medicine Finland (FIMM)  |
| EPI466015 | PB1 | Finland                | 2009-Nov-11 | A/Finland/717/2009(H1N1)       | Helsingin-Uusimaa Labotariokeskus                                             | Institute for Molecular Medicine Finland (FIMM)  |
| EPI466007 | PB1 | Finland                | 2009-Oct-26 | A/Finland/716/2009(H1N1)       | Helsingin-Uusimaa Labotariokeskus                                             | Institute for Molecular Medicine Finland (FIMM)  |
| EPI465999 | PB1 | Finland                | 2009-Dec-14 | A/Finland/715/2009(H1N1)       | Ita-Suomen Labotariokeskus                                                    | Institute for Molecular Medicine Finland (FIMM)  |
| EPI465991 | PB1 | Finland                | 2009-Nov-23 | A/Finland/714/2009(H1N1)       | Ita-Suomen Labotariokeskus                                                    | Institute for Molecular Medicine Finland (FIMM)  |
| EPI465983 | PB1 | Finland                | 2009-Nov-06 | A/Finland/713/2009(H1N1)       | Ita-Suomen Labotariokeskus                                                    | Institute for Molecular Medicine Finland (FIMM)  |
| EPI465371 | PB1 | United States          | 2013-Aug-03 | A/Indiana/11/2013              | Indiana State Department of Health                                            | Centers for Disease Control and Prevention       |
| EPI465363 | PB1 | United States          | 2013-Jul-29 | A/Illinois/03/2013             | Illinois Department of Public Health                                          | Centers for Disease Control and Prevention       |
| EPI464868 | PB1 | United States          | 2013-Jul-22 | A/Ohio/05/2013                 | Ohio Department of Health Laboratory                                          | Centers for Disease Control and Prevention       |
| EPI464509 | PB1 | United States          | 2013-Jul-16 | A/Indiana/10/2013              | Indiana State Department of Health                                            | Centers for Disease Control and Prevention       |
| EPI461881 | PB1 | United States          | 2013-Jul-01 | A/Indiana/09/2013              | Indiana State Department of Health                                            | Centers for Disease Control and Prevention       |
| EPI499458 | PB1 | Japan                  | 2013-Apr-17 | A/HIROSHIMA/19/2013            | Center for Public Health and Environmental Health Sciences                    | National Institute of Infectious Diseases (NIID) |
| EPI460821 | PB1 | Peru                   | 2013-Apr-19 | A/Peru/106/2013                | US NAMRU-6                                                                    | Centers for Disease Control and Prevention       |
| EPI460773 | PB1 | China                  | 2013-Apr-25 | A/Nanjing/5/2013               |                                                                               | institute of microbiology                        |



Supplementary Table 1

|           |     |               |             |                           |                                                                       |                                                                  |
|-----------|-----|---------------|-------------|---------------------------|-----------------------------------------------------------------------|------------------------------------------------------------------|
| EPI460765 | PB1 | China         | 2013-Apr-19 | A/Nanjing/3/2013          | Jiangsu Provincial Center for Disease Control and Prevention          | institute of microbiology                                        |
| EPI460749 | PB1 | China         | 2013-Apr-09 | A/Nanjing/f0874/2013      | Jiangsu Provincial Center for Disease Control and Prevention          | institute of microbiology                                        |
| EPI460740 | PB1 | United States | 2013-Jun-20 | A/Indiana/04/2013         | Indiana State Department of Health                                    | Centers for Disease Control and Prevention                       |
| EPI459853 | PB1 | Taiwan        | 2013-May-07 | A/Taiwan/2/2013           | National Influenza Center, Centers for Disease Control and Prevention | Taiwan CDC                                                       |
| EPI451329 | PB1 | China         | 2013-May-01 | A/Shanghai/Patient5/2013  | Shanghai public health clinical center                                | Institute Pasteur of Shanghai, CAS                               |
| EPI451281 | PB1 | China         | 2013-May-01 | A/Shanghai/Patient3/2013  | Shanghai public health clinical center                                | Institute Pasteur of Shanghai, CAS                               |
| EPI451270 | PB1 | China         | 2013-May-01 | A/Shanghai/Patient6/2013  | Shanghai public health clinical center                                | Institute Pasteur of Shanghai, CAS                               |
| EPI451260 | PB1 | China         | 2013-May-01 | A/Shanghai/Patient14/2013 | Shanghai public health clinical center                                | Institute Pasteur of Shanghai, CAS                               |
| EPI451251 | PB1 | China         | 2013-May-01 | A/Shanghai/Patient2/2013  | Shanghai public health clinical center                                | Institute Pasteur of Shanghai, CAS                               |
| EPI451016 | PB1 |               | 2013-May-01 | A/Shanghai/patient1/2013  | Shanghai public health clinical center                                | Institute Pasteur of Shanghai, CAS                               |
| EPI453648 | PB1 | China         | 2013-Apr-26 | A/Nanjing/M2/2013         | Jiangsu Provincial Center for Disease Control and Prevention          | institute of microbiology                                        |
| EPI456673 | PB1 | China         | 2013-Apr-26 | A/Nanjing/M1/2013         | Jiangsu Provincial Center for Disease Control and Prevention          | institute of microbiology                                        |
| EPI450291 | PB1 | Australia     | 2013-Jan-09 | A/SOUTH AUSTRALIA/2/2013  | Institute of Medical and Veterinary Science                           | WHO Collaborating Centre for Reference and Research on Influenza |
| EPI450280 | PB1 | Thailand      | 2012-Dec-03 | A/SONG KHLA/416/2012      | WHO National Influenza Centre, Nakhon Phanom                          | WHO Collaborating Centre for Reference and Research on Influenza |
| EPI450263 | PB1 | Australia     | 2012-Dec-24 | A/PERTH/298/2012          | Pathwest QE II Medical Centre                                         | WHO Collaborating Centre for Reference and Research on Influenza |
| EPI0      | PB1 | Australia     | 2013-Jan-14 | A/NEWCASTLE/1/2013        | John Hunter Hospital, Virology Unit                                   | WHO Collaborating Centre for Reference and Research on Influenza |
| EPI450226 | PB1 | Australia     | 2013-Jan-07 | A/BRISBANE/6/2013         | Queensland Health Scientific Services                                 | WHO Collaborating Centre for Reference and Research on Influenza |
| EPI448093 | PB1 | Bangladesh    | 2011-Mar-07 | A/Bangladesh/5487/2011    | Institute of Epidemiology Disease Control and Prevention              | Centers for Disease Control and Prevention                       |
| EPI447636 | PB1 | China         | 2013-Apr-21 | A/Anhui/03/2013           |                                                                       | WHO Chinese National Influenza Center                            |
| EPI447643 | PB1 | China         | 2013-Apr-14 | A/Anhui/02/2013           |                                                                       | WHO Chinese National Influenza Center                            |
| EPI447657 | PB1 | China         | 2013-Apr-09 | A/Jiangsu/09/2013         |                                                                       | WHO Chinese National Influenza Center                            |
| EPI447664 | PB1 | China         | 2013-Apr-11 | A/Jiangsu/08/2013         |                                                                       | WHO Chinese National Influenza Center                            |
| EPI447671 | PB1 | China         | 2013-Apr-03 | A/Jiangsu/07/2013         |                                                                       | WHO Chinese National Influenza Center                            |
| EPI447678 | PB1 | China         | 2013-Apr-10 | A/Jiangsu/06/2013         |                                                                       | WHO Chinese National Influenza Center                            |
| EPI447685 | PB1 | China         | 2013-Apr-08 | A/Jiangsu/05/2013         |                                                                       | WHO Chinese National Influenza Center                            |
| EPI447692 | PB1 | China         | 2013-Apr-25 | A/Hunan/02/2013           |                                                                       | WHO Chinese National Influenza Center                            |
| EPI447699 | PB1 | China         | 2013-Apr-24 | A/Hunan/01/2013           |                                                                       | WHO Chinese National Influenza Center                            |
| EPI447706 | PB1 | China         | 2013-Apr-24 | A/Jiangxi/01/2013         |                                                                       | WHO Chinese National Influenza Center                            |
| EPI447713 | PB1 | China         | 2013-Apr-23 | A/Fujian/01/2013          |                                                                       | WHO Chinese National Influenza Center                            |
| EPI447720 | PB1 | China         | 2013-Apr-21 | A/Shandong/01/2013        |                                                                       | WHO Chinese National Influenza Center                            |
| EPI447727 | PB1 | China         | 2013-Apr-16 | A/Henan/01/2013           |                                                                       | WHO Chinese National Influenza Center                            |
| EPI447734 | PB1 | China         | 2013-Apr-10 | A/Shanghai/16/2013        |                                                                       | WHO Chinese National Influenza Center                            |
| EPI447741 | PB1 | China         | 2013-Apr-09 | A/Shanghai/15/2013        |                                                                       | WHO Chinese National Influenza Center                            |
| EPI447748 | PB1 | China         | 2013-Apr-03 | A/Zhejiang/02/2013        |                                                                       | WHO Chinese National Influenza Center                            |

Supplementary Table 1

|           |     |             |             |                           |                                            |                                            |
|-----------|-----|-------------|-------------|---------------------------|--------------------------------------------|--------------------------------------------|
| EPI447755 | PB1 | China       | 2013-Apr-08 | A/Shanghai/9/2013         |                                            | WHO Chinese National Influenza Center      |
| EPI447762 | PB1 | China       | 2013-Apr-07 | A/Shanghai/8/2013         |                                            | WHO Chinese National Influenza Center      |
| EPI447769 | PB1 | China       | 2013-Apr-03 | A/Shanghai/17/2013        |                                            | WHO Chinese National Influenza Center      |
| EPI447777 | PB1 | China       | 2013-Apr-10 | A/Shanghai/14/2013        |                                            | WHO Chinese National Influenza Center      |
| EPI447784 | PB1 | China       | 2013-Apr-10 | A/Shanghai/13/2013        |                                            | WHO Chinese National Influenza Center      |
| EPI447793 | PB1 | China       | 2013-Apr-10 | A/Shanghai/12/2013        |                                            | WHO Chinese National Influenza Center      |
| EPI447801 | PB1 | China       | 2013-Apr-10 | A/Shanghai/11/2013        |                                            | WHO Chinese National Influenza Center      |
| EPI447809 | PB1 | China       | 2013-Apr-09 | A/Shanghai/10/2013        |                                            | WHO Chinese National Influenza Center      |
| EPI447822 | PB1 | China       | 2013-Apr-10 | A/Shanghai/06-A/2013      |                                            | WHO Chinese National Influenza Center      |
| EPI447836 | PB1 | China       | 2013-Apr-12 | A/Beijing/01-A/2013       |                                            | WHO Chinese National Influenza Center      |
| EPI447850 | PB1 | China       | 2013-Apr-05 | A/Jiangsu/04/2013         |                                            | WHO Chinese National Influenza Center      |
| EPI447863 | PB1 | China       | 2013-Apr-06 | A/jiangsu/03/2013         |                                            | WHO Chinese National Influenza Center      |
| EPI447876 | PB1 | China       | 2013-Mar-31 | A/Jiangsu/02/2013         |                                            | WHO Chinese National Influenza Center      |
| EPI447897 | PB1 | China       | 2013-Mar-18 | A/Shanghai/07/2013        |                                            | WHO Chinese National Influenza Center      |
| EPI447910 | PB1 | China       | 2013-Apr-02 | A/shanghai/05/2013        |                                            | WHO Chinese National Influenza Center      |
| EPI447920 | PB1 | China       | 2013-Mar-30 | A/Jiangsu/01/2013         |                                            | WHO Chinese National Influenza Center      |
| EPI447183 | PB1 | Russian Fed | 2013-Mar-20 | A/St. Petersburg/151/2013 | Russian Academy of Medical Sciences        | Centers for Disease Control and Prevention |
| EPI446153 | PB1 | Kenya       | 2010-Jun-12 | A/Nairobi/97/2010         | ARI Unit, Kenya Medical Research Institute | Kenya Medical Research Institute           |
| EPI446140 | PB1 | Kenya       | 2010-Jun-04 | A/Nairobi/80/2010         | ARI Unit, Kenya Medical Research Institute | Kenya Medical Research Institute           |
| EPI446132 | PB1 | Kenya       | 2010-Jun-04 | A/Nairobi/72/2010         | ARI Unit, Kenya Medical Research Institute | Kenya Medical Research Institute           |
| EPI446124 | PB1 | Kenya       | 2010-Mar-25 | A/Nairobi/25/2010         | ARI Unit, Kenya Medical Research Institute | Kenya Medical Research Institute           |
| EPI446116 | PB1 | Kenya       | 2010-Mar-25 | A/Nairobi/24/2010         | ARI Unit, Kenya Medical Research Institute | Kenya Medical Research Institute           |
| EPI446108 | PB1 | Kenya       | 2010-Mar-20 | A/Nairobi/21/2010         | ARI Unit, Kenya Medical Research Institute | Kenya Medical Research Institute           |
| EPI446100 | PB1 | Kenya       | 2010-Mar-20 | A/Nairobi/20/2010         | ARI Unit, Kenya Medical Research Institute | Kenya Medical Research Institute           |
| EPI446092 | PB1 | Kenya       | 2010-Jan-21 | A/Kijabe/16/2010          | ARI Unit, Kenya Medical Research Institute | Kenya Medical Research Institute           |
| EPI446084 | PB1 | Kenya       | 2010-Mar-12 | A/Nairobi/11/2010         | ARI Unit, Kenya Medical Research Institute | Kenya Medical Research Institute           |
| EPI446076 | PB1 | Kenya       | 2009-Dec-09 | A/Nairobi/16/2009         | ARI Unit, Kenya Medical Research Institute | Kenya Medical Research Institute           |
| EPI446069 | PB1 | Kenya       | 2009-Nov-04 | A/Nairobi/3/2009          | ARI Unit, Kenya Medical Research Institute | Kenya Medical Research Institute           |
| EPI446062 | PB1 | Kenya       | 2009-Oct-27 | A/Kikuyu/185/2009         | ARI Unit, Kenya Medical Research Institute | Kenya Medical Research Institute           |
| EPI446055 | PB1 | Kenya       | 2009-Oct-27 | A/Kikuyu/184/2009         | ARI Unit, Kenya Medical Research Institute | Kenya Medical Research Institute           |
| EPI446048 | PB1 | Kenya       | 2009-Oct-12 | A/Kisii/115/2009          | ARI Unit, Kenya Medical Research Institute | Kenya Medical Research Institute           |
| EPI446041 | PB1 | Kenya       | 2009-Oct-15 | A/Kisii/143/2009          | ARI Unit, Kenya Medical Research Institute | Kenya Medical Research Institute           |
| EPI446034 | PB1 | Kenya       | 2009-Oct-29 | A/Kisii/205/2009          | ARI Unit, Kenya Medical Research Institute | Kenya Medical Research Institute           |
| EPI446027 | PB1 | Kenya       | 2009-Oct-29 | A/Kakamega/215/2009       | ARI Unit, Kenya Medical Research Institute | Kenya Medical Research Institute           |

Supplementary Table 1

|           |     |              |             |                        |                                      |                                                               |
|-----------|-----|--------------|-------------|------------------------|--------------------------------------|---------------------------------------------------------------|
| EPI446018 | PB1 | Kenya        | 2009-Oct-03 | A/Nairobi/37/2009      | ARI Unit, Kenya Medical Research I   | Kenya Medical Research Institute                              |
| EPI446010 | PB1 | Kenya        | 2009-Oct-02 | A/Mombasa/27/2009      | ARI Unit, Kenya Medical Research I   | Kenya Medical Research Institute                              |
| EPI445994 | PB1 | Bangladesh   | 2011-Feb-26 | A/Bangladesh/0994/2011 | Institute of Epidemiology Disease C  | Centers for Disease Control and Prevention                    |
| EPI445910 | PB1 | Taiwan       | 2013-Apr-24 | A/Taiwan/1/2013        | National Influenza Center, Centers   | Taiwan CDC                                                    |
| EPI447190 | PB1 | United State | 2012-Oct-20 | A/New York/39/2012     | New York State Department of Hea     | Centers for Disease Control and Prevention                    |
| EPI445652 | PB1 | United State | 2013-Feb-20 | A/Alaska/02/2013       | Alaska State Virology Lab            | Centers for Disease Control and Prevention                    |
| EPI443732 | PB1 | United State | 2013-Feb-20 | A/Alaska/02/2013       | Alaska State Virology Lab            | Centers for Disease Control and Prevention                    |
| EPI443707 | PB1 | United State | 2013-Jan-07 | A/Washington/07/2013   | Spokane Regional Health District     | Centers for Disease Control and Prevention                    |
| EPI443695 | PB1 | United State | 2003-Feb-13 | A/Wyoming/03/2003      | Iowa State Hygienic Laboratory       | Centers for Disease Control and Prevention                    |
| EPI443283 | PB1 | Kenya        | 2009-Oct-08 | A/Mombasa/91/2009      | ARI Unit, Kenya Medical Research I   | Kenya Medical Research Institute                              |
| EPI443276 | PB1 | Kenya        | 2009-Oct-16 | A/Mombasa/148/2009     | ARI Unit, Kenya Medical Research I   | Kenya Medical Research Institute                              |
| EPI443269 | PB1 | Kenya        | 2009-Oct-27 | A/Mombasa/179/2009     | ARI Unit, Kenya Medical Research I   | Kenya Medical Research Institute                              |
| EPI443261 | PB1 | Kenya        | 2009-Oct-22 | A/Trans-Nzoia/168/2009 | ARI Unit, Kenya Medical Research I   | Kenya Medical Research Institute                              |
| EPI443253 | PB1 | Kenya        | 2010-Oct-27 | A/Nakuru/192/2009      | ARI Unit, Kenya Medical Research I   | Kenya Medical Research Institute                              |
| EPI443246 | PB1 | Kenya        | 2009-Sep-29 | A/Mombasa/512/2009     | ARI Unit, Kenya Medical Research I   | Kenya Medical Research Institute                              |
| EPI443239 | PB1 | Kenya        | 2009-Jul-30 | A/Kitale/532/2009      | ARI Unit, Kenya Medical Research I   | Kenya Medical Research Institute                              |
| EPI443231 | PB1 | Kenya        | 2009-Sep-30 | A/Kitale/531/2009      | ARI Unit, Kenya Medical Research I   | Kenya Medical Research Institute                              |
| EPI443224 | PB1 | Kenya        | 2009-Sep-29 | A/Meru/467/2009        | ARI Unit, Kenya Medical Research I   | Kenya Medical Research Institute                              |
| EPI443217 | PB1 | Kenya        | 2009-Sep-29 | A/Nyeri/478/2009       | ARI Unit, Kenya Medical Research I   | Kenya Medical Research Institute                              |
| EPI443210 | PB1 | Kenya        | 2009-Sep-22 | A/Embu/169/2009        | ARI Unit, Kenya Medical Research I   | Kenya Medical Research Institute                              |
| EPI443203 | PB1 | Kenya        | 2009-Sep-19 | A/Eldoret/120/2009     | ARI Unit, Kenya Medical Research I   | Kenya Medical Research Institute                              |
| EPI443196 | PB1 | Kenya        | 2009-Sep-24 | A/Eldoret/119/2009     | ARI Unit, Kenya Medical Research I   | Kenya Medical Research Institute                              |
| EPI443189 | PB1 | Kenya        | 2009-Sep-24 | A/Malindi/238/2009     | ARI Unit, Kenya Medical Research I   | Kenya Medical Research Institute                              |
| EPI443182 | PB1 | Kenya        | 2009-Sep-15 | A/Nairobi/59/2009      | ARI Unit, Kenya Medical Research I   | Kenya Medical Research Institute                              |
| EPI443174 | PB1 | Kenya        | 2009-Sep-15 | A/Nairobi/58/2009      | ARI Unit, Kenya Medical Research I   | Kenya Medical Research Institute                              |
| EPI443167 | PB1 | Kenya        | 2009-Jul-05 | A/Keiyo/96/2009        | ARI Unit, Kenya Medical Research I   | Kenya Medical Research Institute                              |
| EPI443157 | PB1 | Kenya        | 2009-Jul-05 | A/Garissa/78/2009      | ARI Unit, Kenya Medical Research I   | Kenya Medical Research Institute                              |
| EPI443112 | PB1 | Kenya        | 2009-Jul-03 | A/Nairobi/64/2009      | ARI Unit, Kenya Medical Research I   | Kenya Medical Research Institute                              |
| EPI443065 | PB1 | Kenya        | 2009-Jul-02 | A/Kisumu/61/2009       | ARI Unit, Kenya Medical Research I   | Kenya Medical Research Institute                              |
| EPI443040 | PB1 | China        | 2013-Apr-03 | A/Zhejiang/2/2013      | Zhejiang Provincial Center for Disea | Zhejiang Provincial Center for Disease Control and Prevention |
| EPI443032 | PB1 | China        | 2013-Mar-24 | A/Zhejiang/1/2013      | Zhejiang Provincial Center for Disea | Zhejiang Provincial Center for Disease Control and Prevention |
| EPI447942 | PB1 | China        | 2013-Mar-25 | A/Zhejiang/01/2013     |                                      | WHO Chinese National Influenza Center                         |
| EPI447950 | PB1 | China        | 2013-Mar-09 | A/Shanghai/4/2013      |                                      | WHO Chinese National Influenza Center                         |
| EPI447960 | PB1 | China        | 2013-Feb-27 | A/Shanghai/3/2013      |                                      | WHO Chinese National Influenza Center                         |

Supplementary Table 1

|           |     |              |             |                                        |                                       |                                                                  |
|-----------|-----|--------------|-------------|----------------------------------------|---------------------------------------|------------------------------------------------------------------|
| EPI443015 | PB1 | Kenya        | 2009-Jul-02 | A/Kisumu/56/2009                       | ARI Unit, Kenya Medical Research I    | Kenyatta University                                              |
| EPI446456 | PB1 | China        | 2013-Apr-02 | A/Hangzhou/3/2013                      | Hangzhou Center for Disease Contr     | Hangzhou Center for Disease Control and Prevention               |
| EPI446450 | PB1 | China        | 2013-Mar-25 | A/Hangzhou/2/2013                      | Hangzhou Center for Disease Contr     | Hangzhou Center for Disease Control and Prevention               |
| EPI441600 | PB1 | China        | 2013-Mar-24 | A/Hangzhou/1/2013                      | Hangzhou Center for Disease Contr     | Hangzhou Center for Disease Control and Prevention               |
| EPI439508 | PB1 | China        | 2013-Mar-20 | A/Anhui/1/2013                         |                                       | WHO Chinese National Influenza Center                            |
| EPI439501 | PB1 | China        | 2013-Mar-05 | A/Shanghai/2/2013                      |                                       | WHO Chinese National Influenza Center                            |
| EPI439489 | PB1 | China        | 2013-Feb-26 | A/Shanghai/1/2013                      |                                       | WHO Chinese National Influenza Center                            |
| EPI440007 | PB1 | India        | 2012-Dec-22 | A/India/2192/2012                      | All India Institute of Medical Scienc | Centers for Disease Control and Prevention                       |
| EPI438418 | PB1 | China        | 2012-Dec-12 | A/Hebei-Yuhua/SWL1250/2012 (H1N1       | China National Influenza Centre       | WHO Chinese National Influenza Center                            |
| EPI436259 | PB1 | United State | 2012-Oct-20 | A/New York/39/2012                     | New York State Department of Hea      | Centers for Disease Control and Prevention                       |
| EPI426139 | PB1 | United State | 2012-Oct-20 | A/New York/39/2012                     | New York State Department of Hea      | Centers for Disease Control and Prevention                       |
| EPI420767 | PB1 | China        | 2013-Feb-09 | A/Guizhou/2/2013                       | WHO Chinese National Influenza Ce     | China National Influenza Centre                                  |
| EPI420390 | PB1 | China        | 2013-Feb-08 | A/Guizhou/1/2013                       | WHO Chinese National Influenza Ce     | China National Influenza Centre                                  |
| EPI440008 | PB1 | United State | 2012-Jun-17 | A/Washington/24/2012                   | Washington State Public Health Lab    | Centers for Disease Control and Prevention                       |
| EPI418172 | PB1 | India        | 2012-Dec-22 | A/India/2192/2012                      | All India Institute of Medical Scienc | Centers for Disease Control and Prevention                       |
| EPI418121 | PB1 | China        | 2012-Oct-04 | A/Beijing-Xicheng/12423/2012           | WHO Chinese National Influenza Ce     | Centers for Disease Control and Prevention                       |
| EPI418108 | PB1 | Thailand     | 2012-Oct-02 | A/Chiang Rai/312/2012                  | WHO National Influenza Centre, Na     | Centers for Disease Control and Prevention                       |
| EPI450437 | PB1 | Australia    | 2012-Oct-06 | A/SOUTH AUSTRALIA/162/2012             | Institute of Medical and Veterinary   | WHO Collaborating Centre for Reference and Research on Influenza |
| EPI450412 | PB1 | New Zealan   | 2012-Aug-01 | A/AUCKLAND/64/2012                     | Auckland Hospital                     | WHO Collaborating Centre for Reference and Research on Influenza |
| EPI490085 | PB1 | United State | 2012-Nov-12 | A/Delaware/15/2012                     | Delaware Public Health Lab            | Centers for Disease Control and Prevention                       |
| EPI418016 | PB1 | Australia    | 2011-Oct-24 | A/Victoria/361/2011                    | WHO Collaborating Centre for Refe     | Centers for Disease Control and Prevention                       |
| EPI417229 | PB1 | United State | 2012-Oct-22 | A/Arizona/09/2012                      | Arizona Department of Health Serv     | Centers for Disease Control and Prevention                       |
| EPI416143 | PB1 | United State | 2012-Dec-03 | A/Michigan/33/2012                     | Michigan Department of Communi        | Centers for Disease Control and Prevention                       |
| EPI440093 | PB1 | United State | 2012-Nov-18 | A/Michigan/32/2012                     | Michigan Department of Communi        | Centers for Disease Control and Prevention                       |
| EPI407277 | PB1 | United State | 2012-Nov-13 | A/Minnesota/18/2012                    | Minnesota Department of Health        | Centers for Disease Control and Prevention                       |
| EPI407269 | PB1 | United State | 2012-Nov-13 | A/Minnesota/18/2012                    | Minnesota Department of Health        | Centers for Disease Control and Prevention                       |
| EPI464920 | PB1 | Italy        | 2010-Jan-12 | A/guinea fowl/Italy/10VIR-218-134/20   | Istituto Zooprofilattico Sperimenta   | Istituto Zooprofilattico Sperimentale Delle Venezie              |
| EPI450829 | PB1 | China        | 2013-Apr-04 | A/quail/Hangzhou/35/2013               | Hangzhou Center for Disease Contr     | Hangzhou Center for Disease Control and Prevention               |
| EPI448277 | PB1 | Bangladesh   | 2012-Feb-20 | A/duck/Bangladesh/32077/2012           | Institute of Epidemiology Disease C   | Centers for Disease Control and Prevention                       |
| EPI448269 | PB1 | Bangladesh   | 2012-Jan-08 | A/chicken/Bangladesh/42010/2012        | Institute of Epidemiology Disease C   | Centers for Disease Control and Prevention                       |
| EPI448229 | PB1 | Bangladesh   | 2011-Jun-15 | A/chicken/Bangladesh/11RS-1984-30/2011 |                                       | Centers for Disease Control and Prevention                       |
| EPI448221 | PB1 | Bangladesh   | 2011-Jul-24 | A/duck/Bangladesh/4124T/2011           | Institute of Epidemiology Disease C   | Centers for Disease Control and Prevention                       |
| EPI448213 | PB1 | Bangladesh   | 2011-Jul-24 | A/duck/Bangladesh/4120T/2011           | Institute of Epidemiology Disease C   | Centers for Disease Control and Prevention                       |
| EPI448205 | PB1 | Bangladesh   | 2011-Jul-15 | A/chicken/Bangladesh/4070T/2011        | Institute of Epidemiology Disease C   | Centers for Disease Control and Prevention                       |

Supplementary Table 1

|           |     |            |             |                                   |                                     |                                            |
|-----------|-----|------------|-------------|-----------------------------------|-------------------------------------|--------------------------------------------|
| EPI448197 | PB1 | Bangladesh | 2011-Jul-14 | A/chicken/Bangladesh/4058/2011    | Institute of Epidemiology Disease C | Centers for Disease Control and Prevention |
| EPI448189 | PB1 | Bangladesh | 2011-Jul-01 | A/goose/Bangladesh/4051T/2011     | Institute of Epidemiology Disease C | Centers for Disease Control and Prevention |
| EPI448181 | PB1 | Bangladesh | 2011-May-24 | A/chicken/Bangladesh/3075/2011    | Institute of Epidemiology Disease C | Centers for Disease Control and Prevention |
| EPI448173 | PB1 | Bangladesh | 2011-May-23 | A/chicken/Bangladesh/3072/2011    | Institute of Epidemiology Disease C | Centers for Disease Control and Prevention |
| EPI448165 | PB1 | Bangladesh | 2011-Feb-07 | A/crow/Bangladesh/316T/2011       | Institute of Epidemiology Disease C | Centers for Disease Control and Prevention |
| EPI448157 | PB1 | Bangladesh | 2011-Feb-07 | A/crow/Bangladesh/313T/2011       | Institute of Epidemiology Disease C | Centers for Disease Control and Prevention |
| EPI448149 | PB1 | Bangladesh | 2011-Feb-13 | A/crow/Bangladesh/1056/2011       | Institute of Epidemiology Disease C | Centers for Disease Control and Prevention |
| EPI448141 | PB1 | Bangladesh | 2011-Feb-04 | A/chicken/Bangladesh/11303/2011   | Institute of Epidemiology Disease C | Centers for Disease Control and Prevention |
| EPI448133 | PB1 | Bangladesh | 2011-Feb-07 | A/poultry/Bangladesh/11255-C/2011 | Institute of Epidemiology Disease C | Centers for Disease Control and Prevention |
| EPI448125 | PB1 | Bangladesh | 2011-Feb-20 | A/chicken/Bangladesh/31289-1/2011 | Institute of Epidemiology Disease C | Centers for Disease Control and Prevention |
| EPI448109 | PB1 | Bangladesh | 2011-Jun-29 | A/waterfowl/Bangladesh/33025/2011 | Institute of Epidemiology Disease C | Centers for Disease Control and Prevention |
| EPI448101 | PB1 | Bangladesh | 2011-Mar-20 | A/duck/Bangladesh/1849/2011       | Institute of Epidemiology Disease C | Centers for Disease Control and Prevention |
| EPI448085 | PB1 | Bangladesh | 2010-Jan-12 | A/chicken/Bangladesh/0411/2010    | Institute of Epidemiology Disease C | Centers for Disease Control and Prevention |
| EPI448077 | PB1 | Bangladesh | 2010-Jan-04 | A/chicken/Bangladesh/1012/2010    | Institute of Epidemiology Disease C | Centers for Disease Control and Prevention |
| EPI448069 | PB1 | Bangladesh | 2010-Jan-04 | A/chicken/Bangladesh/0912/2010    | Institute of Epidemiology Disease C | Centers for Disease Control and Prevention |
| EPI448061 | PB1 | Bangladesh | 2011-Feb-15 | A/crow/Bangladesh/1061/2011       | Institute of Epidemiology Disease C | Centers for Disease Control and Prevention |
| EPI448053 | PB1 | Bangladesh | 2011-Feb-13 | A/crow/Bangladesh/1054/2011       | Institute of Epidemiology Disease C | Centers for Disease Control and Prevention |
| EPI448045 | PB1 | Bangladesh | 2011-Jan-20 | A/crow/Bangladesh/1020/2011       | Institute of Epidemiology Disease C | Centers for Disease Control and Prevention |
| EPI448037 | PB1 | Bangladesh | 2011-Jan-20 | A/crow/Bangladesh/1019/2011       | Institute of Epidemiology Disease C | Centers for Disease Control and Prevention |
| EPI448029 | PB1 | Bangladesh | 2011-Jan-20 | A/crow/Bangladesh/1008/2011       | Institute of Epidemiology Disease C | Centers for Disease Control and Prevention |
| EPI425953 | PB1 | Vietnam    | 2011-Sep-07 | A/chicken/Vietnam/NCVD-1038/2011  | National Centre of Veterinary Diagn | Centers for Disease Control and Prevention |
| EPI425945 | PB1 | Vietnam    | 2011-Feb-28 | A/chicken/Vietnam/NCVD-715/2011   | National Centre of Veterinary Diagn | Centers for Disease Control and Prevention |
| EPI425937 | PB1 | Vietnam    | 2012-Aug-22 | A/duck/Vietnam/NCVD-1875/2012     | National Centre of Veterinary Diagn | Centers for Disease Control and Prevention |
| EPI425929 | PB1 | Vietnam    | 2012-Jul-12 | A/duck/Vietnam/NCVD-1544/2012     | National Centre of Veterinary Diagn | Centers for Disease Control and Prevention |
| EPI425921 | PB1 | Vietnam    | 2012-Jul-16 | A/duck/Vietnam/NCVD-1547/2012     | National Centre of Veterinary Diagn | Centers for Disease Control and Prevention |
| EPI425913 | PB1 | Vietnam    | 2012-Feb-24 | A/duck/Vietnam/NCVD-1304/2012     | National Centre of Veterinary Diagn | Centers for Disease Control and Prevention |
| EPI425905 | PB1 | Vietnam    | 2012-Feb-17 | A/chicken/Vietnam/NCVD-1254/2011  | National Centre of Veterinary Diagn | Centers for Disease Control and Prevention |
| EPI425897 | PB1 | Vietnam    | 2012-Feb-16 | A/duck/Vietnam/NCVD-1251/2011     | National Centre of Veterinary Diagn | Centers for Disease Control and Prevention |
| EPI425889 | PB1 | Vietnam    | 2012-Feb-08 | A/duck/Vietnam/NCVD-1212/2012     | National Centre of Veterinary Diagn | Centers for Disease Control and Prevention |
| EPI425881 | PB1 | Vietnam    | 2012-Feb-01 | A/duck/Vietnam/NCVD-1182/2012     | National Centre of Veterinary Diagn | Centers for Disease Control and Prevention |
| EPI425873 | PB1 | Vietnam    | 2012-Jan-01 | A/duck/Vietnam/NCVD-1163/2011     | National Centre of Veterinary Diagn | Centers for Disease Control and Prevention |
| EPI425865 | PB1 | Vietnam    | 2011-Dec-30 | A/duck/Vietnam/NCVD-1162/2011     | National Centre of Veterinary Diagn | Centers for Disease Control and Prevention |
| EPI425857 | PB1 | Vietnam    | 2011-Dec-30 | A/duck/Vietnam/NCVD-1161/2011     | National Centre of Veterinary Diagn | Centers for Disease Control and Prevention |
| EPI425849 | PB1 | Vietnam    | 2011-Nov-26 | A/duck/Vietnam/NCVD3-31/2011      | National Centre of Veterinary Diagn | Centers for Disease Control and Prevention |

Supplementary Table 1

|           |     |         |             |                                  |                                     |                                            |
|-----------|-----|---------|-------------|----------------------------------|-------------------------------------|--------------------------------------------|
| EPI425841 | PB1 | Vietnam | 2011-Nov-26 | A/duck/Vietnam/NCVD3-8/2011      | National Centre of Veterinary Diagn | Centers for Disease Control and Prevention |
| EPI425833 | PB1 | Vietnam | 2011-Oct-31 | A/chicken/Vietnam/NCVD-1148/2011 | National Centre of Veterinary Diagn | Centers for Disease Control and Prevention |
| EPI425825 | PB1 | Vietnam | 2011-Sep-08 | A/chicken/Vietnam/NCVD-1059/2011 | National Centre of Veterinary Diagn | Centers for Disease Control and Prevention |
| EPI425817 | PB1 | Vietnam | 2011-Sep-08 | A/muscovy duck/Vietnam/NCVD-1049 | National Centre of Veterinary Diagn | Centers for Disease Control and Prevention |
| EPI425809 | PB1 | Vietnam | 2011-Sep-07 | A/duck/Vietnam/NCVD-1048/2011    | National Centre of Veterinary Diagn | Centers for Disease Control and Prevention |
| EPI425801 | PB1 | Vietnam | 2011-Sep-07 | A/duck/Vietnam/NCVD-1044/2011    | National Centre of Veterinary Diagn | Centers for Disease Control and Prevention |
| EPI425793 | PB1 | Vietnam | 2011-Sep-07 | A/duck/Vietnam/NCVD-1042/2011    | National Centre of Veterinary Diagn | Centers for Disease Control and Prevention |
| EPI425785 | PB1 | Vietnam | 2011-Sep-07 | A/chicken/Vietnam/NCVD-1040/2011 | National Centre of Veterinary Diagn | Centers for Disease Control and Prevention |
| EPI425777 | PB1 | Vietnam | 2011-Sep-07 | A/chicken/Vietnam/NCVD-1034/2011 | National Centre of Veterinary Diagn | Centers for Disease Control and Prevention |
| EPI425769 | PB1 | Vietnam | 2011-Jan-01 | A/duck/Vietnam/NCVD-671/2011     | National Centre of Veterinary Diagn | Centers for Disease Control and Prevention |
| EPI425686 | PB1 | Vietnam | 2012-Jul-31 | A/duck/Vietnam/NCVD-1602/2012    | National Centre of Veterinary Diagn | Centers for Disease Control and Prevention |
| EPI425678 | PB1 | Vietnam | 2012-Jul-15 | A/duck/Vietnam/NCVD-1593/2012    | National Centre of Veterinary Diagn | Centers for Disease Control and Prevention |
| EPI425670 | PB1 | Vietnam | 2012-Aug-30 | A/duck/Vietnam/NCVD-1905/2012    | National Centre of Veterinary Diagn | Centers for Disease Control and Prevention |
| EPI425662 | PB1 | Vietnam | 2012-Feb-04 | A/chicken/Vietnam/NCVD-1188/2012 | National Centre of Veterinary Diagn | Centers for Disease Control and Prevention |
| EPI425654 | PB1 | Vietnam | 2012-Sep-21 | A/duck/Vietnam/NCVD-1968/2012    | National Centre of Veterinary Diagn | Centers for Disease Control and Prevention |
| EPI425646 | PB1 | Vietnam | 2012-Aug-24 | A/duck/Vietnam/NCVD-1936/2012    | National Centre of Veterinary Diagn | Centers for Disease Control and Prevention |
| EPI425638 | PB1 | Vietnam | 2012-Aug-19 | A/duck/Vietnam/NCVD-1931/2012    | National Centre of Veterinary Diagn | Centers for Disease Control and Prevention |
| EPI425630 | PB1 | Vietnam | 2012-Aug-16 | A/duck/Vietnam/NCVD-1928/2012    | National Centre of Veterinary Diagn | Centers for Disease Control and Prevention |
| EPI425622 | PB1 | Vietnam | 2012-Aug-18 | A/duck/Vietnam/NCVD-1930/2012    | National Centre of Veterinary Diagn | Centers for Disease Control and Prevention |
| EPI425614 | PB1 | Vietnam | 2012-Mar-02 | A/chicken/Vietnam/NCVD-1488/2012 | National Centre of Veterinary Diagn | Centers for Disease Control and Prevention |
| EPI425606 | PB1 | Vietnam | 2012-Sep-21 | A/chicken/Vietnam/NCVD-1963/2012 | National Centre of Veterinary Diagn | Centers for Disease Control and Prevention |
| EPI425598 | PB1 | Vietnam | 2012-Sep-21 | A/duck/Vietnam/NCVD-1463/2012    | National Centre of Veterinary Diagn | Centers for Disease Control and Prevention |
| EPI425590 | PB1 | Vietnam | 2011-Jun-15 | A/chicken/Vietnam/NCVD-883/2011  | National Centre of Veterinary Diagn | Centers for Disease Control and Prevention |
| EPI425582 | PB1 | Vietnam | 2011-Jun-15 | A/chicken/Vietnam/NCVD-882/2011  | National Centre of Veterinary Diagn | Centers for Disease Control and Prevention |
| EPI425574 | PB1 | Vietnam | 2011-Jun-15 | A/chicken/Vietnam/NCVD-879/2011  | National Centre of Veterinary Diagn | Centers for Disease Control and Prevention |
| EPI425566 | PB1 | Vietnam | 2011-Mar-17 | A/chicken/Vietnam/NCVD-857/2011  | National Centre of Veterinary Diagn | Centers for Disease Control and Prevention |
| EPI425558 | PB1 | Vietnam | 2010-Nov-01 | A/duck/Vietnam/NCVD-645/2010     | National Centre of Veterinary Diagn | Centers for Disease Control and Prevention |
| EPI425550 | PB1 | Vietnam | 2011-Mar-12 | A/duck/Vietnam/NCVD-850/2011     | National Centre of Veterinary Diagn | Centers for Disease Control and Prevention |
| EPI425542 | PB1 | Vietnam | 2011-Mar-03 | A/duck/Vietnam/NCVD-825/2011     | National Centre of Veterinary Diagn | Centers for Disease Control and Prevention |
| EPI425534 | PB1 | Vietnam | 2010-Nov-06 | A/duck/Vietnam/NCVD-815/2010     | National Centre of Veterinary Diagn | Centers for Disease Control and Prevention |
| EPI425526 | PB1 | Vietnam | 2011-Mar-19 | A/chicken/Vietnam/NCVD-802/2011  | National Centre of Veterinary Diagn | Centers for Disease Control and Prevention |
| EPI425518 | PB1 | Vietnam | 2011-Jun-15 | A/chicken/Vietnam/NCVD-780/2011  | National Centre of Veterinary Diagn | Centers for Disease Control and Prevention |
| EPI425510 | PB1 | Vietnam | 2011-Feb-25 | A/chicken/Vietnam/NCVD-777/2011  | National Centre of Veterinary Diagn | Centers for Disease Control and Prevention |
| EPI425502 | PB1 | Vietnam | 2011-Mar-18 | A/duck/Vietnam/NCVD-946/2011     | National Centre of Veterinary Diagn | Centers for Disease Control and Prevention |

Supplementary Table 1

|           |     |         |             |                                  |                                     |                                            |
|-----------|-----|---------|-------------|----------------------------------|-------------------------------------|--------------------------------------------|
| EPI425494 | PB1 | Vietnam | 2011-Aug-04 | A/duck/Vietnam/NCVD-931/2011     | National Centre of Veterinary Diagn | Centers for Disease Control and Prevention |
| EPI425486 | PB1 | Vietnam | 2011-Jul-19 | A/duck/Vietnam/NCVD-927/2011     | National Centre of Veterinary Diagn | Centers for Disease Control and Prevention |
| EPI425478 | PB1 | Vietnam | 2011-Feb-25 | A/chicken/Vietnam/NCVD-775/2011  | National Centre of Veterinary Diagn | Centers for Disease Control and Prevention |
| EPI425470 | PB1 | Vietnam | 2012-Feb-16 | A/chicken/Vietnam/NCVD-1247/2012 | National Centre of Veterinary Diagn | Centers for Disease Control and Prevention |
| EPI425462 | PB1 | Vietnam | 2012-Feb-20 | A/duck/Vietnam/NCVD-1280/2012    | National Centre of Veterinary Diagn | Centers for Disease Control and Prevention |
| EPI425454 | PB1 | Vietnam | 2012-Feb-20 | A/duck/Vietnam/NCVD-1276/2012    | National Centre of Veterinary Diagn | Centers for Disease Control and Prevention |
| EPI425446 | PB1 | Vietnam | 2012-Feb-08 | A/duck/Vietnam/NCVD-1219/2012    | National Centre of Veterinary Diagn | Centers for Disease Control and Prevention |
| EPI425438 | PB1 | Vietnam | 2012-Feb-08 | A/duck/Vietnam/NCVD-1210/2012    | National Centre of Veterinary Diagn | Centers for Disease Control and Prevention |
| EPI425430 | PB1 | Vietnam | 2012-Feb-08 | A/duck/Vietnam/NCVD-1207/2012    | National Centre of Veterinary Diagn | Centers for Disease Control and Prevention |
| EPI425422 | PB1 | Vietnam | 2012-Feb-24 | A/duck/Vietnam/NCVD-1312/2012    | National Centre of Veterinary Diagn | Centers for Disease Control and Prevention |
| EPI425414 | PB1 | Vietnam | 2012-Feb-24 | A/duck/Vietnam/NCVD-1306/2012    | National Centre of Veterinary Diagn | Centers for Disease Control and Prevention |
| EPI425406 | PB1 | Vietnam | 2012-Feb-21 | A/duck/Vietnam/NCVD-1269/2012    | National Centre of Veterinary Diagn | Centers for Disease Control and Prevention |
| EPI425398 | PB1 | Vietnam | 2012-Feb-18 | A/muscovy duck/Vietnam/NCVD-1256 | National Centre of Veterinary Diagn | Centers for Disease Control and Prevention |
| EPI425390 | PB1 | Vietnam | 2012-Feb-16 | A/duck/Vietnam/NCVD-1253/2012    | National Centre of Veterinary Diagn | Centers for Disease Control and Prevention |
| EPI425382 | PB1 | Vietnam | 2012-Feb-16 | A/chicken/Vietnam/NCVD-1248/2012 | National Centre of Veterinary Diagn | Centers for Disease Control and Prevention |
| EPI425374 | PB1 | Vietnam | 2012-Feb-17 | A/duck/Vietnam/NCVD-1234/2012    | National Centre of Veterinary Diagn | Centers for Disease Control and Prevention |
| EPI425366 | PB1 | Vietnam | 2012-Feb-17 | A/duck/Vietnam/NCVD-1232/2012    | National Centre of Veterinary Diagn | Centers for Disease Control and Prevention |
| EPI425358 | PB1 | Vietnam | 2012-Jan-06 | A/chicken/Vietnam/NCVD-1225/2012 | National Centre of Veterinary Diagn | Centers for Disease Control and Prevention |
| EPI425350 | PB1 | Vietnam | 2012-Feb-10 | A/chicken/Vietnam/NCVD-1223/2012 | National Centre of Veterinary Diagn | Centers for Disease Control and Prevention |
| EPI425342 | PB1 | Vietnam | 2011-Apr-04 | A/chicken/Vietnam/NCVD-753/2011  | National Centre of Veterinary Diagn | Centers for Disease Control and Prevention |
| EPI425334 | PB1 | Vietnam | 2012-Feb-08 | A/duck/Vietnam/NCVD-1221/2012    | National Centre of Veterinary Diagn | Centers for Disease Control and Prevention |
| EPI425326 | PB1 | Vietnam | 2012-Feb-08 | A/muscovy duck/Vietnam/NCVD-1220 | National Centre of Veterinary Diagn | Centers for Disease Control and Prevention |
| EPI425318 | PB1 | Vietnam | 2012-Feb-08 | A/duck/Vietnam/NCVD-1217/2012    | National Centre of Veterinary Diagn | Centers for Disease Control and Prevention |
| EPI425310 | PB1 | Vietnam | 2012-Aug-30 | A/duck/Vietnam/NCVD-1904/2012    | National Centre of Veterinary Diagn | Centers for Disease Control and Prevention |
| EPI425302 | PB1 | Vietnam | 2012-Aug-28 | A/duck/Vietnam/NCVD-1902/2012    | National Centre of Veterinary Diagn | Centers for Disease Control and Prevention |
| EPI425294 | PB1 | Vietnam | 2011-Jan-01 | A/duck/Vietnam/NCVD-669/2011     | National Centre of Veterinary Diagn | Centers for Disease Control and Prevention |
| EPI425286 | PB1 | Vietnam | 2011-Jan-01 | A/duck/Vietnam/NCVD-674/2011     | National Centre of Veterinary Diagn | Centers for Disease Control and Prevention |
| EPI425278 | PB1 | Vietnam | 2011-Jan-01 | A/duck/Vietnam/NCVD-673/2011     | National Centre of Veterinary Diagn | Centers for Disease Control and Prevention |
| EPI425270 | PB1 | Vietnam | 2012-Aug-27 | A/duck/Vietnam/NCVD-1901/2012    | National Centre of Veterinary Diagn | Centers for Disease Control and Prevention |
| EPI425262 | PB1 | Vietnam | 2012-Jan-06 | A/chicken/Vietnam/NCVD-1224/2012 | National Centre of Veterinary Diagn | Centers for Disease Control and Prevention |
| EPI425254 | PB1 | Vietnam | 2012-Jan-30 | A/dove/Vietnam/NCVD-1178/2012    | National Centre of Veterinary Diagn | Centers for Disease Control and Prevention |
| EPI425246 | PB1 | Vietnam | 2012-Jan-30 | A/chicken/Vietnam/NCVD-1177/2012 | National Centre of Veterinary Diagn | Centers for Disease Control and Prevention |
| EPI425238 | PB1 | Vietnam | 2012-Jan-13 | A/duck/Vietnam/NCVD-1171/2012    | National Centre of Veterinary Diagn | Centers for Disease Control and Prevention |
| EPI425230 | PB1 | Vietnam | 2011-Dec-30 | A/duck/Vietnam/NCVD-1160/2011    | National Centre of Veterinary Diagn | Centers for Disease Control and Prevention |

Supplementary Table 1

|           |     |         |             |                                  |                                     |                                            |
|-----------|-----|---------|-------------|----------------------------------|-------------------------------------|--------------------------------------------|
| EPI425222 | PB1 | Vietnam | 2011-Nov-26 | A/duck/Vietnam/NCVD1-48/2011     | National Centre of Veterinary Diagn | Centers for Disease Control and Prevention |
| EPI425214 | PB1 | Vietnam | 2011-Nov-26 | A/duck/Vietnam/NCVD1-37/2011     | National Centre of Veterinary Diagn | Centers for Disease Control and Prevention |
| EPI425206 | PB1 | Vietnam | 2012-Feb-04 | A/chicken/Vietnam/NCVD-1192/2012 | National Centre of Veterinary Diagn | Centers for Disease Control and Prevention |
| EPI425198 | PB1 | Vietnam | 2011-Nov-22 | A/duck/Vietnam/NCVD129-7/2011    | National Centre of Veterinary Diagn | Centers for Disease Control and Prevention |
| EPI425190 | PB1 | Vietnam | 2012-Feb-04 | A/chicken/Vietnam/NCVD-1189/2012 | National Centre of Veterinary Diagn | Centers for Disease Control and Prevention |
| EPI425182 | PB1 | Vietnam | 2012-Sep-09 | A/duck/Vietnam/NCVD-1944/2012    | National Centre of Veterinary Diagn | Centers for Disease Control and Prevention |
| EPI425174 | PB1 | Vietnam | 2012-Sep-01 | A/chicken/Vietnam/NCVD-1942/2012 | National Centre of Veterinary Diagn | Centers for Disease Control and Prevention |
| EPI425166 | PB1 | Vietnam | 2011-Mar-17 | A/chicken/Vietnam/NCVD-854/2011  | National Centre of Veterinary Diagn | Centers for Disease Control and Prevention |
| EPI425158 | PB1 | Vietnam | 2012-Aug-25 | A/duck/Vietnam/NCVD-1937/2012    | National Centre of Veterinary Diagn | Centers for Disease Control and Prevention |
| EPI425150 | PB1 | Vietnam | 2012-Aug-23 | A/duck/Vietnam/NCVD-1935/2012    | National Centre of Veterinary Diagn | Centers for Disease Control and Prevention |
| EPI425142 | PB1 | Vietnam | 2012-Aug-21 | A/duck/Vietnam/NCVD-1933/2012    | National Centre of Veterinary Diagn | Centers for Disease Control and Prevention |
| EPI425134 | PB1 | Vietnam | 2012-Aug-28 | A/duck/Vietnam/NCVD-1899/2012    | National Centre of Veterinary Diagn | Centers for Disease Control and Prevention |
| EPI425126 | PB1 | Vietnam | 2012-Aug-21 | A/duck/Vietnam/NCVD-1872/2012    | National Centre of Veterinary Diagn | Centers for Disease Control and Prevention |
| EPI425118 | PB1 | Vietnam | 2012-Feb-20 | A/duck/Vietnam/NCVD-1279/2012    | National Centre of Veterinary Diagn | Centers for Disease Control and Prevention |
| EPI425110 | PB1 | Vietnam | 2012-Sep-06 | A/duck/Vietnam/NCVD-1943/2012    | National Centre of Veterinary Diagn | Centers for Disease Control and Prevention |
| EPI425102 | PB1 | Vietnam | 2012-Jun-12 | A/duck/Vietnam/NCVD-1497/2012    | National Centre of Veterinary Diagn | Centers for Disease Control and Prevention |
| EPI425094 | PB1 | Vietnam | 2011-Apr-03 | A/duck/Vietnam/NCVD-827/2011     | National Centre of Veterinary Diagn | Centers for Disease Control and Prevention |
| EPI425086 | PB1 | Vietnam | 2011-Jun-15 | A/chicken/Vietnam/NCVD-779/2011  | National Centre of Veterinary Diagn | Centers for Disease Control and Prevention |
| EPI425078 | PB1 | Vietnam | 2011-Jun-15 | A/chicken/Vietnam/NCVD-778/2011  | National Centre of Veterinary Diagn | Centers for Disease Control and Prevention |
| EPI425070 | PB1 | Vietnam | 2011-Feb-25 | A/chicken/Vietnam/NCVD-776/2011  | National Centre of Veterinary Diagn | Centers for Disease Control and Prevention |
| EPI425062 | PB1 | Vietnam | 2012-Feb-16 | A/duck/Vietnam/NCVD-1252/2011    | National Centre of Veterinary Diagn | Centers for Disease Control and Prevention |
| EPI425054 | PB1 | Vietnam | 2011-Mar-25 | A/duck/Vietnam/NCVD-760/2011     | National Centre of Veterinary Diagn | Centers for Disease Control and Prevention |
| EPI425046 | PB1 | Vietnam | 2011-Mar-25 | A/duck/Vietnam/NCVD-759/2011     | National Centre of Veterinary Diagn | Centers for Disease Control and Prevention |
| EPI425038 | PB1 | Vietnam | 2011-Mar-25 | A/duck/Vietnam/NCVD-758/2011     | National Centre of Veterinary Diagn | Centers for Disease Control and Prevention |
| EPI425030 | PB1 | Vietnam | 2011-Apr-04 | A/duck/Vietnam/NCVD-754/2011     | National Centre of Veterinary Diagn | Centers for Disease Control and Prevention |
| EPI425022 | PB1 | Vietnam | 2012-Aug-25 | A/duck/Vietnam/NCVD-1884/2012    | National Centre of Veterinary Diagn | Centers for Disease Control and Prevention |
| EPI425014 | PB1 | Vietnam | 2012-Aug-23 | A/duck/Vietnam/NCVD-1878/2012    | National Centre of Veterinary Diagn | Centers for Disease Control and Prevention |
| EPI425006 | PB1 | Vietnam | 2012-May-04 | A/chicken/Vietnam/NCVD-1437/2012 | National Centre of Veterinary Diagn | Centers for Disease Control and Prevention |
| EPI424998 | PB1 | Vietnam | 2011-Feb-26 | A/duck/Vietnam/NCVD-714/2011     | National Centre of Veterinary Diagn | Centers for Disease Control and Prevention |
| EPI424990 | PB1 | Vietnam | 2012-Jul-31 | A/duck/Vietnam/NCVD-1607/2012    | National Centre of Veterinary Diagn | Centers for Disease Control and Prevention |
| EPI424982 | PB1 | Vietnam | 2012-Jul-27 | A/duck/Vietnam/NCVD-1584/2012    | National Centre of Veterinary Diagn | Centers for Disease Control and Prevention |
| EPI424974 | PB1 | Vietnam | 2011-Jun-15 | A/chicken/Vietnam/NCVD-710/2011  | National Centre of Veterinary Diagn | Centers for Disease Control and Prevention |
| EPI424966 | PB1 | Vietnam | 2011-Jun-15 | A/chicken/Vietnam/NCVD-709/2011  | National Centre of Veterinary Diagn | Centers for Disease Control and Prevention |
| EPI424958 | PB1 | Vietnam | 1905-Jul-02 | A/duck/Vietnam/NCVD-891/2010     | National Centre of Veterinary Diagn | Centers for Disease Control and Prevention |



Supplementary Table 1

|           |     |         |             |                                  |                                     |                                            |
|-----------|-----|---------|-------------|----------------------------------|-------------------------------------|--------------------------------------------|
| EPI424950 | PB1 | Vietnam | 1905-Jul-02 | A/duck/Vietnam/NCVD-890/2010     | National Centre of Veterinary Diagn | Centers for Disease Control and Prevention |
| EPI424942 | PB1 | Vietnam | 1905-Jul-02 | A/duck/Vietnam/NCVD-885/2010     | National Centre of Veterinary Diagn | Centers for Disease Control and Prevention |
| EPI424934 | PB1 | Vietnam | 2011-Apr-04 | A/chicken/Vietnam/NCVD-752/2011  | National Centre of Veterinary Diagn | Centers for Disease Control and Prevention |
| EPI424926 | PB1 | Vietnam | 2011-Apr-06 | A/duck/Vietnam/NCVD-947/2011     | National Centre of Veterinary Diagn | Centers for Disease Control and Prevention |
| EPI424918 | PB1 | Vietnam | 2011-Mar-18 | A/duck/Vietnam/NCVD-945/2011     | National Centre of Veterinary Diagn | Centers for Disease Control and Prevention |
| EPI424910 | PB1 | Vietnam | 2011-Feb-12 | A/duck/Vietnam/NCVD-943/2011     | National Centre of Veterinary Diagn | Centers for Disease Control and Prevention |
| EPI424902 | PB1 | Vietnam | 2011-Aug-04 | A/duck/Vietnam/NCVD-935/2011     | National Centre of Veterinary Diagn | Centers for Disease Control and Prevention |
| EPI424894 | PB1 | Vietnam | 2011-Jul-15 | A/chicken/Vietnam/NCVD-921/2011  | National Centre of Veterinary Diagn | Centers for Disease Control and Prevention |
| EPI424886 | PB1 | Vietnam | 2011-Jul-15 | A/duck/Vietnam/NCVD-920/2011     | National Centre of Veterinary Diagn | Centers for Disease Control and Prevention |
| EPI424878 | PB1 | Vietnam | 2011-Sep-06 | A/duck/Vietnam/NCVD-1029/2011    | National Centre of Veterinary Diagn | Centers for Disease Control and Prevention |
| EPI438913 | PB1 | Vietnam | 2011-Sep-06 | A/duck/Vietnam/NCVD-1026/2011    | National Centre of Veterinary Diagn | Centers for Disease Control and Prevention |
| EPI424862 | PB1 | Vietnam | 2011-Sep-06 | A/duck/Vietnam/NCVD-1025/2011    | National Centre of Veterinary Diagn | Centers for Disease Control and Prevention |
| EPI424854 | PB1 | Vietnam | 2011-Sep-06 | A/duck/Vietnam/NCVD-1022/2011    | National Centre of Veterinary Diagn | Centers for Disease Control and Prevention |
| EPI424846 | PB1 | Vietnam | 2011-Sep-06 | A/duck/Vietnam/NCVD-1018/2011    | National Centre of Veterinary Diagn | Centers for Disease Control and Prevention |
| EPI424838 | PB1 | Vietnam | 2011-Jun-24 | A/duck/Vietnam/NCVD-952/2011     | National Centre of Veterinary Diagn | Centers for Disease Control and Prevention |
| EPI424830 | PB1 | Vietnam | 2011-Jun-15 | A/duck/Vietnam/NCVD-711/2011     | National Centre of Veterinary Diagn | Centers for Disease Control and Prevention |
| EPI424822 | PB1 | Vietnam | 2011-Mar-28 | A/duck/Vietnam/NCVD-806/2011     | National Centre of Veterinary Diagn | Centers for Disease Control and Prevention |
| EPI424814 | PB1 | Vietnam | 2011-Feb-26 | A/duck/Vietnam/NCVD-712/2011     | National Centre of Veterinary Diagn | Centers for Disease Control and Prevention |
| EPI424806 | PB1 | Vietnam | 2011-Jun-15 | A/chicken/Vietnam/NCVD-881/2011  | National Centre of Veterinary Diagn | Centers for Disease Control and Prevention |
| EPI424798 | PB1 | Vietnam | 2011-Jun-15 | A/chicken/Vietnam/NCVD-880/2011  | National Centre of Veterinary Diagn | Centers for Disease Control and Prevention |
| EPI424790 | PB1 | Vietnam | 2011-Jun-15 | A/chicken/Vietnam/NCVD-876/2011  | National Centre of Veterinary Diagn | Centers for Disease Control and Prevention |
| EPI424782 | PB1 | Vietnam | 2011-Apr-07 | A/duck/Vietnam/NCVD-861/2011     | National Centre of Veterinary Diagn | Centers for Disease Control and Prevention |
| EPI424774 | PB1 | Vietnam | 2011-Apr-07 | A/duck/Vietnam/NCVD-859/2011     | National Centre of Veterinary Diagn | Centers for Disease Control and Prevention |
| EPI424766 | PB1 | Vietnam | 2011-Mar-12 | A/duck/Vietnam/NCVD-851/2011     | National Centre of Veterinary Diagn | Centers for Disease Control and Prevention |
| EPI424758 | PB1 | Vietnam | 2012-Feb-20 | A/chicken/Vietnam/NCVD-1277/2012 | National Centre of Veterinary Diagn | Centers for Disease Control and Prevention |
| EPI424750 | PB1 | Vietnam | 2010-Oct-29 | A/duck/Vietnam/NCVD-784/2010     | National Centre of Veterinary Diagn | Centers for Disease Control and Prevention |
| EPI424742 | PB1 | Vietnam | 2012-Aug-20 | A/duck/Vietnam/NCVD-1932/2012    | National Centre of Veterinary Diagn | Centers for Disease Control and Prevention |
| EPI424734 | PB1 | Vietnam | 2012-Aug-15 | A/chicken/Vietnam/NCVD-1927/2012 | National Centre of Veterinary Diagn | Centers for Disease Control and Prevention |
| EPI424726 | PB1 | Vietnam | 2012-Aug-27 | A/duck/Vietnam/NCVD-1898/2012    | National Centre of Veterinary Diagn | Centers for Disease Control and Prevention |
| EPI424718 | PB1 | Vietnam | 2012-Aug-23 | A/duck/Vietnam/NCVD-1897/2012    | National Centre of Veterinary Diagn | Centers for Disease Control and Prevention |
| EPI424710 | PB1 | Vietnam | 2012-Aug-23 | A/duck/Vietnam/NCVD-1896/2012    | National Centre of Veterinary Diagn | Centers for Disease Control and Prevention |
| EPI424702 | PB1 | Vietnam | 2012-Aug-20 | A/duck/Vietnam/NCVD-1869/2012    | National Centre of Veterinary Diagn | Centers for Disease Control and Prevention |
| EPI424694 | PB1 | Vietnam | 2011-Apr-06 | A/duck/Vietnam/NCVD-948/2011     | National Centre of Veterinary Diagn | Centers for Disease Control and Prevention |
| EPI424686 | PB1 | Vietnam | 2012-Sep-21 | A/duck/Vietnam/NCVD-1974/2012    | National Centre of Veterinary Diagn | Centers for Disease Control and Prevention |

Supplementary Table 1

|           |     |         |             |                                   |                                     |                                                     |
|-----------|-----|---------|-------------|-----------------------------------|-------------------------------------|-----------------------------------------------------|
| EPI424678 | PB1 | Vietnam | 2012-Jun-11 | A/duck/Vietnam/NCVD-1494/2012     | National Centre of Veterinary Diagr | Centers for Disease Control and Prevention          |
| EPI424670 | PB1 | Vietnam | 2012-Aug-29 | A/duck/Vietnam/NCVD-1940/2012     | National Centre of Veterinary Diagr | Centers for Disease Control and Prevention          |
| EPI424662 | PB1 | Vietnam | 2012-Feb-18 | A/chicken/Vietnam/NCVD-1255/2012  | National Centre of Veterinary Diagr | Centers for Disease Control and Prevention          |
| EPI424432 | PB1 | Vietnam | 2011-Feb-01 | A/chicken/Vietnam/NCVD-705/2011   | National Centre of Veterinary Diagr | Centers for Disease Control and Prevention          |
| EPI424424 | PB1 | Vietnam | 2011-Feb-01 | A/chicken/Vietnam/NCVD-704/2011   | National Centre of Veterinary Diagr | Centers for Disease Control and Prevention          |
| EPI424416 | PB1 | Vietnam | 2011-Feb-01 | A/chicken/Vietnam/NCVD-703/2011   | National Centre of Veterinary Diagr | Centers for Disease Control and Prevention          |
| EPI424408 | PB1 | Vietnam | 2011-Feb-01 | A/chicken/Vietnam/NCVD-702/2011   | National Centre of Veterinary Diagr | Centers for Disease Control and Prevention          |
| EPI424400 | PB1 | Vietnam | 2011-Feb-01 | A/chicken/Vietnam/NCVD-699/2011   | National Centre of Veterinary Diagr | Centers for Disease Control and Prevention          |
| EPI424392 | PB1 | Vietnam | 2012-Feb-26 | A/duck/Vietnam/NCVD-1283/2012     | National Centre of Veterinary Diagr | Centers for Disease Control and Prevention          |
| EPI424384 | PB1 | Vietnam | 2011-Feb-01 | A/chicken/Vietnam/NCVD-685/2011   | National Centre of Veterinary Diagr | Centers for Disease Control and Prevention          |
| EPI424376 | PB1 | Vietnam | 2011-Feb-01 | A/duck/Vietnam/NCVD-680/2011      | National Centre of Veterinary Diagr | Centers for Disease Control and Prevention          |
| EPI424368 | PB1 | Vietnam | 2010-Dec-01 | A/duck/Vietnam/NCVD-664/2010      | National Centre of Veterinary Diagr | Centers for Disease Control and Prevention          |
| EPI424360 | PB1 | Vietnam | 2012-Feb-08 | A/duck/Vietnam/NCVD-1206/2012     | National Centre of Veterinary Diagr | Centers for Disease Control and Prevention          |
| EPI424352 | PB1 | Vietnam | 2011-Jun-15 | A/chicken/Vietnam/NCVD-878/2011   | National Centre of Veterinary Diagr | Centers for Disease Control and Prevention          |
| EPI484293 | PB1 | Italy   | 2013-Aug-13 | A/chicken/Italy/13VIR4527-11/2013 | Istituto Zooprofilattico Sperimenta | Istituto Zooprofilattico Sperimentale Delle Venezie |
| EPI466532 | PB1 | China   | 2012-Dec-23 | A/chicken/Jiangsu/YCDF/2012       | Yangzhou University                 | Chinese Academy of Sciences                         |
| EPI466528 | PB1 | China   | 2012-Dec-28 | A/chicken/Jiangsu/NTHA1/2012      | Yangzhou University                 | Chinese Academy of Sciences                         |
| EPI466521 | PB1 | China   | 2012-Nov-09 | A/chicken/Jiangsu/YZ4/2012        | Yangzhou University                 | Chinese Academy of Sciences                         |
| EPI466515 | PB1 | China   | 2013-Apr-05 | A/chicken/Jiangsu/TZXH/2013       | Yangzhou University                 | Chinese Academy of Sciences                         |
| EPI466509 | PB1 | China   | 2013-Mar-29 | A/chicken/Jiangsu/YCDT/2013       | Yangzhou University                 | Chinese Academy of Sciences                         |
| EPI466502 | PB1 | China   | 2013-Jan-23 | A/chicken/Jiangsu/CZWJ5/2013      | Yangzhou University                 | Chinese Academy of Sciences                         |
| EPI466494 | PB1 | China   | 2012-Nov-20 | A/chicken/Jiangsu/CZ1/2012        | Yangzhou University                 | Chinese Academy of Sciences                         |
| EPI466480 | PB1 | China   | 2013-Apr-05 | A/chicken/Jiangsu/HA2/2013        | Yangzhou University                 | Chinese Academy of Sciences                         |
| EPI466472 | PB1 | China   | 2013-Jan-07 | A/chicken/Jiangsu/NTTZ/2013       | Yangzhou University                 | Chinese Academy of Sciences                         |
| EPI466456 | PB1 | China   | 2013-Jan-23 | A/chicken/Jiangsu/ZJ4/2013        | Yangzhou University                 | Chinese Academy of Sciences                         |
| EPI466448 | PB1 | China   | 2013-Jan-23 | A/chicken/Jiangsu/CZJT2/2013      | Yangzhou University                 | Chinese Academy of Sciences                         |
| EPI466440 | PB1 | China   | 2012-Nov-06 | A/chicken/Jiangsu/XZ6/2012        | Yangzhou University                 | Chinese Academy of Sciences                         |
| EPI466432 | PB1 | China   | 2013-Mar-28 | A/chicken/Jiangsu/ZJDT1/2013      | Yangzhou University                 | Chinese Academy of Sciences                         |
| EPI466424 | PB1 | China   | 2012-Mar-24 | A/chicken/Jiangsu/WJYBF/2012      | Yangzhou University                 | Chinese Academy of Sciences                         |
| EPI466416 | PB1 | China   | 2012-May-12 | A/chicken/Jiangsu/CZJF/2012       | Yangzhou University                 | Chinese Academy of Sciences                         |
| EPI466408 | PB1 | China   | 2012-Mar-24 | A/chicken/Jiangsu/MYJMF/2012      | Yangzhou University                 | Chinese Academy of Sciences                         |
| EPI466400 | PB1 | China   | 2012-Apr-16 | A/chicken/Jiangsu/XZLZG/2012      | Yangzhou University                 | Chinese Academy of Sciences                         |
| EPI466392 | PB1 | China   | 2011-May-11 | A/chicken/Jiangsu/YZ0511/2011     | Yangzhou University                 | Chinese Academy of Sciences                         |
| EPI466384 | PB1 | China   | 2012-Mar-24 | A/chicken/Jiangsu/CZYWP/2012      | Yangzhou University                 | Chinese Academy of Sciences                         |

Supplementary Table 1

|           |     |       |             |                                    |                                       |                                                     |
|-----------|-----|-------|-------------|------------------------------------|---------------------------------------|-----------------------------------------------------|
| EPI466376 | PB1 | China | 2011-Jan-21 | A/chicken/Jiangsu/DTNSZ/2011       | Yangzhou University                   | Chinese Academy of Sciences                         |
| EPI466368 | PB1 | China | 2011-Jun-11 | A/chicken/Jiangsu/YZ0611/2011      | Yangzhou University                   | Chinese Academy of Sciences                         |
| EPI466360 | PB1 | China | 2012-Feb-12 | A/chicken/Jiangsu/DT0112/2012      | Yangzhou University                   | Chinese Academy of Sciences                         |
| EPI466352 | PB1 | China | 2012-May-09 | A/chicken/Shangdong/SDWF29/2012    | Yangzhou University                   | Chinese Academy of Sciences                         |
| EPI466344 | PB1 | China | 2012-Mar-24 | A/chicken/Jiangsu/XZWHL/2012       | Yangzhou University                   | Chinese Academy of Sciences                         |
| EPI466336 | PB1 | China | 2012-Mar-24 | A/chicken/Jiangsu/XZZSL/2012       | Yangzhou University                   | Chinese Academy of Sciences                         |
| EPI466328 | PB1 | China | 2012-Mar-24 | A/chicken/Jiangsu/CZLJG/2012       | Yangzhou University                   | Chinese Academy of Sciences                         |
| EPI466320 | PB1 | China | 2009-Sep-20 | A/chicken/Jiangsu/DT/2009          | Yangzhou University                   | Chinese Academy of Sciences                         |
| EPI466312 | PB1 | China | 2011-May-21 | A/chicken/Jiangsu/ZJDT/2011        | Yangzhou University                   | Chinese Academy of Sciences                         |
| EPI466304 | PB1 | China | 2011-Mar-28 | A/chicken/Jiangsu/XZPZ/2011        | Yangzhou University                   | Chinese Academy of Sciences                         |
| EPI466296 | PB1 | China | 2012-Apr-13 | A/chicken/Jiangsu/XZMG/2012        | Yangzhou University                   | Chinese Academy of Sciences                         |
| EPI466288 | PB1 | China | 2011-Jan-26 | A/chicken/Shangdong/SDWD/2011      | Yangzhou University                   | Chinese Academy of Sciences                         |
| EPI466280 | PB1 | China | 2012-May-09 | A/chicken/Shangdong/SDWF14/2012    | Yangzhou University                   | Chinese Academy of Sciences                         |
| EPI466272 | PB1 | China | 2012-Mar-24 | A/chicken/Jiangsu/WJHRG/2012       | Yangzhou University                   | Chinese Academy of Sciences                         |
| EPI466264 | PB1 | China | 2012-May-09 | A/chicken/Shandong/SDWF17/2012     | Yangzhou University                   | Chinese Academy of Sciences                         |
| EPI466256 | PB1 | China | 2012-Jan-12 | A/chicken/Jiangsu/XZ38/2012        | Yangzhou University                   | Chinese Academy of Sciences                         |
| EPI466248 | PB1 | China | 2012-May-12 | A/chicken/Jiangsu/CZZWQ/2012       | Yangzhou University                   | Chinese Academy of Sciences                         |
| EPI464944 | PB1 | Italy | 2012-Sep-28 | A/chicken/Italy/12VIR-7785-67/2012 | Istituto Zooprofilattico Sperimentale | Istituto Zooprofilattico Sperimentale Delle Venezie |
| EPI464928 | PB1 | Italy | 2011-Dec-28 | A/chicken/Italy/11VIR-7548/2011    | Istituto Zooprofilattico Sperimentale | Istituto Zooprofilattico Sperimentale Delle Venezie |
| EPI457883 | PB1 | China | 2013-May-03 | A/chicken/Guangdong/SD641/2013     | Harbin Veterinary Research Institute  | Harbin Veterinary Research Institute                |
| EPI457875 | PB1 | China | 2013-Apr-16 | A/chicken/Jiangsu/S002/2013        | Harbin Veterinary Research Institute  | Harbin Veterinary Research Institute                |
| EPI457867 | PB1 | China | 2013-Apr-16 | A/chicken/Jiangsu/SC035/2013       | Harbin Veterinary Research Institute  | Harbin Veterinary Research Institute                |
| EPI457859 | PB1 | China | 2013-Apr-16 | A/chicken/Jiangsu/SC099/2013       | Harbin Veterinary Research Institute  | Harbin Veterinary Research Institute                |
| EPI457851 | PB1 | China | 2013-Apr-16 | A/chicken/Jiangsu/SC537/2013       | Harbin Veterinary Research Institute  | Harbin Veterinary Research Institute                |
| EPI457843 | PB1 | China | 2013-May-03 | A/chicken/Jiangxi/SD001/2013       | Harbin Veterinary Research Institute  | Harbin Veterinary Research Institute                |
| EPI457835 | PB1 | China | 2013-Apr-03 | A/chicken/Shanghai/S1055/2013      | Harbin Veterinary Research Institute  | Harbin Veterinary Research Institute                |
| EPI457827 | PB1 | China | 2013-Apr-03 | A/chicken/Shanghai/S1076/2013      | Harbin Veterinary Research Institute  | Harbin Veterinary Research Institute                |
| EPI457819 | PB1 | China | 2013-Apr-03 | A/chicken/Shanghai/S1077/2013      | Harbin Veterinary Research Institute  | Harbin Veterinary Research Institute                |
| EPI457811 | PB1 | China | 2013-Apr-03 | A/chicken/Shanghai/S1078/2013      | Harbin Veterinary Research Institute  | Harbin Veterinary Research Institute                |
| EPI457803 | PB1 | China | 2013-Apr-03 | A/chicken/Shanghai/S1079/2013      | Harbin Veterinary Research Institute  | Harbin Veterinary Research Institute                |
| EPI457795 | PB1 | China | 2013-Apr-03 | A/chicken/Shanghai/S1080/2013      | Harbin Veterinary Research Institute  | Harbin Veterinary Research Institute                |
| EPI457787 | PB1 | China | 2013-Apr-03 | A/chicken/Shanghai/S1358/2013      | Harbin Veterinary Research Institute  | Harbin Veterinary Research Institute                |
| EPI457779 | PB1 | China | 2013-Apr-03 | A/chicken/Shanghai/S1410/2013      | Harbin Veterinary Research Institute  | Harbin Veterinary Research Institute                |
| EPI457771 | PB1 | China | 2013-Apr-03 | A/chicken/Shanghai/S1413/2013      | Harbin Veterinary Research Institute  | Harbin Veterinary Research Institute                |

Supplementary Table 1

|           |     |         |             |                                    |                                                                 |                                                     |
|-----------|-----|---------|-------------|------------------------------------|-----------------------------------------------------------------|-----------------------------------------------------|
| EPI457763 | PB1 | China   | 2013-Apr-22 | A/chicken/Zhejiang/SD007/2013      | Harbin Veterinary Research Institute                            | Harbin Veterinary Research Institute                |
| EPI457755 | PB1 | China   | 2013-Apr-11 | A/chicken/Zhejiang/SD019/2013      | Harbin Veterinary Research Institute                            | Harbin Veterinary Research Institute                |
| EPI457747 | PB1 | China   | 2013-Apr-11 | A/chicken/Zhejiang/SD033/2013      | Harbin Veterinary Research Institute                            | Harbin Veterinary Research Institute                |
| EPI468356 | PB1 | China   | 2013-Apr-10 | A/chicken/Hangzhou/50-2/2013(H9N)  | Hangzhou Center for Disease Control and Prevention              | Hangzhou Center for Disease Control and Prevention  |
| EPI468350 | PB1 | China   | 2013-Apr-10 | A/chicken/Hangzhou/48-2/2013(H9N)  | Hangzhou Center for Disease Control and Prevention              | Hangzhou Center for Disease Control and Prevention  |
| EPI447889 | PB1 | China   | 2013-Mar-29 | A/chicken/Anhui-Chuzhou/01/2013    |                                                                 | WHO Chinese National Influenza Center               |
| EPI443665 | PB1 | China   | 2013-Apr-10 | A/chicken/Hangzhou/50-1/2013(H7N)  | Hangzhou Center for Disease Control and Prevention              | Hangzhou Center for Disease Control and Prevention  |
| EPI443657 | PB1 | China   | 2013-Apr-10 | A/chicken/Hangzhou/48-1/2013(H7N)  | Hangzhou Center for Disease Control and Prevention              | Hangzhou Center for Disease Control and Prevention  |
| EPI440683 | PB1 | China   | 2013-Apr-03 | A/Chicken/Shanghai/S1053/2013      | Harbin Veterinary Research Institute                            | Harbin Veterinary Research Institute                |
| EPI466240 | PB1 | China   | 2012-Mar-24 | A/chicken/Jiangsu/WJHDL/2012       | Yangzhou University                                             | Chinese Academy of Sciences                         |
| EPI459872 | PB1 | Taiwan  | 2013-May-15 | A/chicken/Taiwan/A2837/2013(H6N)   | ANIMAL HEALTH RESEARCH INSTITUTE                                | ANIMAL HEALTH RESEARCH INSTITUTE                    |
| EPI466464 | PB1 | China   | 2013-Apr-05 | A/duck/Jiangsu/YC2/2013            | Yangzhou University                                             | Chinese Academy of Sciences                         |
| EPI457739 | PB1 | China   | 2013-Apr-16 | A/duck/Anhui/SC702/2013            | Harbin Veterinary Research Institute                            | Harbin Veterinary Research Institute                |
| EPI457731 | PB1 | China   | 2013-Apr-16 | A/duck/Zhejiang/SC410/2013         | Harbin Veterinary Research Institute                            | Harbin Veterinary Research Institute                |
| EPI431454 | PB1 | China   | 2011-Dec-07 | A/duck/Hebei/3/2011                | Institute of Microbiology, Chinese Academy of Sciences          | Institute of Microbiology                           |
| EPI431446 | PB1 | China   | 2011-Dec-01 | A/duck/Hebei/2/2011                | Institute of Microbiology, Chinese Academy of Sciences          | Institute of Microbiology                           |
| EPI466212 | PB1 | China   | 2013-Mar-28 | A/Mallard/Zhejiang/136/2013        | State Key Laboratory of Virology and Host-Pathogen Interactions | Chinese Academy of Sciences                         |
| EPI490870 | PB1 | Germany | 2013-Apr-11 | A/turkey/Germany-NI/R534/2013      |                                                                 | Friedrich-Loeffler-Institut                         |
| EPI464952 | PB1 | Italy   | 2012-Jun-28 | A/turkey/Italy/12VIR-8036-2/2012   | Istituto Zooprofilattico Sperimentale                           | Istituto Zooprofilattico Sperimentale Delle Venezie |
| EPI457643 | PB1 | China   | 2013-Apr-20 | A/homing pigeon/Jiangsu/SD184/2013 | Harbin Veterinary Research Institute                            | Harbin Veterinary Research Institute                |
| EPI457635 | PB1 | China   | 2013-Apr-03 | A/pigeon/Shanghai/S1421/2013       | Harbin Veterinary Research Institute                            | Harbin Veterinary Research Institute                |
| EPI457619 | PB1 | China   | 2013-Apr-17 | A/wild pigeon/Jiangsu/SD001/2013   | Harbin Veterinary Research Institute                            | Harbin Veterinary Research Institute                |
| EPI440699 | PB1 | China   | 2013-Apr-02 | A/Pigeon/Shanghai/S1069/2013       | Harbin Veterinary Research Institute                            | Harbin Veterinary Research Institute                |
| EPI412102 | PB1 | Germany | 2012-Jan-01 | A/swine/Germany/R495/2012          |                                                                 | Friedrich-Loeffler-Institut                         |
| EPI411974 | PB1 | Germany | 2011-Jan-01 | A/swine/Germany/R83/2011           |                                                                 | Friedrich-Loeffler-Institut                         |
| EPI411949 | PB1 | Germany | 2010-Jan-01 | A/swine/Germany/R1421/2010         |                                                                 | Friedrich-Loeffler-Institut                         |
| EPI411906 | PB1 | Germany | 2010-Jan-01 | A/swine/Germany/R494/2010          |                                                                 | Friedrich-Loeffler-Institut                         |
| EPI411859 | PB1 | Germany | 2009-Jan-01 | A/swine/Germany/R325/2009          |                                                                 | Friedrich-Loeffler-Institut                         |
| EPI396880 | PB1 | Germany | 2009-Jan-01 | A/wild boar/Germany-HE/ws336/2009  |                                                                 | Friedrich-Loeffler-Institut                         |
| EPI356464 | PB1 | Germany | 2011-Jan-01 | A/swine/Germany/R75/2011           |                                                                 | Friedrich-Loeffler-Institut                         |
| EPI356447 | PB1 | Germany | 2011-Jan-01 | A/swine/Germany/R1048/2011         |                                                                 | Friedrich-Loeffler-Institut                         |
| EPI347278 | PB1 | Norway  | 2009-Oct-09 | A/swine/Norway/02-11342/2009       | Norwegian Veterinary Institute                                  | Norwegian Institute of Public Health                |
| EPI497538 | PB1 | China   | 2012-Oct-09 | A/environment/Jiangxi/02899/2012   |                                                                 | WHO Chinese National Influenza Center               |
| EPI497535 | PB1 | China   | 2012-Oct-09 | A/environment/Jiangxi/02895/2012   |                                                                 | WHO Chinese National Influenza Center               |

Supplementary Table 1

|           |     |              |             |                                      |                                      |                                                    |
|-----------|-----|--------------|-------------|--------------------------------------|--------------------------------------|----------------------------------------------------|
| EPI497522 | PB1 | China        | 2013-Feb-27 | A/environment/Jiangxi/00452/2013     |                                      | WHO Chinese National Influenza Center              |
| EPI497498 | PB1 | China        | 2013-Mar-13 | A/environment/Chongqing/00516/2013   |                                      | WHO Chinese National Influenza Center              |
| EPI457723 | PB1 | China        | 2013-Apr-30 | A/environment/Fujian/SC337/2013      | Harbin Veterinary Research Institut  | Harbin Veterinary Research Institute               |
| EPI457715 | PB1 | China        | 2013-Apr-24 | A/environment/Henan/SC232/2013       | Harbin Veterinary Research Institut  | Harbin Veterinary Research Institute               |
| EPI457707 | PB1 | China        | 2013-Apr-24 | A/environment/Henan/SD429/2013       | Harbin Veterinary Research Institut  | Harbin Veterinary Research Institute               |
| EPI457699 | PB1 | China        | 2013-May-03 | A/environment/Shandong/SD038/2013    | Harbin Veterinary Research Institut  | Harbin Veterinary Research Institute               |
| EPI457691 | PB1 | China        | 2013-May-03 | A/environment/Shandong/SD039/2013    | Harbin Veterinary Research Institut  | Harbin Veterinary Research Institute               |
| EPI457683 | PB1 | China        | 2013-May-03 | A/environment/Shandong/SD049/2013    | Harbin Veterinary Research Institut  | Harbin Veterinary Research Institute               |
| EPI457675 | PB1 | China        | 2013-Apr-03 | A/environment/Shanghai/S1436/2013    | Harbin Veterinary Research Institut  | Harbin Veterinary Research Institute               |
| EPI457667 | PB1 | China        | 2013-Apr-03 | A/environment/Shanghai/S1437/2013    | Harbin Veterinary Research Institut  | Harbin Veterinary Research Institute               |
| EPI457659 | PB1 | China        | 2013-Apr-03 | A/environment/Shanghai/S1438/2013    | Harbin Veterinary Research Institut  | Harbin Veterinary Research Institute               |
| EPI448285 | PB1 | Bangladesh   | 2010-May-25 | A/environment/Bangladesh/100/2010    | Institute of Epidemiology Disease C  | Centers for Disease Control and Prevention         |
| EPI448261 | PB1 | Bangladesh   | 2012-Feb-28 | A/environment/Bangladesh/1019-G/2012 | Institute of Epidemiology Disease C  | Centers for Disease Control and Prevention         |
| EPI448253 | PB1 | Bangladesh   | 2011-Dec-30 | A/environment/Bangladesh/1017-1/2011 | Institute of Epidemiology Disease C  | Centers for Disease Control and Prevention         |
| EPI448245 | PB1 | Bangladesh   | 2011-Dec-28 | A/environment/Bangladesh/1011/2011   | Institute of Epidemiology Disease C  | Centers for Disease Control and Prevention         |
| EPI448237 | PB1 | Bangladesh   | 2011-Sep-29 | A/environment/Bangladesh/1018/2011   | Institute of Epidemiology Disease C  | Centers for Disease Control and Prevention         |
| EPI448117 | PB1 | Bangladesh   | 2011-May-29 | A/environment/Bangladesh/1017/2011   | Institute of Epidemiology Disease C  | Centers for Disease Control and Prevention         |
| EPI447650 | PB1 | China        | 2013-Apr-27 | A/Environment/Shandong/1/2013        |                                      | WHO Chinese National Influenza Center              |
| EPI440691 | PB1 | China        | 2013-Apr-03 | A/Environment/Shanghai/S1088/2013    | Harbin Veterinary Research Institut  | Harbin Veterinary Research Institute               |
| EPI443649 | PB1 | China        | 2013-Apr-04 | A/environment/Hangzhou/37/2013       | Hangzhou Center for Disease Contr    | Hangzhou Center for Disease Control and Prevention |
| EPI468344 | PB1 | China        | 2013-Apr-12 | A/environment/Hangzhou/109-2/2013    | Hangzhou Center for Disease Contr    | Hangzhou Center for Disease Control and Prevention |
| EPI443570 | PB1 | China        | 2013-Apr-04 | A/environment/Hangzhou/34-1/2013     | Hangzhou Center for Disease Contr    | Hangzhou Center for Disease Control and Prevention |
| EPI491033 | PB1 | China        | 2013-May-14 | A/environment/Guangdong/C130582      | Guangdong Provincial Center for Di   | Guandong Centers for Disease Control               |
| EPI491025 | PB1 | China        | 2013-May-18 | A/environment/Guangdong/2013XN1      | Guangdong Provincial Center for Di   | Guandong Centers for Disease Control               |
| EPI491017 | PB1 | China        | 2013-May-14 | A/environment/Guangdong/C130582      | Guangdong Provincial Center for Di   | Guandong Centers for Disease Control               |
| EPI491009 | PB1 | China        | 2013-May-28 | A/environment/Guangdong/GD13021      | Guangdong Provincial Center for Di   | Guandong Centers for Disease Control               |
| EPI491001 | PB1 | China        | 2013-May-28 | A/environment/Guangdong/GD13020      | Guangdong Provincial Center for Di   | Guandong Centers for Disease Control               |
| EPI490993 | PB1 | China        | 2013-May-07 | A/environment/Guangdong/GD13018      | Guangdong Provincial Center for Di   | Guandong Centers for Disease Control               |
| EPI490969 | PB1 | China        | 2013-Apr-26 | A/Environment/Guangdong/C132810      | Guangdong Provincial Center for Di   | Guandong Centers for Disease Control               |
| EPI465411 | PB1 | China        | 2013-Apr-07 | A/Enviroment/Zhenjiang/h9/2013       | Jiangsu Provincial Center for Diseas | institution of microbiology                        |
| EPI489318 | PB1 | United State | 2012-Jan-01 | A/New York/39/2012 X-233             | New York Medical College             | Centers for Disease Control and Prevention         |
| EPI432531 | PB1 | China        | 2010-Apr-27 | r8                                   | Harbin Veterinary Research Institut  | Harbin Veterinary Research Institute               |
| EPI432523 | PB1 | China        | 2010-Apr-27 | r78                                  | Harbin Veterinary Research Institut  | Harbin Veterinary Research Institute               |
| EPI432507 | PB1 | China        | 2010-Apr-27 | r68                                  | Harbin Veterinary Research Institut  | Harbin Veterinary Research Institute               |

Supplementary Table 1

|           |     |       |             |        |                                     |                                      |
|-----------|-----|-------|-------------|--------|-------------------------------------|--------------------------------------|
| EPI432499 | PB1 | China | 2010-Apr-27 | r678   | Harbin Veterinary Research Institut | Harbin Veterinary Research Institute |
| EPI432491 | PB1 | China | 2010-Apr-27 | r67    | Harbin Veterinary Research Institut | Harbin Veterinary Research Institute |
| EPI432483 | PB1 | China | 2010-Apr-21 | r6     | Harbin Veterinary Research Institut | Harbin Veterinary Research Institute |
| EPI432467 | PB1 | China | 2010-Apr-21 | r578   | Harbin Veterinary Research Institut | Harbin Veterinary Research Institute |
| EPI432459 | PB1 | China | 2010-Apr-21 | r57    | Harbin Veterinary Research Institut | Harbin Veterinary Research Institute |
| EPI432451 | PB1 | China | 2010-Apr-21 | r568   | Harbin Veterinary Research Institut | Harbin Veterinary Research Institute |
| EPI432443 | PB1 | China | 2010-Apr-21 | r5678  | Harbin Veterinary Research Institut | Harbin Veterinary Research Institute |
| EPI432435 | PB1 | China | 2010-Apr-21 | r567   | Harbin Veterinary Research Institut | Harbin Veterinary Research Institute |
| EPI432427 | PB1 | China | 2010-Apr-16 | r56    | Harbin Veterinary Research Institut | Harbin Veterinary Research Institute |
| EPI432419 | PB1 | China | 2010-Apr-16 | r5     | Harbin Veterinary Research Institut | Harbin Veterinary Research Institute |
| EPI432403 | PB1 | China | 2010-Apr-16 | r378   | Harbin Veterinary Research Institut | Harbin Veterinary Research Institute |
| EPI432395 | PB1 | China | 2010-Apr-16 | r37    | Harbin Veterinary Research Institut | Harbin Veterinary Research Institute |
| EPI432387 | PB1 | China | 2010-Apr-16 | r368   | Harbin Veterinary Research Institut | Harbin Veterinary Research Institute |
| EPI432379 | PB1 | China | 2010-Apr-10 | r3678  | Harbin Veterinary Research Institut | Harbin Veterinary Research Institute |
| EPI432371 | PB1 | China | 2010-Apr-10 | r367   | Harbin Veterinary Research Institut | Harbin Veterinary Research Institute |
| EPI432355 | PB1 | China | 2010-Apr-10 | r358   | Harbin Veterinary Research Institut | Harbin Veterinary Research Institute |
| EPI432347 | PB1 | China | 2010-Apr-10 | r3578  | Harbin Veterinary Research Institut | Harbin Veterinary Research Institute |
| EPI432339 | PB1 | China | 2010-Apr-03 | r357   | Harbin Veterinary Research Institut | Harbin Veterinary Research Institute |
| EPI432331 | PB1 | China | 2010-Apr-03 | r3568  | Harbin Veterinary Research Institut | Harbin Veterinary Research Institute |
| EPI432315 | PB1 | China | 2010-Apr-03 | r3567  | Harbin Veterinary Research Institut | Harbin Veterinary Research Institute |
| EPI432307 | PB1 | China | 2010-Apr-03 | r356   | Harbin Veterinary Research Institut | Harbin Veterinary Research Institute |
| EPI432299 | PB1 | China | 2010-Apr-03 | r35    | Harbin Veterinary Research Institut | Harbin Veterinary Research Institute |
| EPI432291 | PB1 | China | 2010-Apr-03 | r3     | Harbin Veterinary Research Institut | Harbin Veterinary Research Institute |
| EPI432283 | PB1 | China | 2010-Mar-28 | r28    | Harbin Veterinary Research Institut | Harbin Veterinary Research Institute |
| EPI432267 | PB1 | China | 2010-Mar-28 | r27    | Harbin Veterinary Research Institut | Harbin Veterinary Research Institute |
| EPI432259 | PB1 | China | 2010-Mar-28 | r268   | Harbin Veterinary Research Institut | Harbin Veterinary Research Institute |
| EPI432251 | PB1 | China | 2010-Mar-28 | r2678  | Harbin Veterinary Research Institut | Harbin Veterinary Research Institute |
| EPI432243 | PB1 | China | 2010-Mar-28 | r267   | Harbin Veterinary Research Institut | Harbin Veterinary Research Institute |
| EPI432235 | PB1 | China | 2010-Mar-22 | r26    | Harbin Veterinary Research Institut | Harbin Veterinary Research Institute |
| EPI432227 | PB1 | China | 2010-Mar-22 | r258   | Harbin Veterinary Research Institut | Harbin Veterinary Research Institute |
| EPI432219 | PB1 | China | 2010-Mar-22 | r2578  | Harbin Veterinary Research Institut | Harbin Veterinary Research Institute |
| EPI432203 | PB1 | China | 2010-Mar-22 | r2568  | Harbin Veterinary Research Institut | Harbin Veterinary Research Institute |
| EPI432195 | PB1 | China | 2010-Mar-22 | r25678 | Harbin Veterinary Research Institut | Harbin Veterinary Research Institute |
| EPI432187 | PB1 | China | 2010-Mar-17 | r2567  | Harbin Veterinary Research Institut | Harbin Veterinary Research Institute |

Supplementary Table 1

|           |     |       |             |         |                                     |                                      |
|-----------|-----|-------|-------------|---------|-------------------------------------|--------------------------------------|
| EPI432179 | PB1 | China | 2010-Mar-17 | r256    | Harbin Veterinary Research Institut | Harbin Veterinary Research Institute |
| EPI432171 | PB1 | China | 2010-Mar-17 | r25     | Harbin Veterinary Research Institut | Harbin Veterinary Research Institute |
| EPI432163 | PB1 | China | 2010-Mar-17 | r238    | Harbin Veterinary Research Institut | Harbin Veterinary Research Institute |
| EPI432147 | PB1 | China | 2010-Mar-17 | r237    | Harbin Veterinary Research Institut | Harbin Veterinary Research Institute |
| EPI432139 | PB1 | China | 2010-Mar-12 | r2368   | Harbin Veterinary Research Institut | Harbin Veterinary Research Institute |
| EPI432131 | PB1 | China | 2010-Mar-12 | r23678  | Harbin Veterinary Research Institut | Harbin Veterinary Research Institute |
| EPI432123 | PB1 | China | 2010-Mar-12 | r2367   | Harbin Veterinary Research Institut | Harbin Veterinary Research Institute |
| EPI432115 | PB1 | China | 2010-Mar-12 | r236    | Harbin Veterinary Research Institut | Harbin Veterinary Research Institute |
| EPI432107 | PB1 | China | 2010-Mar-12 | r2358   | Harbin Veterinary Research Institut | Harbin Veterinary Research Institute |
| EPI432099 | PB1 | China | 2010-Mar-12 | r23578  | Harbin Veterinary Research Institut | Harbin Veterinary Research Institute |
| EPI432091 | PB1 | China | 2010-Mar-07 | r2357   | Harbin Veterinary Research Institut | Harbin Veterinary Research Institute |
| EPI432083 | PB1 | China | 2010-Mar-07 | r23568  | Harbin Veterinary Research Institut | Harbin Veterinary Research Institute |
| EPI432075 | PB1 | China | 2010-Mar-07 | r235678 | Harbin Veterinary Research Institut | Harbin Veterinary Research Institute |
| EPI432067 | PB1 | China | 2010-Mar-07 | r23567  | Harbin Veterinary Research Institut | Harbin Veterinary Research Institute |
| EPI432059 | PB1 | China | 2010-Mar-07 | r2356   | Harbin Veterinary Research Institut | Harbin Veterinary Research Institute |
| EPI432035 | PB1 | China | 2010-Mar-02 | r2      | Harbin Veterinary Research Institut | Harbin Veterinary Research Institute |
| EPI432027 | PB1 | China | 2010-Mar-02 | r18     | Harbin Veterinary Research Institut | Harbin Veterinary Research Institute |
| EPI432003 | PB1 | China | 2010-Mar-02 | r168    | Harbin Veterinary Research Institut | Harbin Veterinary Research Institute |
| EPI431987 | PB1 | China | 2012-Feb-25 | r167    | Harbin Veterinary Research Institut | Harbin Veterinary Research Institute |
| EPI431979 | PB1 | China | 2012-Feb-25 | r16     | Harbin Veterinary Research Institut | Harbin Veterinary Research Institute |
| EPI431971 | PB1 | China | 2012-Feb-25 | r158    | Harbin Veterinary Research Institut | Harbin Veterinary Research Institute |
| EPI431955 | PB1 | China | 2012-Feb-25 | r157    | Harbin Veterinary Research Institut | Harbin Veterinary Research Institute |
| EPI431947 | PB1 | China | 2010-Feb-18 | r1568   | Harbin Veterinary Research Institut | Harbin Veterinary Research Institute |
| EPI431939 | PB1 | China | 2010-Feb-18 | r15678  | Harbin Veterinary Research Institut | Harbin Veterinary Research Institute |
| EPI431931 | PB1 | China | 2010-Feb-18 | r1567   | Harbin Veterinary Research Institut | Harbin Veterinary Research Institute |
| EPI431923 | PB1 | China | 2010-Feb-18 | r156    | Harbin Veterinary Research Institut | Harbin Veterinary Research Institute |
| EPI431915 | PB1 | China | 2010-Feb-18 | r15     | Harbin Veterinary Research Institut | Harbin Veterinary Research Institute |
| EPI431907 | PB1 | China | 2010-Feb-18 | r138    | Harbin Veterinary Research Institut | Harbin Veterinary Research Institute |
| EPI431899 | PB1 | China | 2010-Feb-10 | r1378   | Harbin Veterinary Research Institut | Harbin Veterinary Research Institute |
| EPI431883 | PB1 | China | 2010-Feb-10 | r1368   | Harbin Veterinary Research Institut | Harbin Veterinary Research Institute |
| EPI431875 | PB1 | China | 2010-Feb-10 | r13678  | Harbin Veterinary Research Institut | Harbin Veterinary Research Institute |
| EPI431867 | PB1 | China | 2010-Feb-10 | r1367   | Harbin Veterinary Research Institut | Harbin Veterinary Research Institute |
| EPI431851 | PB1 | China | 2010-Feb-05 | r1358   | Harbin Veterinary Research Institut | Harbin Veterinary Research Institute |
| EPI431843 | PB1 | China | 2010-Feb-05 | r13578  | Harbin Veterinary Research Institut | Harbin Veterinary Research Institute |

Supplementary Table 1

|           |     |              |             |                    |                                      |                                                  |
|-----------|-----|--------------|-------------|--------------------|--------------------------------------|--------------------------------------------------|
| EPI431835 | PB1 | China        | 2010-Feb-05 | r1357              | Harbin Veterinary Research Institut  | Harbin Veterinary Research Institute             |
| EPI431827 | PB1 | China        | 2010-Feb-05 | r13568             | Harbin Veterinary Research Institut  | Harbin Veterinary Research Institute             |
| EPI431819 | PB1 | China        | 2010-Feb-05 | r135678            | Harbin Veterinary Research Institut  | Harbin Veterinary Research Institute             |
| EPI431811 | PB1 | China        | 2010-Feb-05 | r13567             | Harbin Veterinary Research Institut  | Harbin Veterinary Research Institute             |
| EPI431803 | PB1 | China        | 2010-Jan-31 | r1356              | Harbin Veterinary Research Institut  | Harbin Veterinary Research Institute             |
| EPI431795 | PB1 | China        | 2010-Jan-31 | r135               | Harbin Veterinary Research Institut  | Harbin Veterinary Research Institute             |
| EPI431787 | PB1 | China        | 2010-Jan-31 | r13                | Harbin Veterinary Research Institut  | Harbin Veterinary Research Institute             |
| EPI431779 | PB1 | China        | 2010-Jan-31 | r128               | Harbin Veterinary Research Institut  | Harbin Veterinary Research Institute             |
| EPI431763 | PB1 | China        | 2010-Jan-31 | r127               | Harbin Veterinary Research Institut  | Harbin Veterinary Research Institute             |
| EPI431739 | PB1 | China        | 2010-Jan-26 | r1267              | Harbin Veterinary Research Institut  | Harbin Veterinary Research Institute             |
| EPI431731 | PB1 | China        | 2010-Jan-26 | r126               | Harbin Veterinary Research Institut  | Harbin Veterinary Research Institute             |
| EPI431723 | PB1 | China        | 2010-Jan-26 | r1258              | Harbin Veterinary Research Institut  | Harbin Veterinary Research Institute             |
| EPI431715 | PB1 | China        | 2010-Jan-26 | r12578             | Harbin Veterinary Research Institut  | Harbin Veterinary Research Institute             |
| EPI431707 | PB1 | China        | 2010-Jan-20 | r1257              | Harbin Veterinary Research Institut  | Harbin Veterinary Research Institute             |
| EPI431699 | PB1 | China        | 2010-Jan-20 | r12568             | Harbin Veterinary Research Institut  | Harbin Veterinary Research Institute             |
| EPI431691 | PB1 | China        | 2010-Jan-20 | r125678            | Harbin Veterinary Research Institut  | Harbin Veterinary Research Institute             |
| EPI431683 | PB1 | China        | 2010-Jan-20 | r12567             | Harbin Veterinary Research Institut  | Harbin Veterinary Research Institute             |
| EPI431659 | PB1 | China        | 2010-Jan-16 | r1238              | Harbin Veterinary Research Institut  | Harbin Veterinary Research Institute             |
| EPI431651 | PB1 | China        | 2010-Jan-16 | r12378             | Harbin Veterinary Research Institut  | Harbin Veterinary Research Institute             |
| EPI431643 | PB1 | China        | 2010-Jan-16 | r1237              | Harbin Veterinary Research Institut  | Harbin Veterinary Research Institute             |
| EPI431635 | PB1 | China        | 2010-Jan-16 | r12368             | Harbin Veterinary Research Institut  | Harbin Veterinary Research Institute             |
| EPI431619 | PB1 | China        | 2010-Jan-16 | r12367             | Harbin Veterinary Research Institut  | Harbin Veterinary Research Institute             |
| EPI431611 | PB1 | China        | 2010-Jan-10 | r1236              | Harbin Veterinary Research Institut  | Harbin Veterinary Research Institute             |
| EPI431603 | PB1 | China        | 2010-Jan-10 | r12358             | Harbin Veterinary Research Institut  | Harbin Veterinary Research Institute             |
| EPI431595 | PB1 | China        | 2010-Jan-10 | r123578            | Harbin Veterinary Research Institut  | Harbin Veterinary Research Institute             |
| EPI431587 | PB1 | China        | 2010-Jan-10 | r12357             | Harbin Veterinary Research Institut  | Harbin Veterinary Research Institute             |
| EPI431579 | PB1 | China        | 2010-Jan-10 | r123568            | Harbin Veterinary Research Institut  | Harbin Veterinary Research Institute             |
| EPI431555 | PB1 | China        | 2010-Jan-04 | r12356             | Harbin Veterinary Research Institut  | Harbin Veterinary Research Institute             |
| EPI431547 | PB1 | China        | 2010-Jan-04 | r1235              | Harbin Veterinary Research Institut  | Harbin Veterinary Research Institute             |
| EPI431539 | PB1 | China        | 2010-Jan-04 | r123               | Harbin Veterinary Research Institut  | Harbin Veterinary Research Institute             |
| EPI431531 | PB1 | China        | 2010-Jan-04 | r12                | Harbin Veterinary Research Institut  | Harbin Veterinary Research Institute             |
| EPI499443 | PB1 | Japan        | 2013-Nov-25 | A/SAPPORO/TH1/2013 | Virus Research Center, Sendai Med    | National Institute of Infectious Diseases (NIID) |
| EPI499445 | PB1 | Japan        | 2013-Nov-24 | A/SAPPORO/114/2013 | Sapporo City Institute of Public Hea | National Institute of Infectious Diseases (NIID) |
| EPI497666 | PB1 | United State | 2013-Jul-05 | A/Utah/07/2013     | Utah Department of Health            | Centers for Disease Control and Prevention       |



Supplementary Table 1

|           |     |               |             |                           |                                                                  |                                                                  |
|-----------|-----|---------------|-------------|---------------------------|------------------------------------------------------------------|------------------------------------------------------------------|
| EPI503930 | PB1 | Australia     | 2013-Jun-16 | A/Victoria/506/2013       | WHO Collaborating Centre for Reference and Research on Influenza | Centers for Disease Control and Prevention                       |
| EPI497483 | PB1 | China         | 2013-Dec-04 | A/Jiangxi-Donghu/346/2013 |                                                                  | WHO Chinese National Influenza Center                            |
| EPI492811 | PB1 | United States | 2013-Nov-04 | A/Mississippi/11/2013     | Mississippi Public Health Laboratory                             | Centers for Disease Control and Prevention                       |
| EPI503941 | PB1 | Costa Rica    | 2013-Jul-26 | A/Costa Rica/4700/2013    | Laboratorio Nacional de Influenza                                | Centers for Disease Control and Prevention                       |
| EPI492684 | PB1 | United States | 2013-Jul-10 | A/Massachusetts/11/2013   | Massachusetts Department of Public Health                        | Centers for Disease Control and Prevention                       |
| EPI539676 | PB1 | Australia     | 2013-Sep-23 | A/SOUTH AUSTRALIA/77/2013 | Institute of Medical and Veterinary Science                      | WHO Collaborating Centre for Reference and Research on Influenza |
| EPI489310 | PB1 | United States | 2013-Jul-10 | A/Massachusetts/11/2013   | Massachusetts Department of Public Health                        | Centers for Disease Control and Prevention                       |
| EPI489298 | PB1 | United States | 2013-Jul-05 | A/Utah/07/2013            | Utah Department of Health                                        | Centers for Disease Control and Prevention                       |
| EPI500846 | PB1 | Costa Rica    | 2013-Aug-05 | A/Costa Rica/5802/2013    | Laboratorio Nacional de Influenza                                | Centers for Disease Control and Prevention                       |
| EPI487730 | PB1 | United States | 2013-Oct-29 | A/Utah/10/2013            | Utah Department of Health                                        | Centers for Disease Control and Prevention                       |
| EPI486634 | PB1 | United States | 2013-Oct-09 | A/Louisiana/12/2013       | Louisiana Department of Health and Hospitals                     | Centers for Disease Control and Prevention                       |
| EPI503469 | PB1 | Hong Kong     | 2013-Sep-19 | A/Hong Kong/5008/2013     | Government Virus Unit                                            | Centers for Disease Control and Prevention                       |
| EPI485806 | PB1 | Costa Rica    | 2013-Jul-26 | A/Costa Rica/4700/2013    | Laboratorio Nacional de Influenza                                | Centers for Disease Control and Prevention                       |
| EPI485798 | PB1 | Costa Rica    | 2013-Jul-26 | A/Costa Rica/4700/2013    | Laboratorio Nacional de Influenza                                | Centers for Disease Control and Prevention                       |
| EPI485785 | PB1 | United States | 2013-Oct-09 | A/Louisiana/08/2013       | Louisiana Department of Health and Hospitals                     | Centers for Disease Control and Prevention                       |
| EPI485777 | PB1 | United States | 2013-Oct-07 | A/Louisiana/07/2013       | Louisiana Department of Health and Hospitals                     | Centers for Disease Control and Prevention                       |
| EPI485579 | PB1 | Cambodia      | 2013-Jan-25 | A/Cambodia/X0125302/2013  | Institut Pasteur in Cambodia                                     | Institut Pasteur in Cambodia                                     |
| EPI484681 | PB1 | Sweden        | 2011-Oct-06 | A/Stockholm/26/2011       |                                                                  | Swedish National Institute for Communicable Disease Control      |
| EPI484673 | PB1 | Sweden        | 2012-Mar-11 | A/Stockholm/14/2012       |                                                                  | Swedish National Institute for Communicable Disease Control      |
| EPI484649 | PB1 | Sweden        | 2011-Oct-31 | A/Stockholm/29/2011       |                                                                  | Swedish National Institute for Communicable Disease Control      |
| EPI484641 | PB1 | Sweden        | 2012-Apr-14 | A/Stockholm/19/2012       |                                                                  | Swedish National Institute for Communicable Disease Control      |
| EPI484633 | PB1 | Sweden        | 2011-Dec-26 | A/Stockholm/42/2011       |                                                                  | Swedish National Institute for Communicable Disease Control      |
| EPI484625 | PB1 | Sweden        | 2012-Jan-02 | A/Stockholm/1/2012        |                                                                  | Swedish National Institute for Communicable Disease Control      |
| EPI484617 | PB1 | Sweden        | 2010-Dec-13 | A/Stockholm/13/2010       |                                                                  | Swedish National Institute for Communicable Disease Control      |
| EPI484609 | PB1 | Sweden        | 2009-Jun-11 | A/Stockholm/45/2009       |                                                                  | Swedish National Institute for Communicable Disease Control      |
| EPI484571 | PB1 | Bangladesh    | 2013-May-07 | A/Bangladesh/9334/2013    | Institute of Epidemiology Disease Control and Prevention         | Centers for Disease Control and Prevention                       |
| EPI484735 | PB1 | Costa Rica    | 2013-Jul-23 | A/Costa Rica/4009/2013    | Laboratorio Nacional de Influenza                                | Centers for Disease Control and Prevention                       |
| EPI484550 | PB1 | Costa Rica    | 2013-Jul-23 | A/Costa Rica/4009/2013    | Laboratorio Nacional de Influenza                                | Centers for Disease Control and Prevention                       |
| EPI484539 | PB1 | United States | 2013-Jul-10 | A/Massachusetts/11/2013   | Massachusetts Department of Public Health                        | Centers for Disease Control and Prevention                       |
| EPI484522 | PB1 | Kenya         | 2013-Apr-29 | A/Kenya/118/2013          | CDC-Kenya                                                        | Centers for Disease Control and Prevention                       |
| EPI484412 | PB1 | Sweden        | 2013-Mar-10 | A/Sweden/136/2013         |                                                                  | Swedish National Institute for Communicable Disease Control      |
| EPI484404 | PB1 | Sweden        | 2013-Feb-24 | A/Sweden/135/2013         |                                                                  | Swedish National Institute for Communicable Disease Control      |
| EPI484396 | PB1 | Sweden        | 2013-Feb-22 | A/Sweden/134/2013         |                                                                  | Swedish National Institute for Communicable Disease Control      |
| EPI484388 | PB1 | Sweden        | 2013-Feb-18 | A/Sweden/133/2013         |                                                                  | Swedish National Institute for Communicable Disease Control      |

Supplementary Table 1

|           |     |               |             |                                |                                      |                                                                  |
|-----------|-----|---------------|-------------|--------------------------------|--------------------------------------|------------------------------------------------------------------|
| EPI484364 | PB1 | Sweden        | 2013-Feb-12 | A/Sweden/130/2013              |                                      | Swedish National Institute for Communicable Disease Control      |
| EPI484356 | PB1 | Sweden        | 2013-Feb-11 | A/Sweden/129/2013              |                                      | Swedish National Institute for Communicable Disease Control      |
| EPI484348 | PB1 | Sweden        | 2013-Feb-05 | A/Sweden/128/2013              |                                      | Swedish National Institute for Communicable Disease Control      |
| EPI484340 | PB1 | Sweden        | 2013-Jan-31 | A/Sweden/127/2013              |                                      | Swedish National Institute for Communicable Disease Control      |
| EPI484332 | PB1 | Sweden        | 2013-Jan-28 | A/Sweden/126/2013              |                                      | Swedish National Institute for Communicable Disease Control      |
| EPI484300 | PB1 | Sweden        | 2013-Jan-16 | A/Sweden/122/2013              |                                      | Swedish National Institute for Communicable Disease Control      |
| EPI484277 | PB1 | Sweden        | 2013-Jan-17 | A/Sweden/120/2013              | Swedish Institute for Infectious Dis | Swedish National Institute for Communicable Disease Control      |
| EPI484253 | PB1 | Sweden        | 2013-Jan-03 | A/Sweden/117/2013              | Swedish Institute for Infectious Dis | Swedish National Institute for Communicable Disease Control      |
| EPI484238 | PB1 | Sweden        | 2012-Dec-25 | A/Sweden/34/2012               | Swedish Institute for Infectious Dis | Swedish National Institute for Communicable Disease Control      |
| EPI484230 | PB1 | Sweden        | 2012-Dec-23 | A/Sweden/33/2012               | Swedish Institute for Infectious Dis | Swedish National Institute for Communicable Disease Control      |
| EPI484222 | PB1 | Sweden        | 2012-Dec-20 | A/Sweden/32/2012               | Swedish Institute for Infectious Dis | Swedish National Institute for Communicable Disease Control      |
| EPI484216 | PB1 | Sweden        | 2012-Dec-20 | A/Sweden/31/2012               |                                      | Swedish National Institute for Communicable Disease Control      |
| EPI482823 | PB1 | United State  | 2013-Oct-01 | A/Iowa/04/2013                 | Iowa State Hygienic Laboratory       | Centers for Disease Control and Prevention                       |
| EPI482797 | PB1 | United State  | 2009-Feb-13 | A/Iowa/02/2009                 | Iowa State Hygienic Laboratory       | Centers for Disease Control and Prevention                       |
| EPI482783 | PB1 | United State  | 2013-Sep-06 | A/Arkansas/15/2013             | Arkansas Department of Health        | Centers for Disease Control and Prevention                       |
| EPI477632 | PB1 | Australia     | 2013-Mar-11 | A/TOWNSVILLE/23/2013           |                                      | WHO Collaborating Centre for Reference and Research on Influenza |
| EPI477501 | PB1 | Australia     | 2013-Feb-09 | A/TOWNSVILLE/5/2013            | Queensland Health Scientific Serv    | WHO Collaborating Centre for Reference and Research on Influenza |
| EPI477485 | PB1 | Sri Lanka     | 2013-May-04 | A/SRI LANKA/30/2013            | Medical Research Institute           | WHO Collaborating Centre for Reference and Research on Influenza |
| EPI477477 | PB1 | Sri Lanka     | 2013-Feb-27 | A/SRI LANKA/27/2013            | Medical Research Institute           | WHO Collaborating Centre for Reference and Research on Influenza |
| EPI477469 | PB1 | Australia     | 2013-Mar-26 | A/DARWIN/56/2013               | Royal Darwin Hospital                | WHO Collaborating Centre for Reference and Research on Influenza |
| EPI477447 | PB1 | China         | 2013-Oct-14 | A/Zhejiang/DTID-ZJU10/2013     | The First Affiliated Hospital, Colle | Shanghai Zhijiang Biotechnology Co.,Ltd                          |
| EPI477408 | PB1 | China         | 2013-Oct-14 | A/Zhejiang/22/2013             | Zhejiang Provincial Center for Disea | Zhejiang Provincial Center for Disease Control and Prevention    |
| EPI477400 | PB1 | China         | 2013-Apr-24 | A/Zhejiang/20/2013             | Zhejiang Provincial Center for Disea | Zhejiang Provincial Center for Disease Control and Prevention    |
| EPI471100 | PB1 | United State  | 2013-Sep-06 | A/Arkansas/14/2013             | Arkansas Department of Health        | Centers for Disease Control and Prevention                       |
| EPI467446 | PB1 | Australia     | 2013-Jun-17 | A/Victoria/505/2013            | WHO Collaborating Centre for Refe    | Centers for Disease Control and Prevention                       |
| EPI467264 | PB1 | Australia     | 2013-May-23 | A/South Australia/17/2013      | WHO Collaborating Centre for Refe    | Centers for Disease Control and Prevention                       |
| EPI467216 | PB1 | United State  | 2013-Aug-21 | A/Indiana/21/2013              | Indiana State Department of Health   | Centers for Disease Control and Prevention                       |
| EPI499463 | PB1 | Japan         | 2013-May-29 | A/SHIZUOKA-C/99/2013           | Shizuoka City Institute of Environm  | National Institute of Infectious Diseases (NIID)                 |
| EPI468084 | PB1 | Puerto Rico   | 2013-Jun-14 | A/Puerto Rico/01/2013          | Puerto Rico Department of Health     | Centers for Disease Control and Prevention                       |
| EPI466903 | PB1 | American Sa   | 2013-Feb-22 | A/American Samoa/4786/2013     | State of Hawaii Department of Hea    | Centers for Disease Control and Prevention                       |
| EPI466895 | PB1 | Bolivia, Plur | 2013-Jun-08 | A/Bolivia/559/2013             | Instituto Nacional de Laboratorios   | Centers for Disease Control and Prevention                       |
| EPI466887 | PB1 | Ukraine       | 2013-Apr-06 | A/Ukraine/387/2013             | Institute of Epidemiology and Infec  | Centers for Disease Control and Prevention                       |
| EPI466872 | PB1 | Dominican R   | 2013-May-01 | A/Dominican Republic/7293/2013 | Laboratorio de Investigacion / Cent  | Centers for Disease Control and Prevention                       |
| EPI466864 | PB1 | United State  | 2013-Mar-06 | A/Maryland/04/2013             | Maryland Department of Health an     | Centers for Disease Control and Prevention                       |

Supplementary Table 1

|           |     |                    |             |                                |                                       |                                                                  |
|-----------|-----|--------------------|-------------|--------------------------------|---------------------------------------|------------------------------------------------------------------|
| EPI466835 | PB1 | Bolivia, Plur      | 2013-Jun-08 | A/Bolivia/559/2013             | Instituto Nacional de Laboratorios    | Centers for Disease Control and Prevention                       |
| EPI466827 | PB1 | United States      | 2013-Jul-05 | A/Utah/07/2013                 | Utah Department of Health             | Centers for Disease Control and Prevention                       |
| EPI468081 | PB1 | Dominican Republic | 2013-May-01 | A/Dominican Republic/7293/2013 | Laboratorio de Investigacion / Centro | Centers for Disease Control and Prevention                       |
| EPI466813 | PB1 | Haiti              | 2013-Jun-02 | A/Haiti/1790/2013              | Caribbean Epidemiology Center         | Centers for Disease Control and Prevention                       |
| EPI466047 | PB1 | Finland            | 2009-Nov-12 | A/Finland/721/2009(H1N1)       | Helsingin-Uusimaa Labotariokeskus     | Institute for Molecular Medicine Finland (FIMM)                  |
| EPI466031 | PB1 | Finland            | 2009-Nov-12 | A/Finland/719/2009(H1N1)       | Helsingin-Uusimaa Labotariokeskus     | Institute for Molecular Medicine Finland (FIMM)                  |
| EPI466015 | PB1 | Finland            | 2009-Nov-11 | A/Finland/717/2009(H1N1)       | Helsingin-Uusimaa Labotariokeskus     | Institute for Molecular Medicine Finland (FIMM)                  |
| EPI466007 | PB1 | Finland            | 2009-Oct-26 | A/Finland/716/2009(H1N1)       | Helsingin-Uusimaa Labotariokeskus     | Institute for Molecular Medicine Finland (FIMM)                  |
| EPI465999 | PB1 | Finland            | 2009-Dec-14 | A/Finland/715/2009(H1N1)       | Ita-Suomen Labotariokeskus            | Institute for Molecular Medicine Finland (FIMM)                  |
| EPI465991 | PB1 | Finland            | 2009-Nov-23 | A/Finland/714/2009(H1N1)       | Ita-Suomen Labotariokeskus            | Institute for Molecular Medicine Finland (FIMM)                  |
| EPI465983 | PB1 | Finland            | 2009-Nov-06 | A/Finland/713/2009(H1N1)       | Ita-Suomen Labotariokeskus            | Institute for Molecular Medicine Finland (FIMM)                  |
| EPI465371 | PB1 | United States      | 2013-Aug-03 | A/Indiana/11/2013              | Indiana State Department of Health    | Centers for Disease Control and Prevention                       |
| EPI465363 | PB1 | United States      | 2013-Jul-29 | A/Illinois/03/2013             | Illinois Department of Public Health  | Centers for Disease Control and Prevention                       |
| EPI464868 | PB1 | United States      | 2013-Jul-22 | A/Ohio/05/2013                 | Ohio Department of Health Labora      | Centers for Disease Control and Prevention                       |
| EPI461881 | PB1 | United States      | 2013-Jul-01 | A/Indiana/09/2013              | Indiana State Department of Health    | Centers for Disease Control and Prevention                       |
| EPI460821 | PB1 | Peru               | 2013-Apr-19 | A/Peru/106/2013                | US NAMRU-6                            | Centers for Disease Control and Prevention                       |
| EPI460765 | PB1 | China              | 2013-Apr-19 | A/Nanjing/3/2013               | Jiangsu Provincial Center for Disease | institution of microbiology                                      |
| EPI460740 | PB1 | United States      | 2013-Jun-20 | A/Indiana/04/2013              | Indiana State Department of Health    | Centers for Disease Control and Prevention                       |
| EPI451329 | PB1 | China              | 2013-May-01 | A/Shanghai/Patient5/2013       | Shanghai public health clinical cent  | Institute Pasteur of Shanghai, CAS                               |
| EPI451281 | PB1 | China              | 2013-May-01 | A/Shanghai/Patient3/2013       | Shanghai public health clinical cent  | Institute Pasteur of Shanghai, CAS                               |
| EPI451270 | PB1 | China              | 2013-May-01 | A/Shanghai/Patient6/2013       | Shanghai public health clinical cent  | Institute Pasteur of Shanghai, CAS                               |
| EPI451260 | PB1 | China              | 2013-May-01 | A/Shanghai/Patient14/2013      | Shanghai public health clinical cent  | Institute Pasteur of Shanghai, CAS                               |
| EPI451251 | PB1 | China              | 2013-May-01 | A/Shanghai/Patient2/2013       | Shanghai public health clinical cent  | Institute Pasteur of Shanghai, CAS                               |
| EPI451016 | PB1 |                    | 2013-May-01 | A/Shanghai/patient1/2013       | Shanghai public health clinical cent  | Institute Pasteur of Shanghai, CAS                               |
| EPI456673 | PB1 | China              | 2013-Apr-26 | A/Nanjing/M1/2013              | Jiangsu Provincial Center for Disease | institution of microbiology                                      |
| EPI450291 | PB1 | Australia          | 2013-Jan-09 | A/SOUTH AUSTRALIA/2/2013       | Institute of Medical and Veterinary   | WHO Collaborating Centre for Reference and Research on Influenza |
| EPI450280 | PB1 | Thailand           | 2012-Dec-03 | A/SONG KHLA/416/2012           | WHO National Influenza Centre, Na     | WHO Collaborating Centre for Reference and Research on Influenza |
| EPI450263 | PB1 | Australia          | 2012-Dec-24 | A/PERTH/298/2012               | Pathwest QE II Medical Centre         | WHO Collaborating Centre for Reference and Research on Influenza |
| EPI0      | PB1 | Australia          | 2013-Jan-14 | A/NEWCASTLE/1/2013             | John Hunter Hospital, Virology Unit   | WHO Collaborating Centre for Reference and Research on Influenza |
| EPI450226 | PB1 | Australia          | 2013-Jan-07 | A/BRISBANE/6/2013              | Queensland Health Scientific Servic   | WHO Collaborating Centre for Reference and Research on Influenza |
| EPI448093 | PB1 | Bangladesh         | 2011-Mar-07 | A/Bangladesh/5487/2011         | Institute of Epidemiology Disease C   | Centers for Disease Control and Prevention                       |
| EPI447636 | PB1 | China              | 2013-Apr-21 | A/Anhui/03/2013                |                                       | WHO Chinese National Influenza Center                            |
| EPI447643 | PB1 | China              | 2013-Apr-14 | A/Anhui/02/2013                |                                       | WHO Chinese National Influenza Center                            |
| EPI447657 | PB1 | China              | 2013-Apr-09 | A/Jiangsu/09/2013              |                                       | WHO Chinese National Influenza Center                            |

Supplementary Table 1

|           |     |             |             |                           |                                    |                                            |
|-----------|-----|-------------|-------------|---------------------------|------------------------------------|--------------------------------------------|
| EPI447664 | PB1 | China       | 2013-Apr-11 | A/Jiangsu/08/2013         |                                    | WHO Chinese National Influenza Center      |
| EPI447678 | PB1 | China       | 2013-Apr-10 | A/Jiangsu/06/2013         |                                    | WHO Chinese National Influenza Center      |
| EPI447685 | PB1 | China       | 2013-Apr-08 | A/Jiangsu/05/2013         |                                    | WHO Chinese National Influenza Center      |
| EPI447692 | PB1 | China       | 2013-Apr-25 | A/Hunan/02/2013           |                                    | WHO Chinese National Influenza Center      |
| EPI447699 | PB1 | China       | 2013-Apr-24 | A/Hunan/01/2013           |                                    | WHO Chinese National Influenza Center      |
| EPI447706 | PB1 | China       | 2013-Apr-24 | A/Jiangxi/01/2013         |                                    | WHO Chinese National Influenza Center      |
| EPI447713 | PB1 | China       | 2013-Apr-23 | A/Fujian/01/2013          |                                    | WHO Chinese National Influenza Center      |
| EPI447734 | PB1 | China       | 2013-Apr-10 | A/Shanghai/16/2013        |                                    | WHO Chinese National Influenza Center      |
| EPI447741 | PB1 | China       | 2013-Apr-09 | A/Shanghai/15/2013        |                                    | WHO Chinese National Influenza Center      |
| EPI447748 | PB1 | China       | 2013-Apr-03 | A/Zhejiang/02/2013        |                                    | WHO Chinese National Influenza Center      |
| EPI447755 | PB1 | China       | 2013-Apr-08 | A/Shanghai/9/2013         |                                    | WHO Chinese National Influenza Center      |
| EPI447762 | PB1 | China       | 2013-Apr-07 | A/Shanghai/8/2013         |                                    | WHO Chinese National Influenza Center      |
| EPI447769 | PB1 | China       | 2013-Apr-03 | A/Shanghai/17/2013        |                                    | WHO Chinese National Influenza Center      |
| EPI447777 | PB1 | China       | 2013-Apr-10 | A/Shanghai/14/2013        |                                    | WHO Chinese National Influenza Center      |
| EPI447784 | PB1 | China       | 2013-Apr-10 | A/Shanghai/13/2013        |                                    | WHO Chinese National Influenza Center      |
| EPI447793 | PB1 | China       | 2013-Apr-10 | A/Shanghai/12/2013        |                                    | WHO Chinese National Influenza Center      |
| EPI447801 | PB1 | China       | 2013-Apr-10 | A/Shanghai/11/2013        |                                    | WHO Chinese National Influenza Center      |
| EPI447809 | PB1 | China       | 2013-Apr-09 | A/Shanghai/10/2013        |                                    | WHO Chinese National Influenza Center      |
| EPI447822 | PB1 | China       | 2013-Apr-10 | A/Shanghai/06-A/2013      |                                    | WHO Chinese National Influenza Center      |
| EPI447836 | PB1 | China       | 2013-Apr-12 | A/Beijing/01-A/2013       |                                    | WHO Chinese National Influenza Center      |
| EPI447850 | PB1 | China       | 2013-Apr-05 | A/Jiangsu/04/2013         |                                    | WHO Chinese National Influenza Center      |
| EPI447863 | PB1 | China       | 2013-Apr-06 | A/Jiangsu/03/2013         |                                    | WHO Chinese National Influenza Center      |
| EPI447876 | PB1 | China       | 2013-Mar-31 | A/Jiangsu/02/2013         |                                    | WHO Chinese National Influenza Center      |
| EPI447910 | PB1 | China       | 2013-Apr-02 | A/shanghai/05/2013        |                                    | WHO Chinese National Influenza Center      |
| EPI447183 | PB1 | Russian Fed | 2013-Mar-20 | A/St. Petersburg/151/2013 | Russian Academy of Medical Scienc  | Centers for Disease Control and Prevention |
| EPI446153 | PB1 | Kenya       | 2010-Jun-12 | A/Nairobi/97/2010         | ARI Unit, Kenya Medical Research I | Kenya Medical Research Institute           |
| EPI446132 | PB1 | Kenya       | 2010-Jun-04 | A/Nairobi/72/2010         | ARI Unit, Kenya Medical Research I | Kenya Medical Research Institute           |
| EPI446124 | PB1 | Kenya       | 2010-Mar-25 | A/Nairobi/25/2010         | ARI Unit, Kenya Medical Research I | Kenya Medical Research Institute           |
| EPI446116 | PB1 | Kenya       | 2010-Mar-25 | A/Nairobi/24/2010         | ARI Unit, Kenya Medical Research I | Kenya Medical Research Institute           |
| EPI446108 | PB1 | Kenya       | 2010-Mar-20 | A/Nairobi/21/2010         | ARI Unit, Kenya Medical Research I | Kenya Medical Research Institute           |
| EPI446100 | PB1 | Kenya       | 2010-Mar-20 | A/Nairobi/20/2010         | ARI Unit, Kenya Medical Research I | Kenya Medical Research Institute           |
| EPI446092 | PB1 | Kenya       | 2010-Jan-21 | A/Kijabe/16/2010          | ARI Unit, Kenya Medical Research I | Kenya Medical Research Institute           |
| EPI446084 | PB1 | Kenya       | 2010-Mar-12 | A/Nairobi/11/2010         | ARI Unit, Kenya Medical Research I | Kenya Medical Research Institute           |
| EPI446076 | PB1 | Kenya       | 2009-Dec-09 | A/Nairobi/16/2009         | ARI Unit, Kenya Medical Research I | Kenya Medical Research Institute           |

Supplementary Table 1

|           |     |              |             |                        |                                      |                                                               |
|-----------|-----|--------------|-------------|------------------------|--------------------------------------|---------------------------------------------------------------|
| EPI446069 | PB1 | Kenya        | 2009-Nov-04 | A/Nairobi/3/2009       | ARI Unit, Kenya Medical Research I   | Kenya Medical Research Institute                              |
| EPI446055 | PB1 | Kenya        | 2009-Oct-27 | A/Kikuyu/184/2009      | ARI Unit, Kenya Medical Research I   | Kenya Medical Research Institute                              |
| EPI446048 | PB1 | Kenya        | 2009-Oct-12 | A/Kisii/115/2009       | ARI Unit, Kenya Medical Research I   | Kenya Medical Research Institute                              |
| EPI446041 | PB1 | Kenya        | 2009-Oct-15 | A/Kisii/143/2009       | ARI Unit, Kenya Medical Research I   | Kenya Medical Research Institute                              |
| EPI446034 | PB1 | Kenya        | 2009-Oct-29 | A/Kisii/205/2009       | ARI Unit, Kenya Medical Research I   | Kenya Medical Research Institute                              |
| EPI446018 | PB1 | Kenya        | 2009-Oct-03 | A/Nairobi/37/2009      | ARI Unit, Kenya Medical Research I   | Kenya Medical Research Institute                              |
| EPI446010 | PB1 | Kenya        | 2009-Oct-02 | A/Mombasa/27/2009      | ARI Unit, Kenya Medical Research I   | Kenya Medical Research Institute                              |
| EPI445994 | PB1 | Bangladesh   | 2011-Feb-26 | A/Bangladesh/0994/2011 | Institute of Epidemiology Disease C  | Centers for Disease Control and Prevention                    |
| EPI445910 | PB1 | Taiwan       | 2013-Apr-24 | A/Taiwan/1/2013        | National Influenza Center, Centers   | Taiwan CDC                                                    |
| EPI447190 | PB1 | United State | 2012-Oct-20 | A/New York/39/2012     | New York State Department of Hea     | Centers for Disease Control and Prevention                    |
| EPI445652 | PB1 | United State | 2013-Feb-20 | A/Alaska/02/2013       | Alaska State Virology Lab            | Centers for Disease Control and Prevention                    |
| EPI443707 | PB1 | United State | 2013-Jan-07 | A/Washington/07/2013   | Spokane Regional Health District     | Centers for Disease Control and Prevention                    |
| EPI443695 | PB1 | United State | 2003-Feb-13 | A/Wyoming/03/2003      | Iowa State Hygienic Laboratory       | Centers for Disease Control and Prevention                    |
| EPI443276 | PB1 | Kenya        | 2009-Oct-16 | A/Mombasa/148/2009     | ARI Unit, Kenya Medical Research I   | Kenya Medical Research Institute                              |
| EPI443269 | PB1 | Kenya        | 2009-Oct-27 | A/Mombasa/179/2009     | ARI Unit, Kenya Medical Research I   | Kenya Medical Research Institute                              |
| EPI443261 | PB1 | Kenya        | 2009-Oct-22 | A/Trans-Nzoia/168/2009 | ARI Unit, Kenya Medical Research I   | Kenya Medical Research Institute                              |
| EPI443253 | PB1 | Kenya        | 2010-Oct-27 | A/Nakuru/192/2009      | ARI Unit, Kenya Medical Research I   | Kenya Medical Research Institute                              |
| EPI443246 | PB1 | Kenya        | 2009-Sep-29 | A/Mombasa/512/2009     | ARI Unit, Kenya Medical Research I   | Kenya Medical Research Institute                              |
| EPI443239 | PB1 | Kenya        | 2009-Jul-30 | A/Kitale/532/2009      | ARI Unit, Kenya Medical Research I   | Kenya Medical Research Institute                              |
| EPI443231 | PB1 | Kenya        | 2009-Sep-30 | A/Kitale/531/2009      | ARI Unit, Kenya Medical Research I   | Kenya Medical Research Institute                              |
| EPI443224 | PB1 | Kenya        | 2009-Sep-29 | A/Meru/467/2009        | ARI Unit, Kenya Medical Research I   | Kenya Medical Research Institute                              |
| EPI443217 | PB1 | Kenya        | 2009-Sep-29 | A/Nyeri/478/2009       | ARI Unit, Kenya Medical Research I   | Kenya Medical Research Institute                              |
| EPI443210 | PB1 | Kenya        | 2009-Sep-22 | A/Embu/169/2009        | ARI Unit, Kenya Medical Research I   | Kenya Medical Research Institute                              |
| EPI443203 | PB1 | Kenya        | 2009-Sep-19 | A/Eldoret/120/2009     | ARI Unit, Kenya Medical Research I   | Kenya Medical Research Institute                              |
| EPI443182 | PB1 | Kenya        | 2009-Sep-15 | A/Nairobi/59/2009      | ARI Unit, Kenya Medical Research I   | Kenya Medical Research Institute                              |
| EPI443174 | PB1 | Kenya        | 2009-Sep-15 | A/Nairobi/58/2009      | ARI Unit, Kenya Medical Research I   | Kenya Medical Research Institute                              |
| EPI443167 | PB1 | Kenya        | 2009-Jul-05 | A/Keiyo/96/2009        | ARI Unit, Kenya Medical Research I   | Kenya Medical Research Institute                              |
| EPI443157 | PB1 | Kenya        | 2009-Jul-05 | A/Garissa/78/2009      | ARI Unit, Kenya Medical Research I   | Kenya Medical Research Institute                              |
| EPI443112 | PB1 | Kenya        | 2009-Jul-03 | A/Nairobi/64/2009      | ARI Unit, Kenya Medical Research I   | Kenya Medical Research Institute                              |
| EPI443065 | PB1 | Kenya        | 2009-Jul-02 | A/Kisumu/61/2009       | ARI Unit, Kenya Medical Research I   | Kenya Medical Research Institute                              |
| EPI443040 | PB1 | China        | 2013-Apr-03 | A/Zhejiang/2/2013      | Zhejiang Provincial Center for Disea | Zhejiang Provincial Center for Disease Control and Prevention |
| EPI443032 | PB1 | China        | 2013-Mar-24 | A/Zhejiang/1/2013      | Zhejiang Provincial Center for Disea | Zhejiang Provincial Center for Disease Control and Prevention |
| EPI447942 | PB1 | China        | 2013-Mar-25 | A/Zhejiang/01/2013     |                                      | WHO Chinese National Influenza Center                         |
| EPI447950 | PB1 | China        | 2013-Mar-09 | A/Shanghai/4/2013      |                                      | WHO Chinese National Influenza Center                         |

Supplementary Table 1

|           |     |              |             |                                 |                                       |                                                                  |
|-----------|-----|--------------|-------------|---------------------------------|---------------------------------------|------------------------------------------------------------------|
| EPI447960 | PB1 | China        | 2013-Feb-27 | A/Shanghai/3/2013               |                                       | WHO Chinese National Influenza Center                            |
| EPI443015 | PB1 | Kenya        | 2009-Jul-02 | A/Kisumu/56/2009                | ARI Unit, Kenya Medical Research I    | Kenyatta University                                              |
| EPI446456 | PB1 | China        | 2013-Apr-02 | A/Hangzhou/3/2013               | Hangzhou Center for Disease Contr     | Hangzhou Center for Disease Control and Prevention               |
| EPI446450 | PB1 | China        | 2013-Mar-25 | A/Hangzhou/2/2013               | Hangzhou Center for Disease Contr     | Hangzhou Center for Disease Control and Prevention               |
| EPI441600 | PB1 | China        | 2013-Mar-24 | A/Hangzhou/1/2013               | Hangzhou Center for Disease Contr     | Hangzhou Center for Disease Control and Prevention               |
| EPI439508 | PB1 | China        | 2013-Mar-20 | A/Anhui/1/2013                  |                                       | WHO Chinese National Influenza Center                            |
| EPI439489 | PB1 | China        | 2013-Feb-26 | A/Shanghai/1/2013               |                                       | WHO Chinese National Influenza Center                            |
| EPI438418 | PB1 | China        | 2012-Dec-12 | A/Hebei-Yuhua/SWL1250/2012 (H1N | China National Influenza Centre       | WHO Chinese National Influenza Center                            |
| EPI436259 | PB1 | United State | 2012-Oct-20 | A/New York/39/2012              | New York State Department of Hea      | Centers for Disease Control and Prevention                       |
| EPI420767 | PB1 | China        | 2013-Feb-09 | A/Guizhou/2/2013                | WHO Chinese National Influenza Ce     | China National Influenza Centre                                  |
| EPI420390 | PB1 | China        | 2013-Feb-08 | A/Guizhou/1/2013                | WHO Chinese National Influenza Ce     | China National Influenza Centre                                  |
| EPI418172 | PB1 | India        | 2012-Dec-22 | A/India/2192/2012               | All India Institute of Medical Scienc | Centers for Disease Control and Prevention                       |
| EPI418121 | PB1 | China        | 2012-Oct-04 | A/Beijing-Xicheng/12423/2012    | WHO Chinese National Influenza Ce     | Centers for Disease Control and Prevention                       |
| EPI450437 | PB1 | Australia    | 2012-Oct-06 | A/SOUTH AUSTRALIA/162/2012      | Institute of Medical and Veterinary   | WHO Collaborating Centre for Reference and Research on Influenza |
| EPI490085 | PB1 | United State | 2012-Nov-12 | A/Delaware/15/2012              | Delaware Public Health Lab            | Centers for Disease Control and Prevention                       |
| EPI418016 | PB1 | Australia    | 2011-Oct-24 | A/Victoria/361/2011             | WHO Collaborating Centre for Refe     | Centers for Disease Control and Prevention                       |
| EPI417229 | PB1 | United State | 2012-Oct-22 | A/Arizona/09/2012               | Arizona Department of Health Serv     | Centers for Disease Control and Prevention                       |
| EPI416143 | PB1 | United State | 2012-Dec-03 | A/Michigan/33/2012              | Michigan Department of Communi        | Centers for Disease Control and Prevention                       |
| EPI440093 | PB1 | United State | 2012-Nov-18 | A/Michigan/32/2012              | Michigan Department of Communi        | Centers for Disease Control and Prevention                       |
| EPI404994 | PB1 | United State | 2012-Apr-21 | A/Pennsylvania/09/2012          | Centers for Disease Control and Pr    | Centers for Disease Control and Prevention                       |
| EPI404987 | PB1 | United State | 2012-Apr-21 | A/Pennsylvania/09/2012          | Pennsylvania Department of Health     | Centers for Disease Control and Prevention                       |
| EPI418259 | PB1 | United State | 2012-Oct-18 | A/Iowa/14/2012                  | Iowa State Hygienic Laboratory        | Centers for Disease Control and Prevention                       |
| EPI404188 | PB1 | United State | 2012-Nov-17 | A/Iowa/16/2012                  | Iowa State Hygienic Laboratory        | Centers for Disease Control and Prevention                       |
| EPI439202 | PB1 | Bangladesh   | 2012-Jul-21 | A/Bangladesh/2021/2012          | Institute of Epidemiology Disease C   | Centers for Disease Control and Prevention                       |
| EPI400103 | PB1 | Kenya        | 2012-Mar-27 | A/Kenya/224/2012                | US Army Medical Research Unit - K     | USAMRU-K                                                         |
| EPI400080 | PB1 | Kenya        | 2012-Mar-16 | A/Kenya/223/2012                | US Army Medical Research Unit - K     | USAMRU-K                                                         |
| EPI398422 | PB1 | United State | 2012-Jul-09 | A/Hawaii/22/2012                | State of Hawaii Department of Hea     | Centers for Disease Control and Prevention                       |
| EPI398415 | PB1 | United State | 2012-Apr-15 | A/Texas/50/2012                 | Texas Department of State Health S    | Centers for Disease Control and Prevention                       |
| EPI397959 | PB1 | United State | 2012-Sep-10 | A/Ohio/88/2012                  | Ohio Department of Health Laborat     | Centers for Disease Control and Prevention                       |
| EPI397952 | PB1 | United State | 2012-Aug-27 | A/Ohio/85/2012                  | Ohio Department of Health Laborat     | Centers for Disease Control and Prevention                       |
| EPI397930 | PB1 | United State | 2012-Jul-29 | A/Ohio/19/2012                  | Ohio Department of Health Laborat     | Centers for Disease Control and Prevention                       |
| EPI397881 | PB1 | United State | 2012-Jul-09 | A/Hawaii/22/2012                | State of Hawaii Department of Hea     | Centers for Disease Control and Prevention                       |
| EPI398045 | PB1 | United State | 2012-Apr-15 | A/Texas/50/2012                 | Texas Department of State Health S    | Centers for Disease Control and Prevention                       |
| EPI397866 | PB1 | Australia    | 2009-Jul-05 | A/TASMANIA/2004/2009            | Royal Hobart Hospital                 | WHO Collaborating Centre for Reference and Research on Influenza |

Supplementary Table 1

|           |     |               |             |                        |                                                    |                                            |
|-----------|-----|---------------|-------------|------------------------|----------------------------------------------------|--------------------------------------------|
| EPI397749 | PB1 | United States | 2012-Aug-12 | A/Ohio/87/2012         | Ohio Department of Health Laboratory               | Centers for Disease Control and Prevention |
| EPI397660 | PB1 | United States | 2012-Aug-20 | A/Maryland/28/2012     | Maryland Department of Health and General Services | Centers for Disease Control and Prevention |
| EPI397560 | PB1 | United States | 2012-Aug-20 | A/Wisconsin/29/2012    | Wisconsin State Laboratory of Hygiene              | Centers for Disease Control and Prevention |
| EPI397546 | PB1 | United States | 2012-Sep-04 | A/Ohio/83/2012         | Ohio Department of Health Laboratory               | Centers for Disease Control and Prevention |
| EPI397538 | PB1 | United States | 2012-Aug-10 | A/Ohio/56/2012         | Ohio Department of Health Laboratory               | Centers for Disease Control and Prevention |
| EPI397530 | PB1 | United States | 2012-Aug-07 | A/Ohio/47/2012         | Ohio Department of Health Laboratory               | Centers for Disease Control and Prevention |
| EPI397522 | PB1 | United States | 2012-Aug-08 | A/Ohio/44/2012         | Ohio Department of Health Laboratory               | Centers for Disease Control and Prevention |
| EPI397514 | PB1 | United States | 2012-Aug-02 | A/Ohio/36/2012         | Ohio Department of Health Laboratory               | Centers for Disease Control and Prevention |
| EPI397653 | PB1 | United States | 2012-Aug-02 | A/Indiana/90/2012      | Indiana State Department of Health                 | Centers for Disease Control and Prevention |
| EPI397444 | PB1 | United States | 2012-Aug-22 | A/Wisconsin/31/2012    | Wisconsin State Laboratory of Hygiene              | Centers for Disease Control and Prevention |
| EPI397430 | PB1 | United States | 2012-Aug-17 | A/Ohio/81/2012         | Ohio Department of Health Laboratory               | Centers for Disease Control and Prevention |
| EPI397424 | PB1 | United States | 2012-Sep-05 | A/Minnesota/15/2012    | Minnesota Department of Health                     | Centers for Disease Control and Prevention |
| EPI397416 | PB1 | United States | 2012-Aug-16 | A/Michigan/23/2012     | Michigan Department of Community and Public Health | Centers for Disease Control and Prevention |
| EPI397410 | PB1 | United States | 2012-Aug-15 | A/Michigan/16/2012     | Michigan Department of Community and Public Health | Centers for Disease Control and Prevention |
| EPI397402 | PB1 | United States | 2012-Aug-03 | A/Indiana/99/2012      | Indiana State Department of Health                 | Centers for Disease Control and Prevention |
| EPI397394 | PB1 | United States | 2012-Aug-06 | A/Indiana/93/2012      | Indiana State Department of Health                 | Centers for Disease Control and Prevention |
| EPI397376 | PB1 | United States | 2012-Aug-04 | A/Indiana/123/2012     | Indiana State Department of Health                 | Centers for Disease Control and Prevention |
| EPI397349 | PB1 | United States | 2012-Aug-05 | A/Ohio/37/2012         | Ohio Department of Health Laboratory               | Centers for Disease Control and Prevention |
| EPI397337 | PB1 | United States | 2012-Jul-12 | A/Hawaii/03/2012       | State of Hawaii Department of Health               | Centers for Disease Control and Prevention |
| EPI397356 | PB1 | United States | 2012-Aug-10 | A/Ohio/63/2012         | Ohio Department of Health Laboratory               | Centers for Disease Control and Prevention |
| EPI397354 | PB1 | United States | 2012-Aug-05 | A/Ohio/57/2012         | Ohio Department of Health Laboratory               | Centers for Disease Control and Prevention |
| EPI396268 | PB1 | United States | 2012-Aug-03 | A/Indiana/133/2012     | Indiana State Department of Health                 | Centers for Disease Control and Prevention |
| EPI396260 | PB1 | United States | 2012-Aug-04 | A/Indiana/127/2012     | Indiana State Department of Health                 | Centers for Disease Control and Prevention |
| EPI396244 | PB1 | United States | 2012-Aug-03 | A/Indiana/125/2012     | Indiana State Department of Health                 | Centers for Disease Control and Prevention |
| EPI397094 | PB1 | United States | 2012-Aug-03 | A/Ohio/34/2012         | Ohio Department of Health Laboratory               | Centers for Disease Control and Prevention |
| EPI396228 | PB1 | United States | 2012-Aug-09 | A/Indiana/147/2012     | Indiana State Department of Health                 | Centers for Disease Control and Prevention |
| EPI397091 | PB1 | United States | 2012-Aug-02 | A/Indiana/57/2012      | Indiana State Department of Health                 | Centers for Disease Control and Prevention |
| EPI396199 | PB1 | United States | 2012-Aug-09 | A/Ohio/79/2012         | Ohio Department of Health Laboratory               | Centers for Disease Control and Prevention |
| EPI396190 | PB1 | United States | 2012-Aug-15 | A/Ohio/77/2012         | Ohio Department of Health Laboratory               | Centers for Disease Control and Prevention |
| EPI396181 | PB1 | United States | 2012-Aug-02 | A/Indiana/77/2012      | Indiana State Department of Health                 | Centers for Disease Control and Prevention |
| EPI396174 | PB1 | United States | 2012-Aug-19 | A/Ohio/80/2012         | Ohio Department of Health Laboratory               | Centers for Disease Control and Prevention |
| EPI396168 | PB1 | United States | 2012-Aug-16 | A/Michigan/19/2012     | Michigan Department of Community and Public Health | Centers for Disease Control and Prevention |
| EPI397109 | PB1 | United States | 2012-Aug-23 | A/Pennsylvania/17/2012 | Pennsylvania Department of Health                  | Centers for Disease Control and Prevention |
| EPI395349 | PB1 | United States | 2012-Aug-16 | A/Michigan/20/2012     | Michigan Department of Community and Public Health | Centers for Disease Control and Prevention |

Supplementary Table 1

|           |     |               |             |                         |                                                                  |                                                                  |
|-----------|-----|---------------|-------------|-------------------------|------------------------------------------------------------------|------------------------------------------------------------------|
| EPI397110 | PB1 | United States | 2012-Aug-28 | A/Wisconsin/28/2012     | Wisconsin State Laboratory of Hygiene                            | Centers for Disease Control and Prevention                       |
| EPI395326 | PB1 | United States | 2011-Nov-21 | A/West Virginia/06/2011 | West Virginia Office of Laboratory Medicine                      | Centers for Disease Control and Prevention                       |
| EPI395311 | PB1 | United States | 2012-Aug-16 | A/Missouri/12/2012      | Missouri Department of Health & Senior Services                  | Centers for Disease Control and Prevention                       |
| EPI395292 | PB1 | United States | 2012-Aug-18 | A/Maryland/25/2012      | Maryland Department of Health and General Services               | Centers for Disease Control and Prevention                       |
| EPI395265 | PB1 | United States | 2012-Aug-11 | A/Ohio/65/2012          | Ohio Department of Health Laboratory                             | Centers for Disease Control and Prevention                       |
| EPI395257 | PB1 | United States | 2012-Aug-04 | A/Ohio/35/2012          | Ohio Department of Health Laboratory                             | Centers for Disease Control and Prevention                       |
| EPI395249 | PB1 | United States | 2012-Aug-10 | A/Indiana/152/2012      | Indiana State Department of Health                               | Centers for Disease Control and Prevention                       |
| EPI394943 | PB1 | United States | 2012-Aug-16 | A/Maryland/22/2012      | Maryland Department of Health and General Services               | Centers for Disease Control and Prevention                       |
| EPI395275 | PB1 | United States | 2012-Aug-16 | A/Ohio/75/2012          | Ohio Department of Health Laboratory                             | Centers for Disease Control and Prevention                       |
| EPI394931 | PB1 | United States | 2012-Aug-15 | A/Wisconsin/23/2012     | Wisconsin State Laboratory of Hygiene                            | Centers for Disease Control and Prevention                       |
| EPI394924 | PB1 | United States | 2012-Aug-14 | A/Illinois/11/2012      | Illinois Department of Public Health                             | Centers for Disease Control and Prevention                       |
| EPI394919 | PB1 | United States | 2012-Aug-13 | A/Ohio/69/2012          | Ohio Department of Health Laboratory                             | Centers for Disease Control and Prevention                       |
| EPI394911 | PB1 | United States | 2012-Aug-03 | A/Indiana/132/2012      | Indiana State Department of Health                               | Centers for Disease Control and Prevention                       |
| EPI394881 | PB1 | Australia     | 2012-Jun-11 | A/Victoria/523/2012     | WHO Collaborating Centre for Reference and Research on Influenza | Centers for Disease Control and Prevention                       |
| EPI450442 | PB1 | Sri Lanka     | 2012-Jan-01 | A/SRI LANKA/22/2012     | Medical Research Institute                                       | WHO Collaborating Centre for Reference and Research on Influenza |
| EPI450427 | PB1 | Singapore     | 2012-Jun-22 | A/SINGAPORE/12/2012     | National Public Health Laboratory                                | WHO Collaborating Centre for Reference and Research on Influenza |
| EPI450417 | PB1 | Fiji          | 2012-Jul-16 | A/FIJI/4/2012           | National Centre for Scientific Services                          | WHO Collaborating Centre for Reference and Research on Influenza |
| EPI450422 | PB1 | Malaysia      | 2012-Jan-01 | A/MALAYSIA/192/2012     | Institut Penyelidikan Perubatan                                  | WHO Collaborating Centre for Reference and Research on Influenza |
| EPI539651 | PB1 | New Zealand   | 2012-Jul-07 | A/CHRISTCHURCH/516/2012 | Canterbury Health Services                                       | WHO Collaborating Centre for Reference and Research on Influenza |
| EPI394147 | PB1 | New Zealand   | 2012-Jul-03 | A/CHRISTCHURCH/503/2012 | Canterbury Health Services                                       | WHO Collaborating Centre for Reference and Research on Influenza |
| EPI394136 | PB1 | Australia     | 2012-Jun-26 | A/TASMANIA/26/2012      | Royal Hobart Hospital                                            | WHO Collaborating Centre for Reference and Research on Influenza |
| EPI394122 | PB1 | New Caledonia | 2012-Mar-26 | A/NEW CALEDONIA/1/2012  | Institut Pasteur New Caledonia                                   | WHO Collaborating Centre for Reference and Research on Influenza |
| EPI394075 | PB1 | United States | 2012-Aug-17 | A/Wisconsin/27/2012     | Wisconsin State Laboratory of Hygiene                            | Centers for Disease Control and Prevention                       |
| EPI393780 | PB1 | United States | 2012-Aug-25 | A/Ohio/74/2012          | Ohio Department of Health Laboratory                             | Centers for Disease Control and Prevention                       |
| EPI393772 | PB1 | United States | 2012-Apr-17 | A/New York/34/2012      | New York State Department of Health                              | Centers for Disease Control and Prevention                       |
| EPI418242 | PB1 | United States | 2012-Jun-17 | A/Washington/24/2012    | Washington State Public Health Laboratory                        | Centers for Disease Control and Prevention                       |
| EPI393766 | PB1 | United States | 2012-Apr-01 | A/Maryland/13/2012      | Maryland Department of Health and General Services               | Centers for Disease Control and Prevention                       |
| EPI393708 | PB1 | United States | 2012-Aug-26 | A/Minnesota/12/2012     | Minnesota Department of Health                                   | Centers for Disease Control and Prevention                       |
| EPI393700 | PB1 | United States | 2012-Aug-10 | A/Ohio/64/2012          | Ohio Department of Health Laboratory                             | Centers for Disease Control and Prevention                       |
| EPI393693 | PB1 | United States | 2012-Aug-09 | A/West Virginia/16/2012 | West Virginia Office of Laboratory Medicine                      | Centers for Disease Control and Prevention                       |
| EPI393679 | PB1 | United States | 2012-Aug-06 | A/West Virginia/10/2012 | West Virginia Office of Laboratory Medicine                      | Centers for Disease Control and Prevention                       |
| EPI395285 | PB1 | United States | 2012-Aug-13 | A/Ohio/71/2012          | Ohio Department of Health Laboratory                             | Centers for Disease Control and Prevention                       |
| EPI393665 | PB1 | United States | 2012-Aug-01 | A/Ohio/28/2012          | Ohio Department of Health Laboratory                             | Centers for Disease Control and Prevention                       |
| EPI393660 | PB1 | United States | 2012-Aug-13 | A/Ohio/62/2012          | Ohio Department of Health Laboratory                             | Centers for Disease Control and Prevention                       |



Supplementary Table 1

|           |     |                  |             |                            |                                                                  |                                                                  |
|-----------|-----|------------------|-------------|----------------------------|------------------------------------------------------------------|------------------------------------------------------------------|
| EPI393517 | PB1 | United States    | 2012-Aug-02 | A/Indiana/65/2012          | Indiana State Department of Health                               | Centers for Disease Control and Prevention                       |
| EPI393509 | PB1 | United States    | 2012-Aug-05 | A/Ohio/52/2012             | Ohio Department of Health Laboratory                             | Centers for Disease Control and Prevention                       |
| EPI393309 | PB1 | United States    | 2012-Aug-06 | A/West Virginia/09/2012    | West Virginia Office of Laboratory Science                       | Centers for Disease Control and Prevention                       |
| EPI393287 | PB1 | Spain            | 2008-Nov-12 | A/Aragon/RR3218/2008       | Instituto de Salud Carlos III                                    | Centre for Infections, Health Protection Agency                  |
| EPI392924 | PB1 | United States    | 2012-Aug-16 | A/Maryland/20/2012         | Maryland Department of Health and General Services               | Centers for Disease Control and Prevention                       |
| EPI392746 | PB1 | United States    | 2012-Aug-13 | A/Wisconsin/22/2012        | Wisconsin State Laboratory of Hygiene                            | Centers for Disease Control and Prevention                       |
| EPI392733 | PB1 | United States    | 2012-Aug-15 | A/Pennsylvania/13/2012     | Pennsylvania Department of Health                                | Centers for Disease Control and Prevention                       |
| EPI392727 | PB1 | United States    | 2012-Aug-10 | A/Michigan/14/2012         | Michigan Department of Community Health                          | Centers for Disease Control and Prevention                       |
| EPI392722 | PB1 | United States    | 2012-Aug-05 | A/Kentucky/11/2012         | Kentucky Division of Laboratory Services                         | Centers for Disease Control and Prevention                       |
| EPI393521 | PB1 | United States    | 2012-Aug-06 | A/Illinois/09/2012         | Illinois Department of Public Health                             | Centers for Disease Control and Prevention                       |
| EPI393535 | PB1 | United States    | 2012-Aug-02 | A/Indiana/59/2012          | Indiana State Department of Health                               | Centers for Disease Control and Prevention                       |
| EPI397917 | PB1 | United States    | 2012-Jul-28 | A/Ohio/17/2012             | Ohio Department of Health Laboratory                             | Centers for Disease Control and Prevention                       |
| EPI388361 | PB1 | United States    | 2012-Jul-31 | A/Indiana/16/2012          | Indiana State Department of Health                               | Centers for Disease Control and Prevention                       |
| EPI392750 | PB1 | United States    | 2012-Jul-29 | A/Indiana/20/2012          | Indiana State Department of Health                               | Centers for Disease Control and Prevention                       |
| EPI388344 | PB1 | United States    | 2012-Jul-29 | A/Indiana/15/2012          | Indiana State Department of Health                               | Centers for Disease Control and Prevention                       |
| EPI388317 | PB1 | United States    | 2012-Jul-28 | A/Ohio/20/2012             | Ohio Department of Health Laboratory                             | Centers for Disease Control and Prevention                       |
| EPI388310 | PB1 | United States    | 2012-Jul-28 | A/Ohio/15/2012             | Ohio Department of Health Laboratory                             | Centers for Disease Control and Prevention                       |
| EPI388303 | PB1 | United States    | 2012-Jul-29 | A/Ohio/14/2012             | Ohio Department of Health Laboratory                             | Centers for Disease Control and Prevention                       |
| EPI388288 | PB1 | United States    | 2012-Jul-30 | A/Indiana/17/2012          | Indiana State Department of Health                               | Centers for Disease Control and Prevention                       |
| EPI439211 | PB1 | United States    | 2012-Mar-28 | A/Colorado/14/2012         | Colorado Department of Health and Human Services                 | Centers for Disease Control and Prevention                       |
| EPI397577 | PB1 | United States    | 2012-Mar-08 | A/Ohio/02/2012             | WHO Collaborating Centre for Reference and Research on Influenza | Centers for Disease Control and Prevention                       |
| EPI384817 | PB1 | United States    | 2012-Jan-30 | A/Rhode Island/01/2012     | Rhode Island Department of Health                                | Centers for Disease Control and Prevention                       |
| EPI381871 | PB1 | United States    | 2012-Jul-12 | A/Hawaii/03/2012           | State of Hawaii Department of Health                             | Centers for Disease Control and Prevention                       |
| EPI381855 | PB1 | United States    | 2012-Jul-27 | A/Ohio/13/2012             | Ohio Department of Health Laboratory                             | Centers for Disease Control and Prevention                       |
| EPI381847 | PB1 | United States    | 2012-Jul-27 | A/Indiana/12/2012          | Indiana State Department of Health                               | Centers for Disease Control and Prevention                       |
| EPI379590 | PB1 | Australia        | 2012-Apr-24 | A/BRISBANE/39/2012         | Queensland Health Scientific Services                            | WHO Collaborating Centre for Reference and Research on Influenza |
| EPI450432 | PB1 | Thailand         | 2012-Mar-06 | A/SONG KHLA/40/2012        | WHO National Influenza Centre, Nakhon Phanom                     | WHO Collaborating Centre for Reference and Research on Influenza |
| EPI379506 | PB1 | Papua New Guinea | 2012-Mar-05 | A/GOROKA/5/2012            | Papua New Guinea Institute of Medical Research                   | WHO Collaborating Centre for Reference and Research on Influenza |
| EPI394050 | PB1 | Australia        | 2012-May-10 | A/SOUTH AUSTRALIA/30/2012  | Institute of Medical and Veterinary Science                      | WHO Collaborating Centre for Reference and Research on Influenza |
| EPI379445 | PB1 | Australia        | 2012-Apr-08 | A/PERTH/41/2012            | Pathwest QE II Medical Centre                                    | WHO Collaborating Centre for Reference and Research on Influenza |
| EPI378513 | PB1 | United States    | 2012-Jul-16 | A/Indiana/07/2012          | Indiana State Department of Health                               | Centers for Disease Control and Prevention                       |
| EPI378500 | PB1 | United States    | 2012-Jul-16 | A/Indiana/07/2012          | Indiana State Department of Health                               | Centers for Disease Control and Prevention                       |
| EPI377002 | PB1 | Australia        | 2011-Nov-18 | A/SOUTH AUSTRALIA/313/2011 | Institute of Medical and Veterinary Science                      | WHO Collaborating Centre for Reference and Research on Influenza |
| EPI376892 | PB1 | Australia        | 2012-Jan-21 | A/TOWNSVILLE/1/2012        | Queensland Health Scientific Services                            | WHO Collaborating Centre for Reference and Research on Influenza |

Supplementary Table 1

|           |     |               |             |                          |                                           |                                                                        |
|-----------|-----|---------------|-------------|--------------------------|-------------------------------------------|------------------------------------------------------------------------|
| EPI376884 | PB1 | Australia     | 2012-Feb-20 | A/TASMANIA/1/2012        | Royal Hobart Hospital                     | WHO Collaborating Centre for Reference and Research on Influenza       |
| EPI377528 | PB1 | United States | 2012-Apr-26 | A/North Carolina/18/2012 | North Carolina State Laboratory of Health | Centers for Disease Control and Prevention                             |
| EPI375502 | PB1 | Hong Kong     | 2012-May-28 | A/Hong Kong/5923/2012    | Public Health Laboratory Services Branch  | Public Health Laboratory Services Branch, Centre for Health Protection |
| EPI372961 | PB1 | Egypt         | 2011-Oct-30 | A/Egypt/N10621/2011      | U.S. Naval Medical Research Unit No. 3    | Centers for Disease Control and Prevention                             |
| EPI372937 | PB1 | Egypt         | 2011-Dec-01 | A/Egypt/N11126/2011      | U.S. Naval Medical Research Unit No. 3    | Centers for Disease Control and Prevention                             |
| EPI372921 | PB1 | Egypt         | 2011-Jan-01 | A/Egypt/N7724/2011       | U.S. Naval Medical Research Unit No. 3    | Centers for Disease Control and Prevention                             |
| EPI372913 | PB1 | Egypt         | 2011-Jan-01 | A/Egypt/N7592/2011       | U.S. Naval Medical Research Unit No. 3    | Centers for Disease Control and Prevention                             |
| EPI372905 | PB1 | Egypt         | 2011-Jan-01 | A/Egypt/N7562/2011       | U.S. Naval Medical Research Unit No. 3    | Centers for Disease Control and Prevention                             |
| EPI372889 | PB1 | Egypt         | 2011-Jan-01 | A/Egypt/N6828/2011       | U.S. Naval Medical Research Unit No. 3    | Centers for Disease Control and Prevention                             |
| EPI372881 | PB1 | Egypt         | 2011-Jan-01 | A/Egypt/N6774/2011       | U.S. Naval Medical Research Unit No. 3    | Centers for Disease Control and Prevention                             |
| EPI372865 | PB1 | Egypt         | 2011-Jan-01 | A/Egypt/N6658/2011       | U.S. Naval Medical Research Unit No. 3    | Centers for Disease Control and Prevention                             |
| EPI372857 | PB1 | Egypt         | 2011-Jan-01 | A/Egypt/N6322/2011       | U.S. Naval Medical Research Unit No. 3    | Centers for Disease Control and Prevention                             |
| EPI372849 | PB1 | Egypt         | 2011-Jan-01 | A/Egypt/N0544/2011       | U.S. Naval Medical Research Unit No. 3    | Centers for Disease Control and Prevention                             |
| EPI372843 | PB1 | Egypt         | 2010-Mar-07 | A/Egypt/N03072/2010      | U.S. Naval Medical Research Unit No. 3    | Centers for Disease Control and Prevention                             |
| EPI372837 | PB1 | Egypt         | 2010-Mar-03 | A/Egypt/N03071/2010      | U.S. Naval Medical Research Unit No. 3    | Centers for Disease Control and Prevention                             |
| EPI372831 | PB1 | Egypt         | 2010-Feb-23 | A/Egypt/N02554/2010      | U.S. Naval Medical Research Unit No. 3    | Centers for Disease Control and Prevention                             |
| EPI372825 | PB1 | Egypt         | 2010-Feb-13 | A/Egypt/N02127/2010      | U.S. Naval Medical Research Unit No. 3    | Centers for Disease Control and Prevention                             |
| EPI372819 | PB1 | Egypt         | 2010-Feb-15 | A/Egypt/N02038/2010      | U.S. Naval Medical Research Unit No. 3    | Centers for Disease Control and Prevention                             |
| EPI372801 | PB1 | Egypt         | 2010-Feb-02 | A/Egypt/N01360/2010      | U.S. Naval Medical Research Unit No. 3    | Centers for Disease Control and Prevention                             |
| EPI372795 | PB1 | Egypt         | 2009-Nov-22 | A/Egypt/N11981/2009      | U.S. Naval Medical Research Unit No. 3    | Centers for Disease Control and Prevention                             |
| EPI372789 | PB1 | Egypt         | 2009-Apr-19 | A/Egypt/3450-NAMRU3/2009 | U.S. Naval Medical Research Unit No. 3    | Centers for Disease Control and Prevention                             |
| EPI372783 | PB1 | Egypt         | 2009-May-11 | A/Egypt/4394-NAMRU3/2009 | U.S. Naval Medical Research Unit No. 3    | Centers for Disease Control and Prevention                             |
| EPI372777 | PB1 | Egypt         | 2009-May-17 | A/Egypt/4396-NAMRU3/2009 | U.S. Naval Medical Research Unit No. 3    | Centers for Disease Control and Prevention                             |
| EPI372771 | PB1 | Egypt         | 2009-Mar-30 | A/Egypt/3228-NAMRU3/2009 | U.S. Naval Medical Research Unit No. 3    | Centers for Disease Control and Prevention                             |
| EPI372759 | PB1 | Egypt         | 2009-Mar-24 | A/Egypt/2752-NAMRU3/2009 | U.S. Naval Medical Research Unit No. 3    | Centers for Disease Control and Prevention                             |
| EPI372745 | PB1 | Egypt         | 2009-May-31 | A/Egypt/4979-NAMRU3/2009 | U.S. Naval Medical Research Unit No. 3    | Centers for Disease Control and Prevention                             |
| EPI372727 | PB1 | Egypt         | 2009-Sep-16 | A/Egypt/9539-NAMRU3/2009 | U.S. Naval Medical Research Unit No. 3    | Centers for Disease Control and Prevention                             |
| EPI372713 | PB1 | Egypt         | 2009-May-18 | A/Egypt/9538-NAMRU3/2009 | U.S. Naval Medical Research Unit No. 3    | Centers for Disease Control and Prevention                             |
| EPI372701 | PB1 | Egypt         | 2009-Jan-01 | A/Egypt/0001-NAMRU3/2009 | U.S. Naval Medical Research Unit No. 3    | Centers for Disease Control and Prevention                             |
| EPI372689 | PB1 | Egypt         | 2009-Jan-01 | A/Egypt/1310-NAMRU3/2009 | U.S. Naval Medical Research Unit No. 3    | Centers for Disease Control and Prevention                             |
| EPI372683 | PB1 | Egypt         | 2009-Jan-01 | A/Egypt/0606-NAMRU3/2009 | U.S. Naval Medical Research Unit No. 3    | Centers for Disease Control and Prevention                             |
| EPI372665 | PB1 | Egypt         | 2008-Jan-01 | A/Egypt/3300-NAMRU3/2008 | U.S. Naval Medical Research Unit No. 3    | Centers for Disease Control and Prevention                             |
| EPI372657 | PB1 | Egypt         | 2008-Jan-01 | A/Egypt/2472-NAMRU3/2008 | U.S. Naval Medical Research Unit No. 3    | Centers for Disease Control and Prevention                             |
| EPI372645 | PB1 | Egypt         | 2008-Mar-02 | A/Egypt/2289-NAMRU3/2008 | U.S. Naval Medical Research Unit No. 3    | Centers for Disease Control and Prevention                             |

Supplementary Table 1

|           |     |               |             |                          |                                     |                                                                  |
|-----------|-----|---------------|-------------|--------------------------|-------------------------------------|------------------------------------------------------------------|
| EPI372639 | PB1 | Egypt         | 2008-Feb-26 | A/Egypt/1980-NAMRU3/2008 | U.S. Naval Medical Research Unit N  | Centers for Disease Control and Prevention                       |
| EPI372627 | PB1 | Egypt         | 2007-Dec-29 | A/Egypt/0216-NAMRU3/2007 | U.S. Naval Medical Research Unit N  | Centers for Disease Control and Prevention                       |
| EPI372615 | PB1 | Egypt         | 2007-Dec-24 | A/Egypt/0211-NAMRU3/2007 | U.S. Naval Medical Research Unit N  | Centers for Disease Control and Prevention                       |
| EPI372609 | PB1 | Egypt         | 2007-Jul-21 | A/Egypt/6251-NAMRU3/2007 | U.S. Naval Medical Research Unit N  | Centers for Disease Control and Prevention                       |
| EPI372597 | PB1 | Egypt         | 2007-Jun-21 | A/Egypt/4226-NAMRU3/2007 | U.S. Naval Medical Research Unit N  | Centers for Disease Control and Prevention                       |
| EPI372591 | PB1 | Egypt         | 2007-Feb-28 | A/Egypt/902-NAMRU3/2007  | U.S. Naval Medical Research Unit N  | Centers for Disease Control and Prevention                       |
| EPI372585 | PB1 | Egypt         | 2007-Mar-13 | A/Egypt/321-NAMRU3/2007  | U.S. Naval Medical Research Unit N  | Centers for Disease Control and Prevention                       |
| EPI372579 | PB1 | Egypt         | 2007-Feb-05 | A/Egypt/394-NAMRU3/2007  | U.S. Naval Medical Research Unit N  | Centers for Disease Control and Prevention                       |
| EPI371817 | PB1 | United States | 2012-Mar-06 | A/Michigan/03/2012       | Michigan Department of Communi      | Centers for Disease Control and Prevention                       |
| EPI371800 | PB1 | United States | 2012-Feb-16 | A/New Mexico/07/2012     | New Mexico Department of Health     | Centers for Disease Control and Prevention                       |
| EPI371790 | PB1 | United States | 2012-Feb-20 | A/California/22/2012     | California Department of Health Se  | Centers for Disease Control and Prevention                       |
| EPI371774 | PB1 | United States | 2012-Mar-30 | A/Nevada/12/2012         | Southern Nevada Public Health Lab   | Centers for Disease Control and Prevention                       |
| EPI370405 | PB1 | United States | 2012-Feb-23 | A/Texas/27/2012          | Texas Childrens Hospital            | Centers for Disease Control and Prevention                       |
| EPI376926 | PB1 | Cambodia      | 2011-Nov-17 | A/CAMBODIA/74/2011       | USAMC-AFRIMS Department of Vir      | WHO Collaborating Centre for Reference and Research on Influenza |
| EPI370305 | PB1 | Australia     | 2011-Aug-23 | A/PERTH/299/2011         | Pathwest QE II Medical Centre       | WHO Collaborating Centre for Reference and Research on Influenza |
| EPI394053 | PB1 | Australia     | 2011-Dec-16 | A/TOWNSVILLE/133/2011    | Queensland Health Scientific Servic | WHO Collaborating Centre for Reference and Research on Influenza |
| EPI368641 | PB1 | United States | 2012-Feb-21 | A/Texas/26/2012          | Corpus Christi-Nueces County Publ   | Centers for Disease Control and Prevention                       |
| EPI368667 | PB1 | United States | 2012-Feb-27 | A/Florida/06/2012        | Florida Department of Health-Tam    | Centers for Disease Control and Prevention                       |
| EPI368435 | PB1 | United States | 2012-Mar-01 | A/North Carolina/09/2012 | North Carolina State Laboratory of  | Centers for Disease Control and Prevention                       |
| EPI363017 | PB1 | United States | 2012-Jan-25 | A/California/17/2012     | California Department of Health Se  | Centers for Disease Control and Prevention                       |
| EPI398411 | PB1 | United States | 2012-Feb-26 | A/Texas/22/2012          | Dallas County Health and Human S    | Centers for Disease Control and Prevention                       |
| EPI359562 | PB1 | United States | 2012-Mar-05 | A/Maryland/06/2012       | Maryland Department of Health an    | Centers for Disease Control and Prevention                       |
| EPI370179 | PB1 | Australia     | 2011-Oct-20 | A/BRISBANE/395/2011      | Queensland Health Scientific Servic | WHO Collaborating Centre for Reference and Research on Influenza |
| EPI370178 | PB1 | Australia     | 2011-Sep-06 | A/BRISBANE/382/2011      | Queensland Health Scientific Servic | WHO Collaborating Centre for Reference and Research on Influenza |
| EPI370186 | PB1 | Australia     | 2011-Sep-17 | A/PERTH/219/2011         | Pathwest QE II Medical Centre       | WHO Collaborating Centre for Reference and Research on Influenza |
| EPI357634 | PB1 | Australia     | 2011-Sep-09 | A/PERTH/194/2011         | Pathwest QE II Medical Centre       | WHO Collaborating Centre for Reference and Research on Influenza |
| EPI370279 | PB1 | Australia     | 2011-Aug-23 | A/PERTH/175/2011         | Pathwest QE II Medical Centre       | WHO Collaborating Centre for Reference and Research on Influenza |
| EPI356494 | PB1 | Mexico        | 2011-Dec-12 | A/Mexico/3752/2011       | Laboratorio de Virus Respiratorio   | Centers for Disease Control and Prevention                       |
| EPI355226 | PB1 | Pakistan      | 2009-Dec-02 | A/Pakistan/154/2009      | National Institute of Health        | Centers for Disease Control and Prevention                       |
| EPI355215 | PB1 | Pakistan      | 2009-Nov-07 | A/Pakistan/81/2009       | National Institute of Health        | Centers for Disease Control and Prevention                       |
| EPI353904 | PB1 | Australia     | 2011-Oct-24 | A/Victoria/361/2011      | WHO Collaborating Centre for Refe   | Centers for Disease Control and Prevention                       |
| EPI353945 | PB1 | United States | 2011-Nov-04 | A/Kentucky/05/2011       | Centers for Disease Control and Pre | Centers for Disease Control and Prevention                       |
| EPI353510 | PB1 | Hong Kong     | 2009-Apr-07 | A/Hong Kong/2000/2009    | Government Virus Unit               | Centers for Disease Control and Prevention                       |
| EPI353435 | PB1 | Mexico        | 2011-Dec-12 | A/Mexico/3723/2011       | Laboratorio de Virus Respiratorio   | Centers for Disease Control and Prevention                       |

Supplementary Table 1

|           |     |               |             |                                        |                                                          |                                                                  |
|-----------|-----|---------------|-------------|----------------------------------------|----------------------------------------------------------|------------------------------------------------------------------|
| EPI353309 | PB1 | Australia     | 2007-Feb-06 | A/BRISBANE/10/2007                     | Queensland Health Scientific Service                     | WHO Collaborating Centre for Reference and Research on Influenza |
| EPI353296 | PB1 | Australia     | 2011-Feb-18 | A/BRISBANE/70/2011                     | Queensland Health Scientific Service                     | WHO Collaborating Centre for Reference and Research on Influenza |
| EPI349305 | PB1 | Australia     | 2011-Jul-19 | A/SYDNEY/74/2011                       | Westmead Hospital                                        | WHO Collaborating Centre for Reference and Research on Influenza |
| EPI349295 | PB1 | Australia     | 2011-Jul-15 | A/NEWCASTLE/179/2011                   | John Hunter Hospital, Virology Unit                      | WHO Collaborating Centre for Reference and Research on Influenza |
| EPI370284 | PB1 | Australia     | 2011-Jul-07 | A/PERTH/54/2011                        | Pathwest QE II Medical Centre                            | WHO Collaborating Centre for Reference and Research on Influenza |
| EPI349235 | PB1 | New Zealand   | 2011-Aug-01 | A/CHRISTCHURCH/18/2011                 | Canterbury Health Services                               | WHO Collaborating Centre for Reference and Research on Influenza |
| EPI349227 | PB1 | Australia     | 2011-Aug-04 | A/SYDNEY/56/2011                       | Westmead Hospital                                        | WHO Collaborating Centre for Reference and Research on Influenza |
| EPI370273 | PB1 | Cambodia      | 2011-Jul-18 | A/CAMBODIA/11/2011                     | Institute Pasteur du Cambodia                            | WHO Collaborating Centre for Reference and Research on Influenza |
| EPI349207 | PB1 | Australia     | 2011-Aug-05 | A/NEWCASTLE/170/2011                   | John Hunter Hospital, Virology Unit                      | WHO Collaborating Centre for Reference and Research on Influenza |
| EPI349184 | PB1 | Australia     | 2011-Aug-08 | A/VICTORIA/821/2011                    | Austin Health                                            | WHO Collaborating Centre for Reference and Research on Influenza |
| EPI349153 | PB1 | Australia     | 2011-Jul-06 | A/PERTH/49/2011                        | Pathwest QE II Medical Centre                            | WHO Collaborating Centre for Reference and Research on Influenza |
| EPI349129 | PB1 | Australia     | 2011-Jun-14 | A/BRISBANE/210/2011                    | Queensland Health Scientific Service                     | WHO Collaborating Centre for Reference and Research on Influenza |
| EPI348481 | PB1 | United States | 2011-Nov-06 | A/Utah/12/2011                         | Utah Department of Health                                | Centers for Disease Control and Prevention                       |
| EPI353948 | PB1 | United States | 2011-Nov-04 | A/Kentucky/05/2011                     | Kentucky Division of Laboratory Services                 | Centers for Disease Control and Prevention                       |
| EPI347308 | PB1 | China         | 2011-Dec-28 | A/Guangdong-Shenzhen/1/2011(H5N1)      | WHO Chinese National Influenza Center                    | WHO Chinese National Influenza Center                            |
| EPI464920 | PB1 | Italy         | 2010-Jan-12 | A/guinea fowl/Italy/10VIR-218-134/2010 | Istituto Zooprofilattico Sperimentale                    | Istituto Zooprofilattico Sperimentale Delle Venezie              |
| EPI450829 | PB1 | China         | 2013-Apr-04 | A/quail/Hangzhou/35/2013               | Hangzhou Center for Disease Control and Prevention       | Hangzhou Center for Disease Control and Prevention               |
| EPI448277 | PB1 | Bangladesh    | 2012-Feb-20 | A/duck/Bangladesh/32077/2012           | Institute of Epidemiology Disease Control and Prevention | Centers for Disease Control and Prevention                       |
| EPI448269 | PB1 | Bangladesh    | 2012-Jan-08 | A/chicken/Bangladesh/42010/2012        | Institute of Epidemiology Disease Control and Prevention | Centers for Disease Control and Prevention                       |
| EPI448229 | PB1 | Bangladesh    | 2011-Jun-15 | A/chicken/Bangladesh/11RS-1984-30/2011 |                                                          | Centers for Disease Control and Prevention                       |
| EPI448221 | PB1 | Bangladesh    | 2011-Jul-24 | A/duck/Bangladesh/4124T/2011           | Institute of Epidemiology Disease Control and Prevention | Centers for Disease Control and Prevention                       |
| EPI448213 | PB1 | Bangladesh    | 2011-Jul-24 | A/duck/Bangladesh/4120T/2011           | Institute of Epidemiology Disease Control and Prevention | Centers for Disease Control and Prevention                       |
| EPI448205 | PB1 | Bangladesh    | 2011-Jul-15 | A/chicken/Bangladesh/4070T/2011        | Institute of Epidemiology Disease Control and Prevention | Centers for Disease Control and Prevention                       |
| EPI448197 | PB1 | Bangladesh    | 2011-Jul-14 | A/chicken/Bangladesh/4058/2011         | Institute of Epidemiology Disease Control and Prevention | Centers for Disease Control and Prevention                       |
| EPI448189 | PB1 | Bangladesh    | 2011-Jul-01 | A/goose/Bangladesh/4051T/2011          | Institute of Epidemiology Disease Control and Prevention | Centers for Disease Control and Prevention                       |
| EPI448181 | PB1 | Bangladesh    | 2011-May-24 | A/chicken/Bangladesh/3075/2011         | Institute of Epidemiology Disease Control and Prevention | Centers for Disease Control and Prevention                       |
| EPI448165 | PB1 | Bangladesh    | 2011-Feb-07 | A/crow/Bangladesh/316T/2011            | Institute of Epidemiology Disease Control and Prevention | Centers for Disease Control and Prevention                       |
| EPI448157 | PB1 | Bangladesh    | 2011-Feb-07 | A/crow/Bangladesh/313T/2011            | Institute of Epidemiology Disease Control and Prevention | Centers for Disease Control and Prevention                       |
| EPI448149 | PB1 | Bangladesh    | 2011-Feb-13 | A/crow/Bangladesh/1056/2011            | Institute of Epidemiology Disease Control and Prevention | Centers for Disease Control and Prevention                       |
| EPI448141 | PB1 | Bangladesh    | 2011-Feb-04 | A/chicken/Bangladesh/11303/2011        | Institute of Epidemiology Disease Control and Prevention | Centers for Disease Control and Prevention                       |
| EPI448133 | PB1 | Bangladesh    | 2011-Feb-07 | A/poultry/Bangladesh/11255-C/2011      | Institute of Epidemiology Disease Control and Prevention | Centers for Disease Control and Prevention                       |
| EPI448109 | PB1 | Bangladesh    | 2011-Jun-29 | A/waterfowl/Bangladesh/33025/2011      | Institute of Epidemiology Disease Control and Prevention | Centers for Disease Control and Prevention                       |
| EPI448101 | PB1 | Bangladesh    | 2011-Mar-20 | A/duck/Bangladesh/1849/2011            | Institute of Epidemiology Disease Control and Prevention | Centers for Disease Control and Prevention                       |
| EPI448061 | PB1 | Bangladesh    | 2011-Feb-15 | A/crow/Bangladesh/1061/2011            | Institute of Epidemiology Disease Control and Prevention | Centers for Disease Control and Prevention                       |

Supplementary Table 1

|           |     |            |             |                                  |                                     |                                            |
|-----------|-----|------------|-------------|----------------------------------|-------------------------------------|--------------------------------------------|
| EPI448053 | PB1 | Bangladesh | 2011-Feb-13 | A/crow/Bangladesh/1054/2011      | Institute of Epidemiology Disease C | Centers for Disease Control and Prevention |
| EPI448045 | PB1 | Bangladesh | 2011-Jan-20 | A/crow/Bangladesh/1020/2011      | Institute of Epidemiology Disease C | Centers for Disease Control and Prevention |
| EPI448037 | PB1 | Bangladesh | 2011-Jan-20 | A/crow/Bangladesh/1019/2011      | Institute of Epidemiology Disease C | Centers for Disease Control and Prevention |
| EPI448029 | PB1 | Bangladesh | 2011-Jan-20 | A/crow/Bangladesh/1008/2011      | Institute of Epidemiology Disease C | Centers for Disease Control and Prevention |
| EPI425953 | PB1 | Vietnam    | 2011-Sep-07 | A/chicken/Vietnam/NCVD-1038/2011 | National Centre of Veterinary Diagn | Centers for Disease Control and Prevention |
| EPI425945 | PB1 | Vietnam    | 2011-Feb-28 | A/chicken/Vietnam/NCVD-715/2011  | National Centre of Veterinary Diagn | Centers for Disease Control and Prevention |
| EPI425937 | PB1 | Vietnam    | 2012-Aug-22 | A/duck/Vietnam/NCVD-1875/2012    | National Centre of Veterinary Diagn | Centers for Disease Control and Prevention |
| EPI425929 | PB1 | Vietnam    | 2012-Jul-12 | A/duck/Vietnam/NCVD-1544/2012    | National Centre of Veterinary Diagn | Centers for Disease Control and Prevention |
| EPI425913 | PB1 | Vietnam    | 2012-Feb-24 | A/duck/Vietnam/NCVD-1304/2012    | National Centre of Veterinary Diagn | Centers for Disease Control and Prevention |
| EPI425905 | PB1 | Vietnam    | 2012-Feb-17 | A/chicken/Vietnam/NCVD-1254/2011 | National Centre of Veterinary Diagn | Centers for Disease Control and Prevention |
| EPI425897 | PB1 | Vietnam    | 2012-Feb-16 | A/duck/Vietnam/NCVD-1251/2011    | National Centre of Veterinary Diagn | Centers for Disease Control and Prevention |
| EPI425889 | PB1 | Vietnam    | 2012-Feb-08 | A/duck/Vietnam/NCVD-1212/2012    | National Centre of Veterinary Diagn | Centers for Disease Control and Prevention |
| EPI425873 | PB1 | Vietnam    | 2012-Jan-01 | A/duck/Vietnam/NCVD-1163/2011    | National Centre of Veterinary Diagn | Centers for Disease Control and Prevention |
| EPI425865 | PB1 | Vietnam    | 2011-Dec-30 | A/duck/Vietnam/NCVD-1162/2011    | National Centre of Veterinary Diagn | Centers for Disease Control and Prevention |
| EPI425857 | PB1 | Vietnam    | 2011-Dec-30 | A/duck/Vietnam/NCVD-1161/2011    | National Centre of Veterinary Diagn | Centers for Disease Control and Prevention |
| EPI425833 | PB1 | Vietnam    | 2011-Oct-31 | A/chicken/Vietnam/NCVD-1148/2011 | National Centre of Veterinary Diagn | Centers for Disease Control and Prevention |
| EPI425817 | PB1 | Vietnam    | 2011-Sep-08 | A/muscovy duck/Vietnam/NCVD-1049 | National Centre of Veterinary Diagn | Centers for Disease Control and Prevention |
| EPI425793 | PB1 | Vietnam    | 2011-Sep-07 | A/duck/Vietnam/NCVD-1042/2011    | National Centre of Veterinary Diagn | Centers for Disease Control and Prevention |
| EPI425785 | PB1 | Vietnam    | 2011-Sep-07 | A/chicken/Vietnam/NCVD-1040/2011 | National Centre of Veterinary Diagn | Centers for Disease Control and Prevention |
| EPI425769 | PB1 | Vietnam    | 2011-Jan-01 | A/duck/Vietnam/NCVD-671/2011     | National Centre of Veterinary Diagn | Centers for Disease Control and Prevention |
| EPI425686 | PB1 | Vietnam    | 2012-Jul-31 | A/duck/Vietnam/NCVD-1602/2012    | National Centre of Veterinary Diagn | Centers for Disease Control and Prevention |
| EPI425678 | PB1 | Vietnam    | 2012-Jul-15 | A/duck/Vietnam/NCVD-1593/2012    | National Centre of Veterinary Diagn | Centers for Disease Control and Prevention |
| EPI425670 | PB1 | Vietnam    | 2012-Aug-30 | A/duck/Vietnam/NCVD-1905/2012    | National Centre of Veterinary Diagn | Centers for Disease Control and Prevention |
| EPI425654 | PB1 | Vietnam    | 2012-Sep-21 | A/duck/Vietnam/NCVD-1968/2012    | National Centre of Veterinary Diagn | Centers for Disease Control and Prevention |
| EPI425646 | PB1 | Vietnam    | 2012-Aug-24 | A/duck/Vietnam/NCVD-1936/2012    | National Centre of Veterinary Diagn | Centers for Disease Control and Prevention |
| EPI425638 | PB1 | Vietnam    | 2012-Aug-19 | A/duck/Vietnam/NCVD-1931/2012    | National Centre of Veterinary Diagn | Centers for Disease Control and Prevention |
| EPI425630 | PB1 | Vietnam    | 2012-Aug-16 | A/duck/Vietnam/NCVD-1928/2012    | National Centre of Veterinary Diagn | Centers for Disease Control and Prevention |
| EPI425622 | PB1 | Vietnam    | 2012-Aug-18 | A/duck/Vietnam/NCVD-1930/2012    | National Centre of Veterinary Diagn | Centers for Disease Control and Prevention |
| EPI425614 | PB1 | Vietnam    | 2012-Mar-02 | A/chicken/Vietnam/NCVD-1488/2012 | National Centre of Veterinary Diagn | Centers for Disease Control and Prevention |
| EPI425606 | PB1 | Vietnam    | 2012-Sep-21 | A/chicken/Vietnam/NCVD-1963/2012 | National Centre of Veterinary Diagn | Centers for Disease Control and Prevention |
| EPI425598 | PB1 | Vietnam    | 2012-Sep-21 | A/duck/Vietnam/NCVD-1463/2012    | National Centre of Veterinary Diagn | Centers for Disease Control and Prevention |
| EPI425590 | PB1 | Vietnam    | 2011-Jun-15 | A/chicken/Vietnam/NCVD-883/2011  | National Centre of Veterinary Diagn | Centers for Disease Control and Prevention |
| EPI425582 | PB1 | Vietnam    | 2011-Jun-15 | A/chicken/Vietnam/NCVD-882/2011  | National Centre of Veterinary Diagn | Centers for Disease Control and Prevention |
| EPI425566 | PB1 | Vietnam    | 2011-Mar-17 | A/chicken/Vietnam/NCVD-857/2011  | National Centre of Veterinary Diagn | Centers for Disease Control and Prevention |

Supplementary Table 1

|           |     |         |             |                                       |                                     |                                            |
|-----------|-----|---------|-------------|---------------------------------------|-------------------------------------|--------------------------------------------|
| EPI425558 | PB1 | Vietnam | 2010-Nov-01 | A/duck/Vietnam/NCVD-645/2010          | National Centre of Veterinary Diagr | Centers for Disease Control and Prevention |
| EPI425550 | PB1 | Vietnam | 2011-Mar-12 | A/duck/Vietnam/NCVD-850/2011          | National Centre of Veterinary Diagr | Centers for Disease Control and Prevention |
| EPI425542 | PB1 | Vietnam | 2011-Mar-03 | A/duck/Vietnam/NCVD-825/2011          | National Centre of Veterinary Diagr | Centers for Disease Control and Prevention |
| EPI425534 | PB1 | Vietnam | 2010-Nov-06 | A/duck/Vietnam/NCVD-815/2010          | National Centre of Veterinary Diagr | Centers for Disease Control and Prevention |
| EPI425518 | PB1 | Vietnam | 2011-Jun-15 | A/chicken/Vietnam/NCVD-780/2011       | National Centre of Veterinary Diagr | Centers for Disease Control and Prevention |
| EPI425494 | PB1 | Vietnam | 2011-Aug-04 | A/duck/Vietnam/NCVD-931/2011          | National Centre of Veterinary Diagr | Centers for Disease Control and Prevention |
| EPI425486 | PB1 | Vietnam | 2011-Jul-19 | A/duck/Vietnam/NCVD-927/2011          | National Centre of Veterinary Diagr | Centers for Disease Control and Prevention |
| EPI425478 | PB1 | Vietnam | 2011-Feb-25 | A/chicken/Vietnam/NCVD-775/2011       | National Centre of Veterinary Diagr | Centers for Disease Control and Prevention |
| EPI425470 | PB1 | Vietnam | 2012-Feb-16 | A/chicken/Vietnam/NCVD-1247/2012      | National Centre of Veterinary Diagr | Centers for Disease Control and Prevention |
| EPI425454 | PB1 | Vietnam | 2012-Feb-20 | A/duck/Vietnam/NCVD-1276/2012         | National Centre of Veterinary Diagr | Centers for Disease Control and Prevention |
| EPI425446 | PB1 | Vietnam | 2012-Feb-08 | A/duck/Vietnam/NCVD-1219/2012         | National Centre of Veterinary Diagr | Centers for Disease Control and Prevention |
| EPI425438 | PB1 | Vietnam | 2012-Feb-08 | A/duck/Vietnam/NCVD-1210/2012         | National Centre of Veterinary Diagr | Centers for Disease Control and Prevention |
| EPI425430 | PB1 | Vietnam | 2012-Feb-08 | A/duck/Vietnam/NCVD-1207/2012         | National Centre of Veterinary Diagr | Centers for Disease Control and Prevention |
| EPI425422 | PB1 | Vietnam | 2012-Feb-24 | A/duck/Vietnam/NCVD-1312/2012         | National Centre of Veterinary Diagr | Centers for Disease Control and Prevention |
| EPI425414 | PB1 | Vietnam | 2012-Feb-24 | A/duck/Vietnam/NCVD-1306/2012         | National Centre of Veterinary Diagr | Centers for Disease Control and Prevention |
| EPI425406 | PB1 | Vietnam | 2012-Feb-21 | A/duck/Vietnam/NCVD-1269/2012         | National Centre of Veterinary Diagr | Centers for Disease Control and Prevention |
| EPI425390 | PB1 | Vietnam | 2012-Feb-16 | A/duck/Vietnam/NCVD-1253/2012         | National Centre of Veterinary Diagr | Centers for Disease Control and Prevention |
| EPI425382 | PB1 | Vietnam | 2012-Feb-16 | A/chicken/Vietnam/NCVD-1248/2012      | National Centre of Veterinary Diagr | Centers for Disease Control and Prevention |
| EPI425374 | PB1 | Vietnam | 2012-Feb-17 | A/duck/Vietnam/NCVD-1234/2012         | National Centre of Veterinary Diagr | Centers for Disease Control and Prevention |
| EPI425366 | PB1 | Vietnam | 2012-Feb-17 | A/duck/Vietnam/NCVD-1232/2012         | National Centre of Veterinary Diagr | Centers for Disease Control and Prevention |
| EPI425358 | PB1 | Vietnam | 2012-Jan-06 | A/chicken/Vietnam/NCVD-1225/2012      | National Centre of Veterinary Diagr | Centers for Disease Control and Prevention |
| EPI425342 | PB1 | Vietnam | 2011-Apr-04 | A/chicken/Vietnam/NCVD-753/2011       | National Centre of Veterinary Diagr | Centers for Disease Control and Prevention |
| EPI425334 | PB1 | Vietnam | 2012-Feb-08 | A/duck/Vietnam/NCVD-1221/2012         | National Centre of Veterinary Diagr | Centers for Disease Control and Prevention |
| EPI425326 | PB1 | Vietnam | 2012-Feb-08 | A/muscovy duck/Vietnam/NCVD-1220/2012 | National Centre of Veterinary Diagr | Centers for Disease Control and Prevention |
| EPI425318 | PB1 | Vietnam | 2012-Feb-08 | A/duck/Vietnam/NCVD-1217/2012         | National Centre of Veterinary Diagr | Centers for Disease Control and Prevention |
| EPI425310 | PB1 | Vietnam | 2012-Aug-30 | A/duck/Vietnam/NCVD-1904/2012         | National Centre of Veterinary Diagr | Centers for Disease Control and Prevention |
| EPI425302 | PB1 | Vietnam | 2012-Aug-28 | A/duck/Vietnam/NCVD-1902/2012         | National Centre of Veterinary Diagr | Centers for Disease Control and Prevention |
| EPI425294 | PB1 | Vietnam | 2011-Jan-01 | A/duck/Vietnam/NCVD-669/2011          | National Centre of Veterinary Diagr | Centers for Disease Control and Prevention |
| EPI425278 | PB1 | Vietnam | 2011-Jan-01 | A/duck/Vietnam/NCVD-673/2011          | National Centre of Veterinary Diagr | Centers for Disease Control and Prevention |
| EPI425270 | PB1 | Vietnam | 2012-Aug-27 | A/duck/Vietnam/NCVD-1901/2012         | National Centre of Veterinary Diagr | Centers for Disease Control and Prevention |
| EPI425262 | PB1 | Vietnam | 2012-Jan-06 | A/chicken/Vietnam/NCVD-1224/2012      | National Centre of Veterinary Diagr | Centers for Disease Control and Prevention |
| EPI425246 | PB1 | Vietnam | 2012-Jan-30 | A/chicken/Vietnam/NCVD-1177/2012      | National Centre of Veterinary Diagr | Centers for Disease Control and Prevention |
| EPI425238 | PB1 | Vietnam | 2012-Jan-13 | A/duck/Vietnam/NCVD-1171/2012         | National Centre of Veterinary Diagr | Centers for Disease Control and Prevention |
| EPI425230 | PB1 | Vietnam | 2011-Dec-30 | A/duck/Vietnam/NCVD-1160/2011         | National Centre of Veterinary Diagr | Centers for Disease Control and Prevention |

Supplementary Table 1

|           |     |         |             |                                  |                                     |                                            |
|-----------|-----|---------|-------------|----------------------------------|-------------------------------------|--------------------------------------------|
| EPI425222 | PB1 | Vietnam | 2011-Nov-26 | A/duck/Vietnam/NCVD1-48/2011     | National Centre of Veterinary Diagn | Centers for Disease Control and Prevention |
| EPI425214 | PB1 | Vietnam | 2011-Nov-26 | A/duck/Vietnam/NCVD1-37/2011     | National Centre of Veterinary Diagn | Centers for Disease Control and Prevention |
| EPI425182 | PB1 | Vietnam | 2012-Sep-09 | A/duck/Vietnam/NCVD-1944/2012    | National Centre of Veterinary Diagn | Centers for Disease Control and Prevention |
| EPI425174 | PB1 | Vietnam | 2012-Sep-01 | A/chicken/Vietnam/NCVD-1942/2012 | National Centre of Veterinary Diagn | Centers for Disease Control and Prevention |
| EPI425158 | PB1 | Vietnam | 2012-Aug-25 | A/duck/Vietnam/NCVD-1937/2012    | National Centre of Veterinary Diagn | Centers for Disease Control and Prevention |
| EPI425150 | PB1 | Vietnam | 2012-Aug-23 | A/duck/Vietnam/NCVD-1935/2012    | National Centre of Veterinary Diagn | Centers for Disease Control and Prevention |
| EPI425142 | PB1 | Vietnam | 2012-Aug-21 | A/duck/Vietnam/NCVD-1933/2012    | National Centre of Veterinary Diagn | Centers for Disease Control and Prevention |
| EPI425134 | PB1 | Vietnam | 2012-Aug-28 | A/duck/Vietnam/NCVD-1899/2012    | National Centre of Veterinary Diagn | Centers for Disease Control and Prevention |
| EPI425126 | PB1 | Vietnam | 2012-Aug-21 | A/duck/Vietnam/NCVD-1872/2012    | National Centre of Veterinary Diagn | Centers for Disease Control and Prevention |
| EPI425118 | PB1 | Vietnam | 2012-Feb-20 | A/duck/Vietnam/NCVD-1279/2012    | National Centre of Veterinary Diagn | Centers for Disease Control and Prevention |
| EPI425102 | PB1 | Vietnam | 2012-Jun-12 | A/duck/Vietnam/NCVD-1497/2012    | National Centre of Veterinary Diagn | Centers for Disease Control and Prevention |
| EPI425094 | PB1 | Vietnam | 2011-Apr-03 | A/duck/Vietnam/NCVD-827/2011     | National Centre of Veterinary Diagn | Centers for Disease Control and Prevention |
| EPI425086 | PB1 | Vietnam | 2011-Jun-15 | A/chicken/Vietnam/NCVD-779/2011  | National Centre of Veterinary Diagn | Centers for Disease Control and Prevention |
| EPI425078 | PB1 | Vietnam | 2011-Jun-15 | A/chicken/Vietnam/NCVD-778/2011  | National Centre of Veterinary Diagn | Centers for Disease Control and Prevention |
| EPI425070 | PB1 | Vietnam | 2011-Feb-25 | A/chicken/Vietnam/NCVD-776/2011  | National Centre of Veterinary Diagn | Centers for Disease Control and Prevention |
| EPI425022 | PB1 | Vietnam | 2012-Aug-25 | A/duck/Vietnam/NCVD-1884/2012    | National Centre of Veterinary Diagn | Centers for Disease Control and Prevention |
| EPI425014 | PB1 | Vietnam | 2012-Aug-23 | A/duck/Vietnam/NCVD-1878/2012    | National Centre of Veterinary Diagn | Centers for Disease Control and Prevention |
| EPI425006 | PB1 | Vietnam | 2012-May-04 | A/chicken/Vietnam/NCVD-1437/2012 | National Centre of Veterinary Diagn | Centers for Disease Control and Prevention |
| EPI424998 | PB1 | Vietnam | 2011-Feb-26 | A/duck/Vietnam/NCVD-714/2011     | National Centre of Veterinary Diagn | Centers for Disease Control and Prevention |
| EPI424990 | PB1 | Vietnam | 2012-Jul-31 | A/duck/Vietnam/NCVD-1607/2012    | National Centre of Veterinary Diagn | Centers for Disease Control and Prevention |
| EPI424982 | PB1 | Vietnam | 2012-Jul-27 | A/duck/Vietnam/NCVD-1584/2012    | National Centre of Veterinary Diagn | Centers for Disease Control and Prevention |
| EPI424974 | PB1 | Vietnam | 2011-Jun-15 | A/chicken/Vietnam/NCVD-710/2011  | National Centre of Veterinary Diagn | Centers for Disease Control and Prevention |
| EPI424966 | PB1 | Vietnam | 2011-Jun-15 | A/chicken/Vietnam/NCVD-709/2011  | National Centre of Veterinary Diagn | Centers for Disease Control and Prevention |
| EPI424958 | PB1 | Vietnam | 1905-Jul-02 | A/duck/Vietnam/NCVD-891/2010     | National Centre of Veterinary Diagn | Centers for Disease Control and Prevention |
| EPI424950 | PB1 | Vietnam | 1905-Jul-02 | A/duck/Vietnam/NCVD-890/2010     | National Centre of Veterinary Diagn | Centers for Disease Control and Prevention |
| EPI424942 | PB1 | Vietnam | 1905-Jul-02 | A/duck/Vietnam/NCVD-885/2010     | National Centre of Veterinary Diagn | Centers for Disease Control and Prevention |
| EPI424926 | PB1 | Vietnam | 2011-Apr-06 | A/duck/Vietnam/NCVD-947/2011     | National Centre of Veterinary Diagn | Centers for Disease Control and Prevention |
| EPI424918 | PB1 | Vietnam | 2011-Mar-18 | A/duck/Vietnam/NCVD-945/2011     | National Centre of Veterinary Diagn | Centers for Disease Control and Prevention |
| EPI424910 | PB1 | Vietnam | 2011-Feb-12 | A/duck/Vietnam/NCVD-943/2011     | National Centre of Veterinary Diagn | Centers for Disease Control and Prevention |
| EPI424902 | PB1 | Vietnam | 2011-Aug-04 | A/duck/Vietnam/NCVD-935/2011     | National Centre of Veterinary Diagn | Centers for Disease Control and Prevention |
| EPI424878 | PB1 | Vietnam | 2011-Sep-06 | A/duck/Vietnam/NCVD-1029/2011    | National Centre of Veterinary Diagn | Centers for Disease Control and Prevention |
| EPI424862 | PB1 | Vietnam | 2011-Sep-06 | A/duck/Vietnam/NCVD-1025/2011    | National Centre of Veterinary Diagn | Centers for Disease Control and Prevention |
| EPI424854 | PB1 | Vietnam | 2011-Sep-06 | A/duck/Vietnam/NCVD-1022/2011    | National Centre of Veterinary Diagn | Centers for Disease Control and Prevention |
| EPI424846 | PB1 | Vietnam | 2011-Sep-06 | A/duck/Vietnam/NCVD-1018/2011    | National Centre of Veterinary Diagn | Centers for Disease Control and Prevention |

Supplementary Table 1

|           |     |         |             |                                  |                                     |                                            |
|-----------|-----|---------|-------------|----------------------------------|-------------------------------------|--------------------------------------------|
| EPI424838 | PB1 | Vietnam | 2011-Jun-24 | A/duck/Vietnam/NCVD-952/2011     | National Centre of Veterinary Diagr | Centers for Disease Control and Prevention |
| EPI424830 | PB1 | Vietnam | 2011-Jun-15 | A/duck/Vietnam/NCVD-711/2011     | National Centre of Veterinary Diagr | Centers for Disease Control and Prevention |
| EPI424814 | PB1 | Vietnam | 2011-Feb-26 | A/duck/Vietnam/NCVD-712/2011     | National Centre of Veterinary Diagr | Centers for Disease Control and Prevention |
| EPI424806 | PB1 | Vietnam | 2011-Jun-15 | A/chicken/Vietnam/NCVD-881/2011  | National Centre of Veterinary Diagr | Centers for Disease Control and Prevention |
| EPI424798 | PB1 | Vietnam | 2011-Jun-15 | A/chicken/Vietnam/NCVD-880/2011  | National Centre of Veterinary Diagr | Centers for Disease Control and Prevention |
| EPI424790 | PB1 | Vietnam | 2011-Jun-15 | A/chicken/Vietnam/NCVD-876/2011  | National Centre of Veterinary Diagr | Centers for Disease Control and Prevention |
| EPI424782 | PB1 | Vietnam | 2011-Apr-07 | A/duck/Vietnam/NCVD-861/2011     | National Centre of Veterinary Diagr | Centers for Disease Control and Prevention |
| EPI424774 | PB1 | Vietnam | 2011-Apr-07 | A/duck/Vietnam/NCVD-859/2011     | National Centre of Veterinary Diagr | Centers for Disease Control and Prevention |
| EPI424750 | PB1 | Vietnam | 2010-Oct-29 | A/duck/Vietnam/NCVD-784/2010     | National Centre of Veterinary Diagr | Centers for Disease Control and Prevention |
| EPI424742 | PB1 | Vietnam | 2012-Aug-20 | A/duck/Vietnam/NCVD-1932/2012    | National Centre of Veterinary Diagr | Centers for Disease Control and Prevention |
| EPI424734 | PB1 | Vietnam | 2012-Aug-15 | A/chicken/Vietnam/NCVD-1927/2012 | National Centre of Veterinary Diagr | Centers for Disease Control and Prevention |
| EPI424726 | PB1 | Vietnam | 2012-Aug-27 | A/duck/Vietnam/NCVD-1898/2012    | National Centre of Veterinary Diagr | Centers for Disease Control and Prevention |
| EPI424710 | PB1 | Vietnam | 2012-Aug-23 | A/duck/Vietnam/NCVD-1896/2012    | National Centre of Veterinary Diagr | Centers for Disease Control and Prevention |
| EPI424702 | PB1 | Vietnam | 2012-Aug-20 | A/duck/Vietnam/NCVD-1869/2012    | National Centre of Veterinary Diagr | Centers for Disease Control and Prevention |
| EPI424694 | PB1 | Vietnam | 2011-Apr-06 | A/duck/Vietnam/NCVD-948/2011     | National Centre of Veterinary Diagr | Centers for Disease Control and Prevention |
| EPI424686 | PB1 | Vietnam | 2012-Sep-21 | A/duck/Vietnam/NCVD-1974/2012    | National Centre of Veterinary Diagr | Centers for Disease Control and Prevention |
| EPI424678 | PB1 | Vietnam | 2012-Jun-11 | A/duck/Vietnam/NCVD-1494/2012    | National Centre of Veterinary Diagr | Centers for Disease Control and Prevention |
| EPI424670 | PB1 | Vietnam | 2012-Aug-29 | A/duck/Vietnam/NCVD-1940/2012    | National Centre of Veterinary Diagr | Centers for Disease Control and Prevention |
| EPI424432 | PB1 | Vietnam | 2011-Feb-01 | A/chicken/Vietnam/NCVD-705/2011  | National Centre of Veterinary Diagr | Centers for Disease Control and Prevention |
| EPI424416 | PB1 | Vietnam | 2011-Feb-01 | A/chicken/Vietnam/NCVD-703/2011  | National Centre of Veterinary Diagr | Centers for Disease Control and Prevention |
| EPI424408 | PB1 | Vietnam | 2011-Feb-01 | A/chicken/Vietnam/NCVD-702/2011  | National Centre of Veterinary Diagr | Centers for Disease Control and Prevention |
| EPI424400 | PB1 | Vietnam | 2011-Feb-01 | A/chicken/Vietnam/NCVD-699/2011  | National Centre of Veterinary Diagr | Centers for Disease Control and Prevention |
| EPI424392 | PB1 | Vietnam | 2012-Feb-26 | A/duck/Vietnam/NCVD-1283/2012    | National Centre of Veterinary Diagr | Centers for Disease Control and Prevention |
| EPI424368 | PB1 | Vietnam | 2010-Dec-01 | A/duck/Vietnam/NCVD-664/2010     | National Centre of Veterinary Diagr | Centers for Disease Control and Prevention |
| EPI424360 | PB1 | Vietnam | 2012-Feb-08 | A/duck/Vietnam/NCVD-1206/2012    | National Centre of Veterinary Diagr | Centers for Disease Control and Prevention |
| EPI424352 | PB1 | Vietnam | 2011-Jun-15 | A/chicken/Vietnam/NCVD-878/2011  | National Centre of Veterinary Diagr | Centers for Disease Control and Prevention |
| EPI427327 | PB1 | Vietnam | 2011-Jan-01 | A/chicken/Vietnam/NCVD-675/2011  | National Centre of Veterinary Diagr | Centers for Disease Control and Prevention |
| EPI373008 | PB1 | Egypt   | 2007-Jan-01 | A/chicken/Egypt/9403-NAMRU3/200  | U.S. Naval Medical Research Unit N  | Centers for Disease Control and Prevention |
| EPI373001 | PB1 | Egypt   | 2007-Jan-01 | A/chicken/Egypt/9402-NAMRU3/200  | U.S. Naval Medical Research Unit N  | Centers for Disease Control and Prevention |
| EPI372518 | PB1 | Ukraine | 2006-Aug-13 | A/garganey/Ukraine/05839-NAMRU3  | U.S. Naval Medical Research Unit N  | Centers for Disease Control and Prevention |
| EPI372510 | PB1 | Ukraine | 2006-Aug-13 | A/garganey/Ukraine/05835-NAMRU3  | U.S. Naval Medical Research Unit N  | Centers for Disease Control and Prevention |
| EPI372502 | PB1 | Ukraine | 2006-Sep-30 | A/mallard/Ukraine/05842-NAMRU3/2 | U.S. Naval Medical Research Unit N  | Centers for Disease Control and Prevention |
| EPI372487 | PB1 | Ukraine | 2006-Aug-13 | A/garganey/Ukraine/05834-NAMRU3  | U.S. Naval Medical Research Unit N  | Centers for Disease Control and Prevention |
| EPI372479 | PB1 | Egypt   | 2005-Nov-21 | A/teal/Egypt/12908-NAMRU3/2005   | U.S. Naval Medical Research Unit N  | Centers for Disease Control and Prevention |



Supplementary Table 1

|           |     |            |             |                                          |                                     |                                            |
|-----------|-----|------------|-------------|------------------------------------------|-------------------------------------|--------------------------------------------|
| EPI372472 | PB1 | Ukraine    | 2005-Sep-17 | A/teal/Ukraine/12177-NAMRU3/2005         | U.S. Naval Medical Research Unit N  | Centers for Disease Control and Prevention |
| EPI372464 | PB1 | Egypt      | 2007-Jan-26 | A/teal/Egypt/01351-NAMRU3/2007           | U.S. Naval Medical Research Unit N  | Centers for Disease Control and Prevention |
| EPI372448 | PB1 | Egypt      | 2006-Dec-29 | A/shoveler/Egypt/00017-NAMRU3/2006       | U.S. Naval Medical Research Unit N  | Centers for Disease Control and Prevention |
| EPI372440 | PB1 | Egypt      | 2006-Dec-29 | A/shoveler/Egypt/00006-NAMRU3/2006       | U.S. Naval Medical Research Unit N  | Centers for Disease Control and Prevention |
| EPI372432 | PB1 | Egypt      | 2006-Dec-29 | A/shoveler/Egypt/00004-NAMRU3/2006       | U.S. Naval Medical Research Unit N  | Centers for Disease Control and Prevention |
| EPI372424 | PB1 | Egypt      | 2007-Jan-19 | A/teal/Egypt/01207-NAMRU3/2007           | U.S. Naval Medical Research Unit N  | Centers for Disease Control and Prevention |
| EPI372408 | PB1 | Egypt      | 2007-Jan-05 | A/shoveler/Egypt/00215-NAMRU3/2007       | U.S. Naval Medical Research Unit N  | Centers for Disease Control and Prevention |
| EPI372400 | PB1 | Egypt      | 2007-Jan-19 | A/shoveler/Egypt/01198-NAMRU3/2007       | U.S. Naval Medical Research Unit N  | Centers for Disease Control and Prevention |
| EPI372392 | PB1 | Egypt      | 2006-Apr-07 | A/Egyptian goose/Egypt/05588-NAMRU3/2006 | U.S. Naval Medical Research Unit N  | Centers for Disease Control and Prevention |
| EPI372384 | PB1 | Egypt      | 2006-Dec-02 | A/teal/Egypt/13203-NAMRU3/2006           | U.S. Naval Medical Research Unit N  | Centers for Disease Control and Prevention |
| EPI372376 | PB1 | Egypt      | 2006-Dec-08 | A/shoveler/Egypt/14029-NAMRU3/2006       | U.S. Naval Medical Research Unit N  | Centers for Disease Control and Prevention |
| EPI372369 | PB1 | Egypt      | 2006-Dec-02 | A/shoveler/Egypt/13251-NAMRU3/2006       | U.S. Naval Medical Research Unit N  | Centers for Disease Control and Prevention |
| EPI372361 | PB1 | Egypt      | 2006-Dec-22 | A/shoveler/Egypt/14879-NAMRU3/2006       | U.S. Naval Medical Research Unit N  | Centers for Disease Control and Prevention |
| EPI372353 | PB1 | Egypt      | 2005-Oct-03 | A/teal/Egypt/09888-NAMRU3/2005           | U.S. Naval Medical Research Unit N  | Centers for Disease Control and Prevention |
| EPI372329 | PB1 | Egypt      | 2005-Jan-13 | A/shoveler/Egypt/00134-NAMRU3/2005       | U.S. Naval Medical Research Unit N  | Centers for Disease Control and Prevention |
| EPI372313 | PB1 | Egypt      | 2004-Dec-18 | A/shoveler/Egypt/09782-NAMRU3/2004       | U.S. Naval Medical Research Unit N  | Centers for Disease Control and Prevention |
| EPI372305 | PB1 | Egypt      | 2004-Feb-18 | A/teal/Egypt/00835-NAMRU3/2004           | U.S. Naval Medical Research Unit N  | Centers for Disease Control and Prevention |
| EPI372297 | PB1 | Egypt      | 2004-Jan-28 | A/teal/Egypt/00688-NAMRU3/2004           | U.S. Naval Medical Research Unit N  | Centers for Disease Control and Prevention |
| EPI372289 | PB1 | Egypt      | 2004-Jan-27 | A/shoveler/Egypt/00600-NAMRU3/2004       | U.S. Naval Medical Research Unit N  | Centers for Disease Control and Prevention |
| EPI372281 | PB1 | Egypt      | 2004-Jan-27 | A/shoveler/Egypt/00597-NAMRU3/2004       | U.S. Naval Medical Research Unit N  | Centers for Disease Control and Prevention |
| EPI448891 | PB1 | Bangladesh | 2011-Jul-17 | A/waterfowl/Bangladesh/31935/2011        | Institute of Epidemiology Disease C | Centers for Disease Control and Prevention |
| EPI448898 | PB1 | Bangladesh | 2011-Feb-19 | A/chicken/Bangladesh/3012/2011           | Institute of Epidemiology Disease C | Centers for Disease Control and Prevention |
| EPI448912 | PB1 | Bangladesh | 2011-Jul-14 | A/duck/Bangladesh/4059T/2011             | Institute of Epidemiology Disease C | Centers for Disease Control and Prevention |
| EPI348851 | PB1 | Vietnam    | 2010-Jun-30 | A/duck/Vietnam/NCVD-433/2010             | National Institute of Hygiene and E | Centers for Disease Control and Prevention |
| EPI348914 | PB1 | Vietnam    | 2010-Mar-29 | A/duck/Vietnam/NCVD-472/2010             | National Institute of Hygiene and E | Centers for Disease Control and Prevention |
| EPI348907 | PB1 | Vietnam    | 2010-Mar-29 | A/duck/Vietnam/NCVD-471/2010             | National Institute of Hygiene and E | Centers for Disease Control and Prevention |
| EPI348900 | PB1 | Vietnam    | 2010-Oct-15 | A/duck/Vietnam/NCVD-462/2010             | National Institute of Hygiene and E | Centers for Disease Control and Prevention |
| EPI348893 | PB1 | Vietnam    | 2010-Nov-22 | A/duck/Vietnam/NCVD-461/2010             | National Institute of Hygiene and E | Centers for Disease Control and Prevention |
| EPI348886 | PB1 | Vietnam    | 2010-Nov-22 | A/duck/Vietnam/NCVD-460/2010             | National Institute of Hygiene and E | Centers for Disease Control and Prevention |
| EPI348879 | PB1 | Vietnam    | 2010-Nov-22 | A/chicken/Vietnam/NCVD-459/2010          | National Institute of Hygiene and E | Centers for Disease Control and Prevention |
| EPI348872 | PB1 | Vietnam    | 2010-Nov-16 | A/duck/Vietnam/NCVD-457/2010             | National Institute of Hygiene and E | Centers for Disease Control and Prevention |
| EPI348865 | PB1 | Vietnam    | 2010-Nov-16 | A/duck/Vietnam/NCVD-456/2010             | National Institute of Hygiene and E | Centers for Disease Control and Prevention |
| EPI348858 | PB1 | Vietnam    | 2010-Oct-04 | A/duck/Vietnam/NCVD-449/2010             | National Institute of Hygiene and E | Centers for Disease Control and Prevention |
| EPI348844 | PB1 | Vietnam    | 2010-Jul-14 | A/duck/Vietnam/NCVD-432/2010             | National Institute of Hygiene and E | Centers for Disease Control and Prevention |

Supplementary Table 1

|           |     |         |             |                                   |                                     |                                                     |
|-----------|-----|---------|-------------|-----------------------------------|-------------------------------------|-----------------------------------------------------|
| EPI348837 | PB1 | Vietnam | 2010-Mar-04 | A/duck/Vietnam/NCVD-430/2010      | National Institute of Hygiene and E | Centers for Disease Control and Prevention          |
| EPI348830 | PB1 | Vietnam | 2010-Feb-25 | A/chicken/Vietnam/NCVD-429/2010   | National Institute of Hygiene and E | Centers for Disease Control and Prevention          |
| EPI348809 | PB1 | Vietnam | 2009-Oct-11 | A/muscovy duck/Vietnam/NCVD-426/  | National Institute of Hygiene and E | Centers for Disease Control and Prevention          |
| EPI348802 | PB1 | Vietnam | 2009-Feb-20 | A/chicken/Vietnam/NCVD-425/2009   | National Institute of Hygiene and E | Centers for Disease Control and Prevention          |
| EPI348795 | PB1 | Vietnam | 2009-Feb-17 | A/chicken/Vietnam/NCVD-424/2009   | National Institute of Hygiene and E | Centers for Disease Control and Prevention          |
| EPI484293 | PB1 | Italy   | 2013-Aug-13 | A/chicken/Italy/13VIR4527-11/2013 | Istituto Zooprofilattico Sperimenta | Istituto Zooprofilattico Sperimentale Delle Venezie |
| EPI466532 | PB1 | China   | 2012-Dec-23 | A/chicken/Jiangsu/YCDF/2012       | Yangzhou University                 | Chinese Academy of Sciences                         |
| EPI466528 | PB1 | China   | 2012-Dec-28 | A/chicken/Jiangsu/NTHA1/2012      | Yangzhou University                 | Chinese Academy of Sciences                         |
| EPI466521 | PB1 | China   | 2012-Nov-09 | A/chicken/Jiangsu/YZ4/2012        | Yangzhou University                 | Chinese Academy of Sciences                         |
| EPI466509 | PB1 | China   | 2013-Mar-29 | A/chicken/Jiangsu/YCDT/2013       | Yangzhou University                 | Chinese Academy of Sciences                         |
| EPI466502 | PB1 | China   | 2013-Jan-23 | A/chicken/Jiangsu/CZWI5/2013      | Yangzhou University                 | Chinese Academy of Sciences                         |
| EPI466494 | PB1 | China   | 2012-Nov-20 | A/chicken/Jiangsu/CZ1/2012        | Yangzhou University                 | Chinese Academy of Sciences                         |
| EPI466480 | PB1 | China   | 2013-Apr-05 | A/chicken/Jiangsu/HA2/2013        | Yangzhou University                 | Chinese Academy of Sciences                         |
| EPI466456 | PB1 | China   | 2013-Jan-23 | A/chicken/Jiangsu/ZJ4/2013        | Yangzhou University                 | Chinese Academy of Sciences                         |
| EPI466448 | PB1 | China   | 2013-Jan-23 | A/chicken/Jiangsu/CZJT2/2013      | Yangzhou University                 | Chinese Academy of Sciences                         |
| EPI466440 | PB1 | China   | 2012-Nov-06 | A/chicken/Jiangsu/XZ6/2012        | Yangzhou University                 | Chinese Academy of Sciences                         |
| EPI466432 | PB1 | China   | 2013-Mar-28 | A/chicken/Jiangsu/ZJDT1/2013      | Yangzhou University                 | Chinese Academy of Sciences                         |
| EPI466416 | PB1 | China   | 2012-May-12 | A/chicken/Jiangsu/CZJF/2012       | Yangzhou University                 | Chinese Academy of Sciences                         |
| EPI466408 | PB1 | China   | 2012-Mar-24 | A/chicken/Jiangsu/MYJMF/2012      | Yangzhou University                 | Chinese Academy of Sciences                         |
| EPI466376 | PB1 | China   | 2011-Jan-21 | A/chicken/Jiangsu/DTNSZ/2011      | Yangzhou University                 | Chinese Academy of Sciences                         |
| EPI466360 | PB1 | China   | 2012-Feb-12 | A/chicken/Jiangsu/DT0112/2012     | Yangzhou University                 | Chinese Academy of Sciences                         |
| EPI466344 | PB1 | China   | 2012-Mar-24 | A/chicken/Jiangsu/XZWHL/2012      | Yangzhou University                 | Chinese Academy of Sciences                         |
| EPI466336 | PB1 | China   | 2012-Mar-24 | A/chicken/Jiangsu/XZZSL/2012      | Yangzhou University                 | Chinese Academy of Sciences                         |
| EPI466328 | PB1 | China   | 2012-Mar-24 | A/chicken/Jiangsu/CZLJG/2012      | Yangzhou University                 | Chinese Academy of Sciences                         |
| EPI466320 | PB1 | China   | 2009-Sep-20 | A/chicken/Jiangsu/DT/2009         | Yangzhou University                 | Chinese Academy of Sciences                         |
| EPI466312 | PB1 | China   | 2011-May-21 | A/chicken/Jiangsu/ZJDT/2011       | Yangzhou University                 | Chinese Academy of Sciences                         |
| EPI466304 | PB1 | China   | 2011-Mar-28 | A/chicken/Jiangsu/XZPZ/2011       | Yangzhou University                 | Chinese Academy of Sciences                         |
| EPI466296 | PB1 | China   | 2012-Apr-13 | A/chicken/Jiangsu/XZMG/2012       | Yangzhou University                 | Chinese Academy of Sciences                         |
| EPI466288 | PB1 | China   | 2011-Jan-26 | A/chicken/Shandong/SDWD/2011      | Yangzhou University                 | Chinese Academy of Sciences                         |
| EPI466264 | PB1 | China   | 2012-May-09 | A/chicken/Shandong/SDWF17/2012    | Yangzhou University                 | Chinese Academy of Sciences                         |
| EPI466256 | PB1 | China   | 2012-Jan-12 | A/chicken/Jiangsu/XZ38/2012       | Yangzhou University                 | Chinese Academy of Sciences                         |
| EPI466248 | PB1 | China   | 2012-May-12 | A/chicken/Jiangsu/CZZWQ/2012      | Yangzhou University                 | Chinese Academy of Sciences                         |
| EPI464928 | PB1 | Italy   | 2011-Dec-28 | A/chicken/Italy/11VIR-7548/2011   | Istituto Zooprofilattico Sperimenta | Istituto Zooprofilattico Sperimentale Delle Venezie |
| EPI457883 | PB1 | China   | 2013-May-03 | A/chicken/Guangdong/SD641/2013    | Harbin Veterinary Research Institut | Harbin Veterinary Research Institute                |

Supplementary Table 1

|           |     |           |             |                                    |                                      |                                                                  |
|-----------|-----|-----------|-------------|------------------------------------|--------------------------------------|------------------------------------------------------------------|
| EPI457875 | PB1 | China     | 2013-Apr-16 | A/chicken/Jiangsu/S002/2013        | Harbin Veterinary Research Institut  | Harbin Veterinary Research Institute                             |
| EPI457867 | PB1 | China     | 2013-Apr-16 | A/chicken/Jiangsu/SC035/2013       | Harbin Veterinary Research Institut  | Harbin Veterinary Research Institute                             |
| EPI457859 | PB1 | China     | 2013-Apr-16 | A/chicken/Jiangsu/SC099/2013       | Harbin Veterinary Research Institut  | Harbin Veterinary Research Institute                             |
| EPI457851 | PB1 | China     | 2013-Apr-16 | A/chicken/Jiangsu/SC537/2013       | Harbin Veterinary Research Institut  | Harbin Veterinary Research Institute                             |
| EPI457843 | PB1 | China     | 2013-May-03 | A/chicken/Jiangxi/SD001/2013       | Harbin Veterinary Research Institut  | Harbin Veterinary Research Institute                             |
| EPI457835 | PB1 | China     | 2013-Apr-03 | A/chicken/Shanghai/S1055/2013      | Harbin Veterinary Research Institut  | Harbin Veterinary Research Institute                             |
| EPI457827 | PB1 | China     | 2013-Apr-03 | A/chicken/Shanghai/S1076/2013      | Harbin Veterinary Research Institut  | Harbin Veterinary Research Institute                             |
| EPI457819 | PB1 | China     | 2013-Apr-03 | A/chicken/Shanghai/S1077/2013      | Harbin Veterinary Research Institut  | Harbin Veterinary Research Institute                             |
| EPI457811 | PB1 | China     | 2013-Apr-03 | A/chicken/Shanghai/S1078/2013      | Harbin Veterinary Research Institut  | Harbin Veterinary Research Institute                             |
| EPI457803 | PB1 | China     | 2013-Apr-03 | A/chicken/Shanghai/S1079/2013      | Harbin Veterinary Research Institut  | Harbin Veterinary Research Institute                             |
| EPI457795 | PB1 | China     | 2013-Apr-03 | A/chicken/Shanghai/S1080/2013      | Harbin Veterinary Research Institut  | Harbin Veterinary Research Institute                             |
| EPI457771 | PB1 | China     | 2013-Apr-03 | A/chicken/Shanghai/S1413/2013      | Harbin Veterinary Research Institut  | Harbin Veterinary Research Institute                             |
| EPI457763 | PB1 | China     | 2013-Apr-22 | A/chicken/Zhejiang/SD007/2013      | Harbin Veterinary Research Institut  | Harbin Veterinary Research Institute                             |
| EPI457755 | PB1 | China     | 2013-Apr-11 | A/chicken/Zhejiang/SD019/2013      | Harbin Veterinary Research Institut  | Harbin Veterinary Research Institute                             |
| EPI457747 | PB1 | China     | 2013-Apr-11 | A/chicken/Zhejiang/SD033/2013      | Harbin Veterinary Research Institut  | Harbin Veterinary Research Institute                             |
| EPI468356 | PB1 | China     | 2013-Apr-10 | A/chicken/Hangzhou/50-2/2013(H9N   | Hangzhou Center for Disease Contr    | Hangzhou Center for Disease Control and Prevention               |
| EPI447889 | PB1 | China     | 2013-Mar-29 | A/chicken/Anhui-Chuzhou/01/2013    |                                      | WHO Chinese National Influenza Center                            |
| EPI443665 | PB1 | China     | 2013-Apr-10 | A/chicken/Hangzhou/50-1/2013(H7N   | Hangzhou Center for Disease Contr    | Hangzhou Center for Disease Control and Prevention               |
| EPI443657 | PB1 | China     | 2013-Apr-10 | A/chicken/Hangzhou/48-1/2013(H7N   | Hangzhou Center for Disease Contr    | Hangzhou Center for Disease Control and Prevention               |
| EPI440683 | PB1 | China     | 2013-Apr-03 | A/Chicken/Shanghai/S1053/2013      | Harbin Veterinary Research Institut  | Harbin Veterinary Research Institute                             |
| EPI397850 | PB1 | Australia | 2010-Jan-01 | A/Chicken/NSW-Sydney/D809/2010     | Elizabeth Macarthur Agricultural In  | WHO Collaborating Centre for Reference and Research on Influenza |
| EPI355390 | PB1 | Egypt     | 2011-Mar-05 | A/chicken/Egypt/11vir4453-274/2011 |                                      | Istituto Zooprofilattico Sperimentale Delle Venezie              |
| EPI355112 | PB1 | Egypt     | 2010-Dec-09 | A/chicken/Egypt/11vir4453-276/2010 | Istituto Zooprofilattico Sperimenta  | Istituto Zooprofilattico Sperimentale Delle Venezie              |
| EPI355096 | PB1 | Egypt     | 2011-Mar-05 | A/chicken/Egypt/11vir4453-273/2011 | Istituto Zooprofilattico Sperimenta  | Istituto Zooprofilattico Sperimentale Delle Venezie              |
| EPI355088 | PB1 | Egypt     | 2011-Mar-05 | A/chicken/Egypt/11vir4453-272/2011 | Istituto Zooprofilattico Sperimenta  | Istituto Zooprofilattico Sperimentale Delle Venezie              |
| EPI354074 | PB1 | Indonesia | 2004-Jan-01 | A/chicken/Indonesia/R132/2004      | Friedrich-Loeffler-Institut          | Robert Koch-Institute                                            |
| EPI466240 | PB1 | China     | 2012-Mar-24 | A/chicken/Jiangsu/WJHDL/2012       | Yangzhou University                  | Chinese Academy of Sciences                                      |
| EPI459872 | PB1 | Taiwan    | 2013-May-15 | A/chicken/Taiwan/A2837/2013(H6N1   | ANIMAL HEALTH RESEARCH INSTIT        | ANIMAL HEALTH RESEARCH INSTITUTE                                 |
| EPI466464 | PB1 | China     | 2013-Apr-05 | A/duck/Jiangsu/YC2/2013            | Yangzhou University                  | Chinese Academy of Sciences                                      |
| EPI457739 | PB1 | China     | 2013-Apr-16 | A/duck/Anhui/SC702/2013            | Harbin Veterinary Research Institut  | Harbin Veterinary Research Institute                             |
| EPI457731 | PB1 | China     | 2013-Apr-16 | A/duck/Zhejiang/SC410/2013         | Harbin Veterinary Research Institut  | Harbin Veterinary Research Institute                             |
| EPI431454 | PB1 | China     | 2011-Dec-07 | A/duck/Hebei/3/2011                | Institute of Microbiology, Chinese A | Institute of Microbiology                                        |
| EPI431446 | PB1 | China     | 2011-Dec-01 | A/duck/Hebei/2/2011                | Institute of Microbiology, Chinese A | Institute of Microbiology                                        |
| EPI356408 | PB1 | Germany   | 2009-Jan-01 | A/wild duck/Germany-BY/R2892/2009  |                                      | Friedrich-Loeffler-Institut                                      |

Supplementary Table 1

|           |     |         |             |                                      |                                       |                                                     |
|-----------|-----|---------|-------------|--------------------------------------|---------------------------------------|-----------------------------------------------------|
| EPI466212 | PB1 | China   | 2013-Mar-28 | A/Mallard/Zhejiang/136/2013          | State Key Laboratory of Virology an   | Chinese Academy of Sciences                         |
| EPI356415 | PB1 | Germany | 2006-Jan-01 | A/herring gull/Germany-MV/R2792/2006 |                                       | Friedrich-Loeffler-Institut                         |
| EPI466488 | PB1 | China   | 2013-Apr-06 | A/quail/Jiangsu/WX3/2013             | Yangzhou University                   | Chinese Academy of Sciences                         |
| EPI464936 | PB1 | Italy   | 2012-Aug-31 | A/turkey/Italy/12VIR-6607-5/2012     | Istituto Zooprofilattico Sperimentale | Istituto Zooprofilattico Sperimentale Delle Venezie |
| EPI457627 | PB1 | China   | 2013-Apr-03 | A/pigeon/Shanghai/S1423/2013         | Harbin Veterinary Research Institut   | Harbin Veterinary Research Institute                |
| EPI411929 | PB1 | Germany | 2010-Jan-01 | A/swine/Germany/R819/2010            |                                       | Friedrich-Loeffler-Institut                         |
| EPI411887 | PB1 | Germany | 2009-Jan-01 | A/swine/Germany/R2807/2009           |                                       | Friedrich-Loeffler-Institut                         |
| EPI412044 | PB1 | Germany | 2011-Jan-01 | A/swine/Germany/R2035/2011           |                                       | Friedrich-Loeffler-Institut                         |
| EPI356439 | PB1 | Germany | 2011-Jan-01 | A/swine/Iceland/R117/2011            | University of Iceland                 | Friedrich-Loeffler-Institut                         |
| EPI497519 | PB1 | China   | 2013-Feb-27 | A/environment/Jiangxi/00449/2013     |                                       | WHO Chinese National Influenza Center               |
| EPI457651 | PB1 | China   | 2013-Apr-03 | A/environment/Shanghai/S1439/2013    | Harbin Veterinary Research Institut   | Harbin Veterinary Research Institute                |
| EPI473791 | PB1 | China   | 2013-Apr-04 | A/environment/Hangzhou/34-2/2013     | Hangzhou Center for Disease Contr     | Hangzhou Center for Disease Control and Prevention  |
| EPI443673 | PB1 | China   | 2013-Apr-12 | A/environment/Hangzhou/109-1/2013    | Hangzhou Center for Disease Contr     | Hangzhou Center for Disease Control and Prevention  |
| EPI490985 | PB1 | China   | 2013-Apr-17 | A/environment/Guangdong/C132800      | Guangdong Provincial Center for Di    | Guandong Centers for Disease Control                |
| EPI490977 | PB1 | China   | 2013-Apr-26 | A/Environment/Guangdong/C132810      | Guangdong Provincial Center for Di    | Guandong Centers for Disease Control                |
| EPI432515 | PB1 | China   | 2010-Apr-27 | r7                                   | Harbin Veterinary Research Institut   | Harbin Veterinary Research Institute                |
| EPI432475 | PB1 | China   | 2010-Apr-21 | r58                                  | Harbin Veterinary Research Institut   | Harbin Veterinary Research Institute                |
| EPI432411 | PB1 | China   | 2010-Apr-16 | r38                                  | Harbin Veterinary Research Institut   | Harbin Veterinary Research Institute                |
| EPI432363 | PB1 | China   | 2010-Apr-10 | r36                                  | Harbin Veterinary Research Institut   | Harbin Veterinary Research Institute                |
| EPI432323 | PB1 | China   | 2010-Apr-03 | r35678                               | Harbin Veterinary Research Institut   | Harbin Veterinary Research Institute                |
| EPI432275 | PB1 | China   | 2010-Mar-28 | r278                                 | Harbin Veterinary Research Institut   | Harbin Veterinary Research Institute                |
| EPI432211 | PB1 | China   | 2010-Mar-22 | r257                                 | Harbin Veterinary Research Institut   | Harbin Veterinary Research Institute                |
| EPI432155 | PB1 | China   | 2010-Mar-17 | r2378                                | Harbin Veterinary Research Institut   | Harbin Veterinary Research Institute                |
| EPI432051 | PB1 | China   | 2010-Mar-07 | r235                                 | Harbin Veterinary Research Institut   | Harbin Veterinary Research Institute                |
| EPI432043 | PB1 | China   | 2010-Mar-02 | r23                                  | Harbin Veterinary Research Institut   | Harbin Veterinary Research Institute                |
| EPI432019 | PB1 | China   | 2010-Mar-02 | r178                                 | Harbin Veterinary Research Institut   | Harbin Veterinary Research Institute                |
| EPI432011 | PB1 | China   | 2010-Mar-02 | r17                                  | Harbin Veterinary Research Institut   | Harbin Veterinary Research Institute                |
| EPI431995 | PB1 | China   | 2012-Feb-25 | r1678                                | Harbin Veterinary Research Institut   | Harbin Veterinary Research Institute                |
| EPI431963 | PB1 | China   | 2012-Feb-25 | r1578                                | Harbin Veterinary Research Institut   | Harbin Veterinary Research Institute                |
| EPI431891 | PB1 | China   | 2010-Feb-10 | r137                                 | Harbin Veterinary Research Institut   | Harbin Veterinary Research Institute                |
| EPI431859 | PB1 | China   | 2010-Feb-10 | r136                                 | Harbin Veterinary Research Institut   | Harbin Veterinary Research Institute                |
| EPI431771 | PB1 | China   | 2010-Jan-31 | r1278                                | Harbin Veterinary Research Institut   | Harbin Veterinary Research Institute                |
| EPI431755 | PB1 | China   | 2010-Jan-26 | r1268                                | Harbin Veterinary Research Institut   | Harbin Veterinary Research Institute                |
| EPI431747 | PB1 | China   | 2010-Jan-26 | r12678                               | Harbin Veterinary Research Institut   | Harbin Veterinary Research Institute                |

Supplementary Table 1

|           |     |              |             |                            |                                      |                                                                        |
|-----------|-----|--------------|-------------|----------------------------|--------------------------------------|------------------------------------------------------------------------|
| EPI431675 | PB1 | China        | 2010-Jan-20 | r1256                      | Harbin Veterinary Research Institut  | Harbin Veterinary Research Institute                                   |
| EPI431667 | PB1 | China        | 2010-Jan-20 | r125                       | Harbin Veterinary Research Institut  | Harbin Veterinary Research Institute                                   |
| EPI431627 | PB1 | China        | 2010-Jan-16 | r123678                    | Harbin Veterinary Research Institut  | Harbin Veterinary Research Institute                                   |
| EPI431571 | PB1 | China        | 2010-Jan-10 | r1235678                   | Harbin Veterinary Research Institut  | Harbin Veterinary Research Institute                                   |
| EPI431563 | PB1 | China        | 2010-Jan-04 | r123567                    | Harbin Veterinary Research Institut  | Harbin Veterinary Research Institute                                   |
| EPI431523 | PB1 | China        | 2010-Jan-04 | r1                         | Harbin Veterinary Research Institut  | Harbin Veterinary Research Institute                                   |
| EPI492803 | PB1 | United State | 2013-Nov-11 | A/Louisiana/13/2013        | Louisiana Department of Health an    | Centers for Disease Control and Prevention                             |
| EPI492715 | PB1 | Bangladesh   | 2013-May-12 | A/Bangladesh/9269/2013     | Institute of Epidemiology Disease C  | Centers for Disease Control and Prevention                             |
| EPI539681 | PB1 | Australia    | 2013-Jun-29 | A/TOWNSVILLE/41/2013       | Queensland Health Scientific Servic  | WHO Collaborating Centre for Reference and Research on Influenza       |
| EPI539656 | PB1 | Papua New    | 2013-Jul-02 | A/GOROKA/27/2013           | Papua New Guinea Institute of Med    | WHO Collaborating Centre for Reference and Research on Influenza       |
| EPI490880 | PB1 | Hong Kong    | 2013-Nov-30 | A/Hong Kong/5942/2013      | Public Health Laboratory Services B  | Public Health Laboratory Services Branch, Centre for Health Protection |
| EPI490091 | PB1 | United State | 2012-Oct-20 | A/New York/39/2012         | New York State Department of Hea     | Centers for Disease Control and Prevention                             |
| EPI486650 | PB1 | United State | 2013-Oct-21 | A/Louisiana/10/2013        | Louisiana Department of Health an    | Centers for Disease Control and Prevention                             |
| EPI486642 | PB1 | United State | 2013-Oct-23 | A/Louisiana/11/2013        | Louisiana Department of Health an    | Centers for Disease Control and Prevention                             |
| EPI484689 | PB1 | Sweden       | 2009-Sep-02 | A/Umea/4/2009/             |                                      | Swedish National Institute for Communicable Disease Control            |
| EPI484665 | PB1 | Sweden       | 2011-Dec-28 | A/Stockholm/43/2011        |                                      | Swedish National Institute for Communicable Disease Control            |
| EPI484657 | PB1 | Sweden       | 2012-Jan-12 | A/Stockholm/12/2012        |                                      | Swedish National Institute for Communicable Disease Control            |
| EPI484563 | PB1 | United State | 2013-Jul-14 | A/Georgia/03/2013          | Georgia Public Health Laboratory     | Centers for Disease Control and Prevention                             |
| EPI484514 | PB1 | United State | 2013-Aug-15 | A/Arkansas/13/2013         | Arkansas Department of Health        | Centers for Disease Control and Prevention                             |
| EPI484420 | PB1 | Sweden       | 2013-Mar-22 | A/Sweden/137/2013          |                                      | Swedish National Institute for Communicable Disease Control            |
| EPI484380 | PB1 | Sweden       | 2013-Feb-15 | A/Sweden/132/2013          |                                      | Swedish National Institute for Communicable Disease Control            |
| EPI484372 | PB1 | Sweden       | 2013-Feb-15 | A/Sweden/131/2013          |                                      | Swedish National Institute for Communicable Disease Control            |
| EPI484324 | PB1 | Sweden       | 2013-Jan-22 | A/Sweden/125/2013          |                                      | Swedish National Institute for Communicable Disease Control            |
| EPI484316 | PB1 | Sweden       | 2013-Jan-23 | A/Sweden/124/2013          |                                      | Swedish National Institute for Communicable Disease Control            |
| EPI484308 | PB1 | Sweden       | 2013-Jan-18 | A/Sweden/123/2013          |                                      | Swedish National Institute for Communicable Disease Control            |
| EPI484284 | PB1 | Sweden       | 2013-Jan-11 | A/Sweden/121/2013          | Swedish Institute for Infectious Dis | Swedish National Institute for Communicable Disease Control            |
| EPI484269 | PB1 | Sweden       | 2013-Jan-13 | A/Sweden/119/2013          | Swedish Institute for Infectious Dis | Swedish National Institute for Communicable Disease Control            |
| EPI484261 | PB1 | Sweden       | 2013-Jan-07 | A/Sweden/118/2013          | Swedish Institute for Infectious Dis | Swedish National Institute for Communicable Disease Control            |
| EPI484245 | PB1 | Sweden       | 2012-Dec-27 | A/Sweden/35/2012           | Swedish Institute for Infectious Dis | Swedish National Institute for Communicable Disease Control            |
| EPI477493 | PB1 | Australia    | 2013-Mar-04 | A/SYDNEY/506/2013          | Prince of Wales Hospital             | WHO Collaborating Centre for Reference and Research on Influenza       |
| EPI467438 | PB1 | American Sa  | 2013-Feb-22 | A/American Samoa/4786/2013 | State of Hawaii Department of Hea    | Centers for Disease Control and Prevention                             |
| EPI466850 | PB1 | Ukraine      | 2013-Mar-20 | A/Zaporizza/417/2013       | Institute of Epidemiology and Infec  | Centers for Disease Control and Prevention                             |
| EPI466843 | PB1 | Brazil       | 2013-May-22 | A/Brazil/0328/2013         | Instituto Adolfo Lutz                | Centers for Disease Control and Prevention                             |
| EPI466055 | PB1 | Finland      | 2009-Nov-15 | A/Finland/722/2009(H1N1)   | Helsingin-Uusimaa Labotariokeskus    | Institute for Molecular Medicine Finland (FIMM)                        |

Supplementary Table 1

|           |     |               |             |                          |                                                                       |                                                                  |
|-----------|-----|---------------|-------------|--------------------------|-----------------------------------------------------------------------|------------------------------------------------------------------|
| EPI466039 | PB1 | Finland       | 2009-Nov-12 | A/Finland/720/2009(H1N1) | Helsingin-Uusimaa Labotariokeskus                                     | Institute for Molecular Medicine Finland (FIMM)                  |
| EPI466023 | PB1 | Finland       | 2009-Nov-11 | A/Finland/718/2009(H1N1) | Helsingin-Uusimaa Labotariokeskus                                     | Institute for Molecular Medicine Finland (FIMM)                  |
| EPI464509 | PB1 | United States | 2013-Jul-16 | A/Indiana/10/2013        | Indiana State Department of Health                                    | Centers for Disease Control and Prevention                       |
| EPI499458 | PB1 | Japan         | 2013-Apr-17 | A/HIROSHIMA/19/2013      | Center for Public Health and Environment                              | National Institute of Infectious Diseases (NIID)                 |
| EPI460773 | PB1 | China         | 2013-Apr-25 | A/Nanjing/5/2013         |                                                                       | institution of microbiology                                      |
| EPI460749 | PB1 | China         | 2013-Apr-09 | A/Nanjing/f0874/2013     | Jiangsu Provincial Center for Disease Control and Prevention          | institution of microbiology                                      |
| EPI459853 | PB1 | Taiwan        | 2013-May-07 | A/Taiwan/2/2013          | National Influenza Center, Centers for Disease Control and Prevention | Taiwan CDC                                                       |
| EPI453648 | PB1 | China         | 2013-Apr-26 | A/Nanjing/M2/2013        | Jiangsu Provincial Center for Disease Control and Prevention          | institution of microbiology                                      |
| EPI447671 | PB1 | China         | 2013-Apr-03 | A/Jiangsu/07/2013        |                                                                       | WHO Chinese National Influenza Center                            |
| EPI447720 | PB1 | China         | 2013-Apr-21 | A/Shandong/01/2013       |                                                                       | WHO Chinese National Influenza Center                            |
| EPI447727 | PB1 | China         | 2013-Apr-16 | A/Henan/01/2013          |                                                                       | WHO Chinese National Influenza Center                            |
| EPI447897 | PB1 | China         | 2013-Mar-18 | A/Shanghai/07/2013       |                                                                       | WHO Chinese National Influenza Center                            |
| EPI447920 | PB1 | China         | 2013-Mar-30 | A/Jiangsu/01/2013        |                                                                       | WHO Chinese National Influenza Center                            |
| EPI446140 | PB1 | Kenya         | 2010-Jun-04 | A/Nairobi/80/2010        | ARI Unit, Kenya Medical Research Institute                            | Kenya Medical Research Institute                                 |
| EPI446062 | PB1 | Kenya         | 2009-Oct-27 | A/Kikuyu/185/2009        | ARI Unit, Kenya Medical Research Institute                            | Kenya Medical Research Institute                                 |
| EPI446027 | PB1 | Kenya         | 2009-Oct-29 | A/Kakamega/215/2009      | ARI Unit, Kenya Medical Research Institute                            | Kenya Medical Research Institute                                 |
| EPI443732 | PB1 | United States | 2013-Feb-20 | A/Alaska/02/2013         | Alaska State Virology Lab                                             | Centers for Disease Control and Prevention                       |
| EPI443283 | PB1 | Kenya         | 2009-Oct-08 | A/Mombasa/91/2009        | ARI Unit, Kenya Medical Research Institute                            | Kenya Medical Research Institute                                 |
| EPI443196 | PB1 | Kenya         | 2009-Sep-24 | A/Eldoret/119/2009       | ARI Unit, Kenya Medical Research Institute                            | Kenya Medical Research Institute                                 |
| EPI443189 | PB1 | Kenya         | 2009-Sep-24 | A/Malindi/238/2009       | ARI Unit, Kenya Medical Research Institute                            | Kenya Medical Research Institute                                 |
| EPI439501 | PB1 | China         | 2013-Mar-05 | A/Shanghai/2/2013        |                                                                       | WHO Chinese National Influenza Center                            |
| EPI440007 | PB1 | India         | 2012-Dec-22 | A/India/2192/2012        | All India Institute of Medical Sciences                               | Centers for Disease Control and Prevention                       |
| EPI426139 | PB1 | United States | 2012-Oct-20 | A/New York/39/2012       | New York State Department of Health                                   | Centers for Disease Control and Prevention                       |
| EPI440008 | PB1 | United States | 2012-Jun-17 | A/Washington/24/2012     | Washington State Public Health Laboratory                             | Centers for Disease Control and Prevention                       |
| EPI418108 | PB1 | Thailand      | 2012-Oct-02 | A/Chiang Rai/312/2012    | WHO National Influenza Centre, Nakhon Phanom                          | Centers for Disease Control and Prevention                       |
| EPI450412 | PB1 | New Zealand   | 2012-Aug-01 | A/AUCKLAND/64/2012       | Auckland Hospital                                                     | WHO Collaborating Centre for Reference and Research on Influenza |
| EPI407277 | PB1 | United States | 2012-Nov-13 | A/Minnesota/18/2012      | Minnesota Department of Health                                        | Centers for Disease Control and Prevention                       |
| EPI407269 | PB1 | United States | 2012-Nov-13 | A/Minnesota/18/2012      | Minnesota Department of Health                                        | Centers for Disease Control and Prevention                       |
| EPI404888 | PB1 | United States | 2012-Nov-17 | A/Iowa/16/2012           | Iowa State Hygienic Laboratory                                        | Centers for Disease Control and Prevention                       |
| EPI397937 | PB1 | United States | 2012-Aug-04 | A/Ohio/41/2012           | Ohio Department of Health Laboratory                                  | Centers for Disease Control and Prevention                       |
| EPI397923 | PB1 | United States | 2012-Jul-27 | A/Ohio/18/2012           | Ohio Department of Health Laboratory                                  | Centers for Disease Control and Prevention                       |
| EPI397757 | PB1 | United States | 2012-Aug-22 | A/Wisconsin/35/2012      | Wisconsin State Laboratory of Hygiene                                 | Centers for Disease Control and Prevention                       |
| EPI397670 | PB1 | United States | 2012-Aug-27 | A/Minnesota/14/2012      | Minnesota Department of Health                                        | Centers for Disease Control and Prevention                       |
| EPI397553 | PB1 | United States | 2012-Aug-15 | A/Ohio/86/2012           | Ohio Department of Health Laboratory                                  | Centers for Disease Control and Prevention                       |

Supplementary Table 1

|           |     |               |             |                               |                                                    |                                                                  |
|-----------|-----|---------------|-------------|-------------------------------|----------------------------------------------------|------------------------------------------------------------------|
| EPI397945 | PB1 | United States | 2012-Aug-13 | A/Ohio/84/2012                | Ohio Department of Health Laboratory               | Centers for Disease Control and Prevention                       |
| EPI397501 | PB1 | United States | 2012-Aug-03 | A/Indiana/104/2012            | Indiana State Department of Health                 | Centers for Disease Control and Prevention                       |
| EPI397438 | PB1 | United States | 2012-Aug-20 | A/Wisconsin/30/2012           | Wisconsin State Laboratory of Hygiene              | Centers for Disease Control and Prevention                       |
| EPI397383 | PB1 | United States | 2012-Aug-06 | A/Indiana/138/2012            | Indiana State Department of Health                 | Centers for Disease Control and Prevention                       |
| EPI397238 | PB1 | Canada        | 2012-Aug-10 | A/Ontario/N163578/2012(H1N1v) | Public Health Ontario                              | Ontario Agency for Health Protection and Promotion (OAHP)        |
| EPI397105 | PB1 | United States | 2012-Aug-04 | A/Indiana/115/2012            | Indiana State Department of Health                 | Centers for Disease Control and Prevention                       |
| EPI405008 | PB1 | Puerto Rico   | 2012-Jun-27 | A/Puerto Rico/36/2012         | Puerto Rico Department of Health                   | Centers for Disease Control and Prevention                       |
| EPI396297 | PB1 | United States | 2012-Aug-18 | A/Maryland/23/2012            | Maryland Department of Health and General Services | Centers for Disease Control and Prevention                       |
| EPI396284 | PB1 | United States | 2012-Aug-06 | A/Ohio/43/2012                | Ohio Department of Health Laboratory               | Centers for Disease Control and Prevention                       |
| EPI397221 | PB1 | United States | 2012-Aug-08 | A/Indiana/144/2012            | Indiana State Department of Health                 | Centers for Disease Control and Prevention                       |
| EPI396275 | PB1 | United States | 2012-Aug-08 | A/Indiana/135/2012            | Indiana State Department of Health                 | Centers for Disease Control and Prevention                       |
| EPI396252 | PB1 | United States | 2012-Aug-04 | A/Indiana/126/2012            | Indiana State Department of Health                 | Centers for Disease Control and Prevention                       |
| EPI396238 | PB1 | United States | 2012-Aug-05 | A/Indiana/103/2012            | Indiana State Department of Health                 | Centers for Disease Control and Prevention                       |
| EPI397339 | PB1 | United States | 2012-Aug-08 | A/Indiana/150/2012            | Indiana State Department of Health                 | Centers for Disease Control and Prevention                       |
| EPI396212 | PB1 | United States | 2012-Aug-05 | A/Indiana/113/2012            | Indiana State Department of Health                 | Centers for Disease Control and Prevention                       |
| EPI396206 | PB1 | United States | 2012-Aug-05 | A/Indiana/149/2012            | Indiana State Department of Health                 | Centers for Disease Control and Prevention                       |
| EPI396195 | PB1 | United States | 2012-Aug-09 | A/Ohio/78/2012                | Ohio Department of Health Laboratory               | Centers for Disease Control and Prevention                       |
| EPI395319 | PB1 | United States | 2012-Aug-16 | A/Missouri/12/2012            | Missouri Department of Health & Senior Services    | Centers for Disease Control and Prevention                       |
| EPI394890 | PB1 | United States | 2012-Jun-17 | A/Washington/24/2012          | Washington State Public Health Laboratory          | Centers for Disease Control and Prevention                       |
| EPI394114 | PB1 | Australia     | 2012-Jun-24 | A/TASMANIA/12/2012            | Royal Hobart Hospital                              | WHO Collaborating Centre for Reference and Research on Influenza |
| EPI393686 | PB1 | United States | 2012-Jul-30 | A/Ohio/23/2012                | Ohio Department of Health Laboratory               | Centers for Disease Control and Prevention                       |
| EPI393315 | PB1 | United States | 2012-Aug-04 | A/Ohio/38/2012                | Ohio Department of Health Laboratory               | Centers for Disease Control and Prevention                       |
| EPI393304 | PB1 | United States | 2012-Jul-29 | A/Indiana/18/2012             | Indiana State Department of Health                 | Centers for Disease Control and Prevention                       |
| EPI392932 | PB1 | United States | 2012-Aug-15 | A/Minnesota/11/2012           | Minnesota Department of Health                     | Centers for Disease Control and Prevention                       |
| EPI393525 | PB1 | United States | 2012-Aug-09 | A/West Virginia/15/2012       | West Virginia Office of Laboratory Medicine        | Centers for Disease Control and Prevention                       |
| EPI388380 | PB1 | United States | 2007-Aug-19 | A/Michigan/09/2007            | Michigan Department of Community Health            | Centers for Disease Control and Prevention                       |
| EPI388372 | PB1 | United States | 2011-Nov-04 | A/Minnesota/19/2011           | Minnesota Department of Health                     | Centers for Disease Control and Prevention                       |
| EPI393296 | PB1 | United States | 2012-Jul-31 | A/Indiana/21/2012             | Indiana State Department of Health                 | Centers for Disease Control and Prevention                       |
| EPI388337 | PB1 | United States | 2012-Jul-28 | A/Ohio/16/2012                | Ohio Department of Health Laboratory               | Centers for Disease Control and Prevention                       |
| EPI388326 | PB1 | United States | 2012-Jul-30 | A/Indiana/14/2012             | Indiana State Department of Health                 | Centers for Disease Control and Prevention                       |
| EPI388296 | PB1 | United States | 2012-Jul-29 | A/Indiana/19/2012             | Indiana State Department of Health                 | Centers for Disease Control and Prevention                       |
| EPI388280 | PB1 | United States | 2012-Jul-26 | A/Indiana/13/2012             | Indiana State Department of Health                 | Centers for Disease Control and Prevention                       |
| EPI379606 | PB1 | Australia     | 2012-Mar-19 | A/BRISBANE/27/2012            | Queensland Health Scientific Services              | WHO Collaborating Centre for Reference and Research on Influenza |
| EPI379583 | PB1 | Australia     | 2012-May-09 | A/VICTORIA/802/2012           | Austin Health                                      | WHO Collaborating Centre for Reference and Research on Influenza |

Supplementary Table 1

|           |     |                  |             |                          |                                     |                                                                  |
|-----------|-----|------------------|-------------|--------------------------|-------------------------------------|------------------------------------------------------------------|
| EPI450447 | PB1 | Australia        | 2012-May-28 | A/VICTORIA/514/2012      | Monash Medical Centre               | WHO Collaborating Centre for Reference and Research on Influenza |
| EPI378521 | PB1 | United States    | 2012-Jul-16 | A/Indiana/09/2012        | Indiana State Department of Health  | Centers for Disease Control and Prevention                       |
| EPI372953 | PB1 | Egypt            | 2011-Dec-21 | A/Egypt/N14976/2011      | U.S. Naval Medical Research Unit N  | Centers for Disease Control and Prevention                       |
| EPI372945 | PB1 | Egypt            | 2011-Dec-15 | A/Egypt/N11470/2011      | U.S. Naval Medical Research Unit N  | Centers for Disease Control and Prevention                       |
| EPI372929 | PB1 | Egypt            | 2011-Sep-21 | A/Egypt/N09966/2011      | U.S. Naval Medical Research Unit N  | Centers for Disease Control and Prevention                       |
| EPI372897 | PB1 | Egypt            | 2011-Jan-01 | A/Egypt/N0423/2011       | U.S. Naval Medical Research Unit N  | Centers for Disease Control and Prevention                       |
| EPI372873 | PB1 | Egypt            | 2011-Jan-01 | A/Egypt/N0677/2011       | U.S. Naval Medical Research Unit N  | Centers for Disease Control and Prevention                       |
| EPI372813 | PB1 | Egypt            | 2010-Feb-12 | A/Egypt/N01982/2010      | U.S. Naval Medical Research Unit N  | Centers for Disease Control and Prevention                       |
| EPI372807 | PB1 | Egypt            | 2010-Feb-07 | A/Egypt/N01644/2010      | U.S. Naval Medical Research Unit N  | Centers for Disease Control and Prevention                       |
| EPI372765 | PB1 | Egypt            | 2009-Mar-14 | A/Egypt/2563-NAMRU3/2009 | U.S. Naval Medical Research Unit N  | Centers for Disease Control and Prevention                       |
| EPI372751 | PB1 | Egypt            | 2009-May-13 | A/Egypt/4935-NAMRU3/2009 | U.S. Naval Medical Research Unit N  | Centers for Disease Control and Prevention                       |
| EPI372739 | PB1 | Egypt            | 2009-May-25 | A/Egypt/4822-NAMRU3/2009 | U.S. Naval Medical Research Unit N  | Centers for Disease Control and Prevention                       |
| EPI372733 | PB1 | Egypt            | 2009-Aug-26 | A/Egypt/9174-NAMRU3/2009 | U.S. Naval Medical Research Unit N  | Centers for Disease Control and Prevention                       |
| EPI372721 | PB1 | Egypt            | 2009-May-18 | A/Egypt/4526-NAMRU3/2009 | U.S. Naval Medical Research Unit N  | Centers for Disease Control and Prevention                       |
| EPI372707 | PB1 | Egypt            | 2009-Jan-01 | A/Egypt/0585-NAMRU3/2009 | U.S. Naval Medical Research Unit N  | Centers for Disease Control and Prevention                       |
| EPI372695 | PB1 | Egypt            | 2009-Jan-01 | A/Egypt/2039-NAMRU3/2009 | U.S. Naval Medical Research Unit N  | Centers for Disease Control and Prevention                       |
| EPI372677 | PB1 | Egypt            | 2009-Jan-01 | A/Egypt/0605-NAMRU3/2009 | U.S. Naval Medical Research Unit N  | Centers for Disease Control and Prevention                       |
| EPI372671 | PB1 | Egypt            | 2008-Jan-01 | A/Egypt/3401-NAMRU3/2008 | U.S. Naval Medical Research Unit N  | Centers for Disease Control and Prevention                       |
| EPI372651 | PB1 | Egypt            | 2008-Mar-08 | A/Egypt/2546-NAMRU3/2008 | U.S. Naval Medical Research Unit N  | Centers for Disease Control and Prevention                       |
| EPI372633 | PB1 | Egypt            | 2007-Dec-29 | A/Egypt/0217-NAMRU3/2007 | U.S. Naval Medical Research Unit N  | Centers for Disease Control and Prevention                       |
| EPI372621 | PB1 | Egypt            | 2007-Dec-26 | A/Egypt/0215-NAMRU3/2007 | U.S. Naval Medical Research Unit N  | Centers for Disease Control and Prevention                       |
| EPI372603 | PB1 | Egypt            | 2007-Jun-10 | A/Egypt/4082-NAMRU3/2007 | U.S. Naval Medical Research Unit N  | Centers for Disease Control and Prevention                       |
| EPI393763 | PB1 | United States    | 2012-Jan-30 | A/Rhode Island/01/2012   | Rhode Island Department of Health   | Centers for Disease Control and Prevention                       |
| EPI370327 | PB1 | Philippines      | 2011-Oct-21 | A/PHILIPPINES/3948/2011  | Research Institute of Tropical Medi | WHO Collaborating Centre for Reference and Research on Influenza |
| EPI376939 | PB1 | Australia        | 2011-Dec-12 | A/PERTH/305/2011         | Pathwest QE II Medical Centre       | WHO Collaborating Centre for Reference and Research on Influenza |
| EPI370109 | PB1 | Philippines      | 2011-Oct-25 | A/PHILIPPINES/3969/2011  | Research Institute of Tropical Medi | WHO Collaborating Centre for Reference and Research on Influenza |
| EPI376956 | PB1 | Australia        | 2011-Dec-07 | A/VICTORIA/893/2011      | Austin Health                       | WHO Collaborating Centre for Reference and Research on Influenza |
| EPI368648 | PB1 | United States    | 2012-Jan-26 | A/Texas/23/2012          | Texas Department of State Health S  | Centers for Disease Control and Prevention                       |
| EPI366028 | PB1 | United States    | 2012-Mar-29 | A/Utah/10/2012           | Utah Department of Health           | Centers for Disease Control and Prevention                       |
| EPI363010 | PB1 | United States    | 2012-Mar-02 | A/Washington/16/2012     | Spokane Regional Health District    | Centers for Disease Control and Prevention                       |
| EPI359096 | PB1 | United States    | 2012-Mar-05 | A/Maryland/04/2012       | Maryland Department of Health an    | Centers for Disease Control and Prevention                       |
| EPI370185 | PB1 | Papua New Guinea | 2011-Jul-27 | A/GOROKA/5/2011          | Papua New Guinea Institute of Med   | WHO Collaborating Centre for Reference and Research on Influenza |
| EPI370446 | PB1 | New Zealand      | 2011-Sep-06 | A/CHRISTCHURCH/60/2011   | Canterbury Health Services          | WHO Collaborating Centre for Reference and Research on Influenza |
| EPI357515 | PB1 | Kenya            | 2011-Nov-10 | A/Kenya/196/2011         | US Army Medical Research Unit - K   | USAMRU-K                                                         |



Supplementary Table 1

|           |     |            |             |                                   |                                     |                                                                  |
|-----------|-----|------------|-------------|-----------------------------------|-------------------------------------|------------------------------------------------------------------|
| EPI356428 | PB1 | Germany    | 2011-Jan-01 | A/Germany-MV/R26/2011             |                                     | Friedrich-Loeffler-Institut                                      |
| EPI353909 | PB1 | Mexico     | 2012-Jan-02 | A/Mexico/254/2012                 | Laboratorio de Virus Respiratorio   | Centers for Disease Control and Prevention                       |
| EPI349267 | PB1 | Australia  | 2011-Aug-29 | A/SYDNEY/525/2011                 | Childrens Hospital Westmead         | WHO Collaborating Centre for Reference and Research on Influenza |
| EPI370193 | PB1 | Australia  | 2011-Oct-24 | A/Victoria/361/2011               | Melbourne Pathology                 | WHO Collaborating Centre for Reference and Research on Influenza |
| EPI351320 | PB1 | Thailand   | 2011-Sep-20 | A/Chiang Rai/277/2011             | WHO National Influenza Centre, Na   | Centers for Disease Control and Prevention                       |
| EPI448173 | PB1 | Bangladesh | 2011-May-23 | A/chicken/Bangladesh/3072/2011    | Institute of Epidemiology Disease C | Centers for Disease Control and Prevention                       |
| EPI448125 | PB1 | Bangladesh | 2011-Feb-20 | A/chicken/Bangladesh/31289-1/2011 | Institute of Epidemiology Disease C | Centers for Disease Control and Prevention                       |
| EPI448085 | PB1 | Bangladesh | 2010-Jan-12 | A/chicken/Bangladesh/0411/2010    | Institute of Epidemiology Disease C | Centers for Disease Control and Prevention                       |
| EPI448077 | PB1 | Bangladesh | 2010-Jan-04 | A/chicken/Bangladesh/1012/2010    | Institute of Epidemiology Disease C | Centers for Disease Control and Prevention                       |
| EPI448069 | PB1 | Bangladesh | 2010-Jan-04 | A/chicken/Bangladesh/0912/2010    | Institute of Epidemiology Disease C | Centers for Disease Control and Prevention                       |
| EPI425921 | PB1 | Vietnam    | 2012-Jul-16 | A/duck/Vietnam/NCVD-1547/2012     | National Centre of Veterinary Diagn | Centers for Disease Control and Prevention                       |
| EPI425881 | PB1 | Vietnam    | 2012-Feb-01 | A/duck/Vietnam/NCVD-1182/2012     | National Centre of Veterinary Diagn | Centers for Disease Control and Prevention                       |
| EPI425849 | PB1 | Vietnam    | 2011-Nov-26 | A/duck/Vietnam/NCVD3-31/2011      | National Centre of Veterinary Diagn | Centers for Disease Control and Prevention                       |
| EPI425841 | PB1 | Vietnam    | 2011-Nov-26 | A/duck/Vietnam/NCVD3-8/2011       | National Centre of Veterinary Diagn | Centers for Disease Control and Prevention                       |
| EPI425825 | PB1 | Vietnam    | 2011-Sep-08 | A/chicken/Vietnam/NCVD-1059/2011  | National Centre of Veterinary Diagn | Centers for Disease Control and Prevention                       |
| EPI425809 | PB1 | Vietnam    | 2011-Sep-07 | A/duck/Vietnam/NCVD-1048/2011     | National Centre of Veterinary Diagn | Centers for Disease Control and Prevention                       |
| EPI425801 | PB1 | Vietnam    | 2011-Sep-07 | A/duck/Vietnam/NCVD-1044/2011     | National Centre of Veterinary Diagn | Centers for Disease Control and Prevention                       |
| EPI425777 | PB1 | Vietnam    | 2011-Sep-07 | A/chicken/Vietnam/NCVD-1034/2011  | National Centre of Veterinary Diagn | Centers for Disease Control and Prevention                       |
| EPI425662 | PB1 | Vietnam    | 2012-Feb-04 | A/chicken/Vietnam/NCVD-1188/2012  | National Centre of Veterinary Diagn | Centers for Disease Control and Prevention                       |
| EPI425574 | PB1 | Vietnam    | 2011-Jun-15 | A/chicken/Vietnam/NCVD-879/2011   | National Centre of Veterinary Diagn | Centers for Disease Control and Prevention                       |
| EPI425526 | PB1 | Vietnam    | 2011-Mar-19 | A/chicken/Vietnam/NCVD-802/2011   | National Centre of Veterinary Diagn | Centers for Disease Control and Prevention                       |
| EPI425510 | PB1 | Vietnam    | 2011-Feb-25 | A/chicken/Vietnam/NCVD-777/2011   | National Centre of Veterinary Diagn | Centers for Disease Control and Prevention                       |
| EPI425502 | PB1 | Vietnam    | 2011-Mar-18 | A/duck/Vietnam/NCVD-946/2011      | National Centre of Veterinary Diagn | Centers for Disease Control and Prevention                       |
| EPI425462 | PB1 | Vietnam    | 2012-Feb-20 | A/duck/Vietnam/NCVD-1280/2012     | National Centre of Veterinary Diagn | Centers for Disease Control and Prevention                       |
| EPI425398 | PB1 | Vietnam    | 2012-Feb-18 | A/muscovy duck/Vietnam/NCVD-1256  | National Centre of Veterinary Diagn | Centers for Disease Control and Prevention                       |
| EPI425350 | PB1 | Vietnam    | 2012-Feb-10 | A/chicken/Vietnam/NCVD-1223/2012  | National Centre of Veterinary Diagn | Centers for Disease Control and Prevention                       |
| EPI425286 | PB1 | Vietnam    | 2011-Jan-01 | A/duck/Vietnam/NCVD-674/2011      | National Centre of Veterinary Diagn | Centers for Disease Control and Prevention                       |
| EPI425254 | PB1 | Vietnam    | 2012-Jan-30 | A/dove/Vietnam/NCVD-1178/2012     | National Centre of Veterinary Diagn | Centers for Disease Control and Prevention                       |
| EPI425206 | PB1 | Vietnam    | 2012-Feb-04 | A/chicken/Vietnam/NCVD-1192/2012  | National Centre of Veterinary Diagn | Centers for Disease Control and Prevention                       |
| EPI425198 | PB1 | Vietnam    | 2011-Nov-22 | A/duck/Vietnam/NCVD129-7/2011     | National Centre of Veterinary Diagn | Centers for Disease Control and Prevention                       |
| EPI425190 | PB1 | Vietnam    | 2012-Feb-04 | A/chicken/Vietnam/NCVD-1189/2012  | National Centre of Veterinary Diagn | Centers for Disease Control and Prevention                       |
| EPI425166 | PB1 | Vietnam    | 2011-Mar-17 | A/chicken/Vietnam/NCVD-854/2011   | National Centre of Veterinary Diagn | Centers for Disease Control and Prevention                       |
| EPI425110 | PB1 | Vietnam    | 2012-Sep-06 | A/duck/Vietnam/NCVD-1943/2012     | National Centre of Veterinary Diagn | Centers for Disease Control and Prevention                       |
| EPI425062 | PB1 | Vietnam    | 2012-Feb-16 | A/duck/Vietnam/NCVD-1252/2011     | National Centre of Veterinary Diagn | Centers for Disease Control and Prevention                       |

Supplementary Table 1

|           |     |            |             |                                   |                                     |                                            |
|-----------|-----|------------|-------------|-----------------------------------|-------------------------------------|--------------------------------------------|
| EPI425054 | PB1 | Vietnam    | 2011-Mar-25 | A/duck/Vietnam/NCVD-760/2011      | National Centre of Veterinary Diagn | Centers for Disease Control and Prevention |
| EPI425046 | PB1 | Vietnam    | 2011-Mar-25 | A/duck/Vietnam/NCVD-759/2011      | National Centre of Veterinary Diagn | Centers for Disease Control and Prevention |
| EPI425038 | PB1 | Vietnam    | 2011-Mar-25 | A/duck/Vietnam/NCVD-758/2011      | National Centre of Veterinary Diagn | Centers for Disease Control and Prevention |
| EPI425030 | PB1 | Vietnam    | 2011-Apr-04 | A/duck/Vietnam/NCVD-754/2011      | National Centre of Veterinary Diagn | Centers for Disease Control and Prevention |
| EPI424934 | PB1 | Vietnam    | 2011-Apr-04 | A/chicken/Vietnam/NCVD-752/2011   | National Centre of Veterinary Diagn | Centers for Disease Control and Prevention |
| EPI424894 | PB1 | Vietnam    | 2011-Jul-15 | A/chicken/Vietnam/NCVD-921/2011   | National Centre of Veterinary Diagn | Centers for Disease Control and Prevention |
| EPI424886 | PB1 | Vietnam    | 2011-Jul-15 | A/duck/Vietnam/NCVD-920/2011      | National Centre of Veterinary Diagn | Centers for Disease Control and Prevention |
| EPI438913 | PB1 | Vietnam    | 2011-Sep-06 | A/duck/Vietnam/NCVD-1026/2011     | National Centre of Veterinary Diagn | Centers for Disease Control and Prevention |
| EPI424822 | PB1 | Vietnam    | 2011-Mar-28 | A/duck/Vietnam/NCVD-806/2011      | National Centre of Veterinary Diagn | Centers for Disease Control and Prevention |
| EPI424766 | PB1 | Vietnam    | 2011-Mar-12 | A/duck/Vietnam/NCVD-851/2011      | National Centre of Veterinary Diagn | Centers for Disease Control and Prevention |
| EPI424758 | PB1 | Vietnam    | 2012-Feb-20 | A/chicken/Vietnam/NCVD-1277/2012  | National Centre of Veterinary Diagn | Centers for Disease Control and Prevention |
| EPI424718 | PB1 | Vietnam    | 2012-Aug-23 | A/duck/Vietnam/NCVD-1897/2012     | National Centre of Veterinary Diagn | Centers for Disease Control and Prevention |
| EPI424662 | PB1 | Vietnam    | 2012-Feb-18 | A/chicken/Vietnam/NCVD-1255/2012  | National Centre of Veterinary Diagn | Centers for Disease Control and Prevention |
| EPI424424 | PB1 | Vietnam    | 2011-Feb-01 | A/chicken/Vietnam/NCVD-704/2011   | National Centre of Veterinary Diagn | Centers for Disease Control and Prevention |
| EPI424384 | PB1 | Vietnam    | 2011-Feb-01 | A/chicken/Vietnam/NCVD-685/2011   | National Centre of Veterinary Diagn | Centers for Disease Control and Prevention |
| EPI424376 | PB1 | Vietnam    | 2011-Feb-01 | A/duck/Vietnam/NCVD-680/2011      | National Centre of Veterinary Diagn | Centers for Disease Control and Prevention |
| EPI372526 | PB1 | Egypt      | 2004-Jan-28 | A/teal/Egypt/00677-NAMRU3/2004    | U.S. Naval Medical Research Unit N  | Centers for Disease Control and Prevention |
| EPI372494 | PB1 | Ukraine    | 2006-May-01 | A/pied avocet/Ukraine/05848-NAMRU | U.S. Naval Medical Research Unit N  | Centers for Disease Control and Prevention |
| EPI372456 | PB1 | Egypt      | 2007-Feb-09 | A/shoveler/Egypt/01574-NAMRU3/200 | U.S. Naval Medical Research Unit N  | Centers for Disease Control and Prevention |
| EPI372416 | PB1 | Egypt      | 2007-Jan-05 | A/shoveler/Egypt/00241-NAMRU3/200 | U.S. Naval Medical Research Unit N  | Centers for Disease Control and Prevention |
| EPI372345 | PB1 | Egypt      | 2005-Sep-10 | A/teal/Egypt/11974-NAMRU3/2005    | U.S. Naval Medical Research Unit N  | Centers for Disease Control and Prevention |
| EPI372337 | PB1 | Egypt      | 2004-Dec-18 | A/shoveler/Egypt/09781-NAMRU3/200 | U.S. Naval Medical Research Unit N  | Centers for Disease Control and Prevention |
| EPI372321 | PB1 | Egypt      | 2004-Dec-22 | A/shoveler/Egypt/09864-NAMRU3/200 | U.S. Naval Medical Research Unit N  | Centers for Disease Control and Prevention |
| EPI372273 | PB1 | Egypt      | 2003-Dec-22 | A/teal/Egypt/20431-NAMRU3/2003    | U.S. Naval Medical Research Unit N  | Centers for Disease Control and Prevention |
| EPI372265 | PB1 | Egypt      | 2003-Dec-15 | A/shoveler/Egypt/20313-NAMRU3/200 | U.S. Naval Medical Research Unit N  | Centers for Disease Control and Prevention |
| EPI448884 | PB1 | Bangladesh | 2011-Feb-07 | A/crow/Bangladesh/315T/2011       | Institute of Epidemiology Disease C | Centers for Disease Control and Prevention |
| EPI448905 | PB1 | Bangladesh | 2011-Jul-24 | A/duck/Bangladesh/4117T/2011      | Institute of Epidemiology Disease C | Centers for Disease Control and Prevention |
| EPI448919 | PB1 | Bangladesh | 2011-Feb-13 | A/crow/Bangladesh/1058/2011       | Institute of Epidemiology Disease C | Centers for Disease Control and Prevention |
| EPI348823 | PB1 | Vietnam    | 2010-Feb-25 | A/chicken/Vietnam/NCVD-428/2010   | National Institute of Hygiene and E | Centers for Disease Control and Prevention |
| EPI348816 | PB1 | Vietnam    | 2010-Feb-23 | A/chicken/Vietnam/NCVD-427/2010   | National Institute of Hygiene and E | Centers for Disease Control and Prevention |
| EPI466515 | PB1 | China      | 2013-Apr-05 | A/chicken/Jiangsu/TZXH/2013       | Yangzhou University                 | Chinese Academy of Sciences                |
| EPI466472 | PB1 | China      | 2013-Jan-07 | A/chicken/Jiangsu/NTTZ/2013       | Yangzhou University                 | Chinese Academy of Sciences                |
| EPI466424 | PB1 | China      | 2012-Mar-24 | A/chicken/Jiangsu/WJYBF/2012      | Yangzhou University                 | Chinese Academy of Sciences                |
| EPI466400 | PB1 | China      | 2012-Apr-16 | A/chicken/Jiangsu/XZLZG/2012      | Yangzhou University                 | Chinese Academy of Sciences                |

Supplementary Table 1

|           |     |           |             |                                          |                                       |                                                                  |
|-----------|-----|-----------|-------------|------------------------------------------|---------------------------------------|------------------------------------------------------------------|
| EPI466392 | PB1 | China     | 2011-May-11 | A/chicken/Jiangsu/YZ0511/2011            | Yangzhou University                   | Chinese Academy of Sciences                                      |
| EPI466384 | PB1 | China     | 2012-Mar-24 | A/chicken/Jiangsu/CZYWP/2012             | Yangzhou University                   | Chinese Academy of Sciences                                      |
| EPI466368 | PB1 | China     | 2011-Jun-11 | A/chicken/Jiangsu/YZ0611/2011            | Yangzhou University                   | Chinese Academy of Sciences                                      |
| EPI466352 | PB1 | China     | 2012-May-09 | A/chicken/Shangdong/SDWF29/2012          | Yangzhou University                   | Chinese Academy of Sciences                                      |
| EPI466280 | PB1 | China     | 2012-May-09 | A/chicken/Shangdong/SDWF14/2012          | Yangzhou University                   | Chinese Academy of Sciences                                      |
| EPI466272 | PB1 | China     | 2012-Mar-24 | A/chicken/Jiangsu/WJHRG/2012             | Yangzhou University                   | Chinese Academy of Sciences                                      |
| EPI464944 | PB1 | Italy     | 2012-Sep-28 | A/chicken/Italy/12VIR-7785-67/2012       | Istituto Zooprofilattico Sperimentale | Istituto Zooprofilattico Sperimentale Delle Veneziae             |
| EPI457787 | PB1 | China     | 2013-Apr-03 | A/chicken/Shanghai/S1358/2013            | Harbin Veterinary Research Institut   | Harbin Veterinary Research Institute                             |
| EPI457779 | PB1 | China     | 2013-Apr-03 | A/chicken/Shanghai/S1410/2013            | Harbin Veterinary Research Institut   | Harbin Veterinary Research Institute                             |
| EPI468350 | PB1 | China     | 2013-Apr-10 | A/chicken/Hangzhou/48-2/2013(H9N         | Hangzhou Center for Disease Contr     | Hangzhou Center for Disease Control and Prevention               |
| EPI397858 | PB1 | Australia | 2012-Jan-01 | A/Chicken/Queensland/1/2012              | Queensland Health Scientific Servic   | WHO Collaborating Centre for Reference and Research on Influenza |
| EPI355398 | PB1 | Egypt     | 2011-Jan-01 | A/chicken/Egypt/11vir4453-132/VRLCU/2011 |                                       | Istituto Zooprofilattico Sperimentale Delle Veneziae             |
| EPI355120 | PB1 | Egypt     | 2011-Mar-05 | A/chicken/Egypt/11vir4453-280/2011       | Istituto Zooprofilattico Sperimentale | Istituto Zooprofilattico Sperimentale Delle Veneziae             |
| EPI355104 | PB1 | Egypt     | 2011-Mar-05 | A/chicken/Egypt/11vir4453-275/2011       | Istituto Zooprofilattico Sperimentale | Istituto Zooprofilattico Sperimentale Delle Veneziae             |
| EPI241711 | PB1 | Denmark   | 2006-Mar-03 | A/peregrine/Denmark/6632/2006            | National Veterinary Institute         | Statens Serum Institute                                          |
| EPI244108 | PB1 | Germany   | 2009-Dec-01 | A/goose/Germany/R3160/09                 |                                       | Friedrich-Loeffler-Institut                                      |
| EPI241735 | PB1 | Denmark   | 2006-Mar-21 | A/grey lag goose/Denmark/6692/200        | National Veterinary Institute         | Statens Serum Institute                                          |
| EPI345434 | PB1 | Belgium   | 2010-Jan-27 | A/Larus argentatus/Belgium/02936cls      | Veterinary and Agrochemical Resea     | Veterinary and Agrochemical Research Institute                   |
| EPI345426 | PB1 | Belgium   | 2010-Jan-27 | A/Larus argentatus/Belgium/02936pc       | Veterinary and Agrochemical Resea     | Veterinary and Agrochemical Research Institute                   |
| EPI345418 | PB1 | Belgium   | 2008-Aug-18 | A/Larus argentatus/Belgium/14469-1       | Veterinary and Agrochemical Resea     | Veterinary and Agrochemical Research Institute                   |
| EPI345410 | PB1 | Belgium   | 2008-Aug-18 | A/Larus argentatus/Belgium/14469-2       | Veterinary and Agrochemical Resea     | Veterinary and Agrochemical Research Institute                   |
| EPI345402 | PB1 | Belgium   | 2008-Sep-25 | A/Larus argentatus/Belgium/17429-1       | Veterinary and Agrochemical Resea     | Veterinary and Agrochemical Research Institute                   |
| EPI345394 | PB1 | Belgium   | 2008-Sep-25 | A/Larus michahellis/Belgium/17429-3      | Veterinary and Agrochemical Resea     | Veterinary and Agrochemical Research Institute                   |
| EPI241766 | PB1 | Denmark   | 2006-Apr-03 | A/whooper swan/Denmark/7224/200          | National Veterinary Institute         | Statens Serum Institute                                          |
| EPI241662 | PB1 | Denmark   | 2006-Apr-05 | A/whooper swan/Denmark/7275/200          | National Veterinary Institute         | Statens Serum Institute                                          |
| EPI248475 | PB1 | Germany   | 2009-Jan-01 | A/turkey/Germany-NI/R778/09              |                                       | Friedrich-Loeffler-Institut                                      |
| EPI349052 | PB1 | Germany   | 2006-Jan-01 | A/Common Buzzard/Berlin/1/2006           | Robert Koch-Institute                 | Robert Koch-Institute                                            |
| EPI345386 | PB1 | Belgium   | 2010-Jan-27 | A/Arenaria interpres/Belgium/02936g      | Veterinary and Agrochemical Resea     | Veterinary and Agrochemical Research Institute                   |
| EPI345378 | PB1 | Belgium   | 2009-May-01 | A/Arenaria interpres/Belgium/06765c      | Veterinary and Agrochemical Resea     | Veterinary and Agrochemical Research Institute                   |
| EPI345370 | PB1 | Belgium   | 2008-Sep-15 | A/Arenaria interpres/Belgium/17044-      | Veterinary and Agrochemical Resea     | Veterinary and Agrochemical Research Institute                   |
| EPI294457 | PB1 | Poland    | 2008-Sep-03 | A/mallard/Poland/227/08                  | National Veterinary Research Instit   | National Veterinary Research Institute                           |
| EPI294444 | PB1 | Poland    | 2010-Aug-04 | A/mallard/Poland/96/10                   | National Veterinary Research Instit   | National Veterinary Research Institute                           |
| EPI293902 | PB1 | Turkey    | 2005-Dec-10 | A/Pigeon/Turkey-Agri/09rs2841-8/20       | Istituto Zooprofilattico Sperimentale | Istituto Zooprofilattico Sperimentale Delle Veneziae             |
| EPI293894 | PB1 | Turkey    | 2005-Dec-09 | A/Pigeon/Turkey-Kars/09rs2841-7/20       | Istituto Zooprofilattico Sperimentale | Istituto Zooprofilattico Sperimentale Delle Veneziae             |

Supplementary Table 1

|           |     |              |             |                                      |                                       |                                                                  |
|-----------|-----|--------------|-------------|--------------------------------------|---------------------------------------|------------------------------------------------------------------|
| EPI286986 | PB1 | Poland       | 2010-Aug-28 | A/common teal/Poland/180/2010 (H4    | National Veterinary Research Institut | National Veterinary Research Institute                           |
| EPI241671 | PB1 | Denmark      | 2006-May-16 | A/peacock/Denmark/60295/2006         | National Veterinary Institute         | Statens Serum Institute                                          |
| EPI241654 | PB1 | Denmark      | 2006-Apr-28 | A/great crested grebe/Denmark/7498   | Technical University of Denmark       | Statens Serum Institute                                          |
| EPI241646 | PB1 | Denmark      | 2006-Mar-15 | A/buzzard/Denmark/6370/2006          | National Veterinary Institute         | Statens Serum Institute                                          |
| EPI351602 | PB1 | Vietnam      | 2008-Jan-01 | A/civet/Vietnam/NCVD-004/2008        | National Centre of Veterinary Diagn   | Centers for Disease Control and Prevention                       |
| EPI295333 | PB1 | United State | 2009-Sep-04 | A/swine/South Dakota/152B/2009       | Emerging Pathogens Institute, Univ    | Centers for Disease Control and Prevention                       |
| EPI295322 | PB1 | United State | 2009-Aug-28 | A/swine/Minnesota/165A/2009          | Emerging Pathogens Institute, Univ    | Centers for Disease Control and Prevention                       |
| EPI295314 | PB1 | United State | 2009-Aug-31 | A/swine/Minnesota/136B/2009          | Emerging Pathogens Institute, Univ    | Centers for Disease Control and Prevention                       |
| EPI295306 | PB1 | United State | 2009-Sep-01 | A/swine/Minnesota/130A/2009          | Emerging Pathogens Institute, Univ    | Centers for Disease Control and Prevention                       |
| EPI295301 | PB1 | United State | 2009-Sep-01 | A/swine/Minnesota/130A/2009          | Emerging Pathogens Institute, Univ    | Centers for Disease Control and Prevention                       |
| EPI295294 | PB1 | United State | 2009-Aug-26 | A/swine/Minnesota/074A/2009          | Emerging Pathogens Institute, Univ    | Centers for Disease Control and Prevention                       |
| EPI295289 | PB1 | United State | 2009-Aug-26 | A/swine/Minnesota/074A/2009          | Emerging Pathogens Institute, Univ    | Centers for Disease Control and Prevention                       |
| EPI301671 | PB1 | Germany      | 2010-Jan-01 | A/swine/Germany-NI/R856/10           |                                       | Friedrich-Loeffler-Institut                                      |
| EPI411919 | PB1 | Germany      | 2010-Jan-01 | A/swine/Germany-NI/R757/10           |                                       | Friedrich-Loeffler-Institut                                      |
| EPI411881 | PB1 | Germany      | 2009-Jan-01 | A/swine/Germany-NI/R369/09           |                                       | Friedrich-Loeffler-Institut                                      |
| EPI411875 | PB1 | Germany      | 2009-Jan-01 | A/swine/Germany-NI/R299/09           |                                       | Friedrich-Loeffler-Institut                                      |
| EPI411869 | PB1 | Germany      | 2009-Jan-01 | A/swine/Germany-NI/R248/09           |                                       | Friedrich-Loeffler-Institut                                      |
| EPI253905 | PB1 | Italy        | 2000-Jan-03 | A/swine/Italy/18/2000                |                                       | Istituto Zooprofilattico Sperimentale della Lombardia e dell'Emi |
| EPI248491 | PB1 | Germany      | 2009-Jan-01 | A/swine/Germany-BB/siv-leipz11308/09 |                                       | Friedrich-Loeffler-Institut                                      |
| EPI248483 | PB1 | Germany      | 2009-Jan-01 | A/swine/Germany-SH/R1737/09          |                                       | Friedrich-Loeffler-Institut                                      |
| EPI280278 | PB1 | China        | 2009-Jan-16 | A/water/Hunan/7/2009                 | WHO Chinese National Influenza Ce     | WHO Chinese National Influenza Center                            |
| EPI280270 | PB1 | China        | 2009-Jan-16 | A/water/Hunan/3/2009                 | WHO Chinese National Influenza Ce     | WHO Chinese National Influenza Center                            |
| EPI280262 | PB1 | China        | 2009-Jan-16 | A/environment/Xinjiang/6/2009        | WHO Chinese National Influenza Ce     | WHO Chinese National Influenza Center                            |
| EPI280246 | PB1 | China        | 2009-Jan-16 | A/environment/Guizhou/9/2009         | WHO Chinese National Influenza Ce     | WHO Chinese National Influenza Center                            |
| EPI280238 | PB1 | China        | 2009-Jan-16 | A/environment/Guizhou/7/2009         | WHO Chinese National Influenza Ce     | WHO Chinese National Influenza Center                            |
| EPI280230 | PB1 | China        | 2009-Jan-16 | A/environment/Guizhou/4/2009         | WHO Chinese National Influenza Ce     | WHO Chinese National Influenza Center                            |
| EPI280222 | PB1 | China        | 2009-Jan-16 | A/environment/Guizhou/2/2009         | WHO Chinese National Influenza Ce     | WHO Chinese National Influenza Center                            |
| EPI280214 | PB1 | China        | 2009-Jan-06 | A/duck feces/Hebei/5/2009            | WHO Chinese National Influenza Ce     | WHO Chinese National Influenza Center                            |
| EPI280206 | PB1 | China        | 2009-Jan-06 | A/water/Hebei/3/2009                 | WHO Chinese National Influenza Ce     | WHO Chinese National Influenza Center                            |
| EPI280198 | PB1 | China        | 2009-Jan-06 | A/water/Hebei/2/2009                 | WHO Chinese National Influenza Ce     | WHO Chinese National Influenza Center                            |
| EPI280190 | PB1 | China        | 2009-Jan-06 | A/water/Hebei/1/2009                 | WHO Chinese National Influenza Ce     | WHO Chinese National Influenza Center                            |
| EPI338345 | PB1 | Germany      | 2009-Jan-01 | A/hen's egg/Germany/[A/cygnus cygr   | Friedrich-Loeffler-Institut           | Friedrich-Loeffler-Institut                                      |
| EPI338337 | PB1 | Germany      | 2009-Jan-01 | A/hen's egg/Germany/[A/cygnus cygr   | Friedrich-Loeffler-Institut           | Friedrich-Loeffler-Institut                                      |
| EPI328747 | PB1 | United State | 2010-Jan-01 | A/South Carolina/02/2010 NYMC X-205A |                                       | Centers for Disease Control and Prevention                       |

Supplementary Table 1

|           |     |               |             |                                    |                                                                  |                                                                  |
|-----------|-----|---------------|-------------|------------------------------------|------------------------------------------------------------------|------------------------------------------------------------------|
| EPI325050 | PB1 | Australia     | 2010-Jan-01 | A/Perth/10/2010 X-207              |                                                                  | Centers for Disease Control and Prevention                       |
| EPI309748 | PB1 | Germany       | 2008-Jan-01 | A/cygnus cygnus/Germany/R65.1/2008 | Friedrich-Loeffler-Institut                                      | Friedrich-Loeffler-Institut                                      |
| EPI287338 | PB1 | Germany       | 2009-Jan-01 | A/MDCK/Germany/[A/cygnus cygnus]   | Friedrich-Loeffler-Institut                                      | Friedrich-Loeffler-Institut                                      |
| EPI287330 | PB1 | Germany       | 2009-Jan-01 | A/MDCK/Germany/[A/cygnus cygnus]   | Friedrich-Loeffler-Institut                                      | Friedrich-Loeffler-Institut                                      |
| EPI287322 | PB1 | Germany       | 2009-Jan-01 | A/MDCK/Germany/[A/cygnus cygnus]   | Friedrich-Loeffler-Institut                                      | Friedrich-Loeffler-Institut                                      |
| EPI287314 | PB1 | Germany       | 2009-Jan-01 | A/MDCK/Germany/[A/cygnus cygnus]   | Friedrich-Loeffler-Institut                                      | Friedrich-Loeffler-Institut                                      |
| EPI287306 | PB1 | Germany       | 2009-Jan-01 | A/MDCK/Germany/[A/cygnus cygnus]   | Friedrich-Loeffler-Institut                                      | Friedrich-Loeffler-Institut                                      |
| EPI287298 | PB1 | Germany       | 2009-Jan-01 | A/MDCK/Germany/[A/cygnus cygnus]   | Friedrich-Loeffler-Institut                                      | Friedrich-Loeffler-Institut                                      |
| EPI287290 | PB1 | Germany       | 2009-Jan-01 | A/MDCK/Germany/[A/cygnus cygnus]   | Friedrich-Loeffler-Institut                                      | Friedrich-Loeffler-Institut                                      |
| EPI287282 | PB1 | Germany       | 2009-Jan-01 | A/MDCK/Germany/[A/cygnus cygnus]   | Friedrich-Loeffler-Institut                                      | Friedrich-Loeffler-Institut                                      |
| EPI287274 | PB1 | Germany       | 2008-Jan-01 | A/MDCK/Germany/[A/cygnus cygnus]   | Friedrich-Loeffler-Institut                                      | Friedrich-Loeffler-Institut                                      |
| EPI287266 | PB1 | Germany       | 2009-Jan-01 | A/MDCK/Germany/[A/cygnus cygnus]   | Friedrich-Loeffler-Institut                                      | Friedrich-Loeffler-Institut                                      |
| EPI287258 | PB1 | Germany       | 2009-Jan-01 | A/MDCK/Germany/[A/cygnus cygnus]   | Friedrich-Loeffler-Institut                                      | Friedrich-Loeffler-Institut                                      |
| EPI287250 | PB1 | Germany       | 2009-Jan-01 | A/MDCK/Germany/[A/cygnus cygnus]   | Friedrich-Loeffler-Institut                                      | Friedrich-Loeffler-Institut                                      |
| EPI287242 | PB1 | Germany       | 2009-Jan-01 | A/MDCK/Germany/[A/cygnus cygnus]   | Friedrich-Loeffler-Institut                                      | Friedrich-Loeffler-Institut                                      |
| EPI287234 | PB1 | Germany       | 2009-Jan-01 | A/MDCK/Germany/[A/cygnus cygnus]   | Friedrich-Loeffler-Institut                                      | Friedrich-Loeffler-Institut                                      |
| EPI287226 | PB1 | Germany       | 2008-Jan-01 | A/MDCK/Germany/[A/cygnus cygnus]   | Friedrich-Loeffler-Institut                                      | Friedrich-Loeffler-Institut                                      |
| EPI287210 | PB1 | Germany       | 2008-Jan-01 | A/MDCK/Germany/[A/cygnus cygnus]   | Friedrich-Loeffler-Institut                                      | Friedrich-Loeffler-Institut                                      |
| EPI254624 | PB1 | Australia     | 2009-Jan-01 | IVR-155(A/Victoria/210/2009)       |                                                                  | Centers for Disease Control and Prevention                       |
| EPI239902 | PB1 | United States | 2009-Apr-09 | A/California/07/2009 X-181A        |                                                                  | Centers for Disease Control and Prevention                       |
| EPI239899 | PB1 | United States | 2009-Apr-09 | A/California/07/2009 X-181         |                                                                  | Centers for Disease Control and Prevention                       |
| EPI353527 | PB1 | United States | 2009-Jan-01 | A/Wisconsin/15/2009 X-183          | New York Medical College                                         | Centers for Disease Control and Prevention                       |
| EPI347089 | PB1 | Australia     | 2011-Feb-18 | A/Brisbane/70/2011                 | WHO Collaborating Centre for Reference and Research on Influenza | Centers for Disease Control and Prevention                       |
| EPI347096 | PB1 | Thailand      | 2011-Jun-08 | A/Nonthaburi/78/2011               | WHO National Influenza Centre, Nonthaburi                        | Centers for Disease Control and Prevention                       |
| EPI346499 | PB1 | United States | 2011-Nov-04 | A/Minnesota/19/2011                | Minnesota Department of Health                                   | Centers for Disease Control and Prevention                       |
| EPI346491 | PB1 | United States | 2011-Nov-21 | A/West Virginia/06/2011            | West Virginia Office of Laboratory Medicine                      | Centers for Disease Control and Prevention                       |
| EPI346438 | PB1 | United States | 2011-Nov-14 | A/Iowa/08/2011                     | Iowa State Hygienic Laboratory                                   | Centers for Disease Control and Prevention                       |
| EPI346430 | PB1 | United States | 2011-Nov-14 | A/Iowa/07/2011                     | Iowa State Hygienic Laboratory                                   | Centers for Disease Control and Prevention                       |
| EPI346422 | PB1 | United States | 2011-Nov-14 | A/Iowa/09/2011                     | Iowa State Hygienic Laboratory                                   | Centers for Disease Control and Prevention                       |
| EPI370188 | PB1 | Australia     | 2011-Sep-20 | A/VICTORIA/103/2011                | Victorian Infectious Diseases Reference Laboratory               | WHO Collaborating Centre for Reference and Research on Influenza |
| EPI346282 | PB1 | Singapore     | 2011-May-16 | A/SINGAPORE/41/2011                | National Public Health Laboratory                                | WHO Collaborating Centre for Reference and Research on Influenza |
| EPI344403 | PB1 | United States | 2011-Jul-27 | A/Indiana/08/2011                  | Indiana State Department of Health                               | Centers for Disease Control and Prevention                       |
| EPI344395 | PB1 | United States | 2011-Oct-22 | A/Indiana/10/2011                  | Indiana State Department of Health                               | Centers for Disease Control and Prevention                       |
| EPI344387 | PB1 | United States | 2011-Oct-22 | A/Indiana/10/2011                  | Indiana State Department of Health                               | Centers for Disease Control and Prevention                       |

Supplementary Table 1

|           |     |               |             |                                     |                                                                  |                                                                  |
|-----------|-----|---------------|-------------|-------------------------------------|------------------------------------------------------------------|------------------------------------------------------------------|
| EPI342702 | PB1 | United States | 2011-Nov-14 | A/Iowa/09/2011                      | Iowa State Hygienic Laboratory                                   | Centers for Disease Control and Prevention                       |
| EPI342694 | PB1 | United States | 2011-Nov-14 | A/Iowa/08/2011                      | Iowa State Hygienic Laboratory                                   | Centers for Disease Control and Prevention                       |
| EPI342686 | PB1 | United States | 2011-Nov-14 | A/Iowa/07/2011                      | Iowa State Hygienic Laboratory                                   | Centers for Disease Control and Prevention                       |
| EPI342432 | PB1 | United States | 2010-Nov-01 | A/Kentucky/09/2010                  | Kentucky Division of Laboratory Services                         | Centers for Disease Control and Prevention                       |
| EPI341663 | PB1 | China         | 2009-Jun-01 | A/Guangdong-Luohu/1256/2009         | WHO Chinese National Influenza Center                            | Centers for Disease Control and Prevention                       |
| EPI377958 | PB1 | Indonesia     | 2011-Oct-07 | A/Indonesia/NIHRD11771/2011(H5N1)   | National Institute of Health Research and Development            | National Institute of Health Research and Development            |
| EPI377952 | PB1 | Indonesia     | 2011-Oct-07 | A/Indonesia/NIHRD11767/2011(H5N1)   | National Institute of Health Research and Development            | National Institute of Health Research and Development            |
| EPI339169 | PB1 | United States | 2011-Oct-10 | A/Maine/06/2011                     | Maine Health and Environmental Services                          | Centers for Disease Control and Prevention                       |
| EPI340943 | PB1 | Australia     | 2011-Jun-10 | A/South Australia/03/2011           | WHO Collaborating Centre for Reference and Research on Influenza | Centers for Disease Control and Prevention                       |
| EPI335921 | PB1 | United States | 2010-Dec-30 | A/Iowa/19/2010                      | Iowa State Hygienic Laboratory                                   | Centers for Disease Control and Prevention                       |
| EPI367553 | PB1 | Bangladesh    | 2011-May-19 | A/Bangladesh/5071/2011              | Institute of Epidemiology Disease Control and Prevention         | Centers for Disease Control and Prevention                       |
| EPI335627 | PB1 | United States | 2011-Jul-27 | A/Indiana/08/2011                   | Indiana State Department of Health                               | Centers for Disease Control and Prevention                       |
| EPI335608 | PB1 | United States | 2011-Aug-20 | A/Pennsylvania/09/2011              | Pennsylvania Department of Health                                | Centers for Disease Control and Prevention                       |
| EPI465442 | PB1 | Australia     | 2011-Jul-11 | A/NEWCASTLE/163/2011                | John Hunter Hospital, Virology Unit                              | WHO Collaborating Centre for Reference and Research on Influenza |
| EPI465430 | PB1 | Australia     | 2011-Jul-04 | A/NEWCASTLE/85/2011                 | John Hunter Hospital, Virology Unit                              | WHO Collaborating Centre for Reference and Research on Influenza |
| EPI465436 | PB1 | Australia     | 2011-Jun-20 | A/NEWCASTLE/17/2011                 | John Hunter Hospital, Virology Unit                              | WHO Collaborating Centre for Reference and Research on Influenza |
| EPI333150 | PB1 | United States | 2011-Jul-27 | A/Indiana/08/2011                   | Indiana State Department of Health                               | Centers for Disease Control and Prevention                       |
| EPI465425 | PB1 | Australia     | 2011-Jul-02 | A/NEWCASTLE/58/2011                 | John Hunter Hospital, Virology Unit                              | WHO Collaborating Centre for Reference and Research on Influenza |
| EPI349319 | PB1 | Australia     | 2011-Jun-23 | A/NEWCASTLE/47/2011                 | John Hunter Hospital, Virology Unit                              | WHO Collaborating Centre for Reference and Research on Influenza |
| EPI332644 | PB1 | Australia     | 2011-Jan-26 | A/BRISBANE/15/2011                  | Queensland Health Scientific Services                            | WHO Collaborating Centre for Reference and Research on Influenza |
| EPI332625 | PB1 | Nauru         | 2011-Jan-21 | A/NAURU/5/2011                      | Republic of Nauru Hospital                                       | WHO Collaborating Centre for Reference and Research on Influenza |
| EPI332686 | PB1 | Australia     | 2011-Mar-01 | A/PERTH/30/2011                     | Pathwest QE II Medical Centre                                    | WHO Collaborating Centre for Reference and Research on Influenza |
| EPI331663 | PB1 | Australia     | 2010-Dec-16 | A/TOWNSVILLE/117/2010               | Queensland Health Scientific Services                            | WHO Collaborating Centre for Reference and Research on Influenza |
| EPI349314 | PB1 | Australia     | 2011-May-09 | A/TASMANIA/16/2011                  | Royal Hobart Hospital                                            | WHO Collaborating Centre for Reference and Research on Influenza |
| EPI332654 | PB1 | Australia     | 2011-Feb-13 | A/TASMANIA/2/2011                   | Royal Hobart Hospital                                            | WHO Collaborating Centre for Reference and Research on Influenza |
| EPI331292 | PB1 | Australia     | 2011-Jan-21 | A/VICTORIA/508/2011                 | Monash Medical Centre                                            | WHO Collaborating Centre for Reference and Research on Influenza |
| EPI331281 | PB1 | Australia     | 2011-Jan-15 | A/VICTORIA/506/2011                 | Monash Medical Centre                                            | WHO Collaborating Centre for Reference and Research on Influenza |
| EPI332604 | PB1 | United States | 2011-Mar-30 | A/Michigan/03/2011                  | Michigan Department of Community Health                          | Centers for Disease Control and Prevention                       |
| EPI330985 | PB1 | United States | 2011-Mar-13 | A/California/21/2011                | California Department of Health Services                         | Centers for Disease Control and Prevention                       |
| EPI332590 | PB1 | United States | 2011-Feb-21 | A/California/20/2011                | California Department of Health Services                         | Centers for Disease Control and Prevention                       |
| EPI330863 | PB1 | China         | 2011-May-12 | A/Hunan-Jishou/SWL1124/2011         | WHO Chinese National Influenza Center                            | WHO Chinese National Influenza Center                            |
| EPI330855 | PB1 | China         | 2011-Apr-02 | A/Fujian-Xinluo/SWL1141/2011        | WHO Chinese National Influenza Center                            | WHO Chinese National Influenza Center                            |
| EPI330847 | PB1 | China         | 2011-Apr-08 | A/Heilongjiang-Longsha/SWL1181/2011 | WHO Chinese National Influenza Center                            | WHO Chinese National Influenza Center                            |
| EPI330783 | PB1 | China         | 2011-May-10 | A/Shanghai-Fengxian/1170/2011       | WHO Chinese National Influenza Center                            | WHO Chinese National Influenza Center                            |

Supplementary Table 1

|           |     |       |             |                                    |                                   |                                       |
|-----------|-----|-------|-------------|------------------------------------|-----------------------------------|---------------------------------------|
| EPI330775 | PB1 | China | 2011-Apr-28 | A/Hunan-Wuling/1304/2011           | WHO Chinese National Influenza Ce | WHO Chinese National Influenza Center |
| EPI330767 | PB1 | China | 2011-Apr-15 | A/Heilongjiang-Taoshan/147/2011    | WHO Chinese National Influenza Ce | WHO Chinese National Influenza Center |
| EPI330759 | PB1 | China | 2011-Apr-14 | A/Hunan-Yanfeng/165/2011           | WHO Chinese National Influenza Ce | WHO Chinese National Influenza Center |
| EPI330751 | PB1 | China | 2011-Mar-11 | A/Hunan-Beihu/1143/2011            | WHO Chinese National Influenza Ce | WHO Chinese National Influenza Center |
| EPI330695 | PB1 | China | 2011-Apr-29 | A/Hunan-Jishou/SWL1116/2011        | WHO Chinese National Influenza Ce | WHO Chinese National Influenza Center |
| EPI330687 | PB1 | China | 2011-Apr-01 | A/Shandong-Zhifu/SWL1200/2011      | WHO Chinese National Influenza Ce | WHO Chinese National Influenza Center |
| EPI330679 | PB1 | China | 2011-Feb-20 | A/Zhejiang/SWL throat swab4/2011   | WHO Chinese National Influenza Ce | WHO Chinese National Influenza Center |
| EPI330671 | PB1 | China | 2011-Mar-04 | A/Heilongjiang-Xiangfang/SWL1528/2 | WHO Chinese National Influenza Ce | WHO Chinese National Influenza Center |
| EPI330663 | PB1 | China | 2011-Apr-02 | A/Hebei-Yuhua/SWL1187/2011         | WHO Chinese National Influenza Ce | WHO Chinese National Influenza Center |
| EPI330575 | PB1 | China | 2011-Mar-28 | A/Liaoning-Tiedong/1153/2011       | WHO Chinese National Influenza Ce | WHO Chinese National Influenza Center |
| EPI330567 | PB1 | China | 2011-Mar-22 | A/Liaoning-Haizhou/1118/2011       | WHO Chinese National Influenza Ce | WHO Chinese National Influenza Center |
| EPI330559 | PB1 | China | 2011-Mar-08 | A/Heilongjiang-Nangang/124/2011    | WHO Chinese National Influenza Ce | WHO Chinese National Influenza Center |
| EPI330551 | PB1 | China | 2011-Feb-15 | A/Tianjin-Hedong/195/2011          | WHO Chinese National Influenza Ce | WHO Chinese National Influenza Center |
| EPI330535 | PB1 | China | 2011-Mar-03 | A/Jilin-Chuanying/1156/2011        | WHO Chinese National Influenza Ce | WHO Chinese National Influenza Center |
| EPI330527 | PB1 | China | 2011-Mar-17 | A/Heilongjiang-Xiangyang/1134/2011 | WHO Chinese National Influenza Ce | WHO Chinese National Influenza Center |
| EPI330519 | PB1 | China | 2011-Mar-09 | A/Heilongjiang-Xiangyang/1125/2011 | WHO Chinese National Influenza Ce | WHO Chinese National Influenza Center |
| EPI330511 | PB1 | China | 2011-Feb-14 | A/Shanghai-Luwan/188/2011          | WHO Chinese National Influenza Ce | WHO Chinese National Influenza Center |
| EPI330354 | PB1 | China | 2011-Feb-15 | A/Fujian-Gulou/SWL1103/2011        | WHO Chinese National Influenza Ce | WHO Chinese National Influenza Center |
| EPI330346 | PB1 | China | 2011-Feb-10 | A/Hunan-Yuhua/SWL173/2011          | WHO Chinese National Influenza Ce | WHO Chinese National Influenza Center |
| EPI330338 | PB1 | China | 2011-Feb-20 | A/Hunan-Yueyanglou/SWL143/2011     | WHO Chinese National Influenza Ce | WHO Chinese National Influenza Center |
| EPI330330 | PB1 | China | 2011-Mar-07 | A/Guangdong-Xinxing/SWL198/2011    | WHO Chinese National Influenza Ce | WHO Chinese National Influenza Center |
| EPI330322 | PB1 | China | 2011-Mar-14 | A/Gansu-Chengguan/SWL579/2011      | WHO Chinese National Influenza Ce | WHO Chinese National Influenza Center |
| EPI330306 | PB1 | China | 2011-Mar-01 | A/Shanghai-Jingan/SWL1230/2011     | WHO Chinese National Influenza Ce | WHO Chinese National Influenza Center |
| EPI330298 | PB1 | China | 2011-Mar-03 | A/Heilongjiang-Xiangyang/SWL196/20 | WHO Chinese National Influenza Ce | WHO Chinese National Influenza Center |
| EPI330290 | PB1 | China | 2011-Feb-04 | A/Sichuan-Chuanshan/SWL118/2011    | WHO Chinese National Influenza Ce | WHO Chinese National Influenza Center |
| EPI330282 | PB1 | China | 2011-Mar-02 | A/Jiangsu-Xinpu/SWL187/2011        | WHO Chinese National Influenza Ce | WHO Chinese National Influenza Center |
| EPI330274 | PB1 | China | 2011-Mar-07 | A/Hunan-Xiangtan/SWL141/2011       | WHO Chinese National Influenza Ce | WHO Chinese National Influenza Center |
| EPI330210 | PB1 | China | 2011-Feb-13 | A/Jiangxi/SWL throat swab1/2011    | WHO Chinese National Influenza Ce | WHO Chinese National Influenza Center |
| EPI330202 | PB1 | China | 2011-Feb-21 | A/Hunan/SWL throat swab9/2011      | WHO Chinese National Influenza Ce | WHO Chinese National Influenza Center |
| EPI330194 | PB1 | China | 2011-Feb-15 | A/Chongqing/SWL throat swab1/2011  | WHO Chinese National Influenza Ce | WHO Chinese National Influenza Center |
| EPI330178 | PB1 | China | 2011-Feb-02 | A/Beijing-Xicheng/SWL1261/2011     | WHO Chinese National Influenza Ce | WHO Chinese National Influenza Center |
| EPI330170 | PB1 | China | 2011-Feb-15 | A/Chongqing-Wanzhou/SWL53/2011     | WHO Chinese National Influenza Ce | WHO Chinese National Influenza Center |
| EPI330162 | PB1 | China | 2011-Feb-10 | A/Hunan/SWL throat swab2/2011      | WHO Chinese National Influenza Ce | WHO Chinese National Influenza Center |
| EPI330106 | PB1 | China | 2011-Feb-22 | A/Beijing-Xicheng/1409/2011        | WHO Chinese National Influenza Ce | WHO Chinese National Influenza Center |

Supplementary Table 1

|           |     |              |             |                                |                                      |                                                                  |
|-----------|-----|--------------|-------------|--------------------------------|--------------------------------------|------------------------------------------------------------------|
| EPI330098 | PB1 | China        | 2011-Feb-08 | A/Beijing-Xicheng/1293/2011    | WHO Chinese National Influenza Ce    | WHO Chinese National Influenza Center                            |
| EPI330082 | PB1 | China        | 2011-Feb-10 | A/Beijing-Dongcheng/SWL51/2011 | WHO Chinese National Influenza Ce    | WHO Chinese National Influenza Center                            |
| EPI330074 | PB1 | China        | 2011-Feb-05 | A/Hunan-Furong/SWL410/2011     | WHO Chinese National Influenza Ce    | WHO Chinese National Influenza Center                            |
| EPI326270 | PB1 | United State | 2011-Jan-16 | A/California/16/2011           | California Department of Health Se   | Centers for Disease Control and Prevention                       |
| EPI325034 | PB1 | United State | 2011-Apr-15 | A/Wisconsin/22/2011            | Wisconsin State Laboratory of Hygi   | Centers for Disease Control and Prevention                       |
| EPI320127 | PB1 | United State | 2011-Feb-28 | A/Pennsylvania/07/2011         | Pennsylvania Department of Health    | Centers for Disease Control and Prevention                       |
| EPI320119 | PB1 | United State | 2011-Feb-22 | A/Pennsylvania/02/2011         | Pennsylvania Department of Health    | Centers for Disease Control and Prevention                       |
| EPI320110 | PB1 | United State | 2010-Dec-09 | A/New York/14/2010             | New York City Department of Health   | Centers for Disease Control and Prevention                       |
| EPI320091 | PB1 | United State | 2011-Feb-21 | A/New Mexico/06/2011           | New Mexico Department of Health      | Centers for Disease Control and Prevention                       |
| EPI320083 | PB1 | United State | 2011-Feb-09 | A/New Mexico/05/2011           | New Mexico Department of Health      | Centers for Disease Control and Prevention                       |
| EPI320061 | PB1 | United State | 2011-Feb-18 | A/Minnesota/03/2011            | Minnesota Department of Health       | Centers for Disease Control and Prevention                       |
| EPI320053 | PB1 | United State | 2011-Feb-18 | A/Minnesota/03/2011            | Minnesota Department of Health       | Centers for Disease Control and Prevention                       |
| EPI326319 | PB1 | United State | 2011-Jan-27 | A/North Carolina/05/2011       | North Carolina State Laboratory of   | Centers for Disease Control and Prevention                       |
| EPI319693 | PB1 | United State | 2011-Jan-22 | A/Illinois/04/2011             | Illinois Department of Public Health | Centers for Disease Control and Prevention                       |
| EPI319640 | PB1 | United State | 2011-Mar-01 | A/Alaska/15/2011               | Alaska State Virology Lab            | Centers for Disease Control and Prevention                       |
| EPI319575 | PB1 | Singapore    | 2010-Dec-15 | A/Singapore/640/2010           | National Public Health Laboratory    | WHO Collaborating Centre for Reference and Research on Influenza |
| EPI332653 | PB1 | Brunei       | 2011-Jan-13 | A/Brunei/1/2011                | Qasya Diagnostic Services Sdn Bhd    | WHO Collaborating Centre for Reference and Research on Influenza |
| EPI319583 | PB1 | Australia    | 2011-Mar-08 | A/Perth/29/2011                | Pathwest QE II Medical Centre        | WHO Collaborating Centre for Reference and Research on Influenza |
| EPI332703 | PB1 | Australia    | 2011-Jan-13 | A/DARWIN/2/2011                | Influenza Surveillance Centre for Di | WHO Collaborating Centre for Reference and Research on Influenza |
| EPI316497 | PB1 | United State | 2011-Feb-06 | A/Wisconsin/18/2011            | Wisconsin State Laboratory of Hygi   | Centers for Disease Control and Prevention                       |
| EPI316488 | PB1 | United State | 2011-Jan-15 | A/Wisconsin/16/2011            | Wisconsin State Laboratory of Hygi   | Centers for Disease Control and Prevention                       |
| EPI316481 | PB1 | United State | 2011-Feb-14 | A/Wisconsin/15/2011            | Wisconsin State Laboratory of Hygi   | Centers for Disease Control and Prevention                       |
| EPI320165 | PB1 | Russian Fed  | 2011-Mar-14 | A/Voronezh/1/2011              | Russian Academy of Medical Scienc    | Centers for Disease Control and Prevention                       |
| EPI320152 | PB1 | United State | 2011-Mar-01 | A/Texas/09/2011                | Texas Childrens Hospital             | Centers for Disease Control and Prevention                       |
| EPI316433 | PB1 | Russian Fed  | 2011-Mar-14 | A/St. Petersburg/100/2011      | Russian Academy of Medical Scienc    | Centers for Disease Control and Prevention                       |
| EPI316411 | PB1 | United State | 2011-Jan-20 | A/North Carolina/09/2011       | North Carolina State Laboratory of   | Centers for Disease Control and Prevention                       |
| EPI316406 | PB1 | United State | 2011-Mar-01 | A/North Carolina/08/2011       | North Carolina State Laboratory of   | Centers for Disease Control and Prevention                       |
| EPI320113 | PB1 | United State | 2011-Jan-15 | A/North Carolina/07/2011       | North Carolina State Laboratory of   | Centers for Disease Control and Prevention                       |
| EPI316393 | PB1 | United State | 2011-Jan-20 | A/North Carolina/06/2011       | North Carolina State Laboratory of   | Centers for Disease Control and Prevention                       |
| EPI320002 | PB1 | United State | 2011-Feb-15 | A/California/17/2011           | Naval Health Research Center         | Centers for Disease Control and Prevention                       |
| EPI316199 | PB1 | United State | 2011-Feb-05 | A/Texas/06/2011                | Dallas County Health and Human S     | Centers for Disease Control and Prevention                       |
| EPI312979 | PB1 | United State | 2010-Sep-13 | A/Pennsylvania/40/2010         | Pennsylvania Department of Health    | Centers for Disease Control and Prevention                       |
| EPI342466 | PB1 | United State | 2011-Jan-05 | A/Washington/02/2011           | Washington State Public Health La    | Centers for Disease Control and Prevention                       |
| EPI310156 | PB1 | United State | 2011-Jan-06 | A/Virginia/04/2011             | New York State Department of Hea     | Centers for Disease Control and Prevention                       |



Supplementary Table 1

|           |     |                |             |                          |                                                     |                                                                  |
|-----------|-----|----------------|-------------|--------------------------|-----------------------------------------------------|------------------------------------------------------------------|
| EPI310147 | PB1 | United States  | 2011-Feb-15 | A/Virginia/01/2011       | Virginia Division of Consolidated Laboratories      | Centers for Disease Control and Prevention                       |
| EPI342456 | PB1 | United States  | 2011-Feb-22 | A/Pennsylvania/02/2011   | Pennsylvania Department of Health                   | Centers for Disease Control and Prevention                       |
| EPI310064 | PB1 | United States  | 2011-Jan-27 | A/North Carolina/02/2011 | North Carolina State Laboratory of Health           | Centers for Disease Control and Prevention                       |
| EPI310021 | PB1 | United States  | 2011-Feb-18 | A/Minnesota/03/2011      | Minnesota Department of Health                      | Centers for Disease Control and Prevention                       |
| EPI309994 | PB1 | United States  | 2011-Mar-02 | A/Maryland/08/2011       | Maryland Department of Health and General Services  | Centers for Disease Control and Prevention                       |
| EPI309988 | PB1 | United States  | 2011-Feb-25 | A/Maryland/07/2011       | Maryland Department of Health and General Services  | Centers for Disease Control and Prevention                       |
| EPI309982 | PB1 | United States  | 2011-Feb-22 | A/Maryland/06/2011       | Maryland Department of Health and General Services  | Centers for Disease Control and Prevention                       |
| EPI309975 | PB1 | United States  | 2011-Jan-24 | A/Maryland/05/2011       | Maryland Department of Health and General Services  | Centers for Disease Control and Prevention                       |
| EPI309968 | PB1 | United States  | 2011-Feb-02 | A/Maryland/04/2011       | Maryland Department of Health and General Services  | Centers for Disease Control and Prevention                       |
| EPI309960 | PB1 | United States  | 2011-Jan-10 | A/Maryland/03/2011       | Maryland Department of Health and General Services  | Centers for Disease Control and Prevention                       |
| EPI309952 | PB1 | United States  | 2011-Feb-17 | A/Maine/04/2011          | Maine Health and Environmental Services             | Centers for Disease Control and Prevention                       |
| EPI316357 | PB1 | United States  | 2011-Jan-19 | A/Indiana/04/2011        | Indiana State Department of Health                  | Centers for Disease Control and Prevention                       |
| EPI309875 | PB1 | United States  | 2011-Feb-12 | A/Delaware/08/2011       | New York State Department of Health                 | Centers for Disease Control and Prevention                       |
| EPI316344 | PB1 | United States  | 2011-Jan-01 | A/Delaware/07/2011       |                                                     | Centers for Disease Control and Prevention                       |
| EPI309863 | PB1 | United States  | 2011-Feb-04 | A/Delaware/06/2011       | New York State Department of Health                 | Centers for Disease Control and Prevention                       |
| EPI309855 | PB1 | United States  | 2011-Feb-04 | A/Delaware/04/2011       | New York State Department of Health                 | Centers for Disease Control and Prevention                       |
| EPI309835 | PB1 | United States  | 2010-Dec-29 | A/Colorado/11/2010       | Colorado Department of Health and Human Services    | Centers for Disease Control and Prevention                       |
| EPI309824 | PB1 | United States  | 2011-Jan-07 | A/California/14/2011     | California Department of Health Services            | Centers for Disease Control and Prevention                       |
| EPI316157 | PB1 | Canada         | 2011-Jan-02 | A/Ontario/RV0064/2011    | National Microbiology Laboratory, Health Canada     | Centers for Disease Control and Prevention                       |
| EPI319675 | PB1 | United States  | 2011-Feb-10 | A/Georgia/01/2011        |                                                     | Centers for Disease Control and Prevention                       |
| EPI309553 | PB1 | United States  | 2011-Jan-11 | A/New Jersey/01/2011     | New Jersey Department of Health and Senior Services | Centers for Disease Control and Prevention                       |
| EPI331235 | PB1 | United States  | 2010-Dec-31 | A/Massachusetts/06/2010  | Massachusetts Department of Public Health           | Centers for Disease Control and Prevention                       |
| EPI316201 | PB1 | United States  | 2010-Dec-31 | A/Texas/24/2010          | Dallas County Health and Human Services             | Centers for Disease Control and Prevention                       |
| EPI319850 | PB1 | United States  | 2010-Dec-21 | A/Wyoming/09/2010        | Wyoming Public Health Laboratory                    | Centers for Disease Control and Prevention                       |
| EPI353299 | PB1 | Philippines    | 2009-Mar-05 | A/PHILIPPINES/16/2009    | Research Institute of Tropical Medicine             | WHO Collaborating Centre for Reference and Research on Influenza |
| EPI301679 | PB1 | United States  | 2010-Nov-01 | A/Kentucky/09/2010       | Kentucky Division of Laboratory Services            | Centers for Disease Control and Prevention                       |
| EPI301162 | PB1 | China          | 2011-Jan-04 | A/Jiangsu/1/2011         |                                                     | WHO Chinese National Influenza Center                            |
| EPI300981 | PB1 | United States  | 2010-Nov-01 | A/Kentucky/09/2010       | Kentucky Division of Laboratory Services            | Centers for Disease Control and Prevention                       |
| EPI295479 | PB1 | United States  | 2010-Nov-16 | A/Pennsylvania/17/2010   | Pennsylvania Department of Health                   | Centers for Disease Control and Prevention                       |
| EPI295221 | PB1 | Mexico         | 2010-Sep-03 | A/Mexico/4553/2010       | Laboratorio de Virus Respiratorio                   | Centers for Disease Control and Prevention                       |
| EPI295213 | PB1 | Mexico         | 2010-Sep-03 | A/Mexico/4553/2010       | Laboratorio de Virus Respiratorio                   | Centers for Disease Control and Prevention                       |
| EPI295116 | PB1 | Kenya          | 2010-Jul-27 | A/Kenya/6063/2010        | CDC-Kenya                                           | Centers for Disease Control and Prevention                       |
| EPI294688 | PB1 | United Kingdom | 2010-Aug-01 | A/England/3220137/2010   | Centre for Infections, Health Protection Agency     | Centre for Infections, Health Protection Agency                  |
| EPI294680 | PB1 | United Kingdom | 2010-Nov-01 | A/England/118/2010       | Centre for Infections, Health Protection Agency     | Centre for Infections, Health Protection Agency                  |

Supplementary Table 1

|           |     |                  |             |                                 |                                                |                                                                  |
|-----------|-----|------------------|-------------|---------------------------------|------------------------------------------------|------------------------------------------------------------------|
| EPI353283 | PB1 | Australia        | 2010-Sep-19 | A/SYDNEY/217/2010               | Prince of Wales Hospital                       | WHO Collaborating Centre for Reference and Research on Influenza |
| EPI294377 | PB1 | Australia        | 2010-Sep-29 | A/VICTORIA/906/2010             | Austin Health                                  | WHO Collaborating Centre for Reference and Research on Influenza |
| EPI294249 | PB1 | Papua New Guinea | 2010-May-10 | A/VANIMO/3/2010                 | Papua New Guinea Institute of Medical Research | WHO Collaborating Centre for Reference and Research on Influenza |
| EPI293963 | PB1 | United States    | 2010-Nov-26 | A/Minnesota/11/2010             | Minnesota Department of Health                 | Centers for Disease Control and Prevention                       |
| EPI293886 | PB1 | China            | 2010-Oct-10 | A/Hubei-Wuchang/1271/2010       | WHO Chinese National Influenza Center          | WHO Chinese National Influenza Center                            |
| EPI293878 | PB1 | China            | 2010-Sep-19 | A/Shanghai-Luwan/1568/2010      | WHO Chinese National Influenza Center          | WHO Chinese National Influenza Center                            |
| EPI293862 | PB1 | China            | 2010-Aug-17 | A/Anhui-Baohe/1456/2010         | WHO Chinese National Influenza Center          | WHO Chinese National Influenza Center                            |
| EPI293854 | PB1 | China            | 2010-Aug-04 | A/Jiangxi-Donghu/1682/2010      | WHO Chinese National Influenza Center          | WHO Chinese National Influenza Center                            |
| EPI293846 | PB1 | China            | 2010-Jul-14 | A/Hubei-Enshi/1250/2010         | WHO Chinese National Influenza Center          | WHO Chinese National Influenza Center                            |
| EPI293838 | PB1 | China            | 2010-Jul-07 | A/Shanghai-Luwan/1400/2010      | WHO Chinese National Influenza Center          | WHO Chinese National Influenza Center                            |
| EPI293830 | PB1 | China            | 2010-May-12 | A/Tianjin-Hexi/1266/2010        | WHO Chinese National Influenza Center          | WHO Chinese National Influenza Center                            |
| EPI293822 | PB1 | China            | 2010-Apr-09 | A/Heilongjiang-Longsha/160/2010 | WHO Chinese National Influenza Center          | WHO Chinese National Influenza Center                            |
| EPI293806 | PB1 | China            | 2010-Mar-01 | A/Tianjin-Nankai/1842/2010      | WHO Chinese National Influenza Center          | WHO Chinese National Influenza Center                            |
| EPI293798 | PB1 | China            | 2010-Jan-06 | A/Beijing-Zhaoyang/141/2010     | WHO Chinese National Influenza Center          | WHO Chinese National Influenza Center                            |
| EPI293790 | PB1 | China            | 2010-Jan-05 | A/Tianjin-Hexi/18/2010          | WHO Chinese National Influenza Center          | WHO Chinese National Influenza Center                            |
| EPI293782 | PB1 | China            | 2010-Aug-18 | A/Liaoning-Zhenxing/1686/2010   | WHO Chinese National Influenza Center          | WHO Chinese National Influenza Center                            |
| EPI293774 | PB1 | China            | 2010-Feb-08 | A/Liaoning-Zhenxing/1109/2010   | WHO Chinese National Influenza Center          | WHO Chinese National Influenza Center                            |
| EPI293766 | PB1 | China            | 2010-Feb-11 | A/Liaoning-Tixi/130/2010        | WHO Chinese National Influenza Center          | WHO Chinese National Influenza Center                            |
| EPI293758 | PB1 | China            | 2010-Feb-11 | A/Liaoning-Tixi/129/2010        | WHO Chinese National Influenza Center          | WHO Chinese National Influenza Center                            |
| EPI293750 | PB1 | China            | 2010-Jan-07 | A/Liaoning-Donggang/120/2010    | WHO Chinese National Influenza Center          | WHO Chinese National Influenza Center                            |
| EPI292868 | PB1 | Australia        | 2009-Aug-28 | A/Brisbane/2015/2009            | Queensland Health Scientific Services          | WHO Collaborating Centre for Reference and Research on Influenza |
| EPI291887 | PB1 | United States    | 2008-Oct-15 | A/Texas/14/2008                 |                                                | Centers for Disease Control and Prevention                       |
| EPI291879 | PB1 | United States    | 2008-Dec-04 | A/South Dakota/03/2008          | Texas Department of State Health Services      | Centers for Disease Control and Prevention                       |
| EPI291867 | PB1 | United States    | 2010-Oct-26 | A/Pennsylvania/14/2010          | Pennsylvania Department of Health              | Centers for Disease Control and Prevention                       |
| EPI291848 | PB1 | United States    | 2009-May-18 | A/Minnesota/10/2009             | Minnesota Department of Health                 | Centers for Disease Control and Prevention                       |
| EPI291840 | PB1 | United States    | 2010-May-27 | A/Minnesota/09/2010             | Minnesota Department of Health                 | Centers for Disease Control and Prevention                       |
| EPI291832 | PB1 | United States    | 2008-Feb-03 | A/Minnesota/03/2008             | Minnesota Department of Health                 | Centers for Disease Control and Prevention                       |
| EPI291818 | PB1 | United States    | 2009-Nov-19 | A/Iowa/16/2009                  | Iowa State Hygienic Laboratory                 | Centers for Disease Control and Prevention                       |
| EPI291809 | PB1 | United States    | 2007-Nov-29 | A/Iowa/05/2007                  | The Nebraska Medical Center                    | Centers for Disease Control and Prevention                       |
| EPI291801 | PB1 | United States    | 2009-Feb-13 | A/Iowa/02/2009                  | Iowa State Hygienic Laboratory                 | Centers for Disease Control and Prevention                       |
| EPI291790 | PB1 | United States    | 2007-Sep-01 | A/Illinois/09/2007              | Illinois Department of Public Health           | Centers for Disease Control and Prevention                       |
| EPI291698 | PB1 | United States    | 1992-Jan-01 | A/Nebraska/01/1992              | Children's Memorial Hospital                   | Centers for Disease Control and Prevention                       |
| EPI291690 | PB1 | United States    | 1995-Jan-01 | A/Minnesota/18/1995             | Minnesota Department of Health                 | Centers for Disease Control and Prevention                       |
| EPI291674 | PB1 | United States    | 1994-Aug-22 | A/Indiana/01/1994               | Indiana State Department of Health             | Centers for Disease Control and Prevention                       |

Supplementary Table 1

|           |     |              |             |                           |                                      |                                                                  |
|-----------|-----|--------------|-------------|---------------------------|--------------------------------------|------------------------------------------------------------------|
| EPI280174 | PB1 | China        | 2009-Jan-23 | A/Hunan/2/2009            | WHO Chinese National Influenza Ce    | WHO Chinese National Influenza Center                            |
| EPI280166 | PB1 | China        | 2009-Jan-08 | A/Hunan/1/2009            | WHO Chinese National Influenza Ce    | WHO Chinese National Influenza Center                            |
| EPI280158 | PB1 | China        | 2008-Dec-04 | A/Beijing/1/2009          | WHO Chinese National Influenza Ce    | WHO Chinese National Influenza Center                            |
| EPI280150 | PB1 | China        | 2007-Dec-03 | A/Jiangsu/2/2007          | WHO Chinese National Influenza Ce    | WHO Chinese National Influenza Center                            |
| EPI280142 | PB1 | China        | 2007-Nov-24 | A/Jiangsu/1/2007          | WHO Chinese National Influenza Ce    | WHO Chinese National Influenza Center                            |
| EPI280134 | PB1 | China        | 2007-Feb-18 | A/Fujian/1/2007           | WHO Chinese National Influenza Ce    | WHO Chinese National Influenza Center                            |
| EPI280126 | PB1 | China        | 2006-Jun-19 | A/Xinjiang/1/2006         | WHO Chinese National Influenza Ce    | WHO Chinese National Influenza Center                            |
| EPI280118 | PB1 | China        | 2006-Apr-01 | A/Hubei/1/2006            | WHO Chinese National Influenza Ce    | WHO Chinese National Influenza Center                            |
| EPI280110 | PB1 | China        | 2006-Mar-13 | A/Shanghai/1/2006         | WHO Chinese National Influenza Ce    | WHO Chinese National Influenza Center                            |
| EPI280102 | PB1 | China        | 2006-Feb-22 | A/Guangdong/1/2006        | WHO Chinese National Influenza Ce    | WHO Chinese National Influenza Center                            |
| EPI280094 | PB1 | China        | 2006-Jan-27 | A/Hunan/1/2006            | WHO Chinese National Influenza Ce    | WHO Chinese National Influenza Center                            |
| EPI353532 | PB1 | Australia    | 2010-May-26 | A/Brisbane/11/2010        | WHO Collaborating Centre for Refe    | Centers for Disease Control and Prevention                       |
| EPI279230 | PB1 | Australia    | 2010-Jul-07 | A/DARWIN/36/2010          | Influenza Surveillance Centre for DI | WHO Collaborating Centre for Reference and Research on Influenza |
| EPI376921 | PB1 | Cambodia     | 2010-Jun-21 | A/CAMBODIA/1/2010         | Institute Pasteur du Cambodia        | WHO Collaborating Centre for Reference and Research on Influenza |
| EPI376947 | PB1 | Sri Lanka    | 2010-May-25 | A/SRI LANKA/7/2010        | Medical Research Institute           | WHO Collaborating Centre for Reference and Research on Influenza |
| EPI279127 | PB1 | New Zealan   | 2010-Jul-10 | A/SOUTH AUCKLAND/10/2010  | Institute of Environmental Science   | WHO Collaborating Centre for Reference and Research on Influenza |
| EPI279113 | PB1 | New Zealan   | 2010-Jul-03 | A/SOUTH AUCKLAND/2/2010   | Institute of Environmental Science   | WHO Collaborating Centre for Reference and Research on Influenza |
| EPI279030 | PB1 | Australia    | 2010-Jun-03 | A/PERTH/12/2010           | Pathwest QE II Medical Centre        | WHO Collaborating Centre for Reference and Research on Influenza |
| EPI279022 | PB1 | Australia    | 2010-Jun-29 | A/VICTORIA/5/2010         | Victorian Infectious Diseases Refer  | WHO Collaborating Centre for Reference and Research on Influenza |
| EPI284403 | PB1 | Australia    | 2010-Jun-21 | A/DARWIN/3/2010           | Influenza Surveillance Centre for DI | WHO Collaborating Centre for Reference and Research on Influenza |
| EPI278902 | PB1 | Russian Fed  | 2010-Feb-08 | A/St. Petersburg/204/2010 | Russian Academy of Medical Scienc    | Centers for Disease Control and Prevention                       |
| EPI278894 | PB1 | United State | 2010-Jun-01 | A/Texas/03/2010           | Texas Department of State Health S   | Centers for Disease Control and Prevention                       |
| EPI347075 | PB1 | United State | 2010-Mar-08 | A/Florida/08/2010         | Florida Department of Health-Jacks   | Centers for Disease Control and Prevention                       |
| EPI341642 | PB1 | United State | 2010-Jul-13 | A/Alabama/05/2010         | U.S. Air Force School of Aerospace   | Centers for Disease Control and Prevention                       |
| EPI353522 | PB1 | Panama       | 2010-Jun-08 | A/Panama/307149/2010      | Instituto Conmemorativo Gorgas d     | Centers for Disease Control and Prevention                       |
| EPI273870 | PB1 | United State | 2009-Oct-26 | A/Washington/75/2009      | University of Washington Molecula    | Centers for Disease Control and Prevention                       |
| EPI273863 | PB1 | United State | 2010-Apr-02 | A/Washington/01/2010      | University of Washington Molecula    | Centers for Disease Control and Prevention                       |
| EPI273827 | PB1 | United State | 2010-Apr-06 | A/Kentucky/06/2010        | Kentucky Division of Laboratory Ser  | Centers for Disease Control and Prevention                       |
| EPI273730 | PB1 | United State | 2010-Apr-05 | A/Connecticut/02/2010     | Connecticut Department. of Public    | Centers for Disease Control and Prevention                       |
| EPI273607 | PB1 | United State | 2009-Apr-09 | A/California/07/2009      | Naval Health Research Center         | Centers for Disease Control and Prevention                       |
| EPI273599 | PB1 | United State | 2009-Apr-16 | A/California/06/2009      | Naval Health Research Center         | Centers for Disease Control and Prevention                       |
| EPI272060 | PB1 | Australia    | 2009-Jun-02 | A/VICTORIA/208/2009       | Victorian Infectious Diseases Refer  | WHO Collaborating Centre for Reference and Research on Influenza |
| EPI270313 | PB1 | United State | 2010-Jan-26 | A/Rhode Island/01/2010    | Rhode Island Department of Health    | Centers for Disease Control and Prevention                       |
| EPI270294 | PB1 | India        | 2009-Sep-19 | A/India/2710/2009         | National Institute of Virology       | Centers for Disease Control and Prevention                       |

Supplementary Table 1

|           |     |             |             |                      |                                      |                                                                  |
|-----------|-----|-------------|-------------|----------------------|--------------------------------------|------------------------------------------------------------------|
| EPI270032 | PB1 | Macao       | 2010-Mar-08 | A/Macao/307249/2010  | Laboratorio De Saude Publico         | WHO Collaborating Centre for Reference and Research on Influenza |
| EPI269978 | PB1 | Singapore   | 2009-Nov-17 | A/Singapore/569/2009 | National Public Health Laboratory    | WHO Collaborating Centre for Reference and Research on Influenza |
| EPI346375 | PB1 | Australia   | 2009-Aug-12 | A/PERTH/261/2009     | Pathwest QE II Medical Centre        | WHO Collaborating Centre for Reference and Research on Influenza |
| EPI269965 | PB1 | Australia   | 2010-Feb-17 | A/Perth/500/2010     | Princess Margaret Hospital for Child | WHO Collaborating Centre for Reference and Research on Influenza |
| EPI269952 | PB1 | Australia   | 2010-Jan-01 | A/Brisbane/1/2010    | Queensland Health Scientific Serv    | WHO Collaborating Centre for Reference and Research on Influenza |
| EPI269933 | PB1 | Singapore   | 2009-Aug-13 | A/Singapore/591/2009 | National Public Health Laboratory    | WHO Collaborating Centre for Reference and Research on Influenza |
| EPI284415 | PB1 | Guam        | 2010-Mar-01 | A/Guam/2/2010        | PIHOA Regional Public Health Labo    | WHO Collaborating Centre for Reference and Research on Influenza |
| EPI267593 | PB1 | United King | 2009-Jun-01 | A/ENG/419/2009       | Centre for Infections, Health Protec | Centre for Infections, Health Protection Agency                  |
| EPI267585 | PB1 | United King | 2009-Jun-01 | A/ENG/418/2009       | Centre for Infections, Health Protec | Centre for Infections, Health Protection Agency                  |
| EPI267577 | PB1 | United King | 2009-Jun-01 | A/ENG/414/2009       | Centre for Infections, Health Protec | Centre for Infections, Health Protection Agency                  |
| EPI267569 | PB1 | United King | 2009-May-01 | A/ENG/359/2009       | Centre for Infections, Health Protec | Centre for Infections, Health Protection Agency                  |
| EPI267545 | PB1 | United King | 2009-Jun-01 | A/ENG/445/2009       | Centre for Infections, Health Protec | Centre for Infections, Health Protection Agency                  |
| EPI267537 | PB1 | United King | 2009-Jun-01 | A/ENG/433/2009       | Centre for Infections, Health Protec | Centre for Infections, Health Protection Agency                  |
| EPI267529 | PB1 | United King | 2009-Jun-01 | A/ENG/431/2009       | Centre for Infections, Health Protec | Centre for Infections, Health Protection Agency                  |
| EPI267513 | PB1 | United King | 2009-Jun-01 | A/ENG/428/2009       | Centre for Infections, Health Protec | Centre for Infections, Health Protection Agency                  |
| EPI267505 | PB1 | United King | 2009-Jun-01 | A/ENG/423/2009       | Centre for Infections, Health Protec | Centre for Infections, Health Protection Agency                  |
| EPI267497 | PB1 | United King | 2009-Jun-01 | A/ENG/402/2009       | Centre for Infections, Health Protec | Centre for Infections, Health Protection Agency                  |
| EPI267489 | PB1 | United King | 2009-Jun-01 | A/ENG/400/2009       | Centre for Infections, Health Protec | Centre for Infections, Health Protection Agency                  |
| EPI267481 | PB1 | United King | 2009-Jun-01 | A/ENG/395/2009       | Centre for Infections, Health Protec | Centre for Infections, Health Protection Agency                  |
| EPI267473 | PB1 | United King | 2009-Jun-01 | A/ENG/394/2009       | Centre for Infections, Health Protec | Centre for Infections, Health Protection Agency                  |
| EPI267465 | PB1 | United King | 2009-Jun-01 | A/ENG/388/2009       | Centre for Infections, Health Protec | Centre for Infections, Health Protection Agency                  |
| EPI267457 | PB1 | United King | 2009-Jun-01 | A/ENG/386/2009       | Centre for Infections, Health Protec | Centre for Infections, Health Protection Agency                  |
| EPI267449 | PB1 | United King | 2009-Jun-01 | A/ENG/385/2009       | Centre for Infections, Health Protec | Centre for Infections, Health Protection Agency                  |
| EPI267441 | PB1 | United King | 2009-Jun-01 | A/ENG/384/2009       | Centre for Infections, Health Protec | Centre for Infections, Health Protection Agency                  |
| EPI267433 | PB1 | United King | 2009-Jun-01 | A/ENG/382/2009       | Centre for Infections, Health Protec | Centre for Infections, Health Protection Agency                  |
| EPI267425 | PB1 | United King | 2009-Jun-01 | A/ENG/381/2009       | Centre for Infections, Health Protec | Centre for Infections, Health Protection Agency                  |
| EPI267417 | PB1 | United King | 2009-Jun-01 | A/ENG/361/2009       | Centre for Infections, Health Protec | Centre for Infections, Health Protection Agency                  |
| EPI267401 | PB1 | United King | 2009-May-01 | A/ENG/266/2009       | Centre for Infections, Health Protec | Centre for Infections, Health Protection Agency                  |
| EPI267393 | PB1 | United King | 2009-May-01 | A/ENG/XFL00482/2009  | Centre for Infections, Health Protec | Centre for Infections, Health Protection Agency                  |
| EPI267385 | PB1 | United King | 2009-May-01 | A/SC/4/2009          | Centre for Infections, Health Protec | Centre for Infections, Health Protection Agency                  |
| EPI267377 | PB1 | United King | 2009-Jul-01 | A/ENG/675/2009       | Centre for Infections, Health Protec | Centre for Infections, Health Protection Agency                  |
| EPI267369 | PB1 | United King | 2009-Jul-01 | A/ENG/634/2009       | Centre for Infections, Health Protec | Centre for Infections, Health Protection Agency                  |
| EPI267361 | PB1 | United King | 2009-Jul-01 | A/ENG/92860032/2009  | Centre for Infections, Health Protec | Centre for Infections, Health Protection Agency                  |
| EPI267353 | PB1 | United King | 2009-May-01 | A/ENG/XFL00300/2009  | Centre for Infections, Health Protec | Centre for Infections, Health Protection Agency                  |

Supplementary Table 1

|           |     |             |             |                                    |                                      |                                                 |
|-----------|-----|-------------|-------------|------------------------------------|--------------------------------------|-------------------------------------------------|
| EPI267345 | PB1 | United King | 2009-Apr-01 | A/ENG/223/2009                     | Centre for Infections, Health Protec | Centre for Infections, Health Protection Agency |
| EPI267337 | PB1 | United King | 2009-May-01 | A/ENG/XFL00304/2009                | Centre for Infections, Health Protec | Centre for Infections, Health Protection Agency |
| EPI267329 | PB1 | United King | 2009-May-01 | A/ENG/XFL00275/2009                | Centre for Infections, Health Protec | Centre for Infections, Health Protection Agency |
| EPI267321 | PB1 | United King | 2009-May-01 | A/ENG/220/2009                     | Centre for Infections, Health Protec | Centre for Infections, Health Protection Agency |
| EPI267313 | PB1 | United King | 2009-May-01 | A/ENG/257/2009                     | Centre for Infections, Health Protec | Centre for Infections, Health Protection Agency |
| EPI267305 | PB1 | United King | 2009-May-01 | A/ENG/XFL00419/2009                | Centre for Infections, Health Protec | Centre for Infections, Health Protection Agency |
| EPI267297 | PB1 | United King | 2009-Apr-01 | A/ENG/XFL00071/2009                | Centre for Infections, Health Protec | Centre for Infections, Health Protection Agency |
| EPI267289 | PB1 | United King | 2009-May-01 | A/ENG/218/2009                     | Centre for Infections, Health Protec | Centre for Infections, Health Protection Agency |
| EPI267281 | PB1 | United King | 2009-May-01 | A/ENG/254/2009                     | Centre for Infections, Health Protec | Centre for Infections, Health Protection Agency |
| EPI267273 | PB1 | United King | 2009-May-01 | A/ENG/259/2009                     | Centre for Infections, Health Protec | Centre for Infections, Health Protection Agency |
| EPI267265 | PB1 | United King | 2009-May-01 | A/ENG/XFL00418/2009                | Centre for Infections, Health Protec | Centre for Infections, Health Protection Agency |
| EPI267257 | PB1 | United King | 2009-May-01 | A/ENG/246/2009                     | Centre for Infections, Health Protec | Centre for Infections, Health Protection Agency |
| EPI267249 | PB1 | United King | 2009-Apr-01 | A/ENG/197/2009                     | Centre for Infections, Health Protec | Centre for Infections, Health Protection Agency |
| EPI267241 | PB1 | United King | 2009-May-01 | A/ENG/XFL00354/2009                | Centre for Infections, Health Protec | Centre for Infections, Health Protection Agency |
| EPI267233 | PB1 | United King | 2009-May-01 | A/ENG/XFL00311/2009                | Centre for Infections, Health Protec | Centre for Infections, Health Protection Agency |
| EPI267225 | PB1 | United King | 2009-Jun-01 | A/SC/10/2009                       | Centre for Infections, Health Protec | Centre for Infections, Health Protection Agency |
| EPI267217 | PB1 | United King | 2009-May-01 | A/ENG/XFL00200/2009                | Centre for Infections, Health Protec | Centre for Infections, Health Protection Agency |
| EPI267209 | PB1 | United King | 2009-May-01 | A/ENG/XFL00473/2009                | Centre for Infections, Health Protec | Centre for Infections, Health Protection Agency |
| EPI267030 | PB1 | China       | 2010-Jun-01 | A/Hubei/1/2010                     |                                      | WHO Chinese National Influenza Center           |
| EPI266221 | PB1 | China       | 2010-Feb-22 | A/Hubei-Hongshan/SWL143/2010       |                                      | WHO Chinese National Influenza Center           |
| EPI266213 | PB1 | China       | 2010-Apr-11 | A/Hubei-Wuchang/SWL174/2010        |                                      | WHO Chinese National Influenza Center           |
| EPI266205 | PB1 | China       | 2010-Apr-03 | A/Hubei-Wuchang/SWL171/2010        |                                      | WHO Chinese National Influenza Center           |
| EPI266197 | PB1 | China       | 2010-Mar-08 | A/Hubei-Songzi/SWL1166/2010        |                                      | WHO Chinese National Influenza Center           |
| EPI266189 | PB1 | China       | 2010-Feb-04 | A/Hubei-Songzi/SWL189/2010         |                                      | WHO Chinese National Influenza Center           |
| EPI266181 | PB1 | China       | 2010-Mar-03 | A/Hubei-Songzi/SWL1176/2010        |                                      | WHO Chinese National Influenza Center           |
| EPI266165 | PB1 | China       | 2010-Jan-28 | A/Hubei-Songzi/SWL160/2010         |                                      | WHO Chinese National Influenza Center           |
| EPI266149 | PB1 | China       | 2010-Jan-27 | A/Guangdong-Liwan/SWL172/2010      |                                      | WHO Chinese National Influenza Center           |
| EPI266141 | PB1 | China       | 2010-Mar-01 | A/Guangdong-Yuexiu/SWL1276/2010    |                                      | WHO Chinese National Influenza Center           |
| EPI266133 | PB1 | China       | 2010-Mar-14 | A/Guangdong-Liwan/SWL1170/2010     |                                      | WHO Chinese National Influenza Center           |
| EPI266125 | PB1 | China       | 2010-Mar-01 | A/Guangdong-Duanzhou/SWL1178/2010  |                                      | WHO Chinese National Influenza Center           |
| EPI266117 | PB1 | China       | 2010-Mar-10 | A/Guangdong-Duanzhou/SWL1198/2010  |                                      | WHO Chinese National Influenza Center           |
| EPI266109 | PB1 | China       | 2010-Jan-26 | A/Guangdong-Zhenjiang/SWL176/2010  |                                      | WHO Chinese National Influenza Center           |
| EPI266101 | PB1 | China       | 2010-Mar-18 | A/Guangdong-Wuijiang/SWL51/2010    |                                      | WHO Chinese National Influenza Center           |
| EPI266093 | PB1 | China       | 2010-Jan-29 | A/Guangdong-Jiangcheng/SWL181/2010 |                                      | WHO Chinese National Influenza Center           |

Supplementary Table 1

|           |     |              |             |                                   |                                     |                                            |
|-----------|-----|--------------|-------------|-----------------------------------|-------------------------------------|--------------------------------------------|
| EPI266085 | PB1 | China        | 2010-Jan-25 | A/Guangdong-Zhenjiang/SWL165/2010 |                                     | WHO Chinese National Influenza Center      |
| EPI258278 | PB1 | China        | 2009-Aug-29 | A/Henan/18/2009                   |                                     | WHO Chinese National Influenza Center      |
| EPI258270 | PB1 | China        | 2010-Jan-25 | A/Jilin-Nanguan/SWL181/2010       |                                     | WHO Chinese National Influenza Center      |
| EPI258262 | PB1 | China        | 2010-Feb-25 | A/Hubei-Wuchang/SWL145/2010       |                                     | WHO Chinese National Influenza Center      |
| EPI258254 | PB1 | China        | 2010-Feb-11 | A/Zhejiang-Haishu/SWL1289/2010    |                                     | WHO Chinese National Influenza Center      |
| EPI258246 | PB1 | China        | 2010-Jan-18 | A/Shaanxi-Beilin/SWL134/2010      |                                     | WHO Chinese National Influenza Center      |
| EPI258238 | PB1 | China        | 2010-Jan-27 | A/Jiangsu-Qinhuai/SWL167/2010     |                                     | WHO Chinese National Influenza Center      |
| EPI258230 | PB1 | China        | 2010-Feb-24 | A/Fujian-Yanping/SWL1115/2010     |                                     | WHO Chinese National Influenza Center      |
| EPI258222 | PB1 | China        | 2010-Mar-18 | A/Shanghai-Pudongxin/SWL1335/2010 |                                     | WHO Chinese National Influenza Center      |
| EPI257238 | PB1 | China        | 2009-Nov-06 | A/Sichuan-Wenjiang/SWL456/2009    |                                     | WHO Chinese National Influenza Center      |
| EPI256640 | PB1 | China        | 2009-Dec-20 | A/Guangxi/SWL8/2009               |                                     | WHO Chinese National Influenza Center      |
| EPI256632 | PB1 | China        | 2009-Dec-20 | A/Guangxi/SWL6/2009               |                                     | WHO Chinese National Influenza Center      |
| EPI256624 | PB1 | China        | 2009-Dec-20 | A/Guangxi/SWL5/2009               |                                     | WHO Chinese National Influenza Center      |
| EPI256616 | PB1 | China        | 2009-Dec-20 | A/Guangxi/SWL4/2009               |                                     | WHO Chinese National Influenza Center      |
| EPI256608 | PB1 | China        | 2009-Dec-20 | A/Guangxi/SWL11/2009              |                                     | WHO Chinese National Influenza Center      |
| EPI256600 | PB1 | China        | 2009-Dec-20 | A/Guangxi/SWL10/2009              |                                     | WHO Chinese National Influenza Center      |
| EPI256592 | PB1 | China        | 2009-Dec-20 | A/Guangxi/SWL9/2009               |                                     | WHO Chinese National Influenza Center      |
| EPI256584 | PB1 | China        | 2009-Dec-20 | A/Guangxi/SWL3/2009               |                                     | WHO Chinese National Influenza Center      |
| EPI256576 | PB1 | China        | 2009-Dec-20 | A/Guangxi/SWL7/2009               |                                     | WHO Chinese National Influenza Center      |
| EPI256492 | PB1 | China        | 2009-Nov-20 | A/Sichuan-Wuhou/SWL4391/2009      |                                     | WHO Chinese National Influenza Center      |
| EPI256484 | PB1 | China        | 2009-Nov-19 | A/Sichuan-Jinniu/SWL446/2009      |                                     | WHO Chinese National Influenza Center      |
| EPI256468 | PB1 | China        | 2009-Nov-30 | A/Beijing-Xicheng/SWL11649/2009   |                                     | WHO Chinese National Influenza Center      |
| EPI256448 | PB1 | China        | 2009-Nov-23 | A/Guangdong/SWL33/2009            |                                     | WHO Chinese National Influenza Center      |
| EPI256440 | PB1 | China        | 2009-Nov-20 | A/Guangdong/SWL32/2009            |                                     | WHO Chinese National Influenza Center      |
| EPI341647 | PB1 | Bangladesh   | 2009-May-17 | A/Bangladesh/5014/2009            | Institute of Epidemiology Disease C | Centers for Disease Control and Prevention |
| EPI254568 | PB1 | United State | 2010-Feb-02 | A/Georgia/08/2010                 | Georgia Public Health Laboratory    | Centers for Disease Control and Prevention |
| EPI254054 | PB1 | United State | 2009-Sep-30 | A/Wisconsin/67/2009               | Wisconsin State Laboratory of Hygi  | Centers for Disease Control and Prevention |
| EPI254048 | PB1 | Puerto Rico  | 2009-Dec-18 | A/Puerto Rico/20/2009             | Puerto Rico Department of Health    | Centers for Disease Control and Prevention |
| EPI254045 | PB1 | United State | 2009-Sep-16 | A/Wisconsin/66/2009               | Wisconsin State Laboratory of Hygi  | Centers for Disease Control and Prevention |
| EPI254004 | PB1 | United State | 2010-Mar-02 | A/Louisiana/03/2010               | Louisiana Department of Health an   | Centers for Disease Control and Prevention |
| EPI253528 | PB1 | China        | 2009-Jun-11 | A/Jiangsu/SWL1/2009               |                                     | WHO Chinese National Influenza Center      |
| EPI253468 | PB1 | China        | 2009-Sep-03 | A/Xinjiang/SWL1/2009              |                                     | WHO Chinese National Influenza Center      |
| EPI253460 | PB1 | China        | 2009-Sep-03 | A/Ningxia/SWL2/2009               |                                     | WHO Chinese National Influenza Center      |
| EPI253452 | PB1 | China        | 2009-Sep-02 | A/Xizang/SWL2/2009                |                                     | WHO Chinese National Influenza Center      |

Supplementary Table 1

|           |     |       |             |                          |                                       |
|-----------|-----|-------|-------------|--------------------------|---------------------------------------|
| EPI253444 | PB1 | China | 2009-Sep-02 | A/Xizang/SWL1/2009       | WHO Chinese National Influenza Center |
| EPI253436 | PB1 | China | 2009-Aug-08 | A/Guangdong/SWL28/2009   | WHO Chinese National Influenza Center |
| EPI253420 | PB1 | China | 2009-Jul-14 | A/Hunan/SWL18/2009       | WHO Chinese National Influenza Center |
| EPI253412 | PB1 | China | 2009-Jul-12 | A/Jiangxi/SWL8/2009      | WHO Chinese National Influenza Center |
| EPI253404 | PB1 | China | 2009-Jul-17 | A/Henan/SWL14/2009       | WHO Chinese National Influenza Center |
| EPI253396 | PB1 | China | 2009-Jul-03 | A/Hainan/SWL14/2009      | WHO Chinese National Influenza Center |
| EPI253388 | PB1 | China | 2009-Jul-06 | A/Jiangxi/SWL2/2009      | WHO Chinese National Influenza Center |
| EPI253380 | PB1 | China | 2009-Jun-26 | A/Guangdong/SWL27/2009   | WHO Chinese National Influenza Center |
| EPI253372 | PB1 | China | 2009-Jul-13 | A/Heilongjiang/SWL1/2009 | WHO Chinese National Influenza Center |
| EPI253364 | PB1 | China | 2009-Jun-02 | A/Shanghai/SWL121/2009   | WHO Chinese National Influenza Center |
| EPI253355 | PB1 | China | 2009-Jun-27 | A/Hainan/SWL5/2009       | WHO Chinese National Influenza Center |
| EPI253356 | PB1 | China | 2009-Jun-27 | A/Hainan/SWL5/2009       | WHO Chinese National Influenza Center |
| EPI253348 | PB1 | China | 2009-Jun-02 | A/Shanghai/SWL119/2009   | WHO Chinese National Influenza Center |
| EPI253340 | PB1 | China | 2009-Jun-01 | A/Shanghai/SWL120/2009   | WHO Chinese National Influenza Center |
| EPI253332 | PB1 | China | 2009-Jun-29 | A/Hainan/SWL6/2009       | WHO Chinese National Influenza Center |
| EPI253324 | PB1 | China | 2009-Jun-26 | A/Hunan/SWL12/2009       | WHO Chinese National Influenza Center |
| EPI253316 | PB1 | China | 2009-Jun-22 | A/Hunan/SWL9/2009        | WHO Chinese National Influenza Center |
| EPI253300 | PB1 | China | 2009-Jun-26 | A/Jilin/SWL2/2009        | WHO Chinese National Influenza Center |
| EPI253292 | PB1 | China | 2009-Jun-19 | A/Hunan/SWL4/2009        | WHO Chinese National Influenza Center |
| EPI253284 | PB1 | China | 2009-Jun-21 | A/Hunan/SWL5/2009        | WHO Chinese National Influenza Center |
| EPI253276 | PB1 | China | 2009-Jun-24 | A/Shaanxi/SWL1/2009      | WHO Chinese National Influenza Center |
| EPI253268 | PB1 | China | 2009-Jun-22 | A/Jilin/SWL1/2009        | WHO Chinese National Influenza Center |
| EPI253260 | PB1 | China | 2009-Jun-21 | A/Hebei/SWL1/2009        | WHO Chinese National Influenza Center |
| EPI253252 | PB1 | China | 2009-Jun-13 | A/Hunan/SWL3/2009        | WHO Chinese National Influenza Center |
| EPI253244 | PB1 | China | 2009-Jun-12 | A/Hainan/SWL2/2009       | WHO Chinese National Influenza Center |
| EPI253236 | PB1 | China | 2009-Jun-13 | A/Guangxi/SWL1/2009      | WHO Chinese National Influenza Center |
| EPI253220 | PB1 | China | 2009-Jun-18 | A/Anhui/SWL1/2009        | WHO Chinese National Influenza Center |
| EPI253212 | PB1 | China | 2009-Jun-12 | A/Yunnan/SWL1/2009       | WHO Chinese National Influenza Center |
| EPI253204 | PB1 | China | 2009-Jun-10 | A/Tianjin/SWL2/2009      | WHO Chinese National Influenza Center |
| EPI253196 | PB1 | China | 2009-Jun-11 | A/Liaoning/SWL1/2009     | WHO Chinese National Influenza Center |
| EPI253188 | PB1 | China | 2009-Jun-01 | A/Shanghai/SWL7/2009     | WHO Chinese National Influenza Center |
| EPI253180 | PB1 | China | 2009-May-28 | A/Shanghai/SWL6/2009     | WHO Chinese National Influenza Center |
| EPI253172 | PB1 | China | 2009-Jun-01 | A/Shanghai/SWL5/2009     | WHO Chinese National Influenza Center |
| EPI253164 | PB1 | China | 2009-May-31 | A/Shanghai/SWL4/2009     | WHO Chinese National Influenza Center |

Supplementary Table 1

|           |     |               |             |                          |                                           |                                            |
|-----------|-----|---------------|-------------|--------------------------|-------------------------------------------|--------------------------------------------|
| EPI253156 | PB1 | China         | 2009-Jun-03 | A/Shanxi/SWL1/2009       |                                           | WHO Chinese National Influenza Center      |
| EPI253148 | PB1 | China         | 2009-Jun-10 | A/Hainan/SWL1/2009       |                                           | WHO Chinese National Influenza Center      |
| EPI253140 | PB1 | China         | 2009-Jun-10 | A/Guizhou/SWL1/2009      |                                           | WHO Chinese National Influenza Center      |
| EPI253132 | PB1 | China         | 2009-May-30 | A/Beijing/SWL6/2009      |                                           | WHO Chinese National Influenza Center      |
| EPI253116 | PB1 | China         | 2009-Jun-10 | A/Jiangxi/SWL1/2009      |                                           | WHO Chinese National Influenza Center      |
| EPI253108 | PB1 | China         | 2009-May-31 | A/Zhejiang/SWL2/2009     |                                           | WHO Chinese National Influenza Center      |
| EPI253100 | PB1 | China         | 2009-Jun-08 | A/Tianjin/SWL1/2009      |                                           | WHO Chinese National Influenza Center      |
| EPI252202 | PB1 | New Zealand   | 2009-Jun-13 | A/New Zealand/871/2009   | Institute of Environmental Science        | Centers for Disease Control and Prevention |
| EPI252194 | PB1 | Chile         | 2009-May-30 | A/Chile/945/2009         | Instituto de Salud Publica de Chile       | Centers for Disease Control and Prevention |
| EPI252186 | PB1 | United States | 2010-Feb-06 | A/Georgia/04/2010        | Georgia Public Health Laboratory          | Centers for Disease Control and Prevention |
| EPI252161 | PB1 | United States | 2009-Aug-25 | A/West Virginia/13/2009  | Charleston Area Medical Center            | Centers for Disease Control and Prevention |
| EPI254014 | PB1 | United States | 2010-Mar-08 | A/Utah/03/2010           | Utah Department of Health                 | Centers for Disease Control and Prevention |
| EPI253990 | PB1 | United States | 2010-Feb-09 | A/New York/03/2010       | New York City Department of Health        | Centers for Disease Control and Prevention |
| EPI254009 | PB1 | United States | 2010-Mar-11 | A/Nebraska/02/2010       | Nebraska Public Health Lab                | Centers for Disease Control and Prevention |
| EPI253995 | PB1 | United States | 2010-Mar-03 | A/Iowa/04/2010           | Iowa State Hygienic Laboratory            | Centers for Disease Control and Prevention |
| EPI253951 | PB1 | United States | 2010-Mar-04 | A/California/05/2010     | California Department of Health Services  | Centers for Disease Control and Prevention |
| EPI254574 | PB1 | United States | 2010-Mar-01 | A/Alabama/03/2010        | ADPH Bureau of Clinical Laboratories      | Centers for Disease Control and Prevention |
| EPI280030 | PB1 | China         | 2006-Dec-10 | A/Anhui/1/2006           | WHO Chinese National Influenza Center     | WHO Chinese National Influenza Center      |
| EPI280072 | PB1 | China         | 2009-Jan-10 | A/Xinjiang/1/2009        | WHO Chinese National Influenza Center     | WHO Chinese National Influenza Center      |
| EPI280065 | PB1 | China         | 2009-Jan-05 | A/Shandong/1/2009        | WHO Chinese National Influenza Center     | WHO Chinese National Influenza Center      |
| EPI280079 | PB1 | China         | 2009-Jan-15 | A/Guizhou/1/2009         | WHO Chinese National Influenza Center     | WHO Chinese National Influenza Center      |
| EPI280086 | PB1 | China         | 2009-Jan-19 | A/Guangxi/1/2009         | WHO Chinese National Influenza Center     | WHO Chinese National Influenza Center      |
| EPI280058 | PB1 | China         | 2008-Feb-16 | A/Guangdong/1/2008       | WHO Chinese National Influenza Center     | WHO Chinese National Influenza Center      |
| EPI280051 | PB1 | China         | 2008-Feb-12 | A/Guangxi/1/2008         | WHO Chinese National Influenza Center     | WHO Chinese National Influenza Center      |
| EPI280044 | PB1 | China         | 2008-Jan-16 | A/Hunan/1/2008           | WHO Chinese National Influenza Center     | WHO Chinese National Influenza Center      |
| EPI280037 | PB1 | China         | 2007-Mar-17 | A/Anhui/1/2007           | WHO Chinese National Influenza Center     | WHO Chinese National Influenza Center      |
| EPI280023 | PB1 | China         | 2006-Jun-03 | A/Guangdong/2/2006       | WHO Chinese National Influenza Center     | WHO Chinese National Influenza Center      |
| EPI280016 | PB1 | China         | 2006-Apr-16 | A/Sichuan/3/2006         | WHO Chinese National Influenza Center     | WHO Chinese National Influenza Center      |
| EPI279947 | PB1 | China         | 2006-Feb-10 | A/Zhejiang/1/2006        | WHO Chinese National Influenza Center     | WHO Chinese National Influenza Center      |
| EPI250020 | PB1 | United States | 2010-Feb-24 | A/North Carolina/05/2010 | North Carolina State Laboratory of Health | Centers for Disease Control and Prevention |
| EPI250012 | PB1 | United States | 2010-Feb-03 | A/Indiana/03/2010        | Indiana State Department of Health        | Centers for Disease Control and Prevention |
| EPI249565 | PB1 | Hong Kong     | 2009-Oct-17 | A/Hong Kong/33773/2009   | Government Virus Unit                     | Centers for Disease Control and Prevention |
| EPI252105 | PB1 | United States | 2010-Feb-08 | A/Wyoming/01/2010        | Wyoming Public Health Laboratory          | Centers for Disease Control and Prevention |
| EPI347062 | PB1 | United States | 2010-Feb-17 | A/Wisconsin/02/2010      | Wisconsin State Laboratory of Hygiene     | Centers for Disease Control and Prevention |



Supplementary Table 1

|           |     |                    |             |                                |                                                                               |                                            |
|-----------|-----|--------------------|-------------|--------------------------------|-------------------------------------------------------------------------------|--------------------------------------------|
| EPI252100 | PB1 | United States      | 2010-Jan-24 | A/Wisconsin/01/2010            | Wisconsin State Laboratory of Hygiene                                         | Centers for Disease Control and Prevention |
| EPI254017 | PB1 | United States      | 2010-Jan-21 | A/Virginia/01/2010             | Virginia Division of Consolidated Laboratories                                | Centers for Disease Control and Prevention |
| EPI252094 | PB1 | United States      | 2010-Feb-04 | A/Vermont/01/2010              | Vermont Department of Health Laboratories                                     | Centers for Disease Control and Prevention |
| EPI247464 | PB1 | United States      | 2010-Feb-10 | A/Utah/02/2010                 | Utah Department of Health                                                     | Centers for Disease Control and Prevention |
| EPI252088 | PB1 | United States      | 2009-Dec-07 | A/Texas/75/2009                | Texas Department of State Health Services                                     | Centers for Disease Control and Prevention |
| EPI247433 | PB1 | United States      | 2010-Feb-23 | A/Tennessee/01/2010            | Tennessee Department of Health Laboratories                                   | Centers for Disease Control and Prevention |
| EPI247422 | PB1 | United States      | 2009-Sep-16 | A/South Carolina/18/2009       | South Carolina Department of Health and Environmental Control                 | Centers for Disease Control and Prevention |
| EPI252077 | PB1 | United States      | 2009-Dec-08 | A/Oregon/42/2009               | Oregon Public Health Laboratory                                               | Centers for Disease Control and Prevention |
| EPI251875 | PB1 | United States      | 2009-Nov-07 | A/New Mexico/16/2009           | New Mexico Department of Health                                               | Centers for Disease Control and Prevention |
| EPI252072 | PB1 | United States      | 2010-Jan-01 | A/New Jersey/01/2010           | New Jersey Department of Health and Senior Services                           | Centers for Disease Control and Prevention |
| EPI252067 | PB1 | United States      | 2010-Jan-12 | A/Nevada/01/2010               | Nevada State Health Laboratory                                                | Centers for Disease Control and Prevention |
| EPI254040 | PB1 | United States      | 2009-Dec-30 | A/Nebraska/23/2009             | Nebraska Public Health Lab                                                    | Centers for Disease Control and Prevention |
| EPI291910 | PB1 | United States      | 2009-Dec-23 | A/Minnesota/41/2009            | Minnesota Department of Health                                                | Centers for Disease Control and Prevention |
| EPI273693 | PB1 | United States      | 2009-Nov-09 | A/Minnesota/40/2009            | Minnesota Department of Health                                                | Centers for Disease Control and Prevention |
| EPI252061 | PB1 | United States      | 2010-Feb-03 | A/Louisiana/01/2010            | Louisiana Department of Health and Hospitals                                  | Centers for Disease Control and Prevention |
| EPI252056 | PB1 | Japan              | 2009-Nov-10 | A/Japan/4081/2009              | U.S. Air Force School of Aerospace Medicine                                   | Centers for Disease Control and Prevention |
| EPI252051 | PB1 | United States      | 2009-Dec-28 | A/Georgia/25/2009              | Georgia Public Health Laboratory                                              | Centers for Disease Control and Prevention |
| EPI247287 | PB1 | United States      | 2009-Jul-06 | A/Georgia/08/2009              | Georgia Public Health Laboratory                                              | Centers for Disease Control and Prevention |
| EPI252046 | PB1 | United States      | 2010-Feb-06 | A/Georgia/01/2010              | Georgia Public Health Laboratory                                              | Centers for Disease Control and Prevention |
| EPI253976 | PB1 | United States      | 2010-Feb-02 | A/Florida/02/2010              | Florida Department of Health-Jacksonville                                     | Centers for Disease Control and Prevention |
| EPI253971 | PB1 | United States      | 2010-Jan-06 | A/Florida/01/2010              | Florida Department of Health-Jacksonville                                     | Centers for Disease Control and Prevention |
| EPI252041 | PB1 | Ethiopia           | 2010-Jan-06 | A/Ethiopia/45/2010             | Ethiopian Health and Nutrition Research Institute                             | Centers for Disease Control and Prevention |
| EPI252036 | PB1 | Dominican Republic | 2009-Dec-15 | A/Dominican Republic/3768/2009 | Laboratorio de Investigacion / Centro de Referencia y Control de Enfermedades | Centers for Disease Control and Prevention |
| EPI252031 | PB1 | United States      | 2010-Jan-05 | A/Colorado/02/2010             | Colorado Department of Health and Human Services                              | Centers for Disease Control and Prevention |
| EPI252026 | PB1 | United States      | 2010-Feb-01 | A/California/02/2010           | California Department of Health Services                                      | Centers for Disease Control and Prevention |
| EPI252021 | PB1 | Bangladesh         | 2009-Nov-11 | A/Bangladesh/2001/2009         | Institute of Epidemiology Disease Control and Prevention                      | Centers for Disease Control and Prevention |
| EPI247199 | PB1 | Argentina          | 2009-Jun-19 | A/Argentina/8169/2009          | Instituto Nacional de Enfermedades Infecciosas                                | Centers for Disease Control and Prevention |
| EPI252015 | PB1 | United States      | 2009-Dec-04 | A/Alaska/47/2009               | Alaska State Virology Lab                                                     | Centers for Disease Control and Prevention |
| EPI247173 | PB1 | United States      | 2010-Feb-07 | A/Alaska/01/2010               | Alaska State Virology Lab                                                     | Centers for Disease Control and Prevention |
| EPI252010 | PB1 | United States      | 2010-Jan-04 | A/Alabama/01/2010              | ADPH Bureau of Clinical Laboratories                                          | Centers for Disease Control and Prevention |
| EPI246389 | PB1 | Germany            | 2009-Jan-01 | A/Germany-BY/74/09             |                                                                               | Friedrich-Loeffler-Institut                |
| EPI244299 | PB1 | United States      | 2009-Jul-27 | A/Kansas/13/2009               | Kansas Department of Health and Human Services                                | Centers for Disease Control and Prevention |
| EPI266899 | PB1 | Kenya              | 2009-Aug-14 | A/Kenya/1720/2009              |                                                                               | Centers for Disease Control and Prevention |
| EPI266849 | PB1 | China              | 2009-Aug-08 | A/Hong Kong/14775/2009         |                                                                               | Centers for Disease Control and Prevention |

Supplementary Table 1

|           |     |              |             |                                 |                                      |                                                 |
|-----------|-----|--------------|-------------|---------------------------------|--------------------------------------|-------------------------------------------------|
| EPI266874 | PB1 | China        | 2009-Jul-06 | A/Hong Kong/4458/2009           |                                      | Centers for Disease Control and Prevention      |
| EPI266839 | PB1 | China        | 2009-Oct-22 | A/Fujian-Shanghang/523/2009     |                                      | Centers for Disease Control and Prevention      |
| EPI266823 | PB1 | China        | 2009-Oct-17 | A/Beijing-Chaoyang/11263/2009   |                                      | Centers for Disease Control and Prevention      |
| EPI266818 | PB1 | China        | 2009-Oct-15 | A/Beijing-Chaoyang/11230/2009   |                                      | Centers for Disease Control and Prevention      |
| EPI266909 | PB1 | China        | 2009-Sep-23 | A/Sichuan-Xiqu/325/2009         |                                      | Centers for Disease Control and Prevention      |
| EPI266934 | PB1 | China        | 2009-Sep-23 | A/Zhejiang-Liandu/1339/2009     |                                      | Centers for Disease Control and Prevention      |
| EPI266889 | PB1 | China        | 2009-Sep-07 | A/Jiangsu-Quanshan/377/2009     |                                      | Centers for Disease Control and Prevention      |
| EPI244096 | PB1 | Vietnam      | 2005-Jun-27 | A/duck/Vietnam/TG24/05          |                                      | Friedrich-Loeffler-Institut                     |
| EPI252005 | PB1 | China        | 2009-Dec-04 | A/Hebei-Yuhua/Sw11441/2009      | WHO Chinese National Influenza C     | Centers for Disease Control and Prevention      |
| EPI252000 | PB1 | China        | 2009-Nov-20 | A/Guangdong-Xinxing/Sw1621/2009 | WHO Chinese National Influenza C     | Centers for Disease Control and Prevention      |
| EPI251995 | PB1 | Mexico       | 2009-Nov-18 | A/Mexico/476/2009               | Laboratorio de Virus Respiratorio    | Centers for Disease Control and Prevention      |
| EPI251990 | PB1 | Taiwan       | 2009-Nov-09 | A/Taiwan/1127/2009              | ADImmune Corporation                 | Centers for Disease Control and Prevention      |
| EPI253986 | PB1 | United State | 2010-Jan-05 | A/Iowa/01/2010                  | Iowa State Hygienic Laboratory       | Centers for Disease Control and Prevention      |
| EPI253981 | PB1 | United State | 2009-Dec-04 | A/Pennsylvania/31/2009          | Pennsylvania Department of Health    | Centers for Disease Control and Prevention      |
| EPI251985 | PB1 | Bangladesh   | 2009-Dec-19 | A/Bangladesh/3009/2009          | Institute of Epidemiology Disease C  | Centers for Disease Control and Prevention      |
| EPI252120 | PB1 | Peru         | 2009-Nov-17 | A/Peru/8409/2009                | US NAMRU-6                           | Centers for Disease Control and Prevention      |
| EPI243795 | PB1 | United State | 2009-Aug-01 | A/Texas/71/2009                 | U.S. Air Force School of Aerospace   | Centers for Disease Control and Prevention      |
| EPI347050 | PB1 | Hong Kong    | 2009-Nov-21 | A/Hong Kong/34360/2009          | Government Virus Unit                | Centers for Disease Control and Prevention      |
| EPI251977 | PB1 | United State | 2009-Dec-06 | A/Arizona/20/2009               | Arizona Department of Health Serv    | Centers for Disease Control and Prevention      |
| EPI251972 | PB1 | United State | 2009-Nov-13 | A/Arkansas/09/2009              | Arkansas Department of Health        | Centers for Disease Control and Prevention      |
| EPI251967 | PB1 | Russian Fed  | 2009-Nov-30 | A/Belgorod/01/2009              | Russian Academy of Medical Scienc    | Centers for Disease Control and Prevention      |
| EPI251962 | PB1 | Russian Fed  | 2009-Nov-02 | A/Kaliningrad/01/2009           | Russian Academy of Medical Scienc    | Centers for Disease Control and Prevention      |
| EPI243735 | PB1 | United State | 2009-Oct-22 | A/Montana/23/2009               | Montana Public Health Laboratory     | Centers for Disease Control and Prevention      |
| EPI251954 | PB1 | United State | 2009-Nov-24 | A/California/41/2009            | L.A. County Public Health Laborator  | Centers for Disease Control and Prevention      |
| EPI251949 | PB1 | United State | 2009-Nov-12 | A/Oklahoma/05/2009              | Oklahoma State Department of Hea     | Centers for Disease Control and Prevention      |
| EPI243671 | PB1 | United State | 2009-Apr-09 | A/California/08/2009            | Naval Health Research Center         | Centers for Disease Control and Prevention      |
| EPI266939 | PB1 | China        | 2009-Nov-02 | A/Sichuan-Dongqu/1836/2009      | WHO Chinese National Influenza C     | Centers for Disease Control and Prevention      |
| EPI341652 | PB1 | Colombia     | 2009-Jan-01 | A/Colombia/4335/2009            |                                      | Centers for Disease Control and Prevention      |
| EPI266924 | PB1 | Vietnam      | 2009-Jul-22 | A/Vietnam/2036/2009             | National Institute of Hygiene and E  | Centers for Disease Control and Prevention      |
| EPI249560 | PB1 | China        | 2009-Oct-23 | A/Hong Kong/33775/2009          | Government Virus Unit                | Centers for Disease Control and Prevention      |
| EPI266869 | PB1 | China        | 2009-Oct-21 | A/Hong Kong/33774/2009          | Government Virus Unit                | Centers for Disease Control and Prevention      |
| EPI240586 | PB1 | United King  | 2009-Apr-01 | A/Eng/XFL00137/2009             | Centre for Infections, Health Protec | Centre for Infections, Health Protection Agency |
| EPI240578 | PB1 | United King  | 2009-Apr-01 | A/Eng/91800797/2009             | Centre for Infections, Health Protec | Centre for Infections, Health Protection Agency |
| EPI240570 | PB1 | United King  | 2009-Jun-01 | A/ENG/434/2009                  | Centre for Infections, Health Protec | Centre for Infections, Health Protection Agency |

Supplementary Table 1

|           |     |              |             |                          |                                      |                                                 |
|-----------|-----|--------------|-------------|--------------------------|--------------------------------------|-------------------------------------------------|
| EPI240562 | PB1 | United King  | 2009-Jun-01 | A/ENG/411/2009           | Centre for Infections, Health Protec | Centre for Infections, Health Protection Agency |
| EPI240554 | PB1 | United King  | 2009-Jun-01 | A/ENG/398/2009           | Centre for Infections, Health Protec | Centre for Infections, Health Protection Agency |
| EPI240546 | PB1 | United King  | 2009-Jun-01 | A/ENG/392/2009           | Centre for Infections, Health Protec | Centre for Infections, Health Protection Agency |
| EPI240538 | PB1 | United King  | 2009-Jun-01 | A/ENG/389/2009           | Centre for Infections, Health Protec | Centre for Infections, Health Protection Agency |
| EPI240530 | PB1 | United King  | 2009-Jun-01 | A/ENG/541/2009           | Centre for Infections, Health Protec | Centre for Infections, Health Protection Agency |
| EPI240522 | PB1 | United King  | 2009-May-01 | A/ENG/247/2009           | Centre for Infections, Health Protec | Centre for Infections, Health Protection Agency |
| EPI240514 | PB1 | United King  | 2009-May-01 | A/ENG/263/2009           | Centre for Infections, Health Protec | Centre for Infections, Health Protection Agency |
| EPI240506 | PB1 | United King  | 2009-Apr-01 | A/ENG/551/2009           | Centre for Infections, Health Protec | Centre for Infections, Health Protection Agency |
| EPI240498 | PB1 | United King  | 2009-May-01 | A/ENG/201/2009           | Centre for Infections, Health Protec | Centre for Infections, Health Protection Agency |
| EPI240490 | PB1 | United King  | 2009-Apr-01 | A/ENG/205/2009           | Centre for Infections, Health Protec | Centre for Infections, Health Protection Agency |
| EPI240474 | PB1 | United King  | 2009-May-01 | A/ENG/265/2009           | Centre for Infections, Health Protec | Centre for Infections, Health Protection Agency |
| EPI240466 | PB1 | United King  | 2009-May-01 | A/Eng/XFL00481/2009      | Centre for Infections, Health Protec | Centre for Infections, Health Protection Agency |
| EPI240458 | PB1 | United King  | 2009-Apr-01 | A/ENG/202/2009           | Centre for Infections, Health Protec | Centre for Infections, Health Protection Agency |
| EPI240442 | PB1 | United King  | 2009-May-01 | A/ENG/256/2009           | Centre for Infections, Health Protec | Centre for Infections, Health Protection Agency |
| EPI240434 | PB1 | United King  | 2009-Apr-01 | A/ENG/204/2009           | Centre for Infections, Health Protec | Centre for Infections, Health Protection Agency |
| EPI252209 | PB1 | Puerto Rico  | 2009-Dec-06 | A/Puerto Rico/51/2009    | Puerto Rico Department of Health     | Centers for Disease Control and Prevention      |
| EPI240398 | PB1 | Canada       | 2009-Oct-16 | A/Ontario/RV3226/2009    | National Microbiology Laboratory,    | Centers for Disease Control and Prevention      |
| EPI251940 | PB1 | Korea, Repu  | 2009-Nov-02 | A/Gyeongnam/11177/2009   | National Institute of Health         | Centers for Disease Control and Prevention      |
| EPI239669 | PB1 | Hong Kong    | 2009-Sep-15 | A/Hong Kong/26579/2009   | Government Virus Unit                | Centers for Disease Control and Prevention      |
| EPI254560 | PB1 | United State | 2009-Dec-01 | A/Montana/22/2009        | Montana Public Health Laboratory     | Centers for Disease Control and Prevention      |
| EPI239591 | PB1 | United State | 2009-Oct-01 | A/North Carolina/45/2009 | North Carolina State Laboratory of   | Centers for Disease Control and Prevention      |
| EPI239584 | PB1 | United State | 2009-Sep-20 | A/North Carolina/44/2009 | North Carolina State Laboratory of   | Centers for Disease Control and Prevention      |
| EPI239576 | PB1 | United State | 2009-Oct-16 | A/North Carolina/43/2009 | North Carolina State Laboratory of   | Centers for Disease Control and Prevention      |
| EPI233197 | PB1 | United State | 2009-Oct-16 | A/North Carolina/46/2009 | Centers for Disease Control and Pre  | Centers for Disease Control and Prevention      |
| EPI233189 | PB1 | United State | 2009-Oct-16 | A/North Carolina/46/2009 | Centers for Disease Control and Pre  | Centers for Disease Control and Prevention      |
| EPI233168 | PB1 | United State | 2009-Oct-15 | A/North Carolina/39/2009 | Duke University Health System        | Centers for Disease Control and Prevention      |
| EPI240353 | PB1 | Iraq         | 2009-Sep-08 | A/Iraq/8529/2009         | U.S. Air Force School of Aerospace   | Centers for Disease Control and Prevention      |
| EPI232959 | PB1 | Mexico       | 2009-Mar-12 | A/Mexico/2964/2009       | Laboratorio de Virus Respiratorio    | Centers for Disease Control and Prevention      |
| EPI266859 | PB1 | China        | 2009-Sep-11 | A/Hong Kong/26552/2009   | Government Virus Unit                | Centers for Disease Control and Prevention      |
| EPI266854 | PB1 | China        | 2009-Sep-07 | A/Hong Kong/26547/2009   | Government Virus Unit                | Centers for Disease Control and Prevention      |
| EPI266813 | PB1 | Canada       | 2009-Sep-24 | A/Alberta/RV2859/2009    | National Microbiology Laboratory,    | Centers for Disease Control and Prevention      |
| EPI341677 | PB1 | Philippines  | 2009-May-26 | A/Philippines/2191/2009  | Thailand MOPH-U.S. CDC Collabora     | Centers for Disease Control and Prevention      |
| EPI341670 | PB1 | China        | 2009-Sep-18 | A/Hong Kong/26560/2009   | Government Virus Unit                | Centers for Disease Control and Prevention      |
| EPI341657 | PB1 | United State | 2009-Jan-01 | A/Florida/22/2009        |                                      | Centers for Disease Control and Prevention      |

Supplementary Table 1

|           |     |              |             |                                      |                                      |                                                     |
|-----------|-----|--------------|-------------|--------------------------------------|--------------------------------------|-----------------------------------------------------|
| EPI341687 | PB1 | Australia    | 2009-Jun-02 | A/Victoria/208/2009                  | WHO Collaborating Centre for Refe    | Centers for Disease Control and Prevention          |
| EPI253946 | PB1 | United State | 2009-Nov-02 | A/Wyoming/16/2009                    | Wyoming Public Health Laboratory     | Centers for Disease Control and Prevention          |
| EPI251918 | PB1 | United State | 2009-Nov-08 | A/Wisconsin/55/2009                  | Wisconsin State Laboratory of Hygi   | Centers for Disease Control and Prevention          |
| EPI251913 | PB1 | United State | 2009-Nov-09 | A/Washington/62/2009                 | Washington State Public Health Lab   | Centers for Disease Control and Prevention          |
| EPI231447 | PB1 | United State | 2009-Sep-29 | A/Texas/66/2009                      | Centers for Disease Control and Pre  | Centers for Disease Control and Prevention          |
| EPI347033 | PB1 | United State | 2009-Sep-29 | A/Texas/66/2009                      | Centers for Disease Control and Pre  | Centers for Disease Control and Prevention          |
| EPI347027 | PB1 | United State | 2009-Aug-27 | A/Mississippi/05/2009                | Centers for Disease Control and Pre  | Centers for Disease Control and Prevention          |
| EPI251903 | PB1 | United State | 2009-Nov-09 | A/Maine/13/2009                      | Maine Health and Environmental T     | Centers for Disease Control and Prevention          |
| EPI251898 | PB1 | United State | 2009-Nov-06 | A/Illinois/15/2009                   | Illinois Department of Public Health | Centers for Disease Control and Prevention          |
| EPI251893 | PB1 | United State | 2009-Nov-04 | A/Florida/25/2009                    | Florida Department of Health-Jacks   | Centers for Disease Control and Prevention          |
| EPI252112 | PB1 | Thailand     | 2009-Nov-15 | A/Ayutthaya/568/2009                 | WHO National Influenza Centre, Na    | Centers for Disease Control and Prevention          |
| EPI251888 | PB1 | Canada       | 2009-Nov-05 | A/Ontario/RV3181/2009                | National Microbiology Laboratory,    | Centers for Disease Control and Prevention          |
| EPI348788 | PB1 | Vietnam      | 2010-Nov-16 | A/duck/Vietnam/NCVD-458/2010         | National Institute of Hygiene and E  | Centers for Disease Control and Prevention          |
| EPI427348 | PB1 | Vietnam      | 2010-Dec-01 | A/chicken/Vietnam/NCVD-668/2010      | National Centre of Veterinary Diagn  | Centers for Disease Control and Prevention          |
| EPI348921 | PB1 | Vietnam      | 2010-May-12 | A/duck/Vietnam/NCVD-431/2010         | National Institute of Hygiene and E  | Centers for Disease Control and Prevention          |
| EPI301550 | PB1 | Saudi Arabia | 2006-Jan-01 | A/falcon/Saudi Arabia/08vir3489-40-a | Istituto Zooprofilattico Sperimenta  | Istituto Zooprofilattico Sperimentale Delle Venezie |
| EPI301464 | PB1 | Jordan       | 2004-Jan-01 | A/duck/Jordan/1436-890/2004          | Istituto Zooprofilattico Sperimenta  | Istituto Zooprofilattico Sperimentale Delle Venezie |
| EPI294652 | PB1 | Egypt        | 2010-Mar-15 | A/poultry/Egypt/3982-55/2010         | Istituto Zooprofilattico Sperimenta  | Istituto Zooprofilattico Sperimentale Delle Venezie |
| EPI350770 | PB1 | Vietnam      | 2008-Dec-01 | A/duck/Vietnam/NCVD-187/2008         | National Centre of Veterinary Diagn  | Centers for Disease Control and Prevention          |
| EPI351555 | PB1 | Vietnam      | 2008-Dec-01 | A/muscovy duck/Vietnam/NCVD-156/     | National Centre of Veterinary Diagn  | Centers for Disease Control and Prevention          |
| EPI351586 | PB1 | Vietnam      | 2008-Jan-01 | A/quail/Vietnam/NCVD-037/2008        | National Centre of Veterinary Diagn  | Centers for Disease Control and Prevention          |
| EPI351579 | PB1 | Vietnam      | 2010-Apr-01 | A/poultry/Vietnam/NCVD-416/2010      | National Centre of Veterinary Diagn  | Centers for Disease Control and Prevention          |
| EPI349087 | PB1 | Vietnam      | 2008-Dec-01 | A/avian/Vietnam/NCVD-133/2008        | National Centre of Veterinary Diagn  | Centers for Disease Control and Prevention          |
| EPI349080 | PB1 | Vietnam      | 2008-Dec-01 | A/avian/Vietnam/NCVD-132/2008        | National Centre of Veterinary Diagn  | Centers for Disease Control and Prevention          |
| EPI349073 | PB1 | Vietnam      | 2008-Dec-01 | A/avian/Vietnam/NCVD-125/2008        | National Centre of Veterinary Diagn  | Centers for Disease Control and Prevention          |
| EPI349066 | PB1 | Vietnam      | 2008-Dec-01 | A/avian/Vietnam/NCVD-124/2008        | National Centre of Veterinary Diagn  | Centers for Disease Control and Prevention          |
| EPI351572 | PB1 | Vietnam      | 2009-Jan-01 | A/ostrich/Vietnam/NCVD-373/2009      | National Centre of Veterinary Diagn  | Centers for Disease Control and Prevention          |
| EPI351548 | PB1 | Vietnam      | 2010-Apr-01 | A/muscovy duck/Vietnam/NCVD-401/     | National Centre of Veterinary Diagn  | Centers for Disease Control and Prevention          |
| EPI350707 | PB1 | Vietnam      | 2007-Jan-01 | A/duck/Vietnam/NCVD-110/2007         | National Centre of Veterinary Diagn  | Centers for Disease Control and Prevention          |
| EPI350581 | PB1 | Vietnam      | 2008-Jan-01 | A/duck/Vietnam/NCVD-011/2008         | National Centre of Veterinary Diagn  | Centers for Disease Control and Prevention          |
| EPI350525 | PB1 | Vietnam      | 2008-Jan-01 | A/duck/Vietnam/NCVD-010/2008         | National Centre of Veterinary Diagn  | Centers for Disease Control and Prevention          |
| EPI350518 | PB1 | Vietnam      | 2008-Jan-01 | A/duck/Vietnam/NCVD-009/2008         | National Centre of Veterinary Diagn  | Centers for Disease Control and Prevention          |
| EPI350644 | PB1 | Vietnam      | 2008-Jan-01 | A/duck/Vietnam/NCVD-024/2008         | National Centre of Veterinary Diagn  | Centers for Disease Control and Prevention          |
| EPI350511 | PB1 | Vietnam      | 2008-Jan-01 | A/duck/Vietnam/NCVD-001/2008         | National Centre of Veterinary Diagn  | Centers for Disease Control and Prevention          |







Supplementary Table 1

|           |     |         |             |                                  |                                     |                                            |
|-----------|-----|---------|-------------|----------------------------------|-------------------------------------|--------------------------------------------|
| EPI350163 | PB1 | Vietnam | 2010-Feb-01 | A/chicken/Vietnam/NCVD-394/2010  | National Centre of Veterinary Diagn | Centers for Disease Control and Prevention |
| EPI350107 | PB1 | Vietnam | 2009-Feb-01 | A/chicken/Vietnam/NCVD-292/2009  | National Centre of Veterinary Diagn | Centers for Disease Control and Prevention |
| EPI350051 | PB1 | Vietnam | 2009-Feb-01 | A/chicken/Vietnam/NCVD-291/2009  | National Centre of Veterinary Diagn | Centers for Disease Control and Prevention |
| EPI350044 | PB1 | Vietnam | 2009-Feb-01 | A/chicken/Vietnam/NCVD-290/2009  | National Centre of Veterinary Diagn | Centers for Disease Control and Prevention |
| EPI350037 | PB1 | Vietnam | 2009-Feb-01 | A/chicken/Vietnam/NCVD-289/2009  | National Centre of Veterinary Diagn | Centers for Disease Control and Prevention |
| EPI350023 | PB1 | Vietnam | 2009-Feb-01 | A/chicken/Vietnam/NCVD-283/2009  | National Centre of Veterinary Diagn | Centers for Disease Control and Prevention |
| EPI350016 | PB1 | Vietnam | 2009-Feb-01 | A/chicken/Vietnam/NCVD-282/2009  | National Centre of Veterinary Diagn | Centers for Disease Control and Prevention |
| EPI350009 | PB1 | Vietnam | 2009-Feb-01 | A/chicken/Vietnam/NCVD-281/2009  | National Centre of Veterinary Diagn | Centers for Disease Control and Prevention |
| EPI350483 | PB1 | Vietnam | 2008-Dec-01 | A/chicken/Vietnam/NCVD-swab276/2 | National Centre of Veterinary Diagn | Centers for Disease Control and Prevention |
| EPI349978 | PB1 | Vietnam | 2008-Dec-01 | A/chicken/Vietnam/NCVD-188/2008  | National Centre of Veterinary Diagn | Centers for Disease Control and Prevention |
| EPI349971 | PB1 | Vietnam | 2008-Dec-01 | A/chicken/Vietnam/NCVD-185/2008  | National Centre of Veterinary Diagn | Centers for Disease Control and Prevention |
| EPI349964 | PB1 | Vietnam | 2008-Dec-01 | A/chicken/Vietnam/NCVD-138/2008  | National Centre of Veterinary Diagn | Centers for Disease Control and Prevention |
| EPI349957 | PB1 | Vietnam | 2008-Dec-01 | A/chicken/Vietnam/NCVD-117/2008  | National Centre of Veterinary Diagn | Centers for Disease Control and Prevention |
| EPI350476 | PB1 | Vietnam | 2010-Apr-01 | A/chicken/Vietnam/NCVD-412/2010  | National Centre of Veterinary Diagn | Centers for Disease Control and Prevention |
| EPI350420 | PB1 | Vietnam | 2010-Apr-01 | A/chicken/Vietnam/NCVD-410/2010  | National Centre of Veterinary Diagn | Centers for Disease Control and Prevention |
| EPI350413 | PB1 | Vietnam | 2010-Apr-01 | A/chicken/Vietnam/NCVD-409/2010  | National Centre of Veterinary Diagn | Centers for Disease Control and Prevention |
| EPI350405 | PB1 | Vietnam | 2010-Apr-01 | A/chicken/Vietnam/NCVD-407/2010  | National Centre of Veterinary Diagn | Centers for Disease Control and Prevention |
| EPI350397 | PB1 | Vietnam | 2010-Apr-01 | A/chicken/Vietnam/NCVD-406/2010  | National Centre of Veterinary Diagn | Centers for Disease Control and Prevention |
| EPI350390 | PB1 | Vietnam | 2010-Apr-01 | A/chicken/Vietnam/NCVD-405/2010  | National Centre of Veterinary Diagn | Centers for Disease Control and Prevention |
| EPI350383 | PB1 | Vietnam | 2010-Apr-01 | A/chicken/Vietnam/NCVD-404/2010  | National Centre of Veterinary Diagn | Centers for Disease Control and Prevention |
| EPI350100 | PB1 | Vietnam | 2009-Jan-01 | A/chicken/Vietnam/NCVD-359/2009  | National Centre of Veterinary Diagn | Centers for Disease Control and Prevention |
| EPI350156 | PB1 | Vietnam | 2009-Jan-01 | A/chicken/Vietnam/NCVD-390/2009  | National Centre of Veterinary Diagn | Centers for Disease Control and Prevention |
| EPI350149 | PB1 | Vietnam | 2009-Jan-01 | A/chicken/Vietnam/NCVD-389/2009  | National Centre of Veterinary Diagn | Centers for Disease Control and Prevention |
| EPI350142 | PB1 | Vietnam | 2009-Jan-01 | A/chicken/Vietnam/NCVD-392/2009  | National Centre of Veterinary Diagn | Centers for Disease Control and Prevention |
| EPI350093 | PB1 | Vietnam | 2009-Jan-01 | A/chicken/Vietnam/NCVD-383/2009  | National Centre of Veterinary Diagn | Centers for Disease Control and Prevention |
| EPI350086 | PB1 | Vietnam | 2009-Jan-01 | A/chicken/Vietnam/NCVD-381/2009  | National Centre of Veterinary Diagn | Centers for Disease Control and Prevention |
| EPI350135 | PB1 | Vietnam | 2009-Jan-01 | A/chicken/Vietnam/NCVD-387/2009  | National Centre of Veterinary Diagn | Centers for Disease Control and Prevention |
| EPI350128 | PB1 | Vietnam | 2009-Jan-01 | A/chicken/Vietnam/NCVD-385/2009  | National Centre of Veterinary Diagn | Centers for Disease Control and Prevention |
| EPI350079 | PB1 | Vietnam | 2009-Jan-01 | A/chicken/Vietnam/NCVD-369/2009  | National Centre of Veterinary Diagn | Centers for Disease Control and Prevention |
| EPI350072 | PB1 | Vietnam | 2009-Jan-01 | A/chicken/Vietnam/NCVD-382/2009  | National Centre of Veterinary Diagn | Centers for Disease Control and Prevention |
| EPI350065 | PB1 | Vietnam | 2009-Jan-01 | A/chicken/Vietnam/NCVD-380/2009  | National Centre of Veterinary Diagn | Centers for Disease Control and Prevention |
| EPI270715 | PB1 | Poland  | 2009-Dec-27 | A/mallard/Poland/446/09          | National Veterinary Research Instit | National Veterinary Research Institute     |
| EPI427341 | PB1 | Vietnam | 2011-Feb-01 | A/chicken/Vietnam/NCVD-700/2011  | National Centre of Veterinary Diagn | Centers for Disease Control and Prevention |
| EPI427334 | PB1 | Vietnam | 2011-Feb-01 | A/chicken/Vietnam/NCVD-686/2011  | National Centre of Veterinary Diagn | Centers for Disease Control and Prevention |



Supplementary Table 1

|           |     |               |             |                                      |                                       |                                                     |
|-----------|-----|---------------|-------------|--------------------------------------|---------------------------------------|-----------------------------------------------------|
| EPI302177 | PB1 | Germany       | 2010-Jan-01 | A/chicken/Germany-NI/R874/2010       |                                       | Friedrich-Loeffler-Institut                         |
| EPI301645 | PB1 |               | 2009-Jan-01 | A/chicken/Kurdistan/4693-9/2009      | Istituto Zooprofilattico Sperimentale | Istituto Zooprofilattico Sperimentale Delle Venezie |
| EPI301637 | PB1 |               | 2009-Jan-01 | A/chicken/Kurdistan/4693-8/2009      | Istituto Zooprofilattico Sperimentale | Istituto Zooprofilattico Sperimentale Delle Venezie |
| EPI301629 | PB1 | Iran, Islamic | 2009-Jan-01 | A/chicken/Iran/10VIR854-4/2009       | Istituto Zooprofilattico Sperimentale | Istituto Zooprofilattico Sperimentale Delle Venezie |
| EPI301621 | PB1 | Iran, Islamic | 2002-Jan-01 | A/chicken/Iran/10VIR854-1/2002       | Istituto Zooprofilattico Sperimentale | Istituto Zooprofilattico Sperimentale Delle Venezie |
| EPI301613 | PB1 | Iran, Islamic | 2009-Jan-01 | A/chicken/Iran/10VIR854-3/2009       | Istituto Zooprofilattico Sperimentale | Istituto Zooprofilattico Sperimentale Delle Venezie |
| EPI301605 | PB1 | Iran, Islamic | 2008-Jan-01 | A/chicken/Iran/10VIR854-5/2008       | Istituto Zooprofilattico Sperimentale | Istituto Zooprofilattico Sperimentale Delle Venezie |
| EPI301597 | PB1 | United Arab   | 2008-Jan-01 | A/chicken/Dubai/09vir3771-3/2008     | Istituto Zooprofilattico Sperimentale | Istituto Zooprofilattico Sperimentale Delle Venezie |
| EPI301589 | PB1 | United Arab   | 2008-Jan-01 | A/chicken/Dubai/09vir3771-2/2008     | Istituto Zooprofilattico Sperimentale | Istituto Zooprofilattico Sperimentale Delle Venezie |
| EPI301582 | PB1 | Saudi Arabia  | 2008-Jan-01 | A/chicken/Saudi Arabia/08vir3489-50  | Istituto Zooprofilattico Sperimentale | Istituto Zooprofilattico Sperimentale Delle Venezie |
| EPI301574 | PB1 | Saudi Arabia  | 2008-Jan-01 | A/chicken/Saudi Arabia/08vir3489-51  | Istituto Zooprofilattico Sperimentale | Istituto Zooprofilattico Sperimentale Delle Venezie |
| EPI301566 | PB1 | Saudi Arabia  | 2007-Jan-01 | A/chicken/Saudi Arabia/08vir3489-47  | Istituto Zooprofilattico Sperimentale | Istituto Zooprofilattico Sperimentale Delle Venezie |
| EPI301558 | PB1 | Saudi Arabia  | 2007-Jan-01 | A/chicken/Saudi Arabia/08vir3489-48  | Istituto Zooprofilattico Sperimentale | Istituto Zooprofilattico Sperimentale Delle Venezie |
| EPI301534 | PB1 | Saudi Arabia  | 2006-Jan-01 | A/chicken/Saudi Arabia/08vir3489-44  | Istituto Zooprofilattico Sperimentale | Istituto Zooprofilattico Sperimentale Delle Venezie |
| EPI301520 | PB1 | Saudi Arabia  | 2005-Jan-01 | A/chicken/Saudi Arabia/08vir3489-33  | Istituto Zooprofilattico Sperimentale | Istituto Zooprofilattico Sperimentale Delle Venezie |
| EPI301512 | PB1 | Jordan        | 2007-Jan-01 | A/chicken/Jordan/09vir579-2/2007     | Istituto Zooprofilattico Sperimentale | Istituto Zooprofilattico Sperimentale Delle Venezie |
| EPI301504 | PB1 | Jordan        | 2007-Jan-01 | A/chicken/Jordan/09vir579-3/2007     | Istituto Zooprofilattico Sperimentale | Istituto Zooprofilattico Sperimentale Delle Venezie |
| EPI301496 | PB1 | Jordan        | 2010-Jan-01 | A/chicken/Jordan/436-2/2010          | Istituto Zooprofilattico Sperimentale | Istituto Zooprofilattico Sperimentale Delle Venezie |
| EPI301488 | PB1 | Jordan        | 2010-Jan-01 | A/chicken/Jordan/436-1/2010          | Istituto Zooprofilattico Sperimentale | Istituto Zooprofilattico Sperimentale Delle Venezie |
| EPI301480 | PB1 | Jordan        | 2004-Jan-01 | A/chicken/Jordan/1436-997/2004       | Istituto Zooprofilattico Sperimentale | Istituto Zooprofilattico Sperimentale Delle Venezie |
| EPI301456 | PB1 | Jordan        | 2004-Jan-01 | A/chicken/Jordan/1436-1451/2004      | Istituto Zooprofilattico Sperimentale | Istituto Zooprofilattico Sperimentale Delle Venezie |
| EPI293958 | PB1 | Turkey        | 2008-Mar-14 | A/Chicken/Turkey-Edirne/09rs2843-5   | Istituto Zooprofilattico Sperimentale | Istituto Zooprofilattico Sperimentale Delle Venezie |
| EPI293950 | PB1 | Turkey        | 2007-Feb-01 | A/Chicken/Turkey-Batman/09rs2842-    | Istituto Zooprofilattico Sperimentale | Istituto Zooprofilattico Sperimentale Delle Venezie |
| EPI293942 | PB1 | Turkey        | 2006-Feb-14 | A/Chicken/Turkey-Bitlis/09rs2841-93/ | Istituto Zooprofilattico Sperimentale | Istituto Zooprofilattico Sperimentale Delle Venezie |
| EPI293934 | PB1 | Turkey        | 2006-Jan-26 | A/Chicken/Turkey-Batman/09rs2841-    | Istituto Zooprofilattico Sperimentale | Istituto Zooprofilattico Sperimentale Delle Venezie |
| EPI293926 | PB1 | Turkey        | 2006-Jan-23 | A/Chicken/Turkey-Mus/09rs2841-51/    | Istituto Zooprofilattico Sperimentale | Istituto Zooprofilattico Sperimentale Delle Venezie |
| EPI293918 | PB1 | Turkey        | 2006-Jan-23 | A/Chicken/Turkey-Mus/09rs2841-50/    | Istituto Zooprofilattico Sperimentale | Istituto Zooprofilattico Sperimentale Delle Venezie |
| EPI293910 | PB1 | Turkey        | 2006-Jan-23 | A/Chicken/Turkey-Isparta/09rs2841-3  | Istituto Zooprofilattico Sperimentale | Istituto Zooprofilattico Sperimentale Delle Venezie |
| EPI294666 | PB1 | Egypt         | 2010-Feb-02 | A/chicken/Egypt/3982-78/2010         | Istituto Zooprofilattico Sperimentale | Istituto Zooprofilattico Sperimentale Delle Venezie |
| EPI294659 | PB1 | Egypt         | 2010-May-10 | A/poultry/Egypt/3982-56/2010         | Istituto Zooprofilattico Sperimentale | Istituto Zooprofilattico Sperimentale Delle Venezie |
| EPI294645 | PB1 | Egypt         | 2010-Jan-01 | A/chicken/Egypt/3982-52/2010         | Istituto Zooprofilattico Sperimentale | Istituto Zooprofilattico Sperimentale Delle Venezie |
| EPI294638 | PB1 | Egypt         | 2010-Jan-01 | A/chicken/Egypt/3982-50/2010         | Istituto Zooprofilattico Sperimentale | Istituto Zooprofilattico Sperimentale Delle Venezie |
| EPI294631 | PB1 | Egypt         | 2010-Jan-01 | A/chicken/Egypt/3982-44/2010         | Istituto Zooprofilattico Sperimentale | Istituto Zooprofilattico Sperimentale Delle Venezie |
| EPI294624 | PB1 | Egypt         | 2010-Jan-01 | A/chicken/Egypt/3982-43/2010         | Istituto Zooprofilattico Sperimentale | Istituto Zooprofilattico Sperimentale Delle Venezie |

Supplementary Table 1

|           |     |         |             |                                    |                                       |                                                     |
|-----------|-----|---------|-------------|------------------------------------|---------------------------------------|-----------------------------------------------------|
| EPI294610 | PB1 | Egypt   | 2010-Jul-02 | A/chicken/Egypt/3982-20/2010       | Istituto Zooprofilattico Sperimentale | Istituto Zooprofilattico Sperimentale Delle Venezie |
| EPI294603 | PB1 | Egypt   | 2010-Jul-02 | A/chicken/Egypt/3982-19/2010       | Istituto Zooprofilattico Sperimentale | Istituto Zooprofilattico Sperimentale Delle Venezie |
| EPI294596 | PB1 | Egypt   | 2010-Apr-21 | A/chicken/Egypt/3982-14/2010       | Istituto Zooprofilattico Sperimentale | Istituto Zooprofilattico Sperimentale Delle Venezie |
| EPI294589 | PB1 | Egypt   | 2010-Mar-07 | A/chicken/Egypt/3982-13/2010       | Istituto Zooprofilattico Sperimentale | Istituto Zooprofilattico Sperimentale Delle Venezie |
| EPI294575 | PB1 | Egypt   | 2010-Feb-24 | A/chicken/Egypt/3982-9/2010        | Istituto Zooprofilattico Sperimentale | Istituto Zooprofilattico Sperimentale Delle Venezie |
| EPI294568 | PB1 | Egypt   | 2010-Apr-11 | A/chicken/Egypt/3982-5/2010        | Istituto Zooprofilattico Sperimentale | Istituto Zooprofilattico Sperimentale Delle Venezie |
| EPI294561 | PB1 | Egypt   | 2010-Jan-15 | A/chicken/Egypt/3982-4/2010        | Istituto Zooprofilattico Sperimentale | Istituto Zooprofilattico Sperimentale Delle Venezie |
| EPI294554 | PB1 | Egypt   | 2010-Feb-01 | A/chicken/Egypt/3982-3/2010        | Istituto Zooprofilattico Sperimentale | Istituto Zooprofilattico Sperimentale Delle Venezie |
| EPI294547 | PB1 | Egypt   | 2010-Jan-25 | A/chicken/Egypt/3982-2/2010        | Istituto Zooprofilattico Sperimentale | Istituto Zooprofilattico Sperimentale Delle Venezie |
| EPI294540 | PB1 | Egypt   | 2010-Mar-27 | A/chicken/Egypt/2095-75/2010       | Istituto Zooprofilattico Sperimentale | Istituto Zooprofilattico Sperimentale Delle Venezie |
| EPI294533 | PB1 | Egypt   | 2010-Mar-23 | A/chicken/Egypt/2095-70/2010       | Istituto Zooprofilattico Sperimentale | Istituto Zooprofilattico Sperimentale Delle Venezie |
| EPI294526 | PB1 | Egypt   | 2010-Jan-11 | A/chicken/Egypt/2095-68/2010       | Istituto Zooprofilattico Sperimentale | Istituto Zooprofilattico Sperimentale Delle Venezie |
| EPI294519 | PB1 | Egypt   | 2010-Jan-31 | A/chicken/Egypt/2095-65/2010       | Istituto Zooprofilattico Sperimentale | Istituto Zooprofilattico Sperimentale Delle Venezie |
| EPI294510 | PB1 | Egypt   | 2010-Feb-01 | A/chicken/Egypt/2095-39/2010       | Istituto Zooprofilattico Sperimentale | Istituto Zooprofilattico Sperimentale Delle Venezie |
| EPI294503 | PB1 | Egypt   | 2010-Feb-01 | A/chicken/Egypt/1553-28/2010       | Istituto Zooprofilattico Sperimentale | Istituto Zooprofilattico Sperimentale Delle Venezie |
| EPI294496 | PB1 | Egypt   | 2010-Jan-01 | A/chicken/Egypt/1553-26/2010       | Istituto Zooprofilattico Sperimentale | Istituto Zooprofilattico Sperimentale Delle Venezie |
| EPI294489 | PB1 | Egypt   | 2010-Feb-01 | A/chicken/Egypt/1553-15/2010       | Istituto Zooprofilattico Sperimentale | Istituto Zooprofilattico Sperimentale Delle Venezie |
| EPI294482 | PB1 | Egypt   | 2010-Feb-01 | A/chicken/Egypt/1553-13/2010       | Istituto Zooprofilattico Sperimentale | Istituto Zooprofilattico Sperimentale Delle Venezie |
| EPI294475 | PB1 | Egypt   | 2010-Feb-01 | A/chicken/Egypt/1553-6/2010        | Istituto Zooprofilattico Sperimentale | Istituto Zooprofilattico Sperimentale Delle Venezie |
| EPI294468 | PB1 | Egypt   | 2010-Feb-01 | A/chicken/Egypt/1553-1/2010        | Istituto Zooprofilattico Sperimentale | Istituto Zooprofilattico Sperimentale Delle Venezie |
| EPI405134 | PB1 | Vietnam | 2011-Jan-01 | A/duck/Vietnam/NCVD-672/2011       | National Centre of Veterinary Diagn   | Centers for Disease Control and Prevention          |
| EPI294617 | PB1 | Egypt   | 2010-Jul-02 | A/duck/Egypt/3982-21/2010          | Istituto Zooprofilattico Sperimentale | Istituto Zooprofilattico Sperimentale Delle Venezie |
| EPI294582 | PB1 | Egypt   | 2010-Apr-13 | A/duck/Egypt/3982-12/2010          | Istituto Zooprofilattico Sperimentale | Istituto Zooprofilattico Sperimentale Delle Venezie |
| EPI246377 | PB1 | Germany | 2009-Jan-01 | A/wild duck/Germany/R2892/09       |                                       | Friedrich-Loeffler-Institut                         |
| EPI241727 | PB1 | Denmark | 2006-Mar-15 | A/tufted duck/Denmark/6431/2006    | National Veterinary Institute         | Statens Serum Institute                             |
| EPI241679 | PB1 | Denmark | 2006-Mar-19 | A/tufted duck/Denmark/6540/2006    | National Veterinary Institute         | Statens Serum Institute                             |
| EPI341704 | PB1 | Germany | 2011-May-24 | A/Mallard/Germany/1240/2007        | Friedrich-Loeffler-Institut           | Friedrich-Loeffler-Institut                         |
| EPI341693 | PB1 | Poland  | 2009-Aug-11 | A/mallard/Poland/214/09            | National Veterinary Research Institut | National Veterinary Research Institute              |
| EPI332898 | PB1 | France  | 2009-May-20 | A/Anas_platyrhynchos/Camargue/09   | Station Biologique "Tour du Valat"    | Institut Pasteur                                    |
| EPI257226 | PB1 | Belgium | 2008-Dec-01 | A/Anas platyrhynchos/09-884/2008   | Veterinary and Agrochemical Resea     | Veterinary and Agrochemical Research Institute      |
| EPI257218 | PB1 | Belgium | 2008-Nov-01 | A/Anas platyrhynchos/Belgium/09-76 | Veterinary and Agrochemical Resea     | Veterinary and Agrochemical Research Institute      |
| EPI257209 | PB1 | Belgium | 2008-Nov-01 | A/Anas platyrhynchos/Belgium/09-76 | Veterinary and Agrochemical Resea     | Veterinary and Agrochemical Research Institute      |
| EPI248499 | PB1 | Germany | 2009-Jan-01 | A/mallard/Germany-RP/R193/09       |                                       | Friedrich-Loeffler-Institut                         |
| EPI294448 | PB1 | Poland  | 2006-Sep-10 | A/mallard/Poland/358/06            | National Veterinary Research Instit   | National Veterinary Research Institute              |

Supplementary Table 1

|           |     |              |             |                                  |                                      |                                                                  |
|-----------|-----|--------------|-------------|----------------------------------|--------------------------------------|------------------------------------------------------------------|
| EPI301663 | PB1 | Germany      | 2010-May-01 | A/swine/Germany-NW/R708/10       |                                      | Friedrich-Loeffler-Institut                                      |
| EPI411895 | PB1 | Germany      | 2009-Jan-01 | A/swine/Germany-NI/R3394/09      |                                      | Friedrich-Loeffler-Institut                                      |
| EPI280254 | PB1 | China        | 2009-Jan-16 | A/water/Xinjiang/3/2009          | WHO Chinese National Influenza Ce    | WHO Chinese National Influenza Center                            |
| EPI287346 | PB1 | Germany      | 2009-Jan-01 | A/MDCK/Germany/[A/cygnus cygnus, | Friedrich-Loeffler-Institut          | Friedrich-Loeffler-Institut                                      |
| EPI287218 | PB1 | Germany      | 2008-Jan-01 | A/MDCK/Germany/[A/cygnus cygnus, | Friedrich-Loeffler-Institut          | Friedrich-Loeffler-Institut                                      |
| EPI330543 | PB1 | China        | 2011-Feb-20 | A/Chongqing-Wanzhou/182/2011     | WHO Chinese National Influenza Ce    | WHO Chinese National Influenza Center                            |
| EPI330314 | PB1 | China        | 2011-Mar-14 | A/Jilin-Chuanying/SWL1186/2011   | WHO Chinese National Influenza Ce    | WHO Chinese National Influenza Center                            |
| EPI330186 | PB1 | China        | 2011-Mar-01 | A/Hunan-Yanfeng/SWL140/2011      | WHO Chinese National Influenza Ce    | WHO Chinese National Influenza Center                            |
| EPI293870 | PB1 | China        | 2010-Sep-06 | A/Hubei-Qiaokou/1271/2010        | WHO Chinese National Influenza Ce    | WHO Chinese National Influenza Center                            |
| EPI293814 | PB1 | China        | 2010-Mar-24 | A/Tianjin-Nankai/1912/2010       | WHO Chinese National Influenza Ce    | WHO Chinese National Influenza Center                            |
| EPI266173 | PB1 | China        | 2010-Jan-28 | A/Hubei-Songzi/SWL161/2010       |                                      | WHO Chinese National Influenza Center                            |
| EPI266157 | PB1 | China        | 2010-Feb-01 | A/Guangdong-Liwan/SWL176/2010    |                                      | WHO Chinese National Influenza Center                            |
| EPI256476 | PB1 | China        | 2009-Nov-29 | A/Guangdong/SWL36/2009           |                                      | WHO Chinese National Influenza Center                            |
| EPI256456 | PB1 | China        | 2009-Nov-21 | A/Guangdong/SWL34/2009           |                                      | WHO Chinese National Influenza Center                            |
| EPI253476 | PB1 | China        | 2009-Aug-29 | A/Henan/SWL19/2009               |                                      | WHO Chinese National Influenza Center                            |
| EPI253428 | PB1 | China        | 2009-Aug-08 | A/Guangdong/SWL30/2009           |                                      | WHO Chinese National Influenza Center                            |
| EPI253308 | PB1 | China        | 2009-Jun-20 | A/Hunan/SWL6/2009                |                                      | WHO Chinese National Influenza Center                            |
| EPI253228 | PB1 | China        | 2009-Jun-17 | A/Chongqing/SWL1/2009            |                                      | WHO Chinese National Influenza Center                            |
| EPI253124 | PB1 | China        | 2009-May-30 | A/Hubei/SWL1/2009                |                                      | WHO Chinese National Influenza Center                            |
| EPI284413 | PB1 | Australia    | 2010-Jun-03 | A/Brisbane/12/2010               | Queensland Health Scientific Servic  | WHO Collaborating Centre for Reference and Research on Influenza |
| EPI269958 | PB1 | Australia    | 2010-Mar-12 | A/Brisbane/7/2010                | Queensland Health Scientific Servic  | WHO Collaborating Centre for Reference and Research on Influenza |
| EPI270040 | PB1 | Macao        | 2010-Jan-15 | A/Macau/200018/2010              | Laboratorio De Saude Publico         | WHO Collaborating Centre for Reference and Research on Influenza |
| EPI332658 | PB1 | Australia    | 2011-Feb-09 | A/Darwin/10/2011                 | Influenza Surveillance Centre for Di | WHO Collaborating Centre for Reference and Research on Influenza |
| EPI257144 | PB1 | Japan        | 2009-Sep-20 | A/SHIGA/44/2009-                 |                                      | National Institute of Infectious Diseases (NIID)                 |
| EPI302257 | PB1 | Taiwan       | 2010-Sep-15 | A/Taiwan/851/2010                | ADImmune Corporation                 | Centers for Disease Control and Prevention                       |
| EPI251925 | PB1 | Thailand     | 2009-Nov-03 | A/Surat Thani/563/2009           | WHO National Influenza Centre, Na    | Centers for Disease Control and Prevention                       |
| EPI253933 | PB1 | New Zealan   | 2009-Jun-12 | A/New Zealand/874/2009           | Institute of Environmental Science   | Centers for Disease Control and Prevention                       |
| EPI266864 | PB1 | China        | 2009-Oct-17 | A/Hong Kong/33773/2009           | Government Virus Unit                | Centers for Disease Control and Prevention                       |
| EPI320171 | PB1 | Russian Fed  | 2011-Mar-14 | A/Voronezh/1/2011                | Russian Academy of Medical Scienc    | Centers for Disease Control and Prevention                       |
| EPI326340 | PB1 | United State | 2010-Dec-30 | A/Iowa/19/2010                   | WHO Collaborating Centre for Refe    | Centers for Disease Control and Prevention                       |
| EPI295124 | PB1 | Kenya        | 2010-Jul-27 | A/Kenya/6063/2010                | CDC-Kenya                            | Centers for Disease Control and Prevention                       |
| EPI295109 | PB1 | Kenya        | 2010-Jul-27 | A/Kenya/6063/2010                | CDC-Kenya                            | Centers for Disease Control and Prevention                       |
| EPI250043 | PB1 | Lao, People  | 2009-Aug-22 | A/Laos/138/2009                  | National Center for Laboratory and   | Centers for Disease Control and Prevention                       |
| EPI253999 | PB1 | Suriname     | 2010-Feb-01 | A/Suriname/0777/2010             | Caribbean Epidemiology Center        | Centers for Disease Control and Prevention                       |

Supplementary Table 1

|           |     |                |             |                                      |                                                 |                                                     |
|-----------|-----|----------------|-------------|--------------------------------------|-------------------------------------------------|-----------------------------------------------------|
| EPI335616 | PB1 | United States  | 2011-Aug-25 | A/Pennsylvania/11/2011               | University of Pittsburgh Medical Center         | Centers for Disease Control and Prevention          |
| EPI320075 | PB1 | United States  | 2011-Feb-07 | A/New Mexico/04/2011                 | New Mexico Department of Health                 | Centers for Disease Control and Prevention          |
| EPI316061 | PB1 | United States  | 2011-Jan-22 | A/Illinois/03/2011                   | Illinois Department of Public Health            | Centers for Disease Control and Prevention          |
| EPI252083 | PB1 | United States  | 2010-Jan-27 | A/South Carolina/01/2010             | South Carolina Department of Health             | Centers for Disease Control and Prevention          |
| EPI243928 | PB1 | United States  | 2009-Sep-16 | A/South Carolina/18/2009             | South Carolina Department of Health             | Centers for Disease Control and Prevention          |
| EPI252178 | PB1 | United States  | 2010-Feb-05 | A/Georgia/06/2010                    | Georgia Public Health Laboratory                | Centers for Disease Control and Prevention          |
| EPI291895 | PB1 | United States  | 2010-Nov-02 | A/Wisconsin/12/2010                  | Evanston Hospital and NorthShore                | Centers for Disease Control and Prevention          |
| EPI320134 | PB1 | United States  | 2011-Feb-23 | A/Pennsylvania/08/2011               | Pennsylvania Department of Health               | Centers for Disease Control and Prevention          |
| EPI340982 | PB1 | United States  | 2011-Oct-22 | A/Indiana/10/2011                    | Indiana State Department of Health              | Centers for Disease Control and Prevention          |
| EPI291682 | PB1 | United States  | 1995-Jul-27 | A/Indiana/05/1995                    | Indiana State Department of Health              | Centers for Disease Control and Prevention          |
| EPI347016 | PB1 | United States  | 2009-Dec-07 | A/Iowa/14/2009                       | Iowa State Hygienic Laboratory                  | Centers for Disease Control and Prevention          |
| EPI346914 | PB1 | United States  | 2011-Dec-01 | A/Wisconsin/28/2011                  | Wisconsin State Laboratory of Hygiene           | Centers for Disease Control and Prevention          |
| EPI291706 | PB1 | United States  | 1990-Mar-13 | A/Oklahoma/11/1990                   | Oklahoma State Department of Health             | Centers for Disease Control and Prevention          |
| EPI309801 | PB1 | United States  | 2011-Feb-01 | A/Arizona/01/2011                    | Arizona Department of Health Services           | Centers for Disease Control and Prevention          |
| EPI310013 | PB1 | United States  | 2011-Feb-18 | A/Minnesota/03/2011                  | Minnesota Department of Health                  | Centers for Disease Control and Prevention          |
| EPI266828 | PB1 | China          | 2009-Sep-09 | A/Beijing-Chaoyang/1792/2009         |                                                 | Centers for Disease Control and Prevention          |
| EPI240316 | PB1 | United Kingdom | 2009-May-01 | A/England/195/2009                   |                                                 | Centers for Disease Control and Prevention          |
| EPI267561 | PB1 | United Kingdom | 2009-May-01 | A/ENG/252/2009                       | Centre for Infections, Health Protection Agency | Centre for Infections, Health Protection Agency     |
| EPI267553 | PB1 | United Kingdom | 2009-May-01 | A/ENG/253/2009                       | Centre for Infections, Health Protection Agency | Centre for Infections, Health Protection Agency     |
| EPI267521 | PB1 | United Kingdom | 2009-Jun-01 | A/ENG/430/2009                       | Centre for Infections, Health Protection Agency | Centre for Infections, Health Protection Agency     |
| EPI267409 | PB1 | United Kingdom | 2009-May-01 | A/ENG/XFL00532/2009                  | Centre for Infections, Health Protection Agency | Centre for Infections, Health Protection Agency     |
| EPI267201 | PB1 | United Kingdom | 2009-May-01 | A/ENG/219/2009                       | Centre for Infections, Health Protection Agency | Centre for Infections, Health Protection Agency     |
| EPI240482 | PB1 | United Kingdom | 2009-Apr-01 | A/Eng/91800799/2009                  | Centre for Infections, Health Protection Agency | Centre for Infections, Health Protection Agency     |
| EPI240450 | PB1 | United Kingdom | 2009-May-01 | A/ENG/264/2009                       | Centre for Infections, Health Protection Agency | Centre for Infections, Health Protection Agency     |
| EPI301542 | PB1 | Saudi Arabia   | 2006-Jan-01 | A/quail/Saudi Arabia/08vir3489-46-as | Istituto Zooprofilattico Sperimentale           | Istituto Zooprofilattico Sperimentale Delle Venezie |
| EPI350637 | PB1 | Vietnam        | 2007-Jan-01 | A/duck/Vietnam/NCVD-105/2007         | National Centre of Veterinary Diagnostics       | Centers for Disease Control and Prevention          |
| EPI350623 | PB1 | Vietnam        | 2007-Jan-01 | A/duck/Vietnam/NCVD-100/2007         | National Centre of Veterinary Diagnostics       | Centers for Disease Control and Prevention          |
| EPI350532 | PB1 | Vietnam        | 2008-Jan-01 | A/duck/Vietnam/NCVD-013/2008         | National Centre of Veterinary Diagnostics       | Centers for Disease Control and Prevention          |
| EPI350602 | PB1 | Vietnam        | 2008-Jan-01 | A/duck/Vietnam/NCVD-028/2008         | National Centre of Veterinary Diagnostics       | Centers for Disease Control and Prevention          |
| EPI350721 | PB1 | Vietnam        | 2008-Dec-01 | A/duck/Vietnam/NCVD-142/2008         | National Centre of Veterinary Diagnostics       | Centers for Disease Control and Prevention          |
| EPI350805 | PB1 | Vietnam        | 2009-Jan-01 | A/duck/Vietnam/NCVD-363/2009         | National Centre of Veterinary Diagnostics       | Centers for Disease Control and Prevention          |
| EPI350875 | PB1 | Vietnam        | 2009-Jan-01 | A/duck/Vietnam/NCVD-376/2009         | National Centre of Veterinary Diagnostics       | Centers for Disease Control and Prevention          |
| EPI349992 | PB1 | Vietnam        | 2007-Jan-01 | A/chicken/Vietnam/NCVD-106/2007      | National Centre of Veterinary Diagnostics       | Centers for Disease Control and Prevention          |
| EPI349827 | PB1 | Vietnam        | 2008-Jan-01 | A/chicken/Vietnam/NCVD-025/2008      | National Centre of Veterinary Diagnostics       | Centers for Disease Control and Prevention          |

Supplementary Table 1

|           |     |              |             |                                     |                                       |                                                                  |
|-----------|-----|--------------|-------------|-------------------------------------|---------------------------------------|------------------------------------------------------------------|
| EPI349920 | PB1 | Vietnam      | 2008-May-01 | A/chicken/Vietnam/NCVD-086/2008     | National Centre of Veterinary Diagr   | Centers for Disease Control and Prevention                       |
| EPI349888 | PB1 | Vietnam      | 2008-May-01 | A/chicken/Vietnam/NCVD-080/2008     | National Centre of Veterinary Diagr   | Centers for Disease Control and Prevention                       |
| EPI350121 | PB1 | Vietnam      | 2009-Mar-01 | A/chicken/Vietnam/NCVD-296/2009     | National Centre of Veterinary Diagr   | Centers for Disease Control and Prevention                       |
| EPI350030 | PB1 | Vietnam      | 2009-Feb-01 | A/chicken/Vietnam/NCVD-288/2009     | National Centre of Veterinary Diagr   | Centers for Disease Control and Prevention                       |
| EPI301472 | PB1 | Jordan       | 2004-Jan-01 | A/chicken/Jordan/1436-643/2004      | Istituto Zooprofilattico Sperimentale | Istituto Zooprofilattico Sperimentale Delle Venezie              |
| EPI178526 | PB1 | Italy        | 2004-Jan-01 | A/Goose/Italy/6117/2004             |                                       | Istituto Zooprofilattico Sperimentale della Lombardia e dell'Emi |
| EPI168477 | PB1 | Vietnam      | 2001-Jan-01 | A/goose/Vietnam/113/2001            |                                       | Centers for Disease Control and Prevention                       |
| EPI168470 | PB1 | Vietnam      | 2001-Jan-01 | A/goose/Vietnam/324/2001            |                                       | Centers for Disease Control and Prevention                       |
| EPI174886 | PB1 | Denmark      | 1996-Apr-09 | A/ostrich/Denmark/96-72420/1996     | Technical University of Denmark       | National Veterinary Institute                                    |
| EPI154495 | PB1 | Saudi Arabia | 2007-Jan-01 | A/ostrich/Saudi Arabia/6732-3/2007  |                                       | Istituto Zooprofilattico Sperimentale Delle Venezie              |
| EPI186390 | PB1 | Slovenia     | 2006-Jan-01 | A/cygnus olor/Slovenia/156/2006     | University of Ljubljana               | Friedrich-Loeffler-Institut                                      |
| EPI156843 | PB1 | Poland       | 2006-Apr-03 | A/swan/Poland/1242-139V08/2006      |                                       | National Veterinary Research Institute                           |
| EPI156827 | PB1 | Poland       | 2006-Mar-10 | A/swan/Poland/467-136V08/2006       |                                       | National Veterinary Research Institute                           |
| EPI156795 | PB1 | Poland       | 2006-Mar-04 | A/swan/Poland/305-135V08/2006       |                                       | National Veterinary Research Institute                           |
| EPI178465 | PB1 | Italy        | 1967-Jan-01 | A/Turkey/Italy/928/1967             |                                       | Istituto Zooprofilattico Sperimentale della Lombardia e dell'Emi |
| EPI154946 | PB1 | Egypt        | 2007-Jan-01 | A/turkey/Egypt/1709-9VIR08/2007     |                                       | Istituto Zooprofilattico Sperimentale Delle Venezie              |
| EPI186393 | PB1 | Slovenia     | 2006-Jan-01 | A/Ardea cinera/Slovenia/185/2006    | University of Ljubljana               | Friedrich-Loeffler-Institut                                      |
| EPI178549 | PB1 | Italy        | 1966-Jan-01 | A/Quail/Italy/1966                  |                                       | Istituto Zooprofilattico Sperimentale della Lombardia e dell'Emi |
| EPI174824 | PB1 | Denmark      | 2002-Oct-03 | A/cormorant/Denmark/74-68899-G2     | Technical University of Denmark       | National Veterinary Institute                                    |
| EPI156835 | PB1 | Poland       | 2006-Mar-24 | A/hawk/Poland/937-138V08/2006       |                                       | National Veterinary Research Institute                           |
| EPI156819 | PB1 | Poland       | 2006-Mar-11 | A/goosander/Poland/502-137V08/2006  |                                       | National Veterinary Research Institute                           |
| EPI156811 | PB1 | Poland       | 2007-Dec-11 | A/buzzard/Poland/MB266B-141V08/2007 |                                       | National Veterinary Research Institute                           |
| EPI156754 | PB1 | Togo         | 2007-Jan-01 | A/avian/Togo/3618-10/2007           |                                       | Istituto Zooprofilattico Sperimentale Delle Venezie              |
| EPI176576 | PB1 | Italy        | 2006-Jan-01 | A/swine/Italy/3275/06               |                                       | Istituto Zooprofilattico Sperimentale Delle Venezie              |
| EPI176570 | PB1 | Italy        | 2006-Jan-01 | A/swine/Italy/3274/06               |                                       | Istituto Zooprofilattico Sperimentale Delle Venezie              |
| EPI176565 | PB1 | Italy        | 2006-Jan-01 | A/swine/Italy/2559/06               |                                       | Istituto Zooprofilattico Sperimentale Delle Venezie              |
| EPI176560 | PB1 | Italy        | 2006-Jan-01 | A/swine/Italy/4159/06               |                                       | Istituto Zooprofilattico Sperimentale Delle Venezie              |
| EPI176554 | PB1 | Italy        | 2006-Jan-01 | A/swine/Italy/3279/06               |                                       | Istituto Zooprofilattico Sperimentale Delle Venezie              |
| EPI176548 | PB1 | Italy        | 2006-Jan-01 | A/swine/Italy/711/06                |                                       | Istituto Zooprofilattico Sperimentale Delle Venezie              |
| EPI176542 | PB1 | Italy        | 2006-Jan-01 | A/swine/Italy/537/06                |                                       | Istituto Zooprofilattico Sperimentale Delle Venezie              |
| EPI176536 | PB1 | Italy        | 2007-Jan-01 | A/swine/Italy/327/07                |                                       | Istituto Zooprofilattico Sperimentale Delle Venezie              |
| EPI257193 | PB1 | Japan        | 2009-Aug-22 | A/SAPPORO/190/2009                  |                                       | National Institute of Infectious Diseases (NIID)                 |
| EPI257161 | PB1 | Japan        | 2009-Jun-11 | A/CHIBA/1017/2009                   |                                       | National Institute of Infectious Diseases (NIID)                 |
| EPI257199 | PB1 | Japan        | 2009-Sep-20 | A/SHIGA/44/2009                     |                                       | National Institute of Infectious Diseases (NIID)                 |

Supplementary Table 1

|           |     |               |             |                          |                                                                 |                                                  |
|-----------|-----|---------------|-------------|--------------------------|-----------------------------------------------------------------|--------------------------------------------------|
| EPI257187 | PB1 | Japan         | 2009-Sep-16 | A/OSAKA/2032/2009        |                                                                 | National Institute of Infectious Diseases (NIID) |
| EPI257181 | PB1 | Japan         | 2009-Sep-09 | A/OSAKA/2031/2009        |                                                                 | National Institute of Infectious Diseases (NIID) |
| EPI257174 | PB1 | Japan         | 2009-Aug-31 | A/OKINAWA/283/2009       |                                                                 | National Institute of Infectious Diseases (NIID) |
| EPI257168 | PB1 | Japan         | 2009-Aug-28 | A/KAGOSHIMA/56/2009      |                                                                 | National Institute of Infectious Diseases (NIID) |
| EPI257155 | PB1 | Japan         | 2009-Jun-06 | A/CHIBA/1016/2009        |                                                                 | National Institute of Infectious Diseases (NIID) |
| EPI227933 | PB1 | United States | 2009-Oct-06 | A/Colorado/13/2009       | Centers for Disease Control and Prevention                      | Centers for Disease Control and Prevention       |
| EPI227915 | PB1 | United States | 2009-Jun-08 | A/Wisconsin/26/2009      | City of Milwaukee Health Department                             | Centers for Disease Control and Prevention       |
| EPI227908 | PB1 | United States | 2009-Oct-23 | A/West Virginia/09/2009  | Charleston Area Medical Center                                  | Centers for Disease Control and Prevention       |
| EPI227892 | PB1 | United States | 2009-Jun-03 | A/Virginia/24/2009       | Virginia Division of Consolidated Laboratories                  | Centers for Disease Control and Prevention       |
| EPI227879 | PB1 | United States | 2009-Aug-25 | A/Utah/51/2009           | Utah Department of Health                                       | Centers for Disease Control and Prevention       |
| EPI227873 | PB1 | United States | 2009-Jun-03 | A/Utah/27/2009           | Utah Public Health Laboratory                                   | Centers for Disease Control and Prevention       |
| EPI227868 | PB1 | United States | 2009-Jun-25 | A/Utah/22/2009           | Utah Public Health Laboratory                                   | Centers for Disease Control and Prevention       |
| EPI227862 | PB1 | United States | 2009-Jun-22 | A/Utah/21/2009           | Utah Public Health Laboratory                                   | Centers for Disease Control and Prevention       |
| EPI227854 | PB1 | Mongolia      | 2009-Oct-19 | A/Ulaanbaatar/5974/2009  | National Center for Communicable Disease Control and Prevention | Centers for Disease Control and Prevention       |
| EPI227839 | PB1 | United States | 2009-Sep-13 | A/Texas/67/2009          | Centers for Disease Control and Prevention                      | Centers for Disease Control and Prevention       |
| EPI231448 | PB1 | United States | 2009-Sep-13 | A/Texas/67/2009          | Centers for Disease Control and Prevention                      | Centers for Disease Control and Prevention       |
| EPI227818 | PB1 | Saudi Arabia  | 2009-Jul-29 | A/Saudi Arabia/4285/2009 | Ministry of Health Riyadh                                       | Centers for Disease Control and Prevention       |
| EPI227809 | PB1 | United States | 2009-Oct-27 | A/Rhode Island/18/2009   | Rhode Island Department of Health                               | Centers for Disease Control and Prevention       |
| EPI227801 | PB1 | United States | 2009-Jun-13 | A/Rhode Island/15/2009   | Rhode Island Department of Health                               | Centers for Disease Control and Prevention       |
| EPI227790 | PB1 | United States | 2009-Jun-19 | A/Pennsylvania/13/2009   | Pennsylvania Department of Health                               | Centers for Disease Control and Prevention       |
| EPI227783 | PB1 | United States | 2009-Jun-18 | A/Oregon/13/2009         | Oregon Public Health Laboratory                                 | Centers for Disease Control and Prevention       |
| EPI227775 | PB1 | United States | 2009-Jun-18 | A/Oregon/11/2009         | Oregon Public Health Laboratory                                 | Centers for Disease Control and Prevention       |
| EPI227768 | PB1 | United States | 2009-Jun-15 | A/Oregon/10/2009         | Oregon Public Health Laboratory                                 | Centers for Disease Control and Prevention       |
| EPI227757 | PB1 | United States | 2009-Sep-10 | A/North Carolina/37/2009 | North Carolina State Laboratory of Health                       | Centers for Disease Control and Prevention       |
| EPI231490 | PB1 | United States | 2009-Jun-22 | A/New York/98/2009       | Erie County Medical Center                                      | Centers for Disease Control and Prevention       |
| EPI227721 | PB1 | United States | 2009-Aug-28 | A/Minnesota/16/2009      | Iowa College of Public Health                                   | Centers for Disease Control and Prevention       |
| EPI227714 | PB1 | United States | 2009-Aug-28 | A/Minnesota/15/2009      | Iowa College of Public Health                                   | Centers for Disease Control and Prevention       |
| EPI227703 | PB1 | United States | 2009-Jun-03 | A/Michigan/10/2009       |                                                                 | Centers for Disease Control and Prevention       |
| EPI227700 | PB1 | United States | 2009-Jun-03 | A/Michigan/10/2009       | Michigan Department of Community Health                         | Centers for Disease Control and Prevention       |
| EPI251908 | PB1 | United States | 2009-Nov-09 | A/Maryland/31/2009       | Maryland Department of Health and General Services              | Centers for Disease Control and Prevention       |
| EPI227688 | PB1 | Nicaragua     | 2009-Aug-25 | A/Managua/6502/2009      | Laboratorio de Virologia, Direccion General de Salud            | Centers for Disease Control and Prevention       |
| EPI239595 | PB1 | India         | 2009-Sep-16 | A/India/2993/2009        | Centers for Disease Control and Prevention                      | Centers for Disease Control and Prevention       |
| EPI227648 | PB1 | Costa Rica    | 2009-Jul-13 | A/Costa Rica/3149/2009   | Laboratorio Nacional de Influenza                               | Centers for Disease Control and Prevention       |
| EPI227638 | PB1 | Chile         | 2009-Jul-05 | A/Chile/1579/2009        | Instituto de Salud Publica de Chile                             | Centers for Disease Control and Prevention       |

Supplementary Table 1

|           |     |             |             |                      |                                    |                                                  |
|-----------|-----|-------------|-------------|----------------------|------------------------------------|--------------------------------------------------|
| EPI226598 | PB1 | Japan       | 2009-Jan-01 | A/SHIMANE/188/2009   |                                    | National Institute of Infectious Diseases (NIID) |
| EPI226590 | PB1 | Japan       | 2009-Jan-01 | A/SHIGA/61/2009      |                                    | National Institute of Infectious Diseases (NIID) |
| EPI226582 | PB1 | Japan       | 2009-Jan-01 | A/Sendai-H/1434/2009 |                                    | National Institute of Infectious Diseases (NIID) |
| EPI226574 | PB1 | Japan       | 2009-Jan-01 | A/NIIGATA/1234/2009  |                                    | National Institute of Infectious Diseases (NIID) |
| EPI226566 | PB1 | Lao, People | 2009-Jan-01 | A/Laos/JP1413/2009   |                                    | National Institute of Infectious Diseases (NIID) |
| EPI226558 | PB1 | Japan       | 2009-Oct-16 | A/YOKOHAMA/1394/2009 |                                    | National Institute of Infectious Diseases (NIID) |
| EPI226550 | PB1 | Japan       | 2009-Aug-19 | A/YOKOHAMA/1311/2009 |                                    | National Institute of Infectious Diseases (NIID) |
| EPI226542 | PB1 | Japan       | 2009-Jun-20 | A/YOKOHAMA/1017/2009 |                                    | National Institute of Infectious Diseases (NIID) |
| EPI226534 | PB1 | Japan       | 2009-May-08 | A/YOKOHAMA/1000/2009 |                                    | National Institute of Infectious Diseases (NIID) |
| EPI226526 | PB1 | Japan       | 2009-Jul-23 | A/YAMANASHI/260/2009 |                                    | National Institute of Infectious Diseases (NIID) |
| EPI226518 | PB1 | Japan       | 2009-Aug-18 | A/YAMAGUCHI/58/2009  |                                    | National Institute of Infectious Diseases (NIID) |
| EPI226510 | PB1 | Japan       | 2009-Aug-18 | A/YAMAGUCHI/56/2009  |                                    | National Institute of Infectious Diseases (NIID) |
| EPI226502 | PB1 | Japan       | 2009-Jul-24 | A/YAMAGUCHI/52/2009  |                                    | National Institute of Infectious Diseases (NIID) |
| EPI226494 | PB1 | Japan       | 2009-Sep-17 | A/YAMAGUCHI/128/2009 | Yamaguchi Prefectural Institute of | National Institute of Infectious Diseases (NIID) |
| EPI226486 | PB1 | Japan       | 2009-Sep-24 | A/YAMAGATA/313/2009  |                                    | National Institute of Infectious Diseases (NIID) |
| EPI226478 | PB1 | Japan       | 2009-Jul-23 | A/WAKAYAMA/78/2009   |                                    | National Institute of Infectious Diseases (NIID) |
| EPI226470 | PB1 | Japan       | 2009-Jul-04 | A/WAKAYAMA/54/2009   |                                    | National Institute of Infectious Diseases (NIID) |
| EPI226462 | PB1 | Japan       | 2009-Jul-23 | A/TOCHIGI/154/2009   |                                    | National Institute of Infectious Diseases (NIID) |
| EPI226454 | PB1 | Japan       | 2009-Jul-27 | A/SHIZUOKA/851/2009  |                                    | National Institute of Infectious Diseases (NIID) |
| EPI226446 | PB1 | Japan       | 2009-Jul-14 | A/SHIZUOKA/832/2009  |                                    | National Institute of Infectious Diseases (NIID) |
| EPI226438 | PB1 | Japan       | 2009-Jun-27 | A/SHIZUOKA/826/2009  |                                    | National Institute of Infectious Diseases (NIID) |
| EPI226430 | PB1 | Japan       | 2009-Oct-21 | A/SHIZUOKA/1131/2009 |                                    | National Institute of Infectious Diseases (NIID) |
| EPI226422 | PB1 | Japan       | 2009-Jul-28 | A/SHIMANE/1010/2009  |                                    | National Institute of Infectious Diseases (NIID) |
| EPI226414 | PB1 | Japan       | 2009-Jul-08 | A/SHIMANE/1004/2009  |                                    | National Institute of Infectious Diseases (NIID) |
| EPI226406 | PB1 | Japan       | 2009-Oct-01 | A/SHIGA/45/2009      |                                    | National Institute of Infectious Diseases (NIID) |
| EPI226398 | PB1 | Japan       | 2009-Aug-11 | A/SHIGA/43/2009      |                                    | National Institute of Infectious Diseases (NIID) |
| EPI226390 | PB1 | Japan       | 2009-Jun-14 | A/SAITAMA/63/2009    |                                    | National Institute of Infectious Diseases (NIID) |
| EPI226382 | PB1 | Japan       | 2009-May-21 | A/SAITAMA/43/2009    |                                    | National Institute of Infectious Diseases (NIID) |
| EPI226374 | PB1 | Japan       | 2009-Aug-28 | A/SAITAMA-C/88/2009  |                                    | National Institute of Infectious Diseases (NIID) |
| EPI226366 | PB1 | Japan       | 2009-Jun-22 | A/SAITAMA-C/29/2009  |                                    | National Institute of Infectious Diseases (NIID) |
| EPI226358 | PB1 | Japan       | 2009-Sep-19 | A/SAITAMA-C/131/2009 |                                    | National Institute of Infectious Diseases (NIID) |
| EPI226350 | PB1 | Japan       | 2009-Aug-23 | A/OKINAWA/259/2009   |                                    | National Institute of Infectious Diseases (NIID) |
| EPI226342 | PB1 | Japan       | 2009-Aug-21 | A/OKINAWA/258/2009   |                                    | National Institute of Infectious Diseases (NIID) |
| EPI226334 | PB1 | Japan       | 2009-Aug-17 | A/OKINAWA/257/2009   |                                    | National Institute of Infectious Diseases (NIID) |

Supplementary Table 1

|           |     |             |             |                        |                                                  |
|-----------|-----|-------------|-------------|------------------------|--------------------------------------------------|
| EPI226326 | PB1 | Japan       | 2009-Aug-18 | A/OKINAWA/256/2009     | National Institute of Infectious Diseases (NIID) |
| EPI226318 | PB1 | Japan       | 2009-Aug-14 | A/OKINAWA/254/2009     | National Institute of Infectious Diseases (NIID) |
| EPI226310 | PB1 | Japan       | 2009-Jul-12 | A/OITA/40/2009         | National Institute of Infectious Diseases (NIID) |
| EPI226302 | PB1 | Japan       | 2009-Jul-03 | A/OITA/37/2009         | National Institute of Infectious Diseases (NIID) |
| EPI226294 | PB1 | Japan       | 2009-Jul-16 | A/OITA/126/2009        | National Institute of Infectious Diseases (NIID) |
| EPI226286 | PB1 | Japan       | 2009-Aug-07 | A/NIIGATA/871/2009     | National Institute of Infectious Diseases (NIID) |
| EPI226278 | PB1 | Japan       | 2009-Jul-22 | A/NIIGATA/805/2009     | National Institute of Infectious Diseases (NIID) |
| EPI226270 | PB1 | Japan       | 2009-Oct-02 | A/NIIGATA/1176/2009    | National Institute of Infectious Diseases (NIID) |
| EPI226262 | PB1 | Japan       | 2009-Sep-24 | A/NIIGATA/1141/2009    | National Institute of Infectious Diseases (NIID) |
| EPI226254 | PB1 | Japan       | 2009-Aug-17 | A/NIIGATA-C/56/2009    | National Institute of Infectious Diseases (NIID) |
| EPI226246 | PB1 | Japan       | 2009-Aug-27 | A/NAGANO/RC1/2009      | National Institute of Infectious Diseases (NIID) |
| EPI226238 | PB1 | Japan       | 2009-Jul-23 | A/NAGANO-C/40/2009     | National Institute of Infectious Diseases (NIID) |
| EPI226230 | PB1 | Japan       | 2009-Jul-15 | A/NAGANO-C/34/2009     | National Institute of Infectious Diseases (NIID) |
| EPI226222 | PB1 | Mongolia    | 2009-Oct-15 | A/Mongolia/JP5759/2009 | National Institute of Infectious Diseases (NIID) |
| EPI226214 | PB1 | Mongolia    | 2009-Oct-14 | A/Mongolia/JP5701/2009 | National Institute of Infectious Diseases (NIID) |
| EPI226206 | PB1 | Mongolia    | 2009-Oct-14 | A/Mongolia/JP5699/2009 | National Institute of Infectious Diseases (NIID) |
| EPI226198 | PB1 | Mongolia    | 2009-Oct-14 | A/Mongolia/JP5627/2009 | National Institute of Infectious Diseases (NIID) |
| EPI226190 | PB1 | Mongolia    | 2009-Oct-13 | A/Mongolia/JP5621/2009 | National Institute of Infectious Diseases (NIID) |
| EPI226182 | PB1 | Mongolia    | 2009-Oct-13 | A/Mongolia/JP5581/2009 | National Institute of Infectious Diseases (NIID) |
| EPI226174 | PB1 | Japan       | 2009-Jun-24 | A/MIE/32/2009          | National Institute of Infectious Diseases (NIID) |
| EPI226166 | PB1 | Lao, People | 2009-Jul-20 | A/Laos/JP1432/2009     | National Institute of Infectious Diseases (NIID) |
| EPI226158 | PB1 | Lao, People | 2009-Jul-19 | A/Laos/JP1424/2009     | National Institute of Infectious Diseases (NIID) |
| EPI226150 | PB1 | Lao, People | 2009-Jul-19 | A/Laos/JP1422/2009     | National Institute of Infectious Diseases (NIID) |
| EPI226142 | PB1 | Lao, People | 2009-Jul-17 | A/Laos/JP1388/2009     | National Institute of Infectious Diseases (NIID) |
| EPI226134 | PB1 | Lao, People | 2009-Jul-17 | A/Laos/JP1383/2009     | National Institute of Infectious Diseases (NIID) |
| EPI226126 | PB1 | Lao, People | 2009-Jul-13 | A/Laos/JP1375/2009     | National Institute of Infectious Diseases (NIID) |
| EPI226118 | PB1 | Lao, People | 2009-Jul-14 | A/Laos/JP1294/2009     | National Institute of Infectious Diseases (NIID) |
| EPI226110 | PB1 | Lao, People | 2009-Jul-14 | A/Laos/JP1291/2009     | National Institute of Infectious Diseases (NIID) |
| EPI226102 | PB1 | Lao, People | 2009-Jul-11 | A/Laos/JP1252/2009     | National Institute of Infectious Diseases (NIID) |
| EPI226094 | PB1 | Lao, People | 2009-Jul-11 | A/Laos/JP1251/2009     | National Institute of Infectious Diseases (NIID) |
| EPI226086 | PB1 | Lao, People | 2009-Jul-10 | A/Laos/JP1239/2009     | National Institute of Infectious Diseases (NIID) |
| EPI226078 | PB1 | Lao, People | 2009-Jul-09 | A/Laos/JP1157/2009     | National Institute of Infectious Diseases (NIID) |
| EPI226070 | PB1 | Lao, People | 2009-Jul-07 | A/Laos/JP1155/2009     | National Institute of Infectious Diseases (NIID) |
| EPI226062 | PB1 | Lao, People | 2009-Jul-03 | A/Laos/JP1139/2009     | National Institute of Infectious Diseases (NIID) |



Supplementary Table 1

|           |     |              |             |                        |                                     |                                                  |
|-----------|-----|--------------|-------------|------------------------|-------------------------------------|--------------------------------------------------|
| EPI226054 | PB1 | Lao, People  | 2009-Jul-02 | A/Laos/JP1121/2009     |                                     | National Institute of Infectious Diseases (NIID) |
| EPI226046 | PB1 | Lao, People  | 2009-Jun-22 | A/Laos/JP1079/2009     |                                     | National Institute of Infectious Diseases (NIID) |
| EPI226038 | PB1 | Lao, People  | 2009-Jun-21 | A/Laos/JP1074/2009     |                                     | National Institute of Infectious Diseases (NIID) |
| EPI226030 | PB1 | Lao, People  | 2009-Jun-15 | A/Laos/JP1057/2009     |                                     | National Institute of Infectious Diseases (NIID) |
| EPI226022 | PB1 | Japan        | 2009-Oct-29 | A/KUMAMOTO/161/2009    |                                     | National Institute of Infectious Diseases (NIID) |
| EPI226014 | PB1 | Japan        | 2009-Oct-13 | A/KOBE/92359/2009      |                                     | National Institute of Infectious Diseases (NIID) |
| EPI226006 | PB1 | Japan        | 2009-Aug-18 | A/KOBE/91993/2009      |                                     | National Institute of Infectious Diseases (NIID) |
| EPI225998 | PB1 | Japan        | 2009-Aug-17 | A/KOBE/91992/2009      |                                     | National Institute of Infectious Diseases (NIID) |
| EPI225990 | PB1 | Japan        | 2009-Jul-20 | A/KAWASAKI/105/2009    |                                     | National Institute of Infectious Diseases (NIID) |
| EPI225982 | PB1 | Japan        | 2009-Oct-30 | A/IWATE/1086/2009      |                                     | National Institute of Infectious Diseases (NIID) |
| EPI225974 | PB1 | Japan        | 2009-Sep-29 | A/HOKKAIDO/200/2009    |                                     | National Institute of Infectious Diseases (NIID) |
| EPI225966 | PB1 | Japan        | 2009-Oct-19 | A/HIROSHIMA/393/2009   |                                     | National Institute of Infectious Diseases (NIID) |
| EPI225958 | PB1 | Japan        | 2009-Sep-20 | A/HIROSHIMA/316/2009   |                                     | National Institute of Infectious Diseases (NIID) |
| EPI225950 | PB1 | Japan        | 2009-Sep-01 | A/HIROSHIMA/287/2009   |                                     | National Institute of Infectious Diseases (NIID) |
| EPI225942 | PB1 | Japan        | 2009-Aug-03 | A/HIROSHIMA/245/2009   |                                     | National Institute of Infectious Diseases (NIID) |
| EPI225934 | PB1 | Japan        | 2009-Jul-20 | A/HIROSHIMA/239/2009   |                                     | National Institute of Infectious Diseases (NIID) |
| EPI225926 | PB1 | Japan        | 2009-Jul-16 | A/HIROSHIMA-C/242/2009 |                                     | National Institute of Infectious Diseases (NIID) |
| EPI225918 | PB1 | Japan        | 2009-Aug-29 | A/HIMEJI/L1/2009       | Himeji City Institute of Environmen | National Institute of Infectious Diseases (NIID) |
| EPI225910 | PB1 | Japan        | 2009-Jul-14 | A/GUNMA/82/2009        |                                     | National Institute of Infectious Diseases (NIID) |
| EPI225902 | PB1 | Japan        | 2009-Jun-24 | A/GUNMA/52/2009        |                                     | National Institute of Infectious Diseases (NIID) |
| EPI225894 | PB1 | Japan        | 2009-Jun-29 | A/GIFU-C/65/2009       |                                     | National Institute of Infectious Diseases (NIID) |
| EPI225886 | PB1 | Japan        | 2009-Sep-27 | A/FUKUOKA-C/26/2009    |                                     | National Institute of Infectious Diseases (NIID) |
| EPI225878 | PB1 | Japan        | 2009-Jul-17 | A/FUKUI/73/2009        |                                     | National Institute of Infectious Diseases (NIID) |
| EPI225870 | PB1 | Japan        | 2009-Jul-04 | A/FUKUI/69/2009        |                                     | National Institute of Infectious Diseases (NIID) |
| EPI225862 | PB1 | Japan        | 2009-Jul-22 | A/CHIBA-C/62/2009      |                                     | National Institute of Infectious Diseases (NIID) |
| EPI225854 | PB1 | Japan        | 2009-Sep-28 | A/CHIBA-C/131/2009     |                                     | National Institute of Infectious Diseases (NIID) |
| EPI225846 | PB1 | Japan        | 2009-Jul-17 | A/AICHI/237/2009       |                                     | National Institute of Infectious Diseases (NIID) |
| EPI221223 | PB1 | United State | 2009-Sep-01 | A/Wisconsin/53/2009    | Wisconsin State Laboratory of Hygi  | Centers for Disease Control and Prevention       |
| EPI227898 | PB1 | United State | 2009-May-07 | A/Washington/51/2009   | Centers for Disease Control and Pre | Centers for Disease Control and Prevention       |
| EPI227743 | PB1 | United State | 2009-May-23 | A/New York/97/2009     | Centers for Disease Control and Pre | Centers for Disease Control and Prevention       |
| EPI227739 | PB1 | United State | 2009-Jan-01 | A/New York/96/2009     |                                     | Centers for Disease Control and Prevention       |
| EPI221042 | PB1 | Thailand     | 2009-Sep-11 | A/Thailand/2944/2009   | Thailand MOPH-U.S. CDC Collabora    | Centers for Disease Control and Prevention       |
| EPI221034 | PB1 | Philippines  | 2009-Jun-23 | A/Philippines/566/2009 | Thailand MOPH-U.S. CDC Collabora    | Centers for Disease Control and Prevention       |
| EPI221012 | PB1 | Nepal        | 2009-Aug-17 | A/Nepal/426/2009       | Thailand MOPH-U.S. CDC Collabora    | Centers for Disease Control and Prevention       |

Supplementary Table 1

|           |     |              |             |                          |                                     |                                            |
|-----------|-----|--------------|-------------|--------------------------|-------------------------------------|--------------------------------------------|
| EPI220970 | PB1 | Bhutan       | 2009-Aug-26 | A/Bhutan/739/2009        | Thailand MOPH-U.S. CDC Collabora    | Centers for Disease Control and Prevention |
| EPI217336 | PB1 | China        | 2009-Jun-11 | A/Tianjin/SWL4/2009      |                                     | WHO Chinese National Influenza Center      |
| EPI273623 | PB1 | United State | 2009-Sep-27 | A/Wisconsin/51/2009      | Wisconsin State Laboratory of Hygi  | Centers for Disease Control and Prevention |
| EPI217201 | PB1 | Uganda       | 2009-Aug-18 | A/Uganda/430/2009        | Uganda Virus Research Institute (U  | Centers for Disease Control and Prevention |
| EPI217183 | PB1 | United State | 2009-Oct-10 | A/Tennessee/18/2009      | Westchester County Department o     | Centers for Disease Control and Prevention |
| EPI217103 | PB1 | United State | 2009-Sep-16 | A/South Carolina/18/2009 | South Carolina Department of Heal   | Centers for Disease Control and Prevention |
| EPI217061 | PB1 | United State | 2009-Oct-15 | A/New York/102/2009      | Westchester County Department o     | Centers for Disease Control and Prevention |
| EPI221131 | PB1 | United State | 2009-Oct-04 | A/New York/101/2009      | Westchester County Department o     | Centers for Disease Control and Prevention |
| EPI217046 | PB1 | United State | 2009-Oct-02 | A/New Mexico/08/2009     | New Mexico Department of Health     | Centers for Disease Control and Prevention |
| EPI217040 | PB1 | United State | 2009-Oct-18 | A/New Mexico/07/2009     | New Mexico Department of Health     | Centers for Disease Control and Prevention |
| EPI217033 | PB1 | United State | 2009-Oct-10 | A/New Mexico/06/2009     | New Mexico Department of Health     | Centers for Disease Control and Prevention |
| EPI221106 | PB1 | United State | 2009-Sep-25 | A/Mississippi/03/2009    | Mississippi Public Health Laborator | Centers for Disease Control and Prevention |
| EPI216972 | PB1 | United State | 2009-Sep-15 | A/Massachusetts/31/2009  | Massachusetts Department of Publ    | Centers for Disease Control and Prevention |
| EPI216955 | PB1 | Kyrgyzstan   | 2009-Aug-18 | A/Kyrgyzstan/243/2009    | National Virology Laboratory, Cent  | Centers for Disease Control and Prevention |
| EPI216947 | PB1 | Kuwait       | 2009-May-21 | A/Kuwait/4536/2009       | U.S. Naval Medical Research Unit N  | Centers for Disease Control and Prevention |
| EPI216927 | PB1 | United State | 2009-Sep-23 | A/Kansas/23/2009         | Kansas Department of Health and E   | Centers for Disease Control and Prevention |
| EPI216919 | PB1 | United State | 2009-Sep-22 | A/Kansas/22/2009         | Kansas Department of Health and E   | Centers for Disease Control and Prevention |
| EPI216911 | PB1 | United State | 2009-Sep-16 | A/Kansas/21/2009         | Kansas Department of Health and E   | Centers for Disease Control and Prevention |
| EPI216903 | PB1 | United State | 2009-Sep-14 | A/Kansas/20/2009         | Kansas Department of Health and E   | Centers for Disease Control and Prevention |
| EPI216895 | PB1 | United State | 2009-Sep-14 | A/Kansas/19/2009         | Kansas Department of Health and E   | Centers for Disease Control and Prevention |
| EPI216835 | PB1 | El Salvador  | 2009-Jul-16 | A/El Salvador/1644/2009  | Contiguo a Hospital Rosales         | Centers for Disease Control and Prevention |
| EPI216828 | PB1 | El Salvador  | 2009-Jul-14 | A/El Salvador/1553/2009  | Contiguo a Hospital Rosales         | Centers for Disease Control and Prevention |
| EPI216820 | PB1 | El Salvador  | 2009-Jul-14 | A/El Salvador/1553/2009  | Contiguo a Hospital Rosales         | Centers for Disease Control and Prevention |
| EPI216812 | PB1 | El Salvador  | 2009-Jul-09 | A/El Salvador/1414/2009  | Contiguo a Hospital Rosales         | Centers for Disease Control and Prevention |
| EPI216804 | PB1 | El Salvador  | 2009-Jun-30 | A/El Salvador/1123/2009  | Contiguo a Hospital Rosales         | Centers for Disease Control and Prevention |
| EPI216796 | PB1 | Egypt        | 2009-Jun-24 | A/Egypt/6194/2009        | U.S. Naval Medical Research Unit N  | Centers for Disease Control and Prevention |
| EPI216773 | PB1 | Costa Rica   | 2009-Jul-22 | A/Costa Rica/4635/2009   | Laboratorio Nacional de Influenza   | Centers for Disease Control and Prevention |
| EPI216765 | PB1 | Costa Rica   | 2009-Jul-17 | A/Costa Rica/3896/2009   | Laboratorio Nacional de Influenza   | Centers for Disease Control and Prevention |
| EPI216713 | PB1 | Argentina    | 2009-Jun-26 | A/Argentina/4623/2009    | CEMIC University Hospital           | Centers for Disease Control and Prevention |
| EPI216706 | PB1 | United State | 2009-Sep-11 | A/Alaska/38/2009         | Alaska State Virology Lab           | Centers for Disease Control and Prevention |
| EPI216690 | PB1 | China        | 2009-Jun-02 | A/Fujian/SWL11/2009      |                                     | WHO Chinese National Influenza Center      |
| EPI216682 | PB1 | China        | 2009-Jun-02 | A/Fujian/SWL10/2009      |                                     | WHO Chinese National Influenza Center      |
| EPI216674 | PB1 | China        | 2009-Jun-02 | A/Fujian/SWL9/2009       |                                     | WHO Chinese National Influenza Center      |
| EPI216666 | PB1 | China        | 2009-Jun-02 | A/Fujian/SWL8/2009       |                                     | WHO Chinese National Influenza Center      |

Supplementary Table 1

|           |     |                         |             |                           |                                              |                                                                  |
|-----------|-----|-------------------------|-------------|---------------------------|----------------------------------------------|------------------------------------------------------------------|
| EPI216658 | PB1 | China                   | 2009-Jun-02 | A/Fujian/SWL7/2009        |                                              | WHO Chinese National Influenza Center                            |
| EPI216650 | PB1 | China                   | 2009-May-31 | A/Fujian/SWL6/2009        |                                              | WHO Chinese National Influenza Center                            |
| EPI216642 | PB1 | China                   | 2009-May-30 | A/Beijing/SWL5/2009       |                                              | WHO Chinese National Influenza Center                            |
| EPI216634 | PB1 | China                   | 2009-May-28 | A/Guangdong/SWL4/2009     |                                              | WHO Chinese National Influenza Center                            |
| EPI216626 | PB1 | China                   | 2009-May-28 | A/Guangdong/SWL3/2009     |                                              | WHO Chinese National Influenza Center                            |
| EPI216618 | PB1 | China                   | 2009-May-26 | A/Shanghai/SWL3/2009      |                                              | WHO Chinese National Influenza Center                            |
| EPI216610 | PB1 | China                   | 2009-May-27 | A/Shanghai/SWL2/2009      |                                              | WHO Chinese National Influenza Center                            |
| EPI216602 | PB1 | China                   | 2009-May-30 | A/Fujian/SWL5/2009        |                                              | WHO Chinese National Influenza Center                            |
| EPI216591 | PB1 | China                   | 2009-Jun-22 | A/Fujian/SWL4/2009        |                                              | WHO Chinese National Influenza Center                            |
| EPI216583 | PB1 | China                   | 2009-May-29 | A/Fujian/SWL3/2009        |                                              | WHO Chinese National Influenza Center                            |
| EPI216575 | PB1 | China                   | 2009-May-27 | A/Fujian/SWL2/2009        |                                              | WHO Chinese National Influenza Center                            |
| EPI284426 | PB1 | Australia               | 2009-May-27 | A/BRISBANE/2011/2009      | Queensland Health Scientific Service         | WHO Collaborating Centre for Reference and Research on Influenza |
| EPI270021 | PB1 | Australia               | 2009-Aug-07 | A/PERTH/267/2009          | Pathwest QE II Medical Centre                | WHO Collaborating Centre for Reference and Research on Influenza |
| EPI270053 | PB1 | Australia               | 2009-Jul-24 | A/PERTH/265/2009          | Pathwest QE II Medical Centre                | WHO Collaborating Centre for Reference and Research on Influenza |
| EPI215713 | PB1 | Australia               | 2009-Jul-12 | A/SYDNEY/2503/2009        | Royal Prince Alfred Hospital                 | WHO Collaborating Centre for Reference and Research on Influenza |
| EPI215698 | PB1 | Australia               | 2009-Jun-17 | A/VICTORIA/3036/2009      | Victorian Infectious Diseases Reference Unit | WHO Collaborating Centre for Reference and Research on Influenza |
| EPI244245 | PB1 | China                   | 2009-Jul-16 | A/Fujian-Gulou/1896/2009  |                                              | Centers for Disease Control and Prevention                       |
| EPI266833 | PB1 | China                   | 2009-May-27 | A/Fujian-Gulou/1581/2009  |                                              | Centers for Disease Control and Prevention                       |
| EPI266919 | PB1 | United States           | 2009-Aug-12 | A/Texas/57/2009           | Texas Department of State Health Services    | Centers for Disease Control and Prevention                       |
| EPI221270 | PB1 | United States           | 2009-Aug-09 | A/Oregon/30/2009          | Oregon Public Health Laboratory              | Centers for Disease Control and Prevention                       |
| EPI211521 | PB1 | United States           | 2009-Aug-09 | A/Wyoming/08/2009         | Wyoming Public Health Laboratory             | Centers for Disease Control and Prevention                       |
| EPI211502 | PB1 | United States           | 2009-Jul-25 | A/Utah/20/2009            | Utah Department of Health                    | Centers for Disease Control and Prevention                       |
| EPI211494 | PB1 | United States           | 2009-Jun-26 | A/Texas/48/2009           | Texas Department of State Health Services    | Centers for Disease Control and Prevention                       |
| EPI211457 | PB1 | United States           | 2009-May-13 | A/Mississippi/01/2009     | Mississippi Public Health Laboratory         | Centers for Disease Control and Prevention                       |
| EPI211444 | PB1 | United States           | 2009-Jun-15 | A/Massachusetts/16/2009   | Massachusetts Department of Public Health    | Centers for Disease Control and Prevention                       |
| EPI211406 | PB1 | Chile                   | 2009-Jun-15 | A/Chile/6536/2009         | Instituto de Salud Publica de Chile          | Centers for Disease Control and Prevention                       |
| EPI266884 | PB1 | China                   | 2009-Jul-06 | A/Hunan-Changning/52/2009 |                                              | Centers for Disease Control and Prevention                       |
| EPI266879 | PB1 | China                   | 2009-Jul-10 | A/Hong Kong/4508/2009     | Government Virus Unit                        | Centers for Disease Control and Prevention                       |
| EPI194269 | PB1 | Uruguay                 | 2009-Jul-22 | A/Uruguay/755/2009        | Departamento de Laboratorio de Salud Publica | Centers for Disease Control and Prevention                       |
| EPI194253 | PB1 | Tanzania, United States | 2009-Jul-01 | A/Tanzania/88/2009        |                                              | Centers for Disease Control and Prevention                       |
| EPI194244 | PB1 | Seychelles              | 2009-Jul-02 | A/Seychelles/106/2009     | CDC-Kenya                                    | Centers for Disease Control and Prevention                       |
| EPI194238 | PB1 | United States           | 2009-Jul-13 | A/Rhode Island/08/2009    | Rhode Island Department of Health            | Centers for Disease Control and Prevention                       |
| EPI194231 | PB1 | United States           | 2009-Jul-01 | A/Rhode Island/07/2009    | Rhode Island Department of Health            | Centers for Disease Control and Prevention                       |
| EPI194182 | PB1 | Kenya                   | 2009-Jul-07 | A/Kenya/126/2009          | CDC-Kenya                                    | Centers for Disease Control and Prevention                       |

Supplementary Table 1

|           |     |                |             |                                 |                                      |                                            |
|-----------|-----|----------------|-------------|---------------------------------|--------------------------------------|--------------------------------------------|
| EPI194172 | PB1 | Iraq           | 2009-Jun-25 | A/Iraq/10249/2009               | U.S. Air Force School of Aerospace   | Centers for Disease Control and Prevention |
| EPI194165 | PB1 | Iraq           | 2009-Jun-25 | A/Iraq/0251/2009                | U.S. Air Force School of Aerospace   | Centers for Disease Control and Prevention |
| EPI221088 | PB1 | United States  | 2009-Jul-01 | A/Indiana/17/2009               |                                      | Centers for Disease Control and Prevention |
| EPI194150 | PB1 | United States  | 2009-Jul-06 | A/Georgia/08/2009               | Georgia Public Health Laboratory     | Centers for Disease Control and Prevention |
| EPI194124 | PB1 | Brazil         | 2009-Jul-01 | A/Brazil/764/2009               | National Influenza Center            | Centers for Disease Control and Prevention |
| EPI221046 | PB1 | Uganda         | 2009-Jul-01 | A/Uganda/07/2009                |                                      | Centers for Disease Control and Prevention |
| EPI227859 | PB1 | United States  | 2009-Jun-12 | A/Utah/06/2009                  | Utah Public Health Laboratory        | Centers for Disease Control and Prevention |
| EPI191963 | PB1 | Singapore      | 2009-Jun-22 | A/Singapore/93/2009             | Singapore General Hospital           | Centers for Disease Control and Prevention |
| EPI221087 | PB1 | United States  | 2009-Jun-13 | A/Illinois/07/2009              | Illinois Department of Public Health | Centers for Disease Control and Prevention |
| EPI191956 | PB1 | Argentina      | 2009-Jun-17 | A/Argentina/7768/2009           | Instituto Nacional de Enfermedades   | Centers for Disease Control and Prevention |
| EPI191950 | PB1 | Honduras       | 2009-Jun-17 | A/Honduras/2039/2009            | Laboratorio Nacional de Virologia    | Centers for Disease Control and Prevention |
| EPI191941 | PB1 | Cote d'Ivoire  | 2009-Jun-16 | A/Cote d'Ivoire/709/2009        | Pasteur Institut of Côte d'Ivoire    | Centers for Disease Control and Prevention |
| EPI194286 | PB1 | United States  | 2009-Jul-14 | A/Washington/29/2009            |                                      | Centers for Disease Control and Prevention |
| EPI194283 | PB1 | United States  | 2009-Jul-14 | A/Washington/28/2009            |                                      | Centers for Disease Control and Prevention |
| EPI266914 | PB1 | United States  | 2009-Feb-08 | A/Texas/38/2009                 | Texas Childrens Hospital             | Centers for Disease Control and Prevention |
| EPI266929 | PB1 | United States  | 2009-Mar-18 | A/West Virginia/02/2009         | West Virginia Office of Laboratory   | Centers for Disease Control and Prevention |
| EPI266844 | PB1 | China          | 2009-Mar-13 | A/Guangdong-Zhuangzuyaozuzhi/51 | WHO Chinese National Influenza Ce    | Centers for Disease Control and Prevention |
| EPI266904 | PB1 | China          | 2009-Mar-23 | A/Liaoning-Huanggu/1144/2009    | WHO Chinese National Influenza Ce    | Centers for Disease Control and Prevention |
| EPI266894 | PB1 | United States  | 2009-May-12 | A/Kentucky/08/2009              | Kentucky Division of Laboratory Se   | Centers for Disease Control and Prevention |
| EPI189203 | PB1 | United States  | 2009-Jun-14 | A/Utah/11/2009                  |                                      | Centers for Disease Control and Prevention |
| EPI189191 | PB1 | United States  | 2009-Jun-14 | A/Utah/05/2009                  |                                      | Centers for Disease Control and Prevention |
| EPI189175 | PB1 | Suriname       | 2009-Jun-09 | A/Surinam/02/2009               | National Influenza Center French G   | Centers for Disease Control and Prevention |
| EPI189166 | PB1 | Singapore      | 2009-Jun-17 | A/Singapore/91/2009             | Singapore General Hospital           | Centers for Disease Control and Prevention |
| EPI189125 | PB1 | Kenya          | 2009-Jun-26 | A/Kenya/18/2009                 | CDC-Kenya                            | Centers for Disease Control and Prevention |
| EPI189115 | PB1 | Ethiopia       | 2009-Jun-25 | A/Ethiopia/16/2009              | CDC-Kenya                            | Centers for Disease Control and Prevention |
| EPI189110 | PB1 | Chile          | 2009-May-19 | A/Chile/8976/2009               | Instituto de Salud Publica de Chile  | Centers for Disease Control and Prevention |
| EPI189108 | PB1 | Chile          | 2009-May-18 | A/Chile/8949/2009               | Instituto de Salud Publica de Chile  | Centers for Disease Control and Prevention |
| EPI189105 | PB1 | Chile          | 2009-May-17 | A/Chile/8945/2009               | Instituto de Salud Publica de Chile  | Centers for Disease Control and Prevention |
| EPI189103 | PB1 | Chile          | 2009-May-30 | A/Chile/867/2009                | Instituto de Salud Publica de Chile  | Centers for Disease Control and Prevention |
| EPI189100 | PB1 | Chile          | 2009-Jun-01 | A/Chile/1175/2009               | Instituto de Salud Publica de Chile  | Centers for Disease Control and Prevention |
| EPI189078 | PB1 | Argentina      | 2009-Jun-18 | A/Argentina/7953/2009           | Instituto Nacional de Enfermedades   | Centers for Disease Control and Prevention |
| EPI186498 | PB1 | United Kingdom | 2009-Apr-27 | A/England/197/2009              |                                      | Health Protection Agency (HPA)             |
| EPI186490 | PB1 | United Kingdom | 2009-Apr-27 | A/England/196/2009              |                                      | Health Protection Agency (HPA)             |
| EPI186482 | PB1 | United Kingdom | 2009-Apr-29 | A/England/223/2009              |                                      | Health Protection Agency (HPA)             |

Supplementary Table 1

|           |     |               |             |                                    |                                     |                                                      |
|-----------|-----|---------------|-------------|------------------------------------|-------------------------------------|------------------------------------------------------|
| EPI186474 | PB1 | United King   | 2009-May-02 | A/England/221/2009                 |                                     | Health Protection Agency (HPA)                       |
| EPI186466 | PB1 | United King   | 2009-May-02 | A/England/220/2009                 |                                     | Health Protection Agency (HPA)                       |
| EPI186458 | PB1 | United King   | 2009-May-02 | A/England/219/2009                 |                                     | Health Protection Agency (HPA)                       |
| EPI186450 | PB1 | United King   | 2009-Apr-30 | A/England/217/2009                 |                                     | Health Protection Agency (HPA)                       |
| EPI186442 | PB1 | United King   | 2009-Apr-30 | A/England/216/2009                 |                                     | Health Protection Agency (HPA)                       |
| EPI186434 | PB1 | United King   | 2009-Apr-30 | A/England/215/2009                 |                                     | Health Protection Agency (HPA)                       |
| EPI186426 | PB1 | United King   | 2009-Apr-30 | A/England/214/2009                 |                                     | Health Protection Agency (HPA)                       |
| EPI186418 | PB1 | United King   | 2009-Apr-29 | A/England/213/2009                 |                                     | Health Protection Agency (HPA)                       |
| EPI186410 | PB1 | United King   | 2009-Apr-28 | A/England/211/2009                 |                                     | Health Protection Agency (HPA)                       |
| EPI186402 | PB1 | United King   | 2009-May-02 | A/England/201/2009                 |                                     | Health Protection Agency (HPA)                       |
| EPI186374 | PB1 | Taiwan        | 2009-Jan-01 | A/Taiwan/126/2009                  |                                     | Lin-Kou Chang-Gung Memorial Hospital                 |
| EPI186372 | PB1 | Singapore     | 2009-Jun-01 | A/Singapore/ON134/2009             | Ministry of Health                  | National Public Health Laboratory                    |
| EPI186369 | PB1 | Singapore     | 2009-Jun-05 | A/Singapore/ON144/2009             | Ministry of Health                  | National Public Health Laboratory                    |
| EPI186352 | PB1 | Singapore     | 2009-Jun-06 | A/Singapore/ON145/2009             | Ministry of Health                  | National Public Health Laboratory                    |
| EPI186279 | PB1 | Mexico        | 2009-Apr-20 | A/Mexico/4635/2009                 | Laboratorio de Virus Respiratorio   | Centers for Disease Control and Prevention           |
| EPI186272 | PB1 | Barbados      | 2009-Jun-17 | A/Barbados/5211/2009               | Caribbean Epidemiology Center       | Centers for Disease Control and Prevention           |
| EPI220979 | PB1 | British Virgi | 2009-Jun-15 | A/British Virgin Islands/5437/2009 | Caribbean Epidemiology Center       | Centers for Disease Control and Prevention           |
| EPI220966 | PB1 | Bermuda       | 2009-Jun-03 | A/Bermuda/4287/2009                | Caribbean Epidemiology Center       | Centers for Disease Control and Prevention           |
| EPI221004 | PB1 | Jamaica       | 2009-Jun-06 | A/Jamaica/4423/2009                | Caribbean Epidemiology Center       | Centers for Disease Control and Prevention           |
| EPI186264 | PB1 | Chile         | 2009-Jun-08 | A/Chile/2407/2009                  | Instituto de Salud Publica de Chile | Centers for Disease Control and Prevention           |
| EPI221005 | PB1 | Japan         | 2009-Jan-01 | A/Amagasaki/1/2009                 |                                     | Centers for Disease Control and Prevention           |
| EPI221019 | PB1 | Netherlands   | 2009-Jan-01 | A/Netherlands/604/2009             | Erasmus University of Rotterdam     | Centers for Disease Control and Prevention           |
| EPI221018 | PB1 | Netherlands   | 2009-Jan-01 | A/Netherlands/603/2009             | Erasmus University of Rotterdam     | Centers for Disease Control and Prevention           |
| EPI183298 | PB1 | Dominican R   | 2009-Apr-30 | A/Dominican Republic/807/2009      | Laboratorio de Investigacion / Cent | Centers for Disease Control and Prevention           |
| EPI221025 | PB1 | Paraguay      | 2009-May-20 | A/Paraguay/09/2009                 | Central Laboratory of Public Health | Centers for Disease Control and Prevention           |
| EPI243858 | PB1 | Panama        | 2009-May-11 | A/Panama/302869/2009               | Instituto Conmemorativo Gorgas d    | Centers for Disease Control and Prevention           |
| EPI220999 | PB1 | Honduras      | 2009-May-12 | A/Honduras/327/2009                | Laboratorio Nacional de Virologia   | Centers for Disease Control and Prevention           |
| EPI220993 | PB1 | El Salvador   | 2009-May-13 | A/El Salvador/351/2009             | Contiguo a Hospital Rosales         | Centers for Disease Control and Prevention           |
| EPI220989 | PB1 | Ecuador       | 2009-May-11 | A/Ecuador/752/2009                 | Instituto Nacional de Higiene y Med | Centers for Disease Control and Prevention           |
| EPI181859 | PB1 | China         | 2009-May-27 | A/Guangdong/2/2009                 |                                     | WHO Chinese National Influenza Center                |
| EPI220986 | PB1 | Costa Rica    | 2009-Apr-28 | A/Costa Rica/4314/2009             | Laboratorio Nacional de Influenza   | Centers for Disease Control and Prevention           |
| EPI181737 | PB1 | Colombia      | 2009-May-02 | A/Colombia/330/2009                | Instituto Nacional de Salud de Colu | Centers for Disease Control and Prevention           |
| EPI181375 | PB1 | Hong Kong     | 2009-Apr-30 | A/Hong Kong/01/2009                | Queen Mary Hospital                 | State Key Laboratory of Emerging Infectious Diseases |
| EPI181366 | PB1 | United King   | 2009-Apr-30 | A/England/200/2009                 | Health Protection Agency (HPA)      | Centre for Infections, Health Protection Agency      |

Supplementary Table 1

|           |     |              |             |                                                  |                                     |                                                     |
|-----------|-----|--------------|-------------|--------------------------------------------------|-------------------------------------|-----------------------------------------------------|
| EPI181358 | PB1 | United King  | 2009-Apr-30 | A/England/207/2009                               | Health Protection Agency (HPA)      | Centre for Infections, Health Protection Agency     |
| EPI186344 | PB1 | Singapore    | 2009-May-28 | A/Singapore/ON126/2009                           |                                     | National Public Health Laboratory                   |
| EPI180635 | PB1 | China        | 2009-May-18 | A/Guangdong/1/2009                               |                                     | WHO Chinese National Influenza Center               |
| EPI179078 | PB1 | El Salvador  | 2009-Apr-26 | A/El Salvador/213/2009                           | Contiguo a Hospital Rosales         | Centers for Disease Control and Prevention          |
| EPI291824 | PB1 | United State | 2007-Aug-19 | A/Michigan/09/2007                               | Michigan Department of Communi      | Centers for Disease Control and Prevention          |
| EPI291907 | PB1 | United State | 2007-Aug-17 | A/Ohio/02/2007                                   | Ohio Department of Health Labora    | Centers for Disease Control and Prevention          |
| EPI291859 | PB1 | United State | 2007-Aug-17 | A/Ohio/01/2007                                   | Ohio Department of Health Labora    | Centers for Disease Control and Prevention          |
| EPI291901 | PB1 | United State | 2005-Dec-08 | A/Wisconsin/87/2005                              | Wisconsin State Laboratory of Hygi  | Centers for Disease Control and Prevention          |
| EPI179500 | PB1 | Germany      | 2009-Apr-29 | A/Regensburg/Germany/02/2009                     |                                     | University of Regensburg                            |
| EPI176485 | PB1 | United State | 2009-Apr-01 | A/California/04/2009                             |                                     | Centers for Disease Control and Prevention          |
| EPI164769 | PB1 | Indonesia    | 2008-Jan-01 | A/Indonesia/7272/2008                            | Ministry of Health, NIHRD           | Eijkman Institute for Molecular Biology             |
| EPI164761 | PB1 | Indonesia    | 2008-Jan-01 | A/Indonesia/7379/2008                            | Ministry of Health, NIHRD           | Eijkman Institute for Molecular Biology             |
| EPI164238 | PB1 | China        | 2006-Jan-17 | A/Sichuan/2/2006                                 |                                     | WHO Chinese National Influenza Center               |
| EPI164214 | PB1 | Indonesia    | 2008-May-08 | A/Indonesia/8228/2008                            | Ministry of Health, NIHRD           | Eijkman Institute for Molecular Biology             |
| EPI163117 | PB1 | Indonesia    | 2008-Jan-16 | A/Indonesia/7261/2008                            | Ministry of Health, NIHRD           | Eijkman Institute for Molecular Biology             |
| EPI223121 | PB1 | Afghanistan  | 2009-Jan-01 | A/chicken/Afghanistan/329-8vir09-AFG-Heart7/2009 |                                     | Istituto Zooprofilattico Sperimentale Delle Venezia |
| EPI223113 | PB1 | Afghanistan  | 2009-Jan-01 | A/chicken/Afghanistan/329-7vir09-AFG-Heart6/2009 |                                     | Istituto Zooprofilattico Sperimentale Delle Venezia |
| EPI223105 | PB1 | Afghanistan  | 2008-Jan-01 | A/chicken/Afghanistan/329-6vir09-AFG-Khost9/2008 |                                     | Istituto Zooprofilattico Sperimentale Delle Venezia |
| EPI223097 | PB1 | Afghanistan  | 2008-Jan-01 | A/chicken/Afghanistan/329-5vir09-AFG-Khost4/2008 |                                     | Istituto Zooprofilattico Sperimentale Delle Venezia |
| EPI223089 | PB1 | Afghanistan  | 2008-Jan-01 | A/chicken/Afghanistan/329-4vir09-AFG-Khost3/2008 |                                     | Istituto Zooprofilattico Sperimentale Delle Venezia |
| EPI223081 | PB1 | Afghanistan  | 2008-Jan-01 | A/chicken/Afghanistan/329-3vir09-AFG-Khost2/2008 |                                     | Istituto Zooprofilattico Sperimentale Delle Venezia |
| EPI223073 | PB1 | Afghanistan  | 2008-Jan-01 | A/chicken/Afghanistan/329-2vir09-AFG-Khost1/2008 |                                     | Istituto Zooprofilattico Sperimentale Delle Venezia |
| EPI210063 | PB1 | Russian Fed  | 2006-Mar-01 | A/chicken/Adygea/203/06                          | Federal Centre for Animal Health (A | Istituto Zooprofilattico Sperimentale Delle Venezia |
| EPI210049 | PB1 | Russian Fed  | 2006-Mar-01 | A/chicken/Krasnodar/199/06                       | Federal Centre for Animal Health (A | Istituto Zooprofilattico Sperimentale Delle Venezia |
| EPI210041 | PB1 | Russian Fed  | 2007-Dec-01 | A/chicken/Rostov/864/07                          | Federal Centre for Animal Health (A | Istituto Zooprofilattico Sperimentale Delle Venezia |
| EPI210015 | PB1 | Russian Fed  | 2006-Mar-01 | A/chicken/Volgograd/236/06                       | Federal Centre for Animal Health (A | Istituto Zooprofilattico Sperimentale Delle Venezia |
| EPI210007 | PB1 | Russian Fed  | 2007-Sep-01 | A/chicken/Krasnodar/776/2007                     | Federal Centre for Animal Health (A | Istituto Zooprofilattico Sperimentale Delle Venezia |
| EPI164753 | PB1 | China        | 2004-Jan-01 | A/Chicken/Anhui/39/2004                          | Harbin Veterinary Research Institut | Harbin Veterinary Research Institute                |
| EPI164737 | PB1 | China        | 2004-Jan-01 | A/Chicken/Jiangxi/25/2004                        | Harbin Veterinary Research Institut | Harbin Veterinary Research Institute                |
| EPI160533 | PB1 | Vietnam      | 2007-Jul-01 | A/chicken/Vietnam/NCVD-74/07                     |                                     | Centers for Disease Control and Prevention          |
| EPI159882 | PB1 | Egypt        | 2007-Dec-18 | A/chicken/Egypt/1709-8VIR08/2007                 |                                     | Istituto Zooprofilattico Sperimentale Delle Venezia |
| EPI156803 | PB1 | Poland       | 2007-Dec-04 | A/chicken/Poland/38-140V08/2007                  |                                     | National Veterinary Research Institute              |
| EPI156770 | PB1 | Egypt        | 2007-Jun-01 | A/chicken/Egypt/5169-3/2007                      |                                     | Istituto Zooprofilattico Sperimentale Delle Venezia |
| EPI156762 | PB1 | Togo         | 2007-Jan-01 | A/chicken/Togo/4106-4/2007                       |                                     | Istituto Zooprofilattico Sperimentale Delle Venezia |

Supplementary Table 1

|           |     |              |             |                                     |                                       |                                                                             |
|-----------|-----|--------------|-------------|-------------------------------------|---------------------------------------|-----------------------------------------------------------------------------|
| EPI154953 | PB1 | Egypt        | 2007-Jan-01 | A/chicken/Egitto/2628-1/2007        |                                       | Istituto Zooprofilattico Sperimentale Delle Venezie                         |
| EPI154916 | PB1 | Egypt        | 2007-Jan-01 | A/chicken/Egypt/1709-2/2008         |                                       | Istituto Zooprofilattico Sperimentale Delle Venezie                         |
| EPI154527 | PB1 | Saudi Arabia | 2007-Jan-01 | A/chicken/Saudi Arabia/6732-18/2007 |                                       | Istituto Zooprofilattico Sperimentale Delle Venezie                         |
| EPI154519 | PB1 | Saudi Arabia | 2007-Jan-01 | A/chicken/Saudi Arabia/6732-13/2007 |                                       | Istituto Zooprofilattico Sperimentale Delle Venezie                         |
| EPI154503 | PB1 | Saudi Arabia | 2007-Jan-01 | A/chicken/Saudi Arabia/6732-4/2007  |                                       | Istituto Zooprofilattico Sperimentale Delle Venezie                         |
| EPI152046 | PB1 | Egypt        | 2007-Jan-01 | A/chicken/Egypt/5169-2/2007         |                                       | Istituto Zooprofilattico Sperimentale Delle Venezie                         |
| EPI223059 | PB1 | Hungary      | 2006-Jan-01 | A/duck/Hungary/11804/2006           | Central Veterinary Institute Budapest | Veterinary and Agrochemical Research Institute                              |
| EPI186398 | PB1 | Germany      | 2008-Jan-01 | A/duck/Germany/R854/2008            |                                       | Friedrich-Loeffler-Institut                                                 |
| EPI178541 | PB1 | Italy        | 2007-Jan-01 | A/Duck/Italy/60772/2007             |                                       | Istituto Zooprofilattico Sperimentale della Lombardia e dell'Emilia-Romagna |
| EPI178534 | PB1 | Italy        | 2006-Jan-01 | A/Duck/Italy/62330/2006             |                                       | Istituto Zooprofilattico Sperimentale della Lombardia e dell'Emilia-Romagna |
| EPI178499 | PB1 | Italy        | 2004-Jan-01 | A/Duck/Italy/268302/2004            |                                       | Istituto Zooprofilattico Sperimentale della Lombardia e dell'Emilia-Romagna |
| EPI174781 | PB1 | Italy        | 2006-Jan-01 | A/duck/Italy/73383/2006             |                                       | Istituto Zooprofilattico Sperimentale della Lombardia e dell'Emilia-Romagna |
| EPI169308 | PB1 | France       | 2007-Feb-16 | A/duck/France/070090b/2007          |                                       | AFSSA                                                                       |
| EPI169300 | PB1 | France       | 2006-Mar-30 | A/duck/France/06436/2006            |                                       | AFSSA                                                                       |
| EPI169291 | PB1 | France       | 2005-Feb-03 | A/duck/France/05057b/2005           |                                       | AFSSA                                                                       |
| EPI164745 | PB1 | China        | 2004-Jan-01 | A/Duck/Hunnan/70/2004               | Harbin Veterinary Research Institute  | Harbin Veterinary Research Institute                                        |
| EPI164200 | PB1 | Vietnam      | 2007-Jul-01 | A/muscovy duck/Vietnam/NCVD-69/2007 |                                       | Centers for Disease Control and Prevention                                  |
| EPI164192 | PB1 | Vietnam      | 2007-Jul-01 | A/muscovy duck/Vietnam/NCVD-67/2007 |                                       | Centers for Disease Control and Prevention                                  |
| EPI164184 | PB1 | Vietnam      | 2007-Jul-01 | A/muscovy duck/Vietnam/NCVD-66/2007 |                                       | Centers for Disease Control and Prevention                                  |
| EPI164176 | PB1 | Vietnam      | 2007-Jul-01 | A/muscovy duck/Vietnam/NCVD-52/2007 |                                       | Centers for Disease Control and Prevention                                  |
| EPI164168 | PB1 | Vietnam      | 2007-Jul-01 | A/muscovy duck/Vietnam/NCVD-51/2007 |                                       | Centers for Disease Control and Prevention                                  |
| EPI164160 | PB1 | Vietnam      | 2007-Jul-01 | A/muscovy duck/Vietnam/NCVD-47/2007 |                                       | Centers for Disease Control and Prevention                                  |
| EPI161704 | PB1 | Nigeria      | 2008-Jan-01 | A/duck/Nigeria/3724-2/2008          |                                       | Istituto Zooprofilattico Sperimentale Delle Venezie                         |
| EPI160614 | PB1 | Vietnam      | 2007-Jul-01 | A/duck/Vietnam/NCVD-82/07           |                                       | Centers for Disease Control and Prevention                                  |
| EPI160549 | PB1 | Vietnam      | 2007-Jul-01 | A/duck/Vietnam/NCVD-81/07           |                                       | Centers for Disease Control and Prevention                                  |
| EPI160541 | PB1 | Vietnam      | 2007-Jul-01 | A/duck/Vietnam/NCVD-76/07           |                                       | Centers for Disease Control and Prevention                                  |
| EPI160525 | PB1 | Vietnam      | 2007-Jul-01 | A/duck/Vietnam/NCVD-71/07           |                                       | Centers for Disease Control and Prevention                                  |
| EPI160517 | PB1 | Vietnam      | 2007-Jul-01 | A/duck/Vietnam/NCVD-70/07           |                                       | Centers for Disease Control and Prevention                                  |
| EPI160509 | PB1 | Vietnam      | 2007-Jul-01 | A/duck/Vietnam/NCVD-68/07           |                                       | Centers for Disease Control and Prevention                                  |
| EPI160501 | PB1 | Vietnam      | 2007-Jul-01 | A/duck/Vietnam/NCVD-65/07           |                                       | Centers for Disease Control and Prevention                                  |
| EPI160493 | PB1 | Vietnam      | 2007-Jul-01 | A/duck/Vietnam/NCVD-64/07           |                                       | Centers for Disease Control and Prevention                                  |
| EPI160485 | PB1 | Vietnam      | 2007-Jul-01 | A/duck/Vietnam/NCVD-63/07           |                                       | Centers for Disease Control and Prevention                                  |
| EPI160477 | PB1 | Vietnam      | 2007-Jul-01 | A/duck/Vietnam/NCVD-62/07           |                                       | Centers for Disease Control and Prevention                                  |
| EPI160469 | PB1 | Vietnam      | 2007-Jul-01 | A/duck/Vietnam/NCVD-61/07           |                                       | Centers for Disease Control and Prevention                                  |

Supplementary Table 1

|           |     |              |             |                                         |                                       |                                                                  |
|-----------|-----|--------------|-------------|-----------------------------------------|---------------------------------------|------------------------------------------------------------------|
| EPI160461 | PB1 | Vietnam      | 2007-Jul-01 | A/duck/Vietnam/NCVD-60/07               |                                       | Centers for Disease Control and Prevention                       |
| EPI160453 | PB1 | Vietnam      | 2007-Jul-01 | A/duck/Vietnam/NCVD-59/07               |                                       | Centers for Disease Control and Prevention                       |
| EPI160445 | PB1 | Vietnam      | 2007-Jul-01 | A/duck/Vietnam/NCVD-58/07               |                                       | Centers for Disease Control and Prevention                       |
| EPI160437 | PB1 | Vietnam      | 2007-Jul-01 | A/duck/Vietnam/NCVD-57/07               |                                       | Centers for Disease Control and Prevention                       |
| EPI160429 | PB1 | Vietnam      | 2007-Jul-01 | A/duck/Vietnam/NCVD-56/07               |                                       | Centers for Disease Control and Prevention                       |
| EPI160421 | PB1 | Vietnam      | 2007-Jul-01 | A/duck/Vietnam/NCVD-55/07               |                                       | Centers for Disease Control and Prevention                       |
| EPI160413 | PB1 | Vietnam      | 2007-Jul-01 | A/duck/Vietnam/NCVD-54/07               |                                       | Centers for Disease Control and Prevention                       |
| EPI160405 | PB1 | Vietnam      | 2007-Jul-01 | A/duck/Vietnam/NCVD-53/07               |                                       | Centers for Disease Control and Prevention                       |
| EPI160397 | PB1 | Vietnam      | 2007-Jul-01 | A/duck/Vietnam/NCVD-50/07               |                                       | Centers for Disease Control and Prevention                       |
| EPI160389 | PB1 | Vietnam      | 2007-Jul-01 | A/duck/Vietnam/NCVD-49/07               |                                       | Centers for Disease Control and Prevention                       |
| EPI160381 | PB1 | Vietnam      | 2007-Jul-01 | A/duck/Vietnam/NCVD-48/07               |                                       | Centers for Disease Control and Prevention                       |
| EPI156778 | PB1 | Egypt        | 2007-Feb-01 | A/duck/Egypt/5169-4/2007                |                                       | Istituto Zooprofilattico Sperimentale Delle Veneziae             |
| EPI156733 | PB1 | Egypt        | 2007-Nov-01 | A/duck/Egypt/452-1VIR07/2006            |                                       | Istituto Zooprofilattico Sperimentale Delle Veneziae             |
| EPI154511 | PB1 | Saudi Arabia | 2007-Jan-01 | A/duck/Saudi Arabia/6732-7/2007         |                                       | Istituto Zooprofilattico Sperimentale Delle Veneziae             |
| EPI211193 | PB1 | Poland       | 2009-Feb-16 | A/mallard/Poland/41/09                  | National Veterinary Research Institut | National Veterinary Research Institute                           |
| EPI211183 | PB1 | Poland       | 2009-Jan-12 | A/mallard/Poland/16/09                  | National Veterinary Research Institut | National Veterinary Research Institute                           |
| EPI186396 | PB1 | Slovenia     | 2006-Jan-01 | A/Anas platyrhynchos/Slovenia/359/2     | University of Ljubljana               | Friedrich-Loeffler-Institut                                      |
| EPI180549 | PB1 | Italy        | 2005-Jan-01 | A/mallard/Italy/119/2005                |                                       | Istituto Zooprofilattico Sperimentale Delle Veneziae             |
| EPI178558 | PB1 | Italy        | 2006-Jan-01 | A/Mallard/Italy/46341-12/2006           |                                       | Istituto Zooprofilattico Sperimentale della Lombardia e dell'Emi |
| EPI174878 | PB1 | Denmark      | 2005-Sep-07 | A/mallard/Denmark/77-64849-G2/20        | Technical University of Denmark       | National Veterinary Institute                                    |
| EPI174870 | PB1 | Denmark      | 2005-Oct-27 | A/mallard/Denmark/77-64650-G4/20        | Technical University of Denmark       | National Veterinary Institute                                    |
| EPI174863 | PB1 | Denmark      | 2005-Sep-19 | A/mallard/Denmark/77-64590-5/2005       | Technical University of Denmark       | National Veterinary Institute                                    |
| EPI174856 | PB1 | Denmark      | 2002-Apr-17 | A/mallard/Denmark/74-08216/2002         | Technical University of Denmark       | National Veterinary Institute                                    |
| EPI174817 | PB1 | Denmark      | 2005-Oct-27 | A/mallard/Denmark/77-64650-G10/2        | Technical University of Denmark       | National Veterinary Institute                                    |
| EPI169549 | PB1 | Sweden       | 2003-Jan-01 | A/Mallard/Sweden/S90754/2003            | National Veterinary Institute         | National Veterinary Institute                                    |
| EPI211182 | PB1 | Poland       | 2007-Dec-28 | A/mallard/Poland/01/08                  | National Veterinary Research Institut | National Veterinary Research Institute                           |
| EPI169333 | PB1 | Belgium      | 2007-Sep-18 | A/Anas platyrhynchos/Belgium/12827/2007 |                                       | Veterinary and Agrochemical Research Institute                   |
| EPI169281 | PB1 | France       | 2006-Nov-22 | A/duck/France/061054/2006               |                                       | AFSSA                                                            |
| EPI169273 | PB1 | France       | 2006-Nov-08 | A/duck/France/06964/2006                |                                       | AFSSA                                                            |
| EPI174851 | PB1 | Denmark      | 2005-Sep-25 | A/duck/Denmark/75-65472-P34/2003        | Technical University of Denmark       | National Veterinary Institute                                    |
| EPI174844 | PB1 | Denmark      | 2003-Sep-25 | A/duck/Denmark/75-65472-P31/2003        | Technical University of Denmark       | National Veterinary Institute                                    |
| EPI174838 | PB1 | Denmark      | 2003-Sep-25 | A/duck/Denmark/75-65472-P24/2003        | Technical University of Denmark       | National Veterinary Institute                                    |
| EPI174831 | PB1 | Denmark      | 2002-Sep-23 | A/duck/Denmark/74-68425/2002            | Technical University of Denmark       | National Veterinary Institute                                    |
| EPI168465 | PB1 | Vietnam      | 2003-Jan-01 | A/duck/Vietnam/NCVD1/2003               |                                       | Centers for Disease Control and Prevention                       |



Supplementary Table 1

|           |     |         |             |                         |  |                                            |
|-----------|-----|---------|-------------|-------------------------|--|--------------------------------------------|
| EPI168458 | PB1 | Vietnam | 2001-Jan-01 | A/duck/Vietnam/68/2001  |  | Centers for Disease Control and Prevention |
| EPI168451 | PB1 | Vietnam | 2001-Jan-01 | A/duck/Vietnam/342/2001 |  | Centers for Disease Control and Prevention |
| EPI168444 | PB1 | Vietnam | 2001-Jan-01 | A/duck/Vietnam/340/2001 |  | Centers for Disease Control and Prevention |
